# Supplementary material for: Mapping catalyst activation, turnover speciation and deactivation in Rh/PPh3-catalysed olefin hydroformylation
Source: Royal Society of Chemistry journal article supplement (doi:10.1039/d2cy00312k), 2022-01-01
Supplement: d2cy00312k1.xlsx [file d2cy00312k1.xlsx]

## Sheet: Proton
time [min]:	Peak name	hydrogen bond #1	acac coordinated #1	acac decoordinatedl #1	Hydrogen #2	TMB aromatic #3	TMB methyl #9	1-hexene (other H double bond)	[1-hexene]	[1-heptanal]	[2-methylhexanal]	[Hydrogen]	[TMB aromatic]	[TMB methyl]	[1-hexene (other H double bond)]
0.0166667	I0	1.3106e+06	214274	15752.2	920.625		9.19162e+07		29.3297	5.69416	0.386265	0.00216755	0	89.8611	0						INTERNAL REFERENCE			FLOW CALIBRATION
5.88333	I1	982424	217780	24371.8	11829.2		9.18665e+07		21.9973	5.79047	0.597949	0.0278662	0	89.8611	0						1-hexene Volume (mL)	1.3			1-hexene (initial)	1-hexene (end)	1-heptanal (end)	2-methylhexanal (end)	Hydrogen (end)	TMB aromatic (initial)	TMB methyl (initial)	TMB aromatic (end)	TMB methyl (end)	1-hexene (other H double bond)
11.6167	I2	1.01855e+06	181418	30488.9	4.09524e+06		9.14547e+07		22.909	4.84536	0.751398	9.69061	0	89.8611	0						1-hexene n (moles)	0.0104729		0 mL/min	29142933	4176547	20157390	6.62235e+06	1074285	2.00388e+07	62136918	20500117	6.30756e+07	6.17893e+06
17.3667	I3	1.01355e+06	129474	92398.4	4.50889e+06		9.15544e+07		22.7717	3.45427	2.27468	10.6578	0	89.8611	0						Reaction Volume (L)	0.0224		4 mL/min	6.75363e+06	987741	4.8867e+06	1.7202e+06	1.58738e+06	7.57361e+06	3.6012e+07	8.49335e+06	3.78577e+07	1.62179e+06
23.0833	I4	1.00476e+06	82923.5	87688.1	4.44175e+06		9.16013e+07		22.5625	2.2112	2.15761	10.4938	0	89.8611	0						1-hexene (M)	0.467541		CF	4.31515	4.22838	4.12495	3.84975	0.676765	2.64587	1.72545	2.41367	1.66612	3.80995
28.8167	I5	1.03147e+06	50063.2	120900	4.43541e+06		9.18261e+07		23.1058	1.3317	2.96752	10.4531	0	89.8611	0						1-hexene(mM)	467.541
34.5333	I6	1.08686e+06	45949.8	120495	4438881		9.21125e+07		24.2708	1.21848	2.94838	10.4288	0	89.8611	0
40.25	I7	1.02569e+06	13707.5	161468	4.45128e+06		9.19762e+07		22.9387	0.364028	3.9568	10.4734	0	89.8611	0						# is the number of protons of the peak taken for integration			0 mL	static with long delay (flow+ full relaxtion effects)
45.9667	I8	1.05508e+06	24163.8	135428	4.44137e+06		9.17725e+07		23.6483	0.643138	3.32607	10.4733	0	89.8611	0						If #>1 the integration will be divided by the number of protons			4 mL	flow with shot delay (flow + poor relaxiation)
51.6833	I9	1.06852e+06	12878	151687	4483406		91883751		23.9207	0.342343	3.72086	10.5596	0	89.8611	0
57.4167	I10	1114193	1089.25	145784	4.53083e+06		9.26867e+07		24.727	0.0287053	3.54509	10.5788	0	89.8611	0										initial CF were calculated under Argon ( the reactor was still no pressurized)
63.15	I11	1.01614e+06	-2484.38	155125	4.53019e+06		9.30996e+07		22.4509	-0.065181	3.75551	10.5304	0	89.8611	0						INTERNAL REFERENCE STANDARD				final CF were calculated under 10 bar H2/CO ( reactor pressurized)
68.8833	I12	1.04729e+06	-15740.5	139554	4.48884e+06		9.25355e+07		23.2801	-0.415491	3.39914	10.4979	0	89.8611	0						Mass of TMB (g)	0.3189
74.6167	I13	1.12517e+06	7843.12	143030	4.50395e+06		92410215		25.0454	0.20731	3.48853	10.5476	0	89.8611	0						Molecular weight of TMB (g/mol)	168.19
80.3667	I14	1.13726e+06	-17537.6	143250	4.51178e+06		9.28193e+07		25.2029	-0.461514	3.47849	10.5193	0	89.8611	0						Moles of TMB (n)	0.00189607
86.1	I15	1.07089e+06	-4355.75	140744	4.46969e+06		9.26945e+07		23.7639	-0.114779	3.42224	10.4352	0	89.8611	0						Reaction Volume (L)	0.0211
91.8167	I16	1.09756e+06	-35623.4	160435	4.45429e+06		9.27793e+07		24.3336	-0.937856	3.89748	10.3898	0	89.8611	0						TMB (M)	0.0898611
97.55	I17	1039700	1057.62	145994	4.45255e+06		9.25616e+07		23.105	0.0279096	3.55499	10.4101	0	89.8611	0						TMB (mM)	89.8611		FLOW CALIBRATION
103.283	I18	1.03627e+06	-24947.2	136864	4.4655e+06		92332984		23.0859	-0.65996	3.34092	10.4663	0	89.8611	0										1-hexene (initial)	1-hexene (end)	1-heptanal (end)	2-methylhexanal (end)	Hydrogen (end)	TMB aromatic (initial)	TMB methyl (initial)	TMB aromatic (end)	TMB methyl (end)	1-hexene (other H double bond)
109.017	I19	1.10311e+06	15860	147924	4.57054e+06		9.31695e+07		24.3542	0.415797	3.57849	10.6163	0	89.8611	0									0 mL/min	2.78016e+07	7.53593e+06	1.87317e+07	5722346	4.41821e+06	2.16925e+07	6.43757e+07	2.16584e+07	6.12478e+07	1.44223e+07
114.75	I20	1.09671e+06	-15513.2	145081	4512156		9.27515e+07		24.3221	-0.40854	3.52553	10.5279	0	89.8611	0									4 mL/min	6.11977e+06	1757276	3.67838e+06	1.21779e+06	3.89945e+06	7.34342e+06	3.6664e+07	7.98182e+06	3.63252e+07	3.68713e+06
120.467	I21	1.051e+06	10315.6	136338	4.47403e+06		9.24991e+07		23.372	0.272402	3.32212	10.4674	0	89.8611	0									CF	4.54292	4.28842	5.09238	4.69897	1.13304	2.954	1.75583	2.71347	1.6861	3.91153
126.183	I22	1.06838e+06	-8001.38	144740	4.4575e+06		9.24048e+07		23.7826	-0.211506	3.53044	10.4394	0	89.8611	0
131.917	I23	1.07956e+06	-7875.25	136121	4.41992e+06		92062172		24.121	-0.208947	3.33256	10.3899	0	89.8611	0
137.633	I24	1.10236e+06	-21431.9	153599	4383455		9.19966e+07		24.6479	-0.569037	3.76316	10.3115	0	89.8611	0
143.383	I25	1.06648e+06	1432.12	129064	4.48969e+06		9.32849e+07		23.5164	0.0374992	3.11838	10.4156	0	89.8611	0
149.117	I26	1.05453e+06	-21465.6	158525	4.45646e+06		92684104		23.4036	-0.565705	3.85502	10.4055	0	89.8611	0
154.85	I27	1.08912e+06	-18804.1	155998	4525879		9.30751e+07		24.0697	-0.493482	3.77762	10.5232	0	89.8611	0
160.567	I28	1.05511e+06	-8831.88	140983	4.43873e+06		9.39271e+07		23.1066	-0.229675	3.38307	10.2269	0	89.8611	0
166.317	I29	1.10578e+06	-21958.4	154115	4.52149e+06		9.30396e+07		24.4473	-0.57648	3.73346	10.517	0	89.8611	0
172.083	I30	1081889	-5653.38	139132	4.54422e+06		93502100		23.8007	-0.147686	3.35382	10.5176	0	89.8611	0
177.833	I31	1.05844e+06	-17162.4	144579	4.43469e+06		93245167		23.349	-0.449576	3.49474	10.2924	0	89.8611	0
183.567	I32	1.06807e+06	-16511.2	144822	4.52519e+06		9.34306e+07		23.5148	-0.431661	3.49365	10.4816	0	89.8611	0
189.3	I33	1.10625e+06	-13562	151972	4.53162e+06		9.3623e+07		24.3053	-0.353829	3.6586	10.4749	0	89.8611	0
195.033	I34	1.04276e+06	-4953.62	122299	4.46321e+06		9.31252e+07		23.0327	-0.12993	2.96	10.3719	0	89.8611	0
200.767	I35	1.10701e+06	-9752.62	156045	4.44861e+06		9.31814e+07		24.4372	-0.255649	3.77446	10.3317	0	89.8611	0
206.483	I36	1.08609e+06	-16540.5	138014	4530547		9.34474e+07		23.907	-0.432348	3.32881	10.4921	0	89.8611	0
212.217	I37	1.11932e+06	-20324	157742	4.40632e+06		93107529		24.7285	-0.533183	3.81854	10.2416	0	89.8611	0
217.95	I38	1.07333e+06	-8430.5	137367	4479917		9.32757e+07		23.6697	-0.220768	3.31932	10.3939	0	89.8611	0
223.683	I39	1.06053e+06	1278.25	148528	4.48216e+06		9.34414e+07		23.346	0.033414	3.58264	10.3807	0	89.8611	0
229.433	I40	1.09111e+06	-6649	138944	4.43033e+06		9.30784e+07		24.1129	-0.174486	3.36454	10.3007	0	89.8611	0
235.167	I41	1.06209e+06	-13910.4	131964	4.50535e+06		9.33638e+07		23.3998	-0.363926	3.18575	10.4431	0	89.8611	0
240.883	I42	1.10949e+06	-1353.12	137856	4.4407e+06		9.48661e+07		24.057	-0.0348401	3.27528	10.1302	0	89.8611	0
246.617	I43	1.1303e+06	-22194.8	149284	4.4561e+06		9.33769e+07		24.8991	-0.580581	3.60336	10.3275	0	89.8611	0
252.35	I44	1.08666e+06	-8569.62	141422	4.46718e+06		9.35588e+07		23.8911	-0.223733	3.40697	10.333	0	89.8611	0
258.1	I45	1.05139e+06	7485.38	144927	4381532		9.48611e+07		22.7984	0.192742	3.44346	9.99576	0	89.8611	0
263.8	I46	1.11901e+06	7126	142223	4.39655e+06		9.3643e+07		24.5803	0.185876	3.42317	10.1605	0	89.8611	0
269.517	I47	1159611	-12626.4	144592	4.46895e+06		9.43299e+07		25.2866	-0.32695	3.45486	10.2526	0	89.8611	0
275.217	I48	1063718	-13959.9	141342	4.39938e+06		9.34153e+07		23.4227	-0.365019	3.41027	10.1918	0	89.8611	0
280.917	I49	1.08991e+06	-10301.8	159686	4421038		9.34525e+07		23.99	-0.26926	3.85132	10.2379	0	89.8611	0
286.667	I50	1.1112e+06	-9465.5	129784	4352021		9.39881e+07		24.3192	-0.245993	3.1123	10.0207	0	89.8611	0
292.4	I51	1135185	-2544	135373	4.4071e+06		9.34611e+07		24.9841	-0.0664872	3.26465	10.2047	0	89.8611	0
298.117	I52	1.06685e+06	-27005.9	142954	4.49086e+06		9.37627e+07		23.4047	-0.703526	3.43637	10.3652	0	89.8611	0
303.833	I53	1.04512e+06	-9998.62	150693	4.41114e+06		9.45292e+07		22.742	-0.258361	3.59303	10.0986	0	89.8611	0
309.55	I54	1.04419e+06	-5244.5	152314	4.36893e+06		9.3779e+07		22.9036	-0.1366	3.66074	10.082	0	89.8611	0
315.267	I55	1.10437e+06	-31204.2	141919	4.39324e+06		9.39585e+07		24.1773	-0.811203	3.40438	10.1187	0	89.8611	0
321.017	I56	1.11111e+06	2702.25	147686	4.32281e+06		9.34706e+07		24.4518	0.0706159	3.56122	10.0085	0	89.8611	0
326.733	I57	1.04536e+06	-11948.4	145003	4.41206e+06		93814783		22.9204	-0.311093	3.48369	10.1777	0	89.8611	0
332.467	I58	1.10095e+06	-9771.75	122176	4.42324e+06		9.45778e+07		23.9445	-0.252368	2.9116	10.1211	0	89.8611	0
338.2	I59	1.0571e+06	-9708.88	140276	4.34874e+06		9.41831e+07		23.0872	-0.251796	3.35695	9.99236	0	89.8611	0
343.933	I60	1082181	5354.25	134383	4.4398e+06		9.39969e+07		23.6818	0.139135	3.2223	10.2218	0	89.8611	0
349.65	I61	1.10902e+06	-16173.4	137654	4.41784e+06		93568098		24.3804	-0.422206	3.31585	10.2179	0	89.8611	0
355.383	I62	1.07123e+06	-4226.25	120998	4.36639e+06		9.31879e+07		23.6457	-0.110777	2.92653	10.1401	0	89.8611	0
361.083	I63	1.1121e+06	-13453.4	127493	4.38528e+06		93552615		24.4522	-0.351259	3.07161	10.1442	0	89.8611	0
366.8	I64	1.13417e+06	-6351.38	132657	4.36077e+06		9.48268e+07		24.6023	-0.163602	3.15308	9.95199	0	89.8611	0
372.533	I65	1.11551e+06	14492.1	132390	4.37409e+06		9.40523e+07		24.3968	0.37637	3.17262	10.0646	0	89.8611	0
378.233	I66	1.08509e+06	10722.9	126612	4.40362e+06		9.3791e+07		23.7975	0.279256	3.04262	10.1608	0	89.8611	0
383.95	I67	1.1134e+06	-16022.9	140174	4.34847e+06		9.39998e+07		24.3642	-0.416357	3.36104	10.0112	0	89.8611	0
389.667	I68	1107866	-8664.12	136418	4.27122e+06		9.32464e+07		24.439	-0.226958	3.29741	9.91284	0	89.8611	0
395.367	I69	1.12108e+06	-9791.75	120210	4.35483e+06		9.34188e+07		24.6848	-0.256023	2.90028	10.0882	0	89.8611	0
401.083	I70	1.08532e+06	-12220.9	153962	4307804		9.4315e+07		23.6705	-0.3165	3.6793	9.88446	0	89.8611	0
406.8	I71	1.11156e+06	-3177.38	136423	4.31834e+06		9.37511e+07		24.3885	-0.0827835	3.27978	9.96824	0	89.8611	0
412.5	I72	1.06756e+06	-5724.75	127714	4.35776e+06		93654140		23.4473	-0.149307	3.07359	10.0697	0	89.8611	0
418.233	I73	1.10263e+06	-32161.9	133609	4259307		9.31012e+07		24.3614	-0.843797	3.23455	9.9006	0	89.8611	0
423.967	I74	1.08482e+06	-16235.9	132896	4.27986e+06		9.30097e+07		23.9916	-0.426383	3.22045	9.95817	0	89.8611	0
429.717	I75	1.14085e+06	-8562.25	133282	4.19776e+06		9.27388e+07		25.3044	-0.225517	3.23924	9.79567	0	89.8611	0
435.433	I76	1.0972e+06	-27646.9	156324	4.30231e+06		9.31964e+07		24.2167	-0.724601	3.7806	9.99035	0	89.8611	0
441.15	I77	1.08809e+06	-1014.62	124148	4.32829e+06		93644817		23.9007	-0.0264651	2.98807	10.0025	0	89.8611	0
446.867	I78	1.11506e+06	-16706.4	136869	4.27899e+06		9.31963e+07		24.611	-0.43786	3.31011	9.93621	0	89.8611	0
452.617	I79	1106140	165.25	123221	4.3412e+06		9.36858e+07		24.2865	0.00430844	2.96445	10.028	0	89.8611	0
458.333	I80	1.0775e+06	-8747.75	138754	4266932		9.42068e+07		23.5269	-0.226812	3.31969	9.80193	0	89.8611	0
464.067	I81	1.10795e+06	13777.5	122708	4.29711e+06		9.32369e+07		24.4434	0.36094	2.96634	9.97393	0	89.8611	0
469.85	I82	1.1063e+06	1196.75	144873	4.359e+06		9.36916e+07		24.2884	0.0312	3.48515	10.0685	0	89.8611	0
475.567	I83	1.1119e+06	3906.25	120177	4.24589e+06		9.29998e+07		24.5931	0.102596	2.91255	9.88018	0	89.8611	0
481.333	I84	1.13802e+06	-4255.25	137644	4311487		9.34717e+07		25.0438	-0.111198	3.31903	9.98217	0	89.8611	0
487.067	I85	1.06521e+06	-27040.8	130171	4.32594e+06		9.3396e+07		23.4604	-0.7072	3.14138	10.0238	0	89.8611	0
492.8	I86	1.03039e+06	-739.125	134369	4.25685e+06		9.30793e+07		22.7708	-0.0193962	3.25371	9.89722	0	89.8611	0
498.533	I87	1.0691e+06	-5855.62	110159	4.31991e+06		93394967		23.5462	-0.153145	2.65846	10.0099	0	89.8611	0
504.283	I88	1.05401e+06	4647.62	140714	4.33425e+06		9.38825e+07		23.0934	0.12092	3.37821	9.99096	0	89.8611	0
510.017	I89	1.07705e+06	-6092.38	139845	4.21804e+06		9.33383e+07		23.7358	-0.159433	3.37693	9.77977	0	89.8611	0
515.767	I90	1077859	-701.625	150968	4.23115e+06		9.34952e+07		23.7138	-0.0183302	3.63941	9.7937	0	89.8611	0
521.5	I91	1.02196e+06	-22435	138948	4.21897e+06		9.35415e+07		22.4728	-0.585833	3.34796	9.76067	0	89.8611	0
527.217	I92	1.12488e+06	-17302.9	146526	4.16889e+06		9.30597e+07		24.8641	-0.45416	3.54886	9.69475	0	89.8611	0
532.967	I93	1.09415e+06	-21324.4	137372	4.26291e+06		93936578		23.9592	-0.55449	3.29608	9.82085	0	89.8611	0
538.7	I94	1.1023e+06	-2743.38	124773	4.1889e+06		9.36199e+07		24.2192	-0.0715762	3.00392	9.683	0	89.8611	0
544.433	I95	1.03057e+06	-15904.2	136940	4.26017e+06		9.32345e+07		22.7367	-0.416666	3.31046	9.88845	0	89.8611	0
550.183	I96	1.12415e+06	-13934	144490	4.21052e+06		9.43126e+07		24.5179	-0.360876	3.45305	9.66149	0	89.8611	0
555.917	I97	1.06834e+06	-7818.12	134300	4.23036e+06		9.32293e+07		23.5714	-0.204834	3.24682	9.8198	0	89.8611	0
561.667	I98	1.09693e+06	-6486.25	146547	4.26301e+06		93849523		24.0422	-0.168816	3.51948	9.83021	0	89.8611	0
567.417	I99	1134031	-14473.2	124585	4.18801e+06		9.34497e+07		24.9618	-0.378303	3.00485	9.69859	0	89.8611	0
573.133	I100	1.08584e+06	-21404.5	137135	4.2231e+06		9.32263e+07		23.9583	-0.560814	3.31546	9.80326	0	89.8611	0
578.867	I101	1.10438e+06	-19875	128700	4.22383e+06		9.36429e+07		24.2588	-0.518423	3.0977	9.76134	0	89.8611	0
584.583	I102	1017385	1365.88	128346	4.17845e+06		9.31588e+07		22.4641	0.0358129	3.10523	9.70666	0	89.8611	0
590.317	I103	1.0862e+06	3574	128082	4.24971e+06		93693270		23.8468	0.0931747	3.08116	9.81587	0	89.8611	0
596.017	I104	1.08318e+06	465.375	138569	4.18725e+06		9.53541e+07		23.3663	0.0119211	3.27537	9.50315	0	89.8611	0
601.733	I105	1.09346e+06	-4902.5	151133	4.21319e+06		9.3416e+07		24.0775	-0.128188	3.64647	9.76041	0	89.8611	0
607.483	I106	1.09786e+06	-15986	126389	4.27224e+06		9.40015e+07		24.0238	-0.415391	3.03047	9.83555	0	89.8611	0
613.2	I107	1.06752e+06	-4575.88	118246	4.15434e+06		9.31743e+07		23.5672	-0.119958	2.86039	9.64903	0	89.8611	0
618.95	I108	1.09646e+06	-7548.62	118936	4.21383e+06		9.36429e+07		24.0851	-0.1969	2.86269	9.73824	0	89.8611	0
624.7	I109	1.04012e+06	13426.1	113214	4.21469e+06		9.38948e+07		22.7861	0.34927	2.71765	9.7141	0	89.8611	0
630.433	I110	1.11875e+06	-1819.75	141017	4.19889e+06		9.31606e+07		24.7017	-0.0477124	3.41172	9.75394	0	89.8611	0
636.15	I111	1.08978e+06	13258.8	129020	4.2244e+06		9.35267e+07		23.968	0.346273	3.10925	9.77479	0	89.8611	0
641.9	I112	1.05894e+06	-12829.1	131770	4.18035e+06		9.39096e+07		23.1947	-0.333687	3.16257	9.63344	0	89.8611	0
647.65	I113	1.13254e+06	-15419.2	141570	4.13552e+06		93522928		24.9093	-0.402714	3.41184	9.56951	0	89.8611	0
653.383	I114	1.06942e+06	-13102.2	136098	4206929		9.40287e+07		23.3946	-0.340359	3.26231	9.6824	0	89.8611	0
659.133	I115	1.10677e+06	-11553.2	128972	4.11782e+06		93138515		24.4431	-0.302989	3.12106	9.56789	0	89.8611	0
664.867	I116	1.07248e+06	-11505.4	131906	4.16365e+06		9.3191e+07		23.6726	-0.301564	3.19025	9.66892	0	89.8611	0
670.6	I117	1.09237e+06	-7092.38	139420	4.17089e+06		9.397e+07		23.9117	-0.184355	3.34403	9.60545	0	89.8611	0
676.333	I118	1.12786e+06	-11367	132983	4.14858e+06		9.36804e+07		24.7648	-0.29638	3.19949	9.5836	0	89.8611	0
682.083	I119	1.04862e+06	-9920.88	147629	4.19899e+06		9.38206e+07		22.9904	-0.258288	3.54657	9.68556	0	89.8611	0
687.8	I120	1.12576e+06	4714.5	128401	4.05689e+06		9.27384e+07		24.9698	0.124173	3.12064	9.46699	0	89.8611	0
693.5	I121	1.10456e+06	-13986.4	138492	4.10377e+06		9.30437e+07		24.4191	-0.367172	3.35485	9.54495	0	89.8611	0
699.233	I122	1081751	19610.4	132879	4.08339e+06		9.42178e+07		23.6169	0.508399	3.17876	9.37921	0	89.8611	0
704.95	I123	1076035	-4250.38	144207	4.13447e+06		9.32454e+07		23.7371	-0.11134	3.48573	9.59556	0	89.8611	0
710.717	I124	1.05502e+06	-1470.38	129033	4.19384e+06		93732663		23.1526	-0.0383168	3.10274	9.68277	0	89.8611	0
716.45	I125	1.09291e+06	3761.88	138445	4.11357e+06		93290670		24.0976	0.0984959	3.34483	9.54243	0	89.8611	0
722.167	I126	1079118	-2674.5	136257	4.1252e+06		9.36688e+07		23.6975	-0.0697429	3.27868	9.53078	0	89.8611	0
727.9	I127	1.11766e+06	-8958.88	126827	4.09575e+06		9.39648e+07		24.4666	-0.232884	3.04216	9.43293	0	89.8611	0
733.617	I128	1.1074e+06	-3164.5	140471	4.05351e+06		9.32784e+07		24.4202	-0.0828659	3.39421	9.40433	0	89.8611	0
739.35	I129	1.07745e+06	-9474.5	124691	4.13253e+06		9.3663e+07		23.6623	-0.247082	3.00055	9.54831	0	89.8611	0
745.067	I130	1.08893e+06	-7023.38	129438	4.06614e+06		9.3142e+07		24.0483	-0.184184	3.13221	9.44745	0	89.8611	0
750.8	I131	1126402	-6826	135592	4.11934e+06		9.36042e+07		24.7529	-0.178124	3.26492	9.52381	0	89.8611	0
756.55	I132	1.08248e+06	-3701.75	140362	4101101		9.41088e+07		23.6602	-0.0960791	3.36166	9.4308	0	89.8611	0
762.267	I133	1.12088e+06	12007.4	125136	4.08143e+06		9.33841e+07		24.6896	0.314071	3.02026	9.4584	0	89.8611	0
767.967	I134	1.05913e+06	5614.62	127570	4.16966e+06		9.36487e+07		23.2636	0.146444	3.0703	9.63557	0	89.8611	0
773.7	I135	1139857	-7110	107212	4.05605e+06		9.33089e+07		25.1279	-0.186122	2.58974	9.40716	0	89.8611	0
		410048	1040.55	72144.8	1.91494e+06		5.14645e+07		16.3891	0.0493863	3.1596	8.0524	0	89.8611	0
		434143	-4158.01	63784.8	1.8627e+06		5.10496e+07		17.4932	-0.19895	2.81617	7.89639	0	89.8611	0
		432064	-1193.83	74437.1	1.91996e+06		5.15654e+07		17.2353	-0.0565504	3.25361	8.05773	0	89.8611	0
		279489	2907	69691.1	1.90704e+06		5.15178e+07		11.1593	0.137829	3.04898	8.01087	0	89.8611	0

## Sheet: Hydride
time [min]:	Peak name	Hydride 1 at -8.92 ppm	Hydride 2 at-9.23 ppm	Riv 1	Riv 2	[/B]	[C]	Sum Hyds	%			1	2
0.0166667	I0	-42448.8	10743.4	-757.294	191.665	-0.00940608	0.0023806	-0.00702548	-0.291983	RG Calibration				Flow Calibration
5.88333	I1	7561.66	19078.4	134.901	340.362	0.00167556	0.00422751	0.00590307	0.245335		Hyd 1	Hyd 2			Hyd1	Hyd 2	1-hexene
11.6167	I2	1.24238e+06	40985.8	22164.3	731.194	0.275295	0.0090819	0.284377	11.8189	CF	0.9894	0.9894		0 mL/min	4.56654e+06	4.56654e+06	29142933
17.3667	I3	2.67064e+06	71223.5	47644.8	1270.64	0.591779	0.0157822	0.607561	25.2506	RG Hyd	203	203		4 mL/min	4.44376e+06	4.44376e+06	6.75363e+06
23.0833	I4	3.71257e+06	78414.4	66232.9	1398.93	0.822656	0.0173756	0.840031	34.9122	RG 1H	3.2	3.2		CF	1.14386	1.14386	4.31515
28.8167	I5	4.43603e+06	83795.9	79139.7	1494.93	0.982966	0.0185681	1.00153	41.6243	Int TMB	65113391	65113391
34.5333	I6	4.9391e+06	95939.9	88114.6	1711.59	1.09444	0.021259	1.1157	46.369	[TMB]	89.8611	89.8611
40.25	I7	5.26008e+06	109905	93840.9	1960.72	1.16556	0.0243534	1.18992	49.4536
45.95	I8	5.57529e+06	183664	99464.3	3276.61	1.23541	0.0406976	1.27611	53.0358	IRF	64.1171	64.1171
51.6833	I9	5.73771e+06	86905.8	102362	1550.42	1.2714	0.0192572	1.29066	53.6404
57.4167	I10	5.92907e+06	132716	105776	2367.69	1.3138	0.0294082	1.34321	55.8246
63.15	I11	5.99909e+06	173576	107025	3096.62	1.32932	0.0384621	1.36778	56.8457
68.8833	I12	5.98075e+06	94468.3	106698	1685.33	1.32526	0.0209329	1.34619	55.9483
74.6167	I13	5.98837e+06	79683.6	106834	1421.57	1.32694	0.0176568	1.3446	55.8824
80.3667	I14	6.03217e+06	67017.2	107615	1195.6	1.33665	0.0148501	1.3515	56.169
86.1	I15	6.04788e+06	106988	107895	1908.69	1.34013	0.0237072	1.36384	56.6819
91.8167	I16	6.03442e+06	82289.3	107655	1468.06	1.33715	0.0182342	1.35538	56.3304
97.55	I17	6.03729e+06	142653	107706	2544.96	1.33778	0.03161	1.36939	56.9128
103.267	I18	6.02845e+06	135777	107549	2422.28	1.33582	0.0300863	1.36591	56.768
109	I19	6.00642e+06	94074	107156	1678.3	1.33094	0.0208455	1.35179	56.1811
114.733	I20	5.99241e+06	84145.5	106906	1501.17	1.32784	0.0186455	1.34648	55.9606
120.467	I21	5.98856e+06	171596	106837	3061.3	1.32699	0.0380234	1.36501	56.7305
126.183	I22	5.95925e+06	129299	106314	2306.73	1.32049	0.028651	1.34914	56.0711
131.917	I23	5.92633e+06	72887.6	105727	1300.33	1.3132	0.0161509	1.32935	55.2484
137.633	I24	5.87156e+06	110683	104750	1974.6	1.30106	0.0245258	1.32558	55.092
143.383	I25	5.8745e+06	123750	104802	2207.73	1.30171	0.0274214	1.32913	55.2394
149.1	I26	5.85171e+06	116990	104396	2087.13	1.29666	0.0259235	1.32258	54.9674
154.85	I27	5.8061e+06	111745	103582	1993.56	1.28655	0.0247613	1.31132	54.499
160.567	I28	5.78266e+06	52275	103164	932.596	1.28136	0.0115834	1.29294	53.7354
166.317	I29	5.75321e+06	78246.3	102638	1395.93	1.27484	0.0173383	1.29217	53.7035
172.083	I30	5.73818e+06	110142	102370	1964.96	1.2715	0.0244061	1.29591	53.8588
177.833	I31	5.6851e+06	99930.3	101423	1782.78	1.25974	0.0221432	1.28188	53.2758
183.567	I32	5.65323e+06	98732.4	100855	1761.4	1.25268	0.0218778	1.27456	52.9713
189.3	I33	5.60392e+06	102421	99975.1	1827.21	1.24175	0.0226951	1.26445	52.5512
195.033	I34	5.54589e+06	26897	98939.8	479.847	1.2289	0.00596001	1.23486	51.3213
200.75	I35	5.52087e+06	120317	98493.3	2146.48	1.22335	0.0266607	1.25001	51.9512
206.467	I36	5.5148e+06	92290.8	98385.1	1646.49	1.22201	0.0204504	1.24246	51.6372
212.2	I37	5.46634e+06	68361.2	97520.6	1219.58	1.21127	0.0151479	1.22642	50.9706
217.95	I38	5.4104e+06	62002.2	96522.5	1106.13	1.19887	0.0137389	1.21261	50.3968
223.683	I39	5.4262e+06	105133	96804.4	1875.59	1.20237	0.023296	1.22567	50.9395
229.433	I40	5.33931e+06	129598	95254.3	2312.05	1.18312	0.0287172	1.21184	50.3646
235.167	I41	5.32716e+06	101074	95037.5	1803.17	1.18043	0.0223966	1.20282	49.99			Rh concentration
240.883	I42	5.26065e+06	36426.1	93851.1	649.849	1.16569	0.00807154	1.17376	48.7822			actual weight (g)	0.0131
246.617	I43	5.21463e+06	109801	93030	1958.86	1.15549	0.0243303	1.17982	49.0341			MW RhHCO(PPh3)3 (g/mol)	918.78
252.35	I44	5.20205e+06	119887	92805.6	2138.81	1.15271	0.0265654	1.17927	49.0112			MW Rh(acac)(CO)2 (g/mol)	258.03
258.083	I45	5.14752e+06	75442	91832.7	1345.9	1.14062	0.0167169	1.15734	48.0996			Number of mol (n)	5.07693e-05
263.783	I46	5.14024e+06	96322.1	91702.9	1718.4	1.13901	0.0213437	1.16035	48.2249			actual volume of reaction (L)	0.0211
269.5	I47	5.10391e+06	76121.9	91054.8	1358.03	1.13096	0.0168676	1.14783	47.7043			[Rh] (M)	0.00240613
275.217	I48	5.07567e+06	145375	90550.9	2593.51	1.1247	0.0322131	1.15691	48.0819			[Rh] (mM)	2.40613
280.917	I49	5.03901e+06	103811	89896.9	1852.02	1.11658	0.0230032	1.13958	47.3616
286.65	I50	4.99631e+06	84233.8	89135.1	1502.75	1.10712	0.0186651	1.12578	46.7881
292.383	I51	4.95432e+06	107790	88386.1	1923	1.09781	0.0238849	1.1217	46.6184
298.1	I52	4.88288e+06	76064	87111.6	1357	1.08198	0.0168548	1.09884	45.6683
303.817	I53	4.8821e+06	105240	87097.5	1877.5	1.08181	0.0233198	1.10513	45.9297
309.533	I54	4.77445e+06	41370	85177	738.048	1.05795	0.00916703	1.06712	44.3501
315.25	I55	4.78576e+06	99413	85378.9	1773.55	1.06046	0.0220286	1.08249	44.9889
321	I56	4.79142e+06	145200	85479.8	2590.4	1.06171	0.0321745	1.09389	45.4626			36.4751
326.717	I57	4.68786e+06	29544.2	83632.3	527.075	1.03877	0.00654661	1.04531	43.4438
332.45	I58	4.69314e+06	89498.9	83726.4	1596.68	1.03994	0.0198318	1.05977	44.0445
338.183	I59	4.72044e+06	75897.2	84213.6	1354.02	1.04599	0.0168178	1.06281	44.1708
343.917	I60	4.63345e+06	115592	82661.7	2062.18	1.02671	0.0256136	1.05232	43.7352
349.633	I61	4.5796e+06	98117.3	81701	1750.43	1.01478	0.0217415	1.03652	43.0784
355.367	I62	4.57257e+06	90879.7	81575.6	1621.31	1.01322	0.0201377	1.03336	42.947
361.067	I63	4.53321e+06	91163.9	80873.4	1626.38	1.0045	0.0202007	1.0247	42.5871
366.8	I64	4.537e+06	143135	80940.9	2553.55	1.00534	0.0317167	1.03705	43.1006
372.517	I65	4.50334e+06	114818	80340.5	2048.38	0.997881	0.0254422	1.02332	42.5299
378.217	I66	4.46007e+06	81593.4	79568.6	1455.64	0.988293	0.01808	1.00637	41.8254
383.933	I67	4.43097e+06	84599.6	79049.4	1509.27	0.981844	0.0187462	1.00059	41.5851
389.667	I68	4.38946e+06	65871.5	78308.8	1175.16	0.972646	0.0145963	0.987242	41.0303
395.367	I69	4.31679e+06	86924.3	77012.4	1550.75	0.956544	0.0192613	0.975805	40.555
401.083	I70	4.31785e+06	137235	77031.2	2448.3	0.956778	0.0304094	0.987187	41.028
406.8	I71	4.31127e+06	40311.5	76913.9	719.166	0.95532	0.0089325	0.964252	40.0749
412.5	I72	4.25301e+06	30310.7	75874.4	540.748	0.942409	0.00671644	0.949126	39.4462
418.233	I73	4.23832e+06	105692	75612.5	1885.57	0.939156	0.02342	0.962576	40.0052
423.967	I74	4.2183e+06	81396.3	75255.2	1452.12	0.934718	0.0180363	0.952755	39.597
429.7	I75	4.19371e+06	59484.4	74816.6	1061.21	0.92927	0.0131809	0.942451	39.1688
435.433	I76	4.1588e+06	104625	74193.7	1866.53	0.921534	0.0231835	0.944717	39.263
441.167	I77	4.14474e+06	45401.7	73943	809.976	0.918419	0.0100604	0.928479	38.5881
446.867	I78	4.14159e+06	85572	73886.8	1526.62	0.917722	0.0189616	0.936683	38.9291
452.6	I79	4.09162e+06	84178.8	72995.2	1501.77	0.906648	0.0186529	0.9253	38.456
458.333	I80	4.03475e+06	83227.8	71980.8	1484.8	0.894047	0.0184422	0.912489	37.9236
464.067	I81	4.02831e+06	25113.6	71865.9	448.031	0.892621	0.00556484	0.898185	37.3291
469.85	I82	4.00239e+06	40013	71403.3	713.84	0.886875	0.00886635	0.895741	37.2275
475.567	I83	3.99537e+06	70214.8	71278.1	1252.65	0.88532	0.0155587	0.900879	37.441
481.317	I84	3.98324e+06	151561	71061.8	2703.88	0.882633	0.033584	0.916217	38.0785
487.067	I85	3.91142e+06	49284	69780.4	879.236	0.866718	0.0109207	0.877639	36.4751
492.8	I86	3.90093e+06	86956.3	69593.3	1551.32	0.864393	0.0192684	0.883662	36.7255
498.533	I87	3.85644e+06	77091.9	68799.6	1375.33	0.854535	0.0170825	0.871618	36.2249
504.283	I88	3.8824e+06	96433.6	69262.8	1720.39	0.860289	0.0213684	0.881657	36.6422
510.017	I89	3.82058e+06	125976	68159.8	2247.43	0.846589	0.0279145	0.874504	36.3449
515.767	I90	3.79955e+06	89720	67784.7	1600.62	0.84193	0.0198808	0.861811	35.8173
521.5	I91	3.79082e+06	67852.9	67629	1210.51	0.839995	0.0150353	0.855031	35.5355
527.217	I92	3.72069e+06	3968.13	66377.9	70.7923	0.824456	0.000879286	0.825335	34.3014
532.967	I93	3.73291e+06	90313.1	66595.8	1611.2	0.827163	0.0200122	0.847175	35.2091
538.7	I94	3.77248e+06	71928.7	67301.8	1283.22	0.835932	0.0159384	0.85187	35.4042
544.433	I95	3.66265e+06	23817.2	65342.4	424.904	0.811595	0.00527758	0.816872	33.9497
550.183	I96	3.67575e+06	45802.3	65576.1	817.123	0.814497	0.0101492	0.824646	34.2728
555.917	I97	3.6691e+06	96837.5	65457.4	1727.6	0.813023	0.0214579	0.834481	34.6815
561.667	I98	3.62912e+06	76578	64744.2	1366.17	0.804164	0.0169687	0.821133	34.1267
567.417	I99	3.62856e+06	70075.6	64734.1	1250.16	0.80404	0.0155278	0.819568	34.0617
573.117	I100	3.5863e+06	135669	63980.3	2420.36	0.794676	0.0300624	0.824739	34.2766
578.867	I101	3.57256e+06	85046.4	63735.1	1517.24	0.791631	0.0188451	0.810476	33.6838
584.567	I102	3.5449e+06	60768.4	63241.7	1084.12	0.785503	0.0134655	0.798968	33.2056
590.3	I103	3.5852e+06	63855.3	63960.7	1139.19	0.794433	0.0141495	0.808582	33.6051
596.017	I104	3.51611e+06	89972.1	62728.1	1605.12	0.779123	0.0199366	0.799059	33.2094
601.733	I105	3.5234e+06	80354.7	62858.2	1433.54	0.780739	0.0178055	0.798544	33.188
607.467	I106	3.49073e+06	71062.9	62275.4	1267.78	0.7735	0.0157466	0.789247	32.8015
613.183	I107	3.51585e+06	38059.1	62723.4	678.981	0.779064	0.00843338	0.787498	32.7288
618.95	I108	3.48613e+06	40702.2	62193.2	726.134	0.77248	0.00901906	0.781499	32.4795
624.683	I109	3.48559e+06	87430.9	62183.6	1559.78	0.77236	0.0193735	0.791734	32.9049
630.417	I110	3.46741e+06	103589	61859.2	1848.05	0.768332	0.022954	0.791286	32.8863
636.133	I111	3.43501e+06	38284.5	61281.2	683.004	0.761152	0.00848334	0.769635	31.9865
641.9	I112	3.41565e+06	29089	60935.8	518.953	0.756862	0.00644573	0.763307	31.7235
647.65	I113	3.33454e+06	187888	59488.8	3351.96	0.738889	0.0416335	0.780523	32.439
653.383	I114	3.38405e+06	104089	60372.1	1856.96	0.74986	0.0230647	0.772925	32.1232
659.133	I115	3.39556e+06	56851	60577.4	1014.23	0.75241	0.0125974	0.765007	31.7941
664.867	I116	3.34548e+06	16721.4	59684	298.313	0.741313	0.00370524	0.745018	30.9634
670.583	I117	3.378e+06	63433.5	60264.2	1131.67	0.74852	0.014056	0.762576	31.6931
676.317	I118	3.31308e+06	54696.2	59105.9	975.791	0.734133	0.01212	0.746253	31.0147
682.067	I119	3.32192e+06	44411.8	59263.8	792.315	0.736094	0.00984106	0.745935	31.0015
687.783	I120	3.32594e+06	49893.8	59335.4	890.115	0.736984	0.0110558	0.748039	31.0889
693.483	I121	3.28538e+06	65958.3	58611.9	1176.71	0.727997	0.0146155	0.742613	30.8634
699.217	I122	3.30664e+06	97288	58991	1735.64	0.732707	0.0215577	0.754264	31.3476
704.933	I123	3.2759e+06	83479.8	58442.8	1489.3	0.725897	0.018498	0.744395	30.9375
710.7	I124	3.24473e+06	82868.7	57886.6	1478.39	0.718989	0.0183626	0.737352	30.6447
716.433	I125	3.22505e+06	78339.6	57535.4	1397.59	0.714627	0.017359	0.731986	30.4218
722.167	I126	3.22167e+06	68041.2	57475.2	1213.87	0.713879	0.015077	0.728956	30.2958
727.883	I127	3.22626e+06	66972.5	57557.1	1194.8	0.714897	0.0148402	0.729737	30.3283
733.617	I128	3.23491e+06	66815.5	57711.4	1192	0.716813	0.0148054	0.731618	30.4065
739.333	I129	3.21314e+06	38902.1	57323.1	694.021	0.71199	0.00862019	0.72061	29.9489
745.05	I130	3.19958e+06	73788.9	57081.2	1316.41	0.708985	0.0163506	0.725335	30.1453
750.8	I131	3.18433e+06	62069.5	56809.1	1107.33	0.705606	0.0137538	0.71936	29.897
756.533	I132	3.19971e+06	29688.2	57083.4	529.643	0.709013	0.00657851	0.715591	29.7404
762.25	I133	3.17166e+06	46437.1	56583	828.446	0.702797	0.0102898	0.713087	29.6363
767.967	I134	3.15348e+06	50603.6	56258.6	902.777	0.698768	0.0112131	0.709981	29.5072
773.683	I135	3.13353e+06	89940.9	55902.8	1604.56	0.694348	0.0199297	0.714278	29.6858
time [min]:	Peak name
0.0166667	I0
5.88333	I1
11.6167	I2
17.3667	I3
23.0833	I4
28.8167	I5
34.5333	I6
40.25	I7
45.95	I8
51.6833	I9
57.4167	I10
63.15	I11
68.8833	I12
74.6167	I13
80.3667	I14
86.1	I15
91.8167	I16
97.55	I17
103.267	I18
109	I19
114.733	I20
120.467	I21
126.183	I22
131.917	I23
137.633	I24
143.383	I25
149.1	I26
154.85	I27
160.567	I28
166.317	I29
172.083	I30
177.833	I31
183.567	I32
189.3	I33
195.033	I34
200.75	I35
206.467	I36
212.2	I37
217.95	I38
223.683	I39
229.433	I40
235.167	I41
240.883	I42
246.617	I43
252.35	I44
258.083	I45
263.783	I46
269.5	I47
275.217	I48
280.917	I49
286.65	I50
292.383	I51
298.1	I52
303.817	I53
309.533	I54
315.25	I55
321	I56
326.717	I57
332.45	I58
338.183	I59
343.917	I60
349.633	I61
355.367	I62
361.067	I63
366.8	I64
372.517	I65
378.217	I66
383.933	I67
389.667	I68
395.367	I69
401.083	I70
406.8	I71
412.5	I72
418.233	I73
423.967	I74
429.7	I75
435.433	I76
441.167	I77
446.867	I78
452.6	I79
458.333	I80
464.067	I81
469.85	I82
475.567	I83
481.317	I84
487.067	I85
492.8	I86
498.533	I87
504.283	I88
510.017	I89
515.767	I90
521.5	I91
527.217	I92
532.967	I93
538.7	I94
544.433	I95
550.183	I96
555.917	I97
561.667	I98
567.417	I99
573.117	I100
578.867	I101
584.567	I102
590.3	I103
596.017	I104
601.733	I105
607.467	I106
613.183	I107
618.95	I108
624.683	I109
630.417	I110
636.133	I111
641.9	I112
647.65	I113
653.383	I114
659.133	I115
664.867	I116
670.583	I117
676.317	I118
682.067	I119
687.783	I120
693.483	I121
699.217	I122
704.933	I123
710.7	I124
716.433	I125
722.167	I126
727.883	I127
733.617	I128
739.333	I129
745.05	I130
750.8	I131
756.533	I132
762.25	I133
767.967	I134
773.683	I135
time [min]:	Peak name
0.0166667	I0
5.88333	I1
11.6167	I2
17.3667	I3
23.0833	I4
28.8167	I5
34.5333	I6
40.25	I7
45.95	I8
51.6833	I9
57.4167	I10
63.15	I11
68.8833	I12
74.6167	I13
80.3667	I14
86.1	I15
91.8167	I16
97.55	I17
103.267	I18
109	I19
114.733	I20
120.467	I21
126.183	I22
131.917	I23
137.633	I24
143.383	I25
149.1	I26
154.85	I27
160.567	I28
166.317	I29
172.083	I30
177.833	I31
183.567	I32
189.3	I33
195.033	I34
200.75	I35
206.467	I36
212.2	I37
217.95	I38
223.683	I39
229.433	I40
235.167	I41
240.883	I42
246.617	I43
252.35	I44
258.083	I45
263.783	I46
269.5	I47
275.217	I48
280.917	I49
286.65	I50
292.383	I51
298.1	I52
303.817	I53
309.533	I54
315.25	I55
321	I56
326.717	I57
332.45	I58
338.183	I59
343.917	I60
349.633	I61
355.367	I62
361.067	I63
366.8	I64
372.517	I65
378.217	I66
383.933	I67
389.667	I68
395.367	I69
401.083	I70
406.8	I71
412.5	I72
418.233	I73
423.967	I74
429.7	I75
435.433	I76
441.167	I77
446.867	I78
452.6	I79
458.333	I80
464.067	I81
469.85	I82
475.567	I83
481.317	I84
487.067	I85
492.8	I86
498.533	I87
504.283	I88
510.017	I89
515.767	I90
521.5	I91
527.217	I92
532.967	I93
538.7	I94
544.433	I95
550.183	I96
555.917	I97
561.667	I98
567.417	I99
573.117	I100
578.867	I101
584.567	I102
590.3	I103
596.017	I104
601.733	I105
607.467	I106
613.183	I107
618.95	I108
624.683	I109
630.417	I110
636.133	I111
641.9	I112
647.65	I113
653.383	I114
659.133	I115
664.867	I116
670.583	I117
676.317	I118
682.067	I119
687.783	I120
693.483	I121
699.217	I122
704.933	I123
710.7	I124
716.433	I125
722.167	I126
727.883	I127
733.617	I128
739.333	I129
745.05	I130
750.8	I131
756.533	I132
762.25	I133
767.967	I134
773.683	I135
time [min]:	Peak name
0.0166667	I0
5.88333	I1
11.6167	I2
17.3667	I3
23.0833	I4
28.8167	I5
34.5333	I6
40.25	I7
45.95	I8
51.6833	I9
57.4167	I10
63.15	I11
68.8833	I12
74.6167	I13
80.3667	I14
86.1	I15
91.8167	I16
97.55	I17
103.267	I18
109	I19
114.733	I20
120.467	I21
126.183	I22
131.917	I23
137.633	I24
143.383	I25
149.1	I26
154.85	I27
160.567	I28
166.317	I29
172.083	I30
177.833	I31
183.567	I32
189.3	I33
195.033	I34
200.75	I35
206.467	I36
212.2	I37
217.95	I38
223.683	I39
229.433	I40
235.167	I41
240.883	I42
246.617	I43
252.35	I44
258.083	I45
263.783	I46
269.5	I47
275.217	I48
280.917	I49
286.65	I50
292.383	I51
298.1	I52
303.817	I53
309.533	I54
315.25	I55
321	I56
326.717	I57
332.45	I58
338.183	I59
343.917	I60
349.633	I61
355.367	I62
361.067	I63
366.8	I64
372.517	I65
378.217	I66
383.933	I67
389.667	I68
395.367	I69
401.083	I70
406.8	I71
412.5	I72
418.233	I73
423.967	I74
429.7	I75
435.433	I76
441.167	I77
446.867	I78
452.6	I79
458.333	I80
464.067	I81
469.85	I82
475.567	I83
481.317	I84
487.067	I85
492.8	I86
498.533	I87
504.283	I88
510.017	I89
515.767	I90
521.5	I91
527.217	I92
532.967	I93
538.7	I94
544.433	I95
550.183	I96
555.917	I97
561.667	I98
567.417	I99
573.117	I100
578.867	I101
584.567	I102
590.3	I103
596.017	I104
601.733	I105
607.467	I106
613.183	I107
618.95	I108
624.683	I109
630.417	I110
636.133	I111
641.9	I112
647.65	I113
653.383	I114
659.133	I115
664.867	I116
670.583	I117
676.317	I118
682.067	I119
687.783	I120
693.483	I121
699.217	I122
704.933	I123
710.7	I124
716.433	I125
722.167	I126
727.883	I127
733.617	I128
739.333	I129
745.05	I130
750.8	I131
756.533	I132
762.25	I133
767.967	I134
773.683	I135
time [min]:	Peak name
0.0166667	I0
5.88333	I1
11.6167	I2
17.3667	I3
23.0833	I4
28.8167	I5
34.5333	I6
40.25	I7
45.95	I8
51.6833	I9
57.4167	I10
63.15	I11
68.8833	I12
74.6167	I13
80.3667	I14
86.1	I15
91.8167	I16
97.55	I17
103.267	I18
109	I19
114.733	I20
120.467	I21
126.183	I22
131.917	I23
137.633	I24
143.383	I25
149.1	I26
154.85	I27
160.567	I28
166.317	I29
172.083	I30
177.833	I31
183.567	I32
189.3	I33
195.033	I34
200.75	I35
206.467	I36
212.2	I37
217.95	I38
223.683	I39
229.433	I40
235.167	I41
240.883	I42
246.617	I43
252.35	I44
258.083	I45
263.783	I46
269.5	I47
275.217	I48
280.917	I49
286.65	I50
292.383	I51
298.1	I52
303.817	I53
309.533	I54
315.25	I55
321	I56
326.717	I57
332.45	I58
338.183	I59
343.917	I60
349.633	I61
355.367	I62
361.067	I63
366.8	I64
372.517	I65
378.217	I66
383.933	I67
389.667	I68
395.367	I69
401.083	I70
406.8	I71
412.5	I72
418.233	I73
423.967	I74
429.7	I75
435.433	I76
441.167	I77
446.867	I78
452.6	I79
458.333	I80
464.067	I81
469.85	I82
475.567	I83
481.317	I84
487.067	I85
492.8	I86
498.533	I87
504.283	I88
510.017	I89
515.767	I90
521.5	I91
527.217	I92
532.967	I93
538.7	I94
544.433	I95
550.183	I96
555.917	I97
561.667	I98
567.417	I99
573.117	I100
578.867	I101
584.567	I102
590.3	I103
596.017	I104
601.733	I105
607.467	I106
613.183	I107
618.95	I108
624.683	I109
630.417	I110
636.133	I111
641.9	I112
647.65	I113
653.383	I114
659.133	I115
664.867	I116
670.583	I117
676.317	I118
682.067	I119
687.783	I120
693.483	I121
699.217	I122
704.933	I123
710.7	I124
716.433	I125
722.167	I126
727.883	I127
733.617	I128
739.333	I129
745.05	I130
750.8	I131
756.533	I132
762.25	I133
767.967	I134
773.683	I135
time [min]:	Peak name
0.0166667	I0
5.88333	I1
11.6167	I2
17.3667	I3
23.0833	I4
28.8167	I5
34.5333	I6
40.25	I7
45.95	I8
51.6833	I9
57.4167	I10
63.15	I11
68.8833	I12
74.6167	I13
80.3667	I14
86.1	I15
91.8167	I16
97.55	I17
103.267	I18
109	I19
114.733	I20
120.467	I21
126.183	I22
131.917	I23
137.633	I24
143.383	I25
149.1	I26
154.85	I27
160.567	I28
166.317	I29
172.083	I30
177.833	I31
183.567	I32
189.3	I33
195.033	I34
200.75	I35
206.467	I36
212.2	I37
217.95	I38
223.683	I39
229.433	I40
235.167	I41
240.883	I42
246.617	I43
252.35	I44
258.083	I45
263.783	I46
269.5	I47
275.217	I48
280.917	I49
286.65	I50
292.383	I51
298.1	I52
303.817	I53
309.533	I54
315.25	I55
321	I56
326.717	I57
332.45	I58
338.183	I59
343.917	I60
349.633	I61
355.367	I62
361.067	I63
366.8	I64
372.517	I65
378.217	I66
383.933	I67
389.667	I68
395.367	I69
401.083	I70
406.8	I71
412.5	I72
418.233	I73
423.967	I74
429.7	I75
435.433	I76
441.167	I77
446.867	I78
452.6	I79
458.333	I80
464.067	I81
469.85	I82
475.567	I83
481.317	I84
487.067	I85
492.8	I86
498.533	I87
504.283	I88
510.017	I89
515.767	I90
521.5	I91
527.217	I92
532.967	I93
538.7	I94
544.433	I95
550.183	I96
555.917	I97
561.667	I98
567.417	I99
573.117	I100
578.867	I101
584.567	I102
590.3	I103
596.017	I104
601.733	I105
607.467	I106
613.183	I107
618.95	I108
624.683	I109
630.417	I110
636.133	I111
641.9	I112
647.65	I113
653.383	I114
659.133	I115
664.867	I116
670.583	I117
676.317	I118
682.067	I119
687.783	I120
693.483	I121
699.217	I122
704.933	I123
710.7	I124
716.433	I125
722.167	I126
727.883	I127
733.617	I128
739.333	I129
745.05	I130
750.8	I131
756.533	I132
762.25	I133
767.967	I134
773.683	I135
time [min]:	Peak name
0.0166667	I0
5.88333	I1
11.6167	I2
17.3667	I3
23.0833	I4
28.8167	I5
34.5333	I6
40.25	I7
45.95	I8
51.6833	I9
57.4167	I10
63.15	I11
68.8833	I12
74.6167	I13
80.3667	I14
86.1	I15
91.8167	I16
97.55	I17
103.267	I18
109	I19
114.733	I20
120.467	I21
126.183	I22
131.917	I23
137.633	I24
143.383	I25
149.1	I26
154.85	I27
160.567	I28
166.317	I29
172.083	I30
177.833	I31
183.567	I32
189.3	I33
195.033	I34
200.75	I35
206.467	I36
212.2	I37
217.95	I38
223.683	I39
229.433	I40
235.167	I41
240.883	I42
246.617	I43
252.35	I44
258.083	I45
263.783	I46
269.5	I47
275.217	I48
280.917	I49
286.65	I50
292.383	I51
298.1	I52
303.817	I53
309.533	I54
315.25	I55
321	I56
326.717	I57
332.45	I58
338.183	I59
343.917	I60
349.633	I61
355.367	I62
361.067	I63
366.8	I64
372.517	I65
378.217	I66
383.933	I67
389.667	I68
395.367	I69
401.083	I70
406.8	I71
412.5	I72
418.233	I73
423.967	I74
429.7	I75
435.433	I76
441.167	I77
446.867	I78
452.6	I79
458.333	I80
464.067	I81
469.85	I82
475.567	I83
481.317	I84
487.067	I85
492.8	I86
498.533	I87
504.283	I88
510.017	I89
515.767	I90
521.5	I91
527.217	I92
532.967	I93
538.7	I94
544.433	I95
550.183	I96
555.917	I97
561.667	I98
567.417	I99
573.117	I100
578.867	I101
584.567	I102
590.3	I103
596.017	I104
601.733	I105
607.467	I106
613.183	I107
618.95	I108
624.683	I109
630.417	I110
636.133	I111
641.9	I112
647.65	I113
653.383	I114
659.133	I115
664.867	I116
670.583	I117
676.317	I118
682.067	I119
687.783	I120
693.483	I121
699.217	I122
704.933	I123
710.7	I124
716.433	I125
722.167	I126
727.883	I127
733.617	I128
739.333	I129
745.05	I130
750.8	I131
756.533	I132
762.25	I133
767.967	I134
773.683	I135
time [min]:	Peak name
0.0166667	I0
5.88333	I1
11.6167	I2
17.3667	I3
23.0833	I4
28.8167	I5
34.5333	I6
40.25	I7
45.95	I8
51.6833	I9
57.4167	I10
63.15	I11
68.8833	I12
74.6167	I13
80.3667	I14
86.1	I15
91.8167	I16
97.55	I17
103.267	I18
109	I19
114.733	I20
120.467	I21
126.183	I22
131.917	I23
137.633	I24
143.383	I25
149.1	I26
154.85	I27
160.567	I28
166.317	I29
172.083	I30
177.833	I31
183.567	I32
189.3	I33
195.033	I34
200.75	I35
206.467	I36
212.2	I37
217.95	I38
223.683	I39
229.433	I40
235.167	I41
240.883	I42
246.617	I43
252.35	I44
258.083	I45
263.783	I46
269.5	I47
275.217	I48
280.917	I49
286.65	I50
292.383	I51
298.1	I52
303.817	I53
309.533	I54
315.25	I55
321	I56
326.717	I57
332.45	I58
338.183	I59
343.917	I60
349.633	I61
355.367	I62
361.067	I63
366.8	I64
372.517	I65
378.217	I66
383.933	I67
389.667	I68
395.367	I69
401.083	I70
406.8	I71
412.5	I72
418.233	I73
423.967	I74
429.7	I75
435.433	I76
441.167	I77
446.867	I78
452.6	I79
458.333	I80
464.067	I81
469.85	I82
475.567	I83
481.317	I84
487.067	I85
492.8	I86
498.533	I87
504.283	I88
510.017	I89
515.767	I90
521.5	I91
527.217	I92
532.967	I93
538.7	I94
544.433	I95
550.183	I96
555.917	I97
561.667	I98
567.417	I99
573.117	I100
578.867	I101
584.567	I102
590.3	I103
596.017	I104
601.733	I105
607.467	I106
613.183	I107
618.95	I108
624.683	I109
630.417	I110
636.133	I111
641.9	I112
647.65	I113
653.383	I114
659.133	I115
664.867	I116
670.583	I117
676.317	I118
682.067	I119
687.783	I120
693.483	I121
699.217	I122
704.933	I123
710.7	I124
716.433	I125
722.167	I126
727.883	I127
733.617	I128
739.333	I129
745.05	I130
750.8	I131
756.533	I132
762.25	I133
767.967	I134
773.683	I135
time [min]:	Peak name
0.0166667	I0
5.88333	I1
11.6167	I2
17.3667	I3
23.0833	I4
28.8167	I5
34.5333	I6
40.25	I7
45.95	I8
51.6833	I9
57.4167	I10
63.15	I11
68.8833	I12
74.6167	I13
80.3667	I14
86.1	I15
91.8167	I16
97.55	I17
103.267	I18
109	I19
114.733	I20
120.467	I21
126.183	I22
131.917	I23
137.633	I24
143.383	I25
149.1	I26
154.85	I27
160.567	I28
166.317	I29
172.083	I30
177.833	I31
183.567	I32
189.3	I33
195.033	I34
200.75	I35
206.467	I36
212.2	I37
217.95	I38
223.683	I39
229.433	I40
235.167	I41
240.883	I42
246.617	I43
252.35	I44
258.083	I45
263.783	I46
269.5	I47
275.217	I48
280.917	I49
286.65	I50
292.383	I51
298.1	I52
303.817	I53
309.533	I54
315.25	I55
321	I56
326.717	I57
332.45	I58
338.183	I59
343.917	I60
349.633	I61
355.367	I62
361.067	I63
366.8	I64
372.517	I65
378.217	I66
383.933	I67
389.667	I68
395.367	I69
401.083	I70
406.8	I71
412.5	I72
418.233	I73
423.967	I74
429.7	I75
435.433	I76
441.167	I77
446.867	I78
452.6	I79
458.333	I80
464.067	I81
469.85	I82
475.567	I83
481.317	I84
487.067	I85
492.8	I86
498.533	I87
504.283	I88
510.017	I89
515.767	I90
521.5	I91
527.217	I92
532.967	I93
538.7	I94
544.433	I95
550.183	I96
555.917	I97
561.667	I98
567.417	I99
573.117	I100
578.867	I101
584.567	I102
590.3	I103
596.017	I104
601.733	I105
607.467	I106
613.183	I107
618.95	I108
624.683	I109
630.417	I110
636.133	I111
641.9	I112
647.65	I113
653.383	I114
659.133	I115
664.867	I116
670.583	I117
676.317	I118
682.067	I119
687.783	I120
693.483	I121
699.217	I122
704.933	I123
710.7	I124
716.433	I125
722.167	I126
727.883	I127
733.617	I128
739.333	I129
745.05	I130
750.8	I131
756.533	I132
762.25	I133
767.967	I134
773.683	I135
time [min]:	Peak name
0.0166667	I0
5.88333	I1
11.6167	I2
17.3667	I3
23.0833	I4
28.8167	I5
34.5333	I6
40.25	I7
45.95	I8
51.6833	I9
57.4167	I10
63.15	I11
68.8833	I12
74.6167	I13
80.3667	I14
86.1	I15
91.8167	I16
97.55	I17
103.267	I18
109	I19
114.733	I20
120.467	I21
126.183	I22
131.917	I23
137.633	I24
143.383	I25
149.1	I26
154.85	I27
160.567	I28
166.317	I29
172.083	I30
177.833	I31
183.567	I32
189.3	I33
195.033	I34
200.75	I35
206.467	I36
212.2	I37
217.95	I38
223.683	I39
229.433	I40
235.167	I41
240.883	I42
246.617	I43
252.35	I44
258.083	I45
263.783	I46
269.5	I47
275.217	I48
280.917	I49
286.65	I50
292.383	I51
298.1	I52
303.817	I53
309.533	I54
315.25	I55
321	I56
326.717	I57
332.45	I58
338.183	I59
343.917	I60
349.633	I61
355.367	I62
361.067	I63
366.8	I64
372.517	I65
378.217	I66
383.933	I67
389.667	I68
395.367	I69
401.083	I70
406.8	I71
412.5	I72
418.233	I73
423.967	I74
429.7	I75
435.433	I76
441.167	I77
446.867	I78
452.6	I79
458.333	I80
464.067	I81
469.85	I82
475.567	I83
481.317	I84
487.067	I85
492.8	I86
498.533	I87
504.283	I88
510.017	I89
515.767	I90
521.5	I91
527.217	I92
532.967	I93
538.7	I94
544.433	I95
550.183	I96
555.917	I97
561.667	I98
567.417	I99
573.117	I100
578.867	I101
584.567	I102
590.3	I103
596.017	I104
601.733	I105
607.467	I106
613.183	I107
618.95	I108
624.683	I109
630.417	I110
636.133	I111
641.9	I112
647.65	I113
653.383	I114
659.133	I115
664.867	I116
670.583	I117
676.317	I118
682.067	I119
687.783	I120
693.483	I121
699.217	I122
704.933	I123
710.7	I124
716.433	I125
722.167	I126
727.883	I127
733.617	I128
739.333	I129
745.05	I130
750.8	I131
756.533	I132
762.25	I133
767.967	I134
773.683	I135
time [min]:	Peak name
0.0166667	I0
5.88333	I1
11.6167	I2
17.3667	I3
23.0833	I4
28.8167	I5
34.5333	I6
40.25	I7
45.95	I8
51.6833	I9
57.4167	I10
63.15	I11
68.8833	I12
74.6167	I13
80.3667	I14
86.1	I15
91.8167	I16
97.55	I17
103.267	I18
109	I19
114.733	I20
120.467	I21
126.183	I22
131.917	I23
137.633	I24
143.383	I25
149.1	I26
154.85	I27
160.567	I28
166.317	I29
172.083	I30
177.833	I31
183.567	I32
189.3	I33
195.033	I34
200.75	I35
206.467	I36
212.2	I37
217.95	I38
223.683	I39
229.433	I40
235.167	I41
240.883	I42
246.617	I43
252.35	I44
258.083	I45
263.783	I46
269.5	I47
275.217	I48
280.917	I49
286.65	I50
292.383	I51
298.1	I52
303.817	I53
309.533	I54
315.25	I55
321	I56
326.717	I57
332.45	I58
338.183	I59
343.917	I60
349.633	I61
355.367	I62
361.067	I63
366.8	I64
372.517	I65
378.217	I66
383.933	I67
389.667	I68
395.367	I69
401.083	I70
406.8	I71
412.5	I72
418.233	I73
423.967	I74
429.7	I75
435.433	I76
441.167	I77
446.867	I78
452.6	I79
458.333	I80
464.067	I81
469.85	I82
475.567	I83
481.317	I84
487.067	I85
492.8	I86
498.533	I87
504.283	I88
510.017	I89
515.767	I90
521.5	I91
527.217	I92
532.967	I93
538.7	I94
544.433	I95
550.183	I96
555.917	I97
561.667	I98
567.417	I99
573.117	I100
578.867	I101
584.567	I102
590.3	I103
596.017	I104
601.733	I105
607.467	I106
613.183	I107
618.95	I108
624.683	I109
630.417	I110
636.133	I111
641.9	I112
647.65	I113
653.383	I114
659.133	I115
664.867	I116
670.583	I117
676.317	I118
682.067	I119
687.783	I120
693.483	I121
699.217	I122
704.933	I123
710.7	I124
716.433	I125
722.167	I126
727.883	I127
733.617	I128
739.333	I129
745.05	I130
750.8	I131
756.533	I132
762.25	I133
767.967	I134
773.683	I135
time [min]:	Peak name
0.0166667	I0
5.88333	I1
11.6167	I2
17.3667	I3
23.0833	I4
28.8167	I5
34.5333	I6
40.25	I7
45.95	I8
51.6833	I9
57.4167	I10
63.15	I11
68.8833	I12
74.6167	I13
80.3667	I14
86.1	I15
91.8167	I16
97.55	I17
103.267	I18
109	I19
114.733	I20
120.467	I21
126.183	I22
131.917	I23
137.633	I24
143.383	I25
149.1	I26
154.85	I27
160.567	I28
166.317	I29
172.083	I30
177.833	I31
183.567	I32
189.3	I33
195.033	I34
200.75	I35
206.467	I36
212.2	I37
217.95	I38
223.683	I39
229.433	I40
235.167	I41
240.883	I42
246.617	I43
252.35	I44
258.083	I45
263.783	I46
269.5	I47
275.217	I48
280.917	I49
286.65	I50
292.383	I51
298.1	I52
303.817	I53
309.533	I54
315.25	I55
321	I56
326.717	I57
332.45	I58
338.183	I59
343.917	I60
349.633	I61
355.367	I62
361.067	I63
366.8	I64
372.517	I65
378.217	I66
383.933	I67
389.667	I68
395.367	I69
401.083	I70
406.8	I71
412.5	I72
418.233	I73
423.967	I74
429.7	I75
435.433	I76
441.167	I77
446.867	I78
452.6	I79
458.333	I80
464.067	I81
469.85	I82
475.567	I83
481.317	I84
487.067	I85
492.8	I86
498.533	I87
504.283	I88
510.017	I89
515.767	I90
521.5	I91
527.217	I92
532.967	I93
538.7	I94
544.433	I95
550.183	I96
555.917	I97
561.667	I98
567.417	I99
573.117	I100
578.867	I101
584.567	I102
590.3	I103
596.017	I104
601.733	I105
607.467	I106
613.183	I107
618.95	I108
624.683	I109
630.417	I110
636.133	I111
641.9	I112
647.65	I113
653.383	I114
659.133	I115
664.867	I116
670.583	I117
676.317	I118
682.067	I119
687.783	I120
693.483	I121
699.217	I122
704.933	I123
710.7	I124
716.433	I125
722.167	I126
727.883	I127
733.617	I128
739.333	I129
745.05	I130
750.8	I131
756.533	I132
762.25	I133
767.967	I134
773.683	I135
time [min]:	Peak name
0.0166667	I0
5.88333	I1
11.6167	I2
17.3667	I3
23.0833	I4
28.8167	I5
34.5333	I6
40.25	I7
45.95	I8
51.6833	I9
57.4167	I10
63.15	I11
68.8833	I12
74.6167	I13
80.3667	I14
86.1	I15
91.8167	I16
97.55	I17
103.267	I18
109	I19
114.733	I20
120.467	I21
126.183	I22
131.917	I23
137.633	I24
143.383	I25
149.1	I26
154.85	I27
160.567	I28
166.317	I29
172.083	I30
177.833	I31
183.567	I32
189.3	I33
195.033	I34
200.75	I35
206.467	I36
212.2	I37
217.95	I38
223.683	I39
229.433	I40
235.167	I41
240.883	I42
246.617	I43
252.35	I44
258.083	I45
263.783	I46
269.5	I47
275.217	I48
280.917	I49
286.65	I50
292.383	I51
298.1	I52
303.817	I53
309.533	I54
315.25	I55
321	I56
326.717	I57
332.45	I58
338.183	I59
343.917	I60
349.633	I61
355.367	I62
361.067	I63
366.8	I64
372.517	I65
378.217	I66
383.933	I67
389.667	I68
395.367	I69
401.083	I70
406.8	I71
412.5	I72
418.233	I73
423.967	I74
429.7	I75
435.433	I76
441.167	I77
446.867	I78
452.6	I79
458.333	I80
464.067	I81
469.85	I82
475.567	I83
481.317	I84
487.067	I85
492.8	I86
498.533	I87
504.283	I88
510.017	I89
515.767	I90
521.5	I91
527.217	I92
532.967	I93
538.7	I94
544.433	I95
550.183	I96
555.917	I97
561.667	I98
567.417	I99
573.117	I100
578.867	I101
584.567	I102
590.3	I103
596.017	I104
601.733	I105
607.467	I106
613.183	I107
618.95	I108
624.683	I109
630.417	I110
636.133	I111
641.9	I112
647.65	I113
653.383	I114
659.133	I115
664.867	I116
670.583	I117
676.317	I118
682.067	I119
687.783	I120
693.483	I121
699.217	I122
704.933	I123
710.7	I124
716.433	I125
722.167	I126
727.883	I127
733.617	I128
739.333	I129
745.05	I130
750.8	I131
756.533	I132
762.25	I133
767.967	I134
773.683	I135
time [min]:	Peak name
0.0166667	I0
5.88333	I1
11.6167	I2
17.3667	I3
23.0833	I4
28.8167	I5
34.5333	I6
40.25	I7
45.95	I8
51.6833	I9
57.4167	I10
63.15	I11
68.8833	I12
74.6167	I13
80.3667	I14
86.1	I15
91.8167	I16
97.55	I17
103.267	I18
109	I19
114.733	I20
120.467	I21
126.183	I22
131.917	I23
137.633	I24
143.383	I25
149.1	I26
154.85	I27
160.567	I28
166.317	I29
172.083	I30
177.833	I31
183.567	I32
189.3	I33
195.033	I34
200.75	I35
206.467	I36
212.2	I37
217.95	I38
223.683	I39
229.433	I40
235.167	I41
240.883	I42
246.617	I43
252.35	I44
258.083	I45
263.783	I46
269.5	I47
275.217	I48
280.917	I49
286.65	I50
292.383	I51
298.1	I52
303.817	I53
309.533	I54
315.25	I55
321	I56
326.717	I57
332.45	I58
338.183	I59
343.917	I60
349.633	I61
355.367	I62
361.067	I63
366.8	I64
372.517	I65
378.217	I66
383.933	I67
389.667	I68
395.367	I69
401.083	I70
406.8	I71
412.5	I72
418.233	I73
423.967	I74
429.7	I75
435.433	I76
441.167	I77
446.867	I78
452.6	I79
458.333	I80
464.067	I81
469.85	I82
475.567	I83
481.317	I84
487.067	I85
492.8	I86
498.533	I87
504.283	I88
510.017	I89
515.767	I90
521.5	I91
527.217	I92
532.967	I93
538.7	I94
544.433	I95
550.183	I96
555.917	I97
561.667	I98
567.417	I99
573.117	I100
578.867	I101
584.567	I102
590.3	I103
596.017	I104
601.733	I105
607.467	I106
613.183	I107
618.95	I108
624.683	I109
630.417	I110
636.133	I111
641.9	I112
647.65	I113
653.383	I114
659.133	I115
664.867	I116
670.583	I117
676.317	I118
682.067	I119
687.783	I120
693.483	I121
699.217	I122
704.933	I123
710.7	I124
716.433	I125
722.167	I126
727.883	I127
733.617	I128
739.333	I129
745.05	I130
750.8	I131
756.533	I132
762.25	I133
767.967	I134
773.683	I135
time [min]:	Peak name
0.0166667	I0
5.88333	I1
11.6167	I2
17.3667	I3
23.0833	I4
28.8167	I5
34.5333	I6
40.25	I7
45.95	I8
51.6833	I9
57.4167	I10
63.15	I11
68.8833	I12
74.6167	I13
80.3667	I14
86.1	I15
91.8167	I16
97.55	I17
103.267	I18
109	I19
114.733	I20
120.467	I21
126.183	I22
131.917	I23
137.633	I24
143.383	I25
149.1	I26
154.85	I27
160.567	I28
166.317	I29
172.083	I30
177.833	I31
183.567	I32
189.3	I33
195.033	I34
200.75	I35
206.467	I36
212.2	I37
217.95	I38
223.683	I39
229.433	I40
235.167	I41
240.883	I42
246.617	I43
252.35	I44
258.083	I45
263.783	I46
269.5	I47
275.217	I48
280.917	I49
286.65	I50
292.383	I51
298.1	I52
303.817	I53
309.533	I54
315.25	I55
321	I56
326.717	I57
332.45	I58
338.183	I59
343.917	I60
349.633	I61
355.367	I62
361.067	I63
366.8	I64
372.517	I65
378.217	I66
383.933	I67
389.667	I68
395.367	I69
401.083	I70
406.8	I71
412.5	I72
418.233	I73
423.967	I74
429.7	I75
435.433	I76
441.167	I77
446.867	I78
452.6	I79
458.333	I80
[truncated: 1,046,457+ more rows]

## Sheet: Phosphorus
time [min]:	Peak name	internal standard #1	OPPh3	PPh3	A/B	C	[PPh3]	[OPPh3]	[A/B]	[C]	V	total phosphorus		when phosphorus source is PPH3
0.0166667	I0	1.16663e+08	333156	3.6545e+07	1.30698e+06		9.34921	0.0402995	0.0449712	0	0	9.47946
5.75	I1	1.18236e+08	243318	3.53242e+07	2.2368e+06		8.91666	0.0290408	0.0759408	0	0	9.09758		INTERNAL REFERENCE (CF SPECTRUM)			FLOW CALIBRATION
11.5167	I2	1.1876e+08	416526	3.81746e+07	1.2966e+07		9.59367	0.0494945	0.438262	0	0	10.5197		Triphenylphosphine mass (g)	0.0796			Triphenylphosphosphate	Peak 1	Peak 2	Peak 3
17.2333	I3	1.18225e+08	886636	4.09746e+07	2.23002e+07		10.344	0.105833	0.757176	0	0	11.9641		Triphenylphosphine n (moles)	0.000303481		0 mL/min	5.70293e+07	7.98011e+07	3.48921e+06	1.26911e+07	2720052
22.9833	I4	1.18505e+08	1.99757e+06	42393905	2.70848e+07		10.6769	0.237875	0.917457	0	0	12.7497		Reaction Volume (L)	0.0224		4 mL/min	1.74532e+07	1.0222e+07	945257	6.42578e+06	1.02344e+06
28.6833	I5	1.20164e+08	2.60297e+06	4.44256e+07	3.18456e+07		11.0342	0.305689	1.06383	0	0	13.4675		Triphenylphosphine concentration (M)	0.0135483		CF	3.26756	7.80679	3.69128	2.1	3.32
34.4167	I6	1.1973e+08	2.94595e+06	46966508	3.43223e+07		11.7076	0.347223	1.15073	0	0	14.3563		Triphenylphosphine concentration (mM)	13.5483			internal standard			#	acyl cpmplex
40.1333	I7	1.19604e+08	3.30597e+06	46037169	3.69774e+07		11.488	0.390067	1.24105	0	0	14.3602
45.8333	I8	1.1954e+08	3.40904e+06	4.7464e+07	3.93949e+07		11.8504	0.402443	1.32289	0	0	14.8986
51.5667	I9	120956908	4.8342e+06	4.45586e+07	3.95556e+07		10.9947	0.564001	1.31273	0	0	14.1841		[Triphenylphosphate] ACTUAL EXPERIMENT
57.3167	I10	1.2114e+08	4.5371e+06	4.47281e+07	4.01739e+07		11.0198	0.528537	1.33123	0	0	14.2108		Triphenylphosphate mass (g)	0.0913
63.0167	I11	1.2128e+08	4.87237e+06	4.28877e+07	4.16781e+07		10.5541	0.566937	1.37948	0	0	13.88		Triphenylphosphate n (moles)	0.000279821
68.7667	I12	1.20565e+08	4.86175e+06	4.43312e+07	4.2553e+07		10.9742	0.569061	1.4168	0	0	14.3768		Reaction Volume (L)	0.0224
74.5167	I13	1.21403e+08	4.60753e+06	4.35868e+07	4.1052e+07		10.7154	0.535581	1.35739	0	0	13.9658		Triphenylphosphate concentration (M)	0.012492
80.25	I14	1.20578e+08	4.72906e+06	4.39451e+07	4.03798e+07		10.8774	0.553469	1.3443	0	0	14.1195		Triphenylphosphate concentration (mM)	12.492
85.9667	I15	1.21547e+08	4.85306e+06	4.24355e+07	4.13955e+07		10.42	0.563452	1.36712	0	0	13.7176
91.7	I16	1.20185e+08	4.75722e+06	4.20578e+07	4.12581e+07		10.4443	0.558584	1.37803	0	0	13.7589
97.4333	I17	1.20358e+08	5.50724e+06	4.16869e+07	4.17982e+07		10.3373	0.64572	1.39406	0	0	13.7711
103.15	I18	1.21317e+08	6.47959e+06	4.1111e+07	4.12011e+07		10.1139	0.753723	1.36328	0	0	13.5942
108.9	I19	1.22149e+08	4.55797e+06	4.17411e+07	4.15609e+07		10.1989	0.526581	1.36581	0	0	13.4571
114.617	I20	1.20945e+08	5.7888e+06	4.24349e+07	4.10525e+07		10.4717	0.675441	1.36254	0	0	13.8723
120.35	I21	1.20407e+08	4.7514e+06	4.21685e+07	4.07402e+07		10.4525	0.556874	1.35822	0	0	13.7258		when phosphorus source is RhHCOPPh33
126.067	I22	1.20003e+08	6.9442e+06	4.29615e+07	4.05247e+07		10.6849	0.816612	1.35558	0	0	14.2126
131.8	I23	1.19182e+08	5.63779e+06	4.31845e+07	39561232		10.8143	0.66755	1.33247	0	0	14.1468		Rh concentration
137.533	I24	1.20591e+08	5110218	4.09736e+07	3.9944e+07		10.1408	0.598012	1.32964	0	0	13.398		actual weight (g)	0.0131
143.283	I25	1.21707e+08	6.5904e+06	4.21903e+07	4.02559e+07		10.3462	0.764157	1.32774	0	0	13.7658		MW RhHCO(PPh3)3 (g/mol)	918.78
149	I26	1.22905e+08	6.14017e+06	4.26443e+07	3.97769e+07		10.3556	0.705014	1.29916	0	0	13.6589		MW Rh(acac)(CO)2 (g/mol)	258.03
154.717	I27	1.21777e+08	6.4143e+06	4.09127e+07	3.88012e+07		10.027	0.743307	1.27902	0	0	13.3284		Number of mol (n)	5.07693e-05
160.467	I28	1.21684e+08	6.27221e+06	4.3028e+07	3.84645e+07		10.5535	0.727397	1.26889	0	0	13.8187		actual volume of reaction (L)	0.0211
166.217	I29	1.21425e+08	7.24184e+06	4.27996e+07	3.93284e+07		10.5199	0.841637	1.30015	0	0	13.9618		[Rh] (M)	0.00240613
171.983	I30	1.22599e+08	6.27661e+06	4.33192e+07	3.91355e+07		10.5457	0.722477	1.2814	0	0	13.831		[Rh] (mM)	2.40613		[PPh3]	7.21838
177.733	I31	1.21686e+08	5.47237e+06	4.16408e+07	3.78732e+07		10.2132	0.63463	1.24937	0	0	13.3465
183.433	I32	1.22204e+08	6.32381e+06	4.18175e+07	3.91373e+07		10.213	0.730262	1.28559	0	0	13.5144
189.183	I33	1.20686e+08	6.39545e+06	4.34055e+07	3.76546e+07		10.7342	0.747823	1.25244	0	0	13.9869
194.917	I34	1.20641e+08	6.867e+06	4.08605e+07	3.81527e+07		10.1086	0.803265	1.26949	0	0	13.4508
200.633	I35	1.22251e+08	6.90834e+06	4.151e+07	3.7555e+07		10.134	0.797455	1.23314	0	0	13.3977
206.35	I36	1.20641e+08	7.24572e+06	4.22691e+07	3.73947e+07		10.4571	0.847565	1.24427	0	0	13.7932
212.1	I37	1.21026e+08	6.98482e+06	4.14588e+07	3.69096e+07		10.224	0.814445	1.22422	0	0	13.4868
217.833	I38	121304286	6.53833e+06	4.20506e+07	3.70761e+07		10.3461	0.760635	1.22692	0	0	13.5606
223.567	I39	1.2208e+08	7.11249e+06	4.23917e+07	3.72509e+07		10.3638	0.822171	1.22487	0	0	13.6357
229.317	I40	1.20813e+08	6.05292e+06	4.37634e+07	3.67749e+07		10.8113	0.707026	1.22189	0	0	13.9621
235.033	I41	1.21364e+08	6.42933e+06	4.36603e+07	3.6305e+07		10.7369	0.747585	1.20081	0	0	13.8861
240.75	I42	1.21237e+08	6.6567e+06	4.17379e+07	3.62448e+07		10.2748	0.774833	1.20007	0	0	13.4498
246.5	I43	1.22517e+08	7.7584e+06	4.22043e+07	3.60375e+07		10.2811	0.893635	1.18074	0	0	13.5363
252.233	I44	1.21191e+08	7.51119e+06	4.47121e+07	3.54005e+07		11.0112	0.874629	1.17257	0	0	14.231
257.95	I45	1.21777e+08	7.81523e+06	4.15088e+07	3.52888e+07		10.1732	0.905656	1.16325	0	0	13.4053
263.65	I46	1.22002e+08	6.8032e+06	4.29773e+07	3.4129e+07		10.5137	0.786923	1.12294	0	0	13.5465
269.383	I47	1.22185e+08	7.50957e+06	4.40361e+07	3.49538e+07		10.7565	0.867327	1.14835	0	0	13.9205
275.083	I48	1.21041e+08	8.23849e+06	4.42031e+07	3.43659e+07		10.8994	0.960506	1.13971	0	0	14.1393
280.8	I49	1.21445e+08	7.04877e+06	4.20466e+07	3.53227e+07		10.3331	0.819066	1.16754	0	0	13.4873
286.533	I50	1.21809e+08	7.08131e+06	4.30462e+07	3.50223e+07		10.5472	0.820387	1.15415	0	0	13.6758											6.51792
292.25	I51	1.22334e+08	7.00722e+06	4.26977e+07	3.34412e+07		10.4169	0.808318	1.09732	0	0	13.4198											7.45221
297.967	I52	1.21599e+08	7.1473e+06	4.20333e+07	3.36474e+07		10.3168	0.829465	1.11076	0	0	13.3678											6.90797
303.683	I53	1.21682e+08	7.22592e+06	4.26727e+07	3.40897e+07		10.4666	0.838017	1.12459	0	0	13.5538
309.417	I54	1.22371e+08	6.17098e+06	4.52742e+07	3.39721e+07		11.0422	0.711643	1.1144	0	0	13.9826
315.15	I55	1.21771e+08	7.37441e+06	4.46375e+07	3.29405e+07		10.9405	0.854612	1.08589	0	0	13.9669
320.867	I56	1.21412e+08	7.09052e+06	4.38521e+07	3.24603e+07		10.7798	0.824143	1.07322	0	0	13.7504
326.6	I57	1.22855e+08	8.16521e+06	4.41994e+07	3.17387e+07		10.7375	0.937904	1.03703	0	0	13.7495
332.333	I58	1.21373e+08	7.85865e+06	4.29755e+07	3.21307e+07		10.5677	0.91372	1.06267	0	0	13.6068										Object	Integral [abs]	Integral [rel]
338.067	I59	1.21644e+08	7.35393e+06	4.27964e+07	3.13039e+07		10.5002	0.853127	1.03301	0	0	13.4193										Integral 1	1.6066e+06	0.7651
343.783	I60	1.2152e+08	8056727	4.23114e+07	3.11734e+07		10.3918	0.935615	1.02976	0	0	13.387										Integral 2	1.63721e+06	0.7797
349.517	I61	1.22415e+08	6.94272e+06	4.37405e+07	3.17909e+07		10.6642	0.80035	1.04248	0	0	13.5495										Integral 3	2.44396e+07	11.6394
355.233	I62	1.22113e+08	7.53201e+06	4.39574e+07	3.1388e+07		10.7437	0.870434	1.03181	0	0	13.6777
360.933	I63	1.22005e+08	7.73227e+06	4.44071e+07	3.10575e+07		10.8632	0.894367	1.02185	0	0	13.8012
366.667	I64	1.23281e+08	6.9869e+06	4.42024e+07	3.00169e+07		10.7011	0.799785	0.977387	0	0	13.4557										Object	Integral [abs]	Integral [rel]
372.383	I65	1.22299e+08	7.26877e+06	4.38309e+07	3.00879e+07		10.6964	0.838734	0.987568	0	0	13.5103										Integral 1	1.04717e+07	0.8794
378.083	I66	1.21911e+08	8.33172e+06	4.54156e+07	3.0245e+07		11.1184	0.964446	0.995885	0	0	14.0747										Integral 2	1.22008e+07	1.0247
383.817	I67	1.21827e+08	7.90167e+06	4.41779e+07	3.07988e+07		10.8229	0.915294	1.01482	0	0	13.7678										Integral 3	1.68828e+08	14.1785
389.533	I68	1.22565e+08	7.28848e+06	4.44983e+07	2.93837e+07		10.8358	0.839185	0.962365	0	0	13.5997
395.25	I69	1.21978e+08	8.0514e+06	4.35108e+07	3.04627e+07		10.6462	0.931483	1.0025	0	0	13.5827
400.95	I70	1.22148e+08	8.30618e+06	4.57116e+07	2.98703e+07		11.1692	0.959621	0.981636	0	0	14.092
406.667	I71	1.21838e+08	8.18014e+06	4.6051e+07	2.96226e+07		11.2808	0.947468	0.975975	0	0	14.1802
412.367	I72	1.2147e+08	7.93242e+06	4.68002e+07	2.90431e+07		11.499	0.921559	0.959783	0	0	14.3402
418.117	I73	1.22751e+08	7.70449e+06	4.3826e+07	2.81742e+07		10.6559	0.885736	0.92135	0	0	13.3843
423.867	I74	1.20474e+08	8.25772e+06	4.55457e+07	2.86552e+07		11.2833	0.967283	0.954793	0	0	14.1602
429.583	I75	1.21375e+08	8.57229e+06	46367742	2.79938e+07		11.4016	0.996672	0.925825	0	0	14.2499
435.317	I76	1.20783e+08	7.49137e+06	4.50686e+07	2.79141e+07		11.1365	0.875264	0.927715	0	0	13.8672
441.033	I77	1.21291e+08	7.60807e+06	4.36309e+07	2.85765e+07		10.7361	0.885179	0.945754	0	0	13.5128
446.767	I78	121696870	8.02049e+06	4.40563e+07	2.81115e+07		10.8046	0.930051	0.927263	0	0	13.5892
452.5	I79	1.21472e+08	8.54906e+06	4.41102e+07	2.82326e+07		10.8379	0.993179	0.93298	0	0	13.697
458.217	I80	1.21386e+08	7.91473e+06	4.52587e+07	2.88072e+07		11.1279	0.920138	0.952643	0	0	13.9534
463.983	I81	1.22321e+08	7.93716e+06	4.3738e+07	2.73693e+07		10.6718	0.915692	0.898175	0	0	13.3839
469.733	I82	1.21253e+08	8.3329e+06	4.44174e+07	2.7066e+07		10.9331	0.969815	0.896043	0	0	13.695
475.45	I83	1.21902e+08	7.73812e+06	4.46177e+07	2.71028e+07		10.9239	0.895801	0.892489	0	0	13.6047
481.233	I84	1.21166e+08	7.78162e+06	4.37513e+07	2.68544e+07		10.7768	0.906307	0.889679	0	0	13.4625
486.967	I85	1.20807e+08	8.03377e+06	4.48238e+07	2.76623e+07		11.0738	0.938452	0.919166	0	0	13.8506
492.683	I86	1.21128e+08	7.72757e+06	4.37941e+07	2.61614e+07		10.7908	0.900294	0.866993	0	0	13.4251
498.433	I87	1.22627e+08	9.2934e+06	4.49703e+07	2.62116e+07		10.9451	1.06948	0.858035	0	0	13.7306
504.167	I88	1.21402e+08	8.23028e+06	4.47444e+07	2.56296e+07		11	0.956696	0.847448	0	0	13.6516
509.917	I89	1.21438e+08	7.57584e+06	4.5224e+07	2.5978e+07		11.1146	0.880362	0.858715	0	0	13.7124
515.667	I90	1.2126e+08	7.65101e+06	4.31959e+07	2.58763e+07		10.6318	0.890402	0.856609	0	0	13.2354
521.367	I91	1.21372e+08	7.88498e+06	4.40625e+07	2.48322e+07		10.8351	0.916788	0.821288	0	0	13.3945
527.117	I92	1.21582e+08	7.78074e+06	4.35561e+07	2.54515e+07		10.6921	0.903105	0.840315	0	0	13.2758
532.867	I93	1.20665e+08	8.62204e+06	4.46993e+07	2.58909e+07		11.0561	1.00836	0.861321	0	0	13.7871
538.6	I94	1.21666e+08	8.16544e+06	4.35382e+07	2.46785e+07		10.6803	0.9471	0.814231	0	0	13.2558
544.333	I95	1.20754e+08	9.09676e+06	4.54135e+07	2.44843e+07		11.2244	1.06309	0.813924	0	0	13.9153
550.067	I96	1.2124e+08	8.46574e+06	4.46728e+07	2.57098e+07		10.9971	0.985378	0.851234	0	0	13.6849
555.817	I97	1.21302e+08	7.88514e+06	4.48553e+07	2.48095e+07		11.0363	0.917329	0.821005	0	0	13.5957
561.55	I98	1.21074e+08	8.4893e+06	4.40014e+07	2.51613e+07		10.8467	0.989482	0.834223	0	0	13.5046
567.3	I99	1.20778e+08	8.04674e+06	4.38035e+07	2.37226e+07		10.8243	0.940195	0.788445	0	0	13.3414
573.017	I100	1.21834e+08	9.25521e+06	4.51858e+07	2.45779e+07		11.0692	1.07202	0.809793	0	0	13.7608
578.75	I101	1.21911e+08	8.8162e+06	4.62586e+07	23949247		11.3249	1.02053	0.788585	0	0	13.9225
584.467	I102	1.21498e+08	9.78123e+06	4.50842e+07	2.37161e+07		11.0748	1.13608	0.783561	0	0	13.778
590.183	I103	1.21153e+08	8.95508e+06	4.3246e+07	2.37493e+07		10.6535	1.04309	0.786888	0	0	13.2704
595.883	I104	1.21355e+08	9.00432e+06	4.43912e+07	2.44755e+07		10.9175	1.04708	0.809604	0	0	13.5838
601.633	I105	1.22285e+08	8.99823e+06	4.41165e+07	2.4463e+07		10.7673	1.03841	0.803033	0	0	13.4118
607.35	I106	1.21743e+08	9.52613e+06	4.38493e+07	2.38924e+07		10.7498	1.10423	0.787796	0	0	13.4296
613.1	I107	1.22434e+08	8.46996e+06	4.48798e+07	2.24358e+07		10.9403	0.97626	0.735594	0	0	13.3878
618.833	I108	1.2092e+08	9.35454e+06	4.46001e+07	2.37708e+07		11.0082	1.09171	0.789117	0	0	13.6782
624.567	I109	1.21442e+08	9.33087e+06	4.32086e+07	2.45437e+07		10.6189	1.08427	0.811273	0	0	13.3258
630.3	I110	1.21285e+08	8.95431e+06	4.45061e+07	2.35629e+07		10.9521	1.04187	0.779869	0	0	13.5537
636.033	I111	1.21062e+08	9.36663e+06	4.55477e+07	2.32e+07		11.229	1.09184	0.769269	0	0	13.8593
641.783	I112	1.21592e+08	9.33132e+06	4.49599e+07	2.26888e+07		11.0357	1.08298	0.749035	0	0	13.6167
647.533	I113	1.21705e+08	8.92228e+06	4.56874e+07	2.3773e+07		11.2039	1.03455	0.784102	0	0	13.8067
653.267	I114	1.21498e+08	8.9127e+06	4.35393e+07	2.32364e+07		10.6953	1.0352	0.767711	0	0	13.2659
659.017	I115	1.221e+08	9.38982e+06	4.44312e+07	2.22308e+07		10.8606	1.08524	0.730865	0	0	13.4075
664.733	I116	1.22211e+08	8.92265e+06	4.28063e+07	2.22951e+07		10.4539	1.03031	0.732313	0	0	12.9488
670.467	I117	1.22305e+08	9.35727e+06	4.43494e+07	2.30012e+07		10.8224	1.07967	0.754924	0	0	13.4119
676.217	I118	1.22286e+08	9.88431e+06	4.52278e+07	2.13095e+07		11.0385	1.14066	0.699513	0	0	13.5782
681.95	I119	1.20974e+08	9.30022e+06	4.38729e+07	2.27411e+07		10.8239	1.08489	0.7546	0	0	13.418
687.65	I120	1.21946e+08	1.02748e+07	4.48785e+07	2.2308e+07		10.9838	1.18902	0.734331	0	0	13.6415
693.367	I121	1.21219e+08	1.04547e+07	42538870	2.21518e+07		10.4737	1.2171	0.733565	0	0	13.1579
699.083	I122	1.20423e+08	9.3929e+06	4.41456e+07	2.26146e+07		10.9411	1.10072	0.753837	0	0	13.5495
704.833	I123	1.2139e+08	9.69751e+06	4.51317e+07	2.15525e+07		11.0963	1.12736	0.712708	0	0	13.6491
710.6	I124	1.21875e+08	9.11592e+06	4.47402e+07	2.19082e+07		10.9563	1.05553	0.72159	0	0	13.455
716.3	I125	1.22201e+08	1.06381e+07	4.38333e+07	2.25852e+07		10.7056	1.22849	0.741904	0	0	13.4179
722.033	I126	1.22234e+08	9.18699e+06	4.60789e+07	2.18722e+07		11.251	1.06064	0.718289	0	0	13.7482
727.767	I127	1.22214e+08	1.01928e+07	4.39977e+07	2.29616e+07		10.7446	1.17695	0.754186	0	0	13.4299
733.5	I128	1.22488e+08	9.35718e+06	4.62743e+07	2.2725e+07		11.2753	1.07805	0.744748	0	0	13.8429
739.217	I129	1.22403e+08	1.01935e+07	4.50275e+07	2.18018e+07		10.9791	1.17521	0.714985	0	0	13.5843
744.95	I130	1.21459e+08	1.04162e+07	4.20787e+07	2.14607e+07		10.3398	1.21022	0.709268	0	0	12.9686
750.7	I131	1.2097e+08	9.00723e+06	4.32067e+07	2.09808e+07		10.6599	1.05075	0.696212	0	0	13.1031
756.4	I132	1.20896e+08	9.8774e+06	4.69427e+07	2.15658e+07		11.5888	1.15297	0.716063	0	0	14.1739
762.133	I133	1.22003e+08	1.00281e+07	4.2384e+07	2.162e+07		10.3684	1.15993	0.711346	0	0	12.951
767.85	I134	1.21547e+08	1.01159e+07	4.66912e+07	2.08513e+07		11.465	1.17449	0.688633	0	0	14.0167
