# Supplementary material for: Mapping catalyst activation, turnover speciation and deactivation in Rh/PPh3-catalysed olefin hydroformylation
Source: Royal Society of Chemistry journal article supplement (doi:10.1039/d2cy00312k), 2022-01-01
Supplement: d2cy00312k2.xlsx [file d2cy00312k2.xlsx]

## Sheet: Proton
time [min]:	Peak name	hydrogen bond #1	acac coordinated #1	acac decoordinatedl #1	Hydrogen #2	TMB aromatic #3	TMB methyl #9	1-hexene (other H double bond)	[1-hexene]	[1-heptanal]	[2-methylhexanal]	[Hydrogen]	[TMB aromatic]	[TMB methyl]	[1-hexene (other H double bond)]		total																					time [min]:	Peak name	1	2	3	4	5
0.0166667	I0	48947.5	214502	-12847.1	57177.8		9.43656e+07		1.01376	5.27543	-0.291551	0.124589	0	85.3808	0		5.27543	INTERNAL REFERENCE			FLOW CALIBRATION																	0.0166667	I0	48947.5	214502	-12847.1	57177.8	9.43656e+07
5.83333	I1	57809	219107	10658.6	45987.1		9.39861e+07		1.20212	5.41044	0.242862	0.100609	0	85.3808	0			1-hexene Volume (mL)	1.3			1-hexene (initial)	1-hexene (end)	1-heptanal (end)	2-methylhexanal (end)	Hydrogen (end)	TMB aromatic (initial)	TMB methyl (initial)	TMB aromatic (end)	TMB methyl (end)	1-hexene (other H double bond)							5.83333	I1	57809	219107	10658.6	45987.1	9.39861e+07
11.55	I2	23747.8	193992	855.875	4.0902e+06		9.41595e+07		0.492918	4.78145	0.0194656	8.93196	0	85.3808	0			1-hexene n (moles)	0.0104729		0 mL/min	29142933	4176547	20157390	6.62235e+06	1074285	2.00388e+07	62136918	20500117	6.30756e+07	6.17893e+06							11.55	I2	23747.8	193992	855.875	4.0902e+06	9.41595e+07
17.2833	I3	85495.9	159468	39576.4	4.74523e+06		9.39652e+07		1.77826	3.93864	0.901969	10.3838	0	85.3808	0			Reaction Volume (L)	0.0224		4 mL/min	6.75363e+06	987741	4.8867e+06	1.7202e+06	1.58738e+06	7.57361e+06	3.6012e+07	8.49335e+06	3.78577e+07	1.62179e+06							17.2833	I3	85495.9	159468	39576.4	4.74523e+06	9.39652e+07
23.0167	I4	58335.6	133050	52679.8	4.7907e+06		9.44468e+07		1.20716	3.26939	1.19448	10.4298	0	85.3808	0			1-hexene (M)	0.467541		CF	4.31515	4.22838	4.12495	3.84975	0.676765	2.64587	1.72545	2.41367	1.66612	3.80995							23.0167	I4	58335.6	133050	52679.8	4.7907e+06	9.44468e+07
28.7333	I5	148980	116321	54970	4.75743e+06		9.43258e+07		3.08685	2.86198	1.24801	10.3707	0	85.3808	0			1-hexene(mM)	467.541																			28.7333	I5	148980	116321	54970	4.75743e+06	9.43258e+07
34.4333	I6	115516	93677.9	63785.5	4.75795e+06		9.42895e+07		2.3944	2.30576	1.44871	10.3758	0	85.3808	0																							34.4333	I6	115516	93677.9	63785.5	4.75795e+06	9.42895e+07
40.1833	I7	122450	82531.4	74970.5	4.75842e+06		9.51062e+07		2.51632	2.01396	1.68812	10.2878	0	85.3808	0			# is the number of protons of the peak taken for integration			0 mL	static with long delay (flow+ full relaxtion effects)	2.98873e+06	2.21134e+07	7.21829e+06	1.81406e+06			2.06713e+07	6.2014e+07	6.23515e+06							40.1833	I7	122450	82531.4	74970.5	4.75842e+06	9.51062e+07
45.9	I8	133608	60387.6	85292.6	4.72965e+06		9.4252e+07		2.7705	1.48695	1.93795	10.3182	0	85.3808	0			If #>1 the integration will be divided by the number of protons			4 mL	flow with shot delay (flow + poor relaxiation)	1.71889e+06	1.31871e+07	4.54702e+06	2.39944e+06			1.82401e+07	7.37824e+07	3.96139e+06							45.9	I8	133608	60387.6	85292.6	4.72965e+06	9.4252e+07
51.6167	I9	158164	54324.4	90155.5	4.74215e+06		9.48014e+07		3.26068	1.3299	2.03657	10.2855	0	85.3808	0								1.73875	1.6769	1.58748	0.756035	#DIV/0!	#DIV/0!	1.13328	0.840499	1.57398		no corrections factors for this reaction. 09-11-202					51.6167	I9	158164	54324.4	90155.5	4.74215e+06	9.48014e+07
57.3333	I10	179568	46543.9	107551	4.76693e+06		95509507		3.67451	1.13098	2.41152	10.2626	0	85.3808	0							initial CF were calculated under Argon ( the reactor was still no pressurized)																57.3333	I10	179568	46543.9	107551	4.76693e+06	95509507
63.0667	I11	160506	37342	99579.5	4.72798e+06		9.57956e+07		3.27464	0.904674	2.22611	10.1484	0	85.3808	0			INTERNAL REFERENCE STANDARD				final CF were calculated under 10 bar H2/CO ( reactor pressurized)																63.0667	I11	160506	37342	99579.5	4.72798e+06	9.57956e+07
68.7667	I12	159349	36954.9	120295	4.78018e+06		9.579e+07		3.25122	0.895347	2.68937	10.261	0	85.3808	0			Mass of TMB (g)	0.303																			68.7667	I12	159349	36954.9	120295	4.78018e+06	9.579e+07
74.4833	I13	175662	11570.8	123452	4.7919e+06		9.61668e+07		3.57001	0.279239	2.74913	10.2459	0	85.3808	0			Molecular weight of TMB (g/mol)	168.19																			74.4833	I13	175662	11570.8	123452	4.7919e+06	9.61668e+07
80.2167	I14	180702	1649.75	115927	4.81231e+06		9.61906e+07		3.67152	0.0398039	2.58093	10.287	0	85.3808	0			Moles of TMB (n)	0.00180153			CF calculated in ABE-012-01 using D1=60																80.2167	I14	180702	1649.75	115927	4.81231e+06	9.61906e+07
85.9333	I15	209327	4555.62	126126	4806473		9.65937e+07		4.23538	0.109456	2.79626	10.2316	0	85.3808	0			Reaction Volume (L)	0.0211																			85.9333	I15	209327	4555.62	126126	4806473	9.65937e+07
91.7	I16	201060	-7682.12	129204	4.82009e+06		97046287		4.04915	-0.183714	2.85114	10.2127	0	85.3808	0			TMB (M)	0.0853808																			91.7	I16	201060	-7682.12	129204	4.82009e+06	97046287
97.4167	I17	193523	7399.75	139400	4.79353e+06		9.64817e+07		3.92017	0.177997	3.09414	10.2159	0	85.3808	0			TMB (mM)	85.3808		FLOW CALIBRATION																	97.4167	I17	193523	7399.75	139400	4.79353e+06	9.64817e+07
103.15	I18	199250	-10149.9	144728	4756552		9.60807e+07		4.05303	-0.245169	3.22582	10.1794	0	85.3808	0							1-hexene (initial)	1-hexene (end)	1-heptanal (end)	2-methylhexanal (end)	Hydrogen (end)	TMB aromatic (initial)	TMB methyl (initial)	TMB aromatic (end)	TMB methyl (end)	1-hexene (other H double bond)							103.15	I18	199250	-10149.9	144728	4756552	9.60807e+07
108.9	I19	191715	-19574.9	139365	4.75021e+06		9.57991e+07		3.91121	-0.474218	3.1154	10.1957	0	85.3808	0						0 mL/min	2.78016e+07	7.53593e+06	1.87317e+07	5722346	4.41821e+06	2.16925e+07	6.43757e+07	2.16584e+07	6.12478e+07	1.44223e+07							108.9	I19	191715	-19574.9	139365	4.75021e+06	9.57991e+07
114.617	I20	204656	-26132	153236	4.76214e+06		9.6272e+07		4.15471	-0.62996	3.40866	10.1711	0	85.3808	0						4 mL/min	6.11977e+06	1757276	3.67838e+06	1.21779e+06	3.89945e+06	7.34342e+06	3.6664e+07	7.98182e+06	3.63252e+07	3.68713e+06							114.617	I20	204656	-26132	153236	4.76214e+06	9.6272e+07
120.35	I21	214400	-34243.9	140377	4.75947e+06		9.66874e+07		4.33383	-0.821964	3.1092	10.1217	0	85.3808	0						CF	4.54292	4.28842	5.09238	4.69897	1.13304	2.954	1.75583	2.71347	1.6861	3.91153							120.35	I21	214400	-34243.9	140377	4.75947e+06	9.66874e+07
126.1	I22	202216	-23642.8	140766	4.73967e+06		9.63108e+07		4.10354	-0.569722	3.13002	10.119	0	85.3808	0																							126.1	I22	202216	-23642.8	140766	4.73967e+06	9.63108e+07
131.833	I23	208327	-16934.6	131935	4.73484e+06		96177771		4.23338	-0.40864	2.93769	10.1227	0	85.3808	0																							131.833	I23	208327	-16934.6	131935	4.73484e+06	96177771
137.583	I24	194735	-32053.9	135472	4.74924e+06		9.5878e+07		3.96955	-0.775893	3.02588	10.1852	0	85.3808	0											Value taken from ABE-013-01												137.583	I24	194735	-32053.9	135472	4.74924e+06	9.5878e+07
143.3	I25	217954	-35122.9	139198	4.74408e+06		9.63359e+07		4.42173	-0.84614	3.09434	10.1258	0	85.3808	0																							143.3	I25	217954	-35122.9	139198	4.74408e+06	9.63359e+07
149.067	I26	209038	-29471.5	136692	4.72204e+06		9.62712e+07		4.2437	-0.71047	3.04067	10.0855	0	85.3808	0																							149.067	I26	209038	-29471.5	136692	4.72204e+06	9.62712e+07
154.8	I27	196682	-23498.2	147173	4.85116e+06		9.67355e+07		3.9737	-0.563754	3.25809	10.3116	0	85.3808	0																							154.8	I27	196682	-23498.2	147173	4.85116e+06	9.67355e+07
160.533	I28	253059	-40365.1	130585	4.79051e+06		96390150		5.13105	-0.971883	2.90123	10.2192	0	85.3808	0																							160.533	I28	253059	-40365.1	130585	4.79051e+06	96390150
166.267	I29	177720	-489.125	147102	4.71868e+06		9.58567e+07		3.62352	-0.0118423	3.28639	10.122	0	85.3808	0																							166.267	I29	177720	-489.125	147102	4.71868e+06	9.58567e+07
172.017	I30	187219	-7946.75	142362	4690508		9.54475e+07		3.83356	-0.193226	3.19413	10.1047	0	85.3808	0																							172.017	I30	187219	-7946.75	142362	4690508	9.54475e+07
177.783	I31	177556	9773.25	151253	4.67467e+06		9.59318e+07		3.61733	0.236438	3.37648	10.0197	0	85.3808	0																							177.783	I31	177556	9773.25	151253	4.67467e+06	9.59318e+07
183.533	I32	220723	-32610.4	129012	4.68137e+06		9.59335e+07		4.4967	-0.788907	2.87994	10.0339	0	85.3808	0																							183.533	I32	220723	-32610.4	129012	4.68137e+06	9.59335e+07
189.283	I33	170388	-7235.5	152410	4713600		9.59313e+07		3.47133	-0.175044	3.40231	10.1032	0	85.3808	0																							189.283	I33	170388	-7235.5	152410	4713600	9.59313e+07
195.067	I34	158504	-23649	129269	4.68685e+06		9.57778e+07		3.23438	-0.573044	2.89037	10.062	0	85.3808	0																							195.067	I34	158504	-23649	129269	4.68685e+06	9.57778e+07
200.8	I35	214194	-28652	130432	4.6696e+06		96070569		4.35746	-0.692157	2.90747	9.99438	0	85.3808	0																							200.8	I35	214194	-28652	130432	4.6696e+06	96070569
206.55	I36	210188	-31906.1	135797	4.66458e+06		9.57665e+07		4.28955	-0.773216	3.03668	10.0153	0	85.3808	0																							206.55	I36	210188	-31906.1	135797	4.66458e+06	9.57665e+07
212.283	I37	209883	-25428.6	140955	4.69385e+06		9.56403e+07		4.28897	-0.617053	3.15619	10.0915	0	85.3808	0																							212.283	I37	209883	-25428.6	140955	4.69385e+06	9.56403e+07
218.05	I38	180746	-20273	144819	4.6793e+06		9.77647e+07		3.6133	-0.481256	3.17224	9.84159	0	85.3808	0																							218.05	I38	180746	-20273	144819	4.6793e+06	9.77647e+07
223.8	I39	182500	-31581.6	123912	4.73044e+06		96478593		3.69698	-0.759703	2.75047	10.0818	0	85.3808	0																							223.8	I39	182500	-31581.6	123912	4.73044e+06	96478593
229.55	I40	256353	-25141	136444	4.71041e+06		97980715		5.11345	-0.5955	2.9822	9.88517	0	85.3808	0																							229.55	I40	256353	-25141	136444	4.71041e+06	97980715
235.267	I41	218215	-37276.8	128220	4.77004e+06		9.73731e+07		4.37987	-0.888463	2.81993	10.0728	0	85.3808	0																							235.267	I41	218215	-37276.8	128220	4.77004e+06	9.73731e+07
241.017	I42	272332	-34268.4	133119	4.71427e+06		9.73601e+07		5.46681	-0.81687	2.92808	9.95635	0	85.3808	0																							241.017	I42	272332	-34268.4	133119	4.71427e+06	9.73601e+07
246.767	I43	182743	-17317	143711	4750889		9.76818e+07		3.65631	-0.411433	3.15063	10.0006	0	85.3808	0																							246.767	I43	182743	-17317	143711	4750889	9.76818e+07
252.5	I44	261798	-38398	130720	4.69686e+06		9.73616e+07		5.25527	-0.915294	2.87526	9.91942	0	85.3808	0																							252.5	I44	261798	-38398	130720	4.69686e+06	9.73616e+07
258.217	I45	195962	-7710.88	156816	4764264		9.78413e+07		3.91441	-0.182903	3.43233	10.0124	0	85.3808	0																							258.217	I45	195962	-7710.88	156816	4764264	9.78413e+07
263.933	I46	179114	-25161.4	139662	4.69878e+06		9.71248e+07		3.60425	-0.601235	3.07943	9.94766	0	85.3808	0																							263.933	I46	179114	-25161.4	139662	4.69878e+06	9.71248e+07
269.667	I47	174379	-7567.75	151087	4.73503e+06		9.76049e+07		3.49172	-0.179943	3.31496	9.97511	0	85.3808	0																							269.667	I47	174379	-7567.75	151087	4.73503e+06	9.76049e+07
275.367	I48	262114	-29013.5	127566	4.66937e+06		9.68048e+07		5.29188	-0.695574	2.82203	9.91809	0	85.3808	0																							275.367	I48	262114	-29013.5	127566	4.66937e+06	9.68048e+07
281.083	I49	245834	-24974.4	145899	4.75541e+06		9.75659e+07		4.92448	-0.594069	3.20242	10.022	0	85.3808	0																							281.083	I49	245834	-24974.4	145899	4.75541e+06	9.75659e+07
286.817	I50	244396	-21871.5	133353	4.69484e+06		9.72207e+07		4.91307	-0.522108	2.93742	9.92952	0	85.3808	0																							286.817	I50	244396	-21871.5	133353	4.69484e+06	9.72207e+07
292.517	I51	187626	3064.62	148978	4.71847e+06		9.74961e+07		3.76117	0.0729508	3.27232	9.95131	0	85.3808	0																							292.517	I51	187626	3064.62	148978	4.71847e+06	9.74961e+07
298.25	I52	175333	-23917.8	142766	4.67992e+06		9.77586e+07		3.5053	-0.567813	3.12746	9.8435	0	85.3808	0																							298.25	I52	175333	-23917.8	142766	4.67992e+06	9.77586e+07
303.967	I53	198192	-32968.8	142238	4.75121e+06		9.8006e+07		3.95231	-0.78071	3.10802	9.96822	0	85.3808	0																							303.967	I53	198192	-32968.8	142238	4.75121e+06	9.8006e+07
309.7	I54	178157	2474.38	139250	4.65091e+06		9.76119e+07		3.56712	0.0588305	3.05502	9.79718	0	85.3808	0																							309.7	I54	178157	2474.38	139250	4.65091e+06	9.76119e+07
315.45	I55	191811	-7208	156310	4.73022e+06		97504573		3.84473	-0.171565	3.43308	9.97521	0	85.3808	0																							315.45	I55	191811	-7208	156310	4.73022e+06	97504573
321.167	I56	179405	7563.12	155184	4.63805e+06		9.78695e+07		3.58264	0.179347	3.39565	9.74438	0	85.3808	0																							321.167	I56	179405	7563.12	155184	4.63805e+06	9.78695e+07
326.9	I57	185999	-10700.8	157980	4.70263e+06		9.75808e+07		3.72532	-0.254501	3.46706	9.90929	0	85.3808	0																							326.9	I57	185999	-10700.8	157980	4.70263e+06	9.75808e+07
332.617	I58	169617	3034.62	150334	4.61421e+06		9.80229e+07		3.38188	0.0718485	3.28438	9.67914	0	85.3808	0																							332.617	I58	169617	3034.62	150334	4.61421e+06	9.80229e+07
338.367	I59	181942	-16525.1	159135	4.65708e+06		9.76372e+07		3.64195	-0.392798	3.49039	9.80764	0	85.3808	0																							338.367	I59	181942	-16525.1	159135	4.65708e+06	9.76372e+07
344.117	I60	210182	-25406.4	137288	4.62934e+06		9.75061e+07		4.21289	-0.604716	3.01526	9.76233	0	85.3808	0																							344.117	I60	210182	-25406.4	137288	4.62934e+06	9.75061e+07
349.833	I61	184722	-7043.62	147109	4.65189e+06		9.74942e+07		3.70303	-0.167671	3.23134	9.81108	0	85.3808	0																							349.833	I61	184722	-7043.62	147109	4.65189e+06	9.74942e+07
355.533	I62	171579	-4010.75	146082	4608608		98123270		3.4175	-0.0948623	3.1882	9.65749	0	85.3808	0																							355.533	I62	171579	-4010.75	146082	4608608	98123270
361.267	I63	183108	-5913.88	157760	4.65568e+06		9.765e+07		3.6648	-0.140553	3.45977	9.80342	0	85.3808	0																							361.267	I63	183108	-5913.88	157760	4.65568e+06	9.765e+07
367	I64	182942	-3131.62	156036	4.60123e+06		9.80675e+07		3.64591	-0.0741114	3.40739	9.64751	0	85.3808	0																							367	I64	182942	-3131.62	156036	4.60123e+06	9.80675e+07
372.75	I65	204950	-23932.2	139084	4.67978e+06		97615520		4.10343	-0.56899	3.05128	9.85764	0	85.3808	0																							372.75	I65	204950	-23932.2	139084	4.67978e+06	97615520
378.467	I66	199678	1131.5	154694	4.60665e+06		9.82531e+07		3.97192	0.0267269	3.37171	9.64061	0	85.3808	0																							378.467	I66	199678	1131.5	154694	4.60665e+06	9.82531e+07
384.217	I67	186792	-14615.4	150128	4.65685e+06		97763412		3.73421	-0.346955	3.28858	9.7945	0	85.3808	0																							384.217	I67	186792	-14615.4	150128	4.65685e+06	97763412
389.917	I68	167376	1080	147274	4.62246e+06		9.85119e+07		3.32063	0.0254434	3.20155	9.6483	0	85.3808	0																							389.917	I68	167376	1080	147274	4.62246e+06	9.85119e+07
395.633	I69	250695	-28578.8	133005	4.66297e+06		9.82338e+07		4.98771	-0.675184	2.89954	9.76041	0	85.3808	0																							395.633	I69	250695	-28578.8	133005	4.66297e+06	9.82338e+07
401.333	I70	187758	-4831.38	152801	4.5986e+06		9.86346e+07		3.72037	-0.113679	3.31757	9.58657	0	85.3808	0																							401.333	I70	187758	-4831.38	152801	4.5986e+06	9.86346e+07
407.067	I71	246634	-40154.8	130591	4.67237e+06		97876346		4.92483	-0.952137	2.85731	9.8158	0	85.3808	0																							407.067	I71	246634	-40154.8	130591	4.67237e+06	97876346
412.783	I72	242128	-31781.8	136159	4.64034e+06		9.89459e+07		4.78259	-0.745453	2.94694	9.64314	0	85.3808	0																							412.783	I72	242128	-31781.8	136159	4.64034e+06	9.89459e+07
418.517	I73	266602	-29027	137971	4670111		9.82939e+07		5.30096	-0.685355	3.00596	9.76938	0	85.3808	0																							418.517	I73	266602	-29027	137971	4670111	9.82939e+07
424.233	I74	210473	-19234	146396	4.63542e+06		99640721		4.12835	-0.447995	3.14641	9.56575	0	85.3808	0																							424.233	I74	210473	-19234	146396	4.63542e+06	99640721
429.95	I75	167022	-3660.25	160891	4.62124e+06		9.81988e+07		3.32417	-0.0865057	3.50871	9.67649	0	85.3808	0																							429.95	I75	167022	-3660.25	160891	4.62124e+06	9.81988e+07
435.667	I76	237570	-23182.6	140002	4.60083e+06		9.85782e+07		4.71007	-0.545785	3.04141	9.59669	0	85.3808	0																							435.667	I76	237570	-23182.6	140002	4.60083e+06	9.85782e+07
441.4	I77	185209	13929	150948	4.59741e+06		9.75942e+07		3.70898	0.331235	3.31227	9.68625	0	85.3808	0																							441.4	I77	185209	13929	150948	4.59741e+06	9.75942e+07
447.117	I78	183426	-5995.38	149385	4536541		9.81193e+07		3.65362	-0.141808	3.26043	9.50685	0	85.3808	0																							447.117	I78	183426	-5995.38	149385	4536541	9.81193e+07
452.85	I79	196080	-780.625	150725	4.59965e+06		9.78903e+07		3.91481	-0.0185073	3.29737	9.66165	0	85.3808	0																							452.85	I79	196080	-780.625	150725	4.59965e+06	9.78903e+07
458.583	I80	172682	-232.25	146528	4.54186e+06		9.81387e+07		3.43893	-0.00549232	3.19745	9.51611	0	85.3808	0																							458.583	I80	172682	-232.25	146528	4.54186e+06	9.81387e+07
464.333	I81	172735	-5189.25	154570	4.58093e+06		9.76428e+07		3.45746	-0.12334	3.39005	9.64672	0	85.3808	0																							464.333	I81	172735	-5189.25	154570	4.58093e+06	9.76428e+07
470.067	I82	248006	-32086	132158	4.56456e+06		9.80531e+07		4.9433	-0.759442	2.88639	9.57204	0	85.3808	0																							470.067	I82	248006	-32086	132158	4.56456e+06	9.80531e+07
475.783	I83	176550	-2901.5	162879	4.58757e+06		9.78549e+07		3.52616	-0.0688146	3.56456	9.63978	0	85.3808	0																							475.783	I83	176550	-2901.5	162879	4.58757e+06	9.78549e+07
481.483	I84	158205	794.25	138294	4.52576e+06		9.83205e+07		3.14479	0.0187479	3.01219	9.46484	0	85.3808	0																							481.483	I84	158205	794.25	138294	4.52576e+06	9.83205e+07
487.217	I85	189658	-6747.88	141526	4.57556e+06		9.79342e+07		3.7849	-0.159909	3.09475	9.60675	0	85.3808	0																							487.217	I85	189658	-6747.88	141526	4.57556e+06	9.79342e+07
492.95	I86	157964	-6773.12	149491	4.50124e+06		9.71092e+07		3.17917	-0.161871	3.29668	9.53098	0	85.3808	0																							492.95	I86	157964	-6773.12	149491	4.50124e+06	9.71092e+07
498.683	I87	178516	-2687.5	144462	4.5515e+06		9.69866e+07		3.59735	-0.0643098	3.1898	9.64959	0	85.3808	0																							498.683	I87	178516	-2687.5	144462	4.5515e+06	9.69866e+07
504.417	I88	202904	-13964.4	147105	4.5083e+06		9.66185e+07		4.10437	-0.33543	3.26054	9.59442	0	85.3808	0																							504.417	I88	202904	-13964.4	147105	4.5083e+06	9.66185e+07
510.133	I89	176271	-1112.38	159602	4.54884e+06		9.72218e+07		3.54351	-0.0265539	3.51559	9.62062	0	85.3808	0																							510.133	I89	176271	-1112.38	159602	4.54884e+06	9.72218e+07
515.883	I90	176012	-15308.5	160404	4.5017e+06		9.71026e+07		3.54264	-0.365883	3.53759	9.53261	0	85.3808	0																							515.883	I90	176012	-15308.5	160404	4.5017e+06	9.71026e+07
521.633	I91	180994	-1159.12	148313	4570662		9.79822e+07		3.61022	-0.0274551	3.24157	9.59176	0	85.3808	0																							521.633	I91	180994	-1159.12	148313	4570662	9.79822e+07
527.35	I92	182586	-3197.25	152550	4.49965e+06		9.73568e+07		3.66536	-0.0762167	3.35558	9.50338	0	85.3808	0																							527.35	I92	182586	-3197.25	152550	4.49965e+06	9.73568e+07
533.067	I93	187336	-5747.88	155486	4.54559e+06		9.78938e+07		3.74009	-0.136268	3.4014	9.54777	0	85.3808	0																							533.067	I93	187336	-5747.88	155486	4.54559e+06	9.78938e+07
538.783	I94	174010	430.375	153487	4.47523e+06		9.70242e+07		3.50518	0.0102945	3.38777	9.48422	0	85.3808	0																							538.783	I94	174010	430.375	153487	4.47523e+06	9.70242e+07
544.483	I95	183010	-697	146340	4550895		98106134		3.64583	-0.0164883	3.19439	9.53821	0	85.3808	0																							544.483	I95	183010	-697	146340	4550895	98106134
550.233	I96	188299	-6216.5	153434	4.47819e+06		9.78363e+07		3.76154	-0.147464	3.35849	9.41171	0	85.3808	0																							550.233	I96	188299	-6216.5	153434	4.47819e+06	9.78363e+07
555.983	I97	174662	-9802.12	147599	4.55987e+06		98514925		3.46508	-0.230918	3.20851	9.51737	0	85.3808	0																							555.983	I97	174662	-9802.12	147599	4.55987e+06	98514925
561.7	I98	188809	-24469.9	150369	4.48422e+06		9.74612e+07		3.78624	-0.582693	3.30407	9.46065	0	85.3808	0																							561.7	I98	188809	-24469.9	150369	4.48422e+06	9.74612e+07
567.45	I99	194390	-31750.5	133633	4.55005e+06		9.80695e+07		3.87397	-0.751375	2.91811	9.53999	0	85.3808	0																							567.45	I99	194390	-31750.5	133633	4.55005e+06	9.80695e+07
573.183	I100	177564	-4508.75	150388	4.44717e+06		96561950		3.5939	-0.108365	3.33526	9.46987	0	85.3808	0																							573.183	I100	177564	-4508.75	150388	4.44717e+06	96561950
578.9	I101	186818	-3462.25	149624	4.53922e+06		97413380		3.74815	-0.0824859	3.28931	9.5814	0	85.3808	0																							578.9	I101	186818	-3462.25	149624	4.53922e+06	97413380
584.65	I102	195709	-4719.5	152319	4.46743e+06		9.73393e+07		3.92951	-0.112525	3.35112	9.43705	0	85.3808	0																							584.65	I102	195709	-4719.5	152319	4.46743e+06	9.73393e+07
590.4	I103	180219	7462.62	147109	4.5453e+06		9.79117e+07		3.59736	0.176888	3.21757	9.5454	0	85.3808	0																							590.4	I103	180219	7462.62	147109	4.5453e+06	9.79117e+07
596.1	I104	155029	6267.62	145063	4.44581e+06		9.74239e+07		3.11003	0.149306	3.18871	9.38322	0	85.3808	0																							596.1	I104	155029	6267.62	145063	4.44581e+06	9.74239e+07
601.817	I105	213359	-31287.4	128483	4.54613e+06		9.76399e+07		4.27072	-0.743673	2.81799	9.57372	0	85.3808	0																							601.817	I105	213359	-31287.4	128483	4.54613e+06	9.76399e+07
607.567	I106	198699	-23316.6	134605	4443238		97120001		3.99857	-0.557182	2.96807	9.40713	0	85.3808	0																							607.567	I106	198699	-23316.6	134605	4443238	97120001
613.317	I107	176102	5748.5	148420	4.51454e+06		9.79401e+07		3.51414	0.136218	3.24529	9.47805	0	85.3808	0																							613.317	I107	176102	5748.5	148420	4.51454e+06	9.79401e+07
619.05	I108	175202	-4910.12	152362	4.42336e+06		9.72306e+07		3.5217	-0.117201	3.35581	9.35439	0	85.3808	0																							619.05	I108	175202	-4910.12	152362	4.42336e+06	9.72306e+07
624.75	I109	209991	-18355.9	132051	4.5492e+06		9.81357e+07		4.18206	-0.434099	2.88162	9.53179	0	85.3808	0																							624.75	I109	209991	-18355.9	132051	4.5492e+06	9.81357e+07
630.483	I110	174298	-5201.88	152734	4.42384e+06		9.77488e+07		3.48497	-0.123506	3.34616	9.30581	0	85.3808	0																							630.483	I110	174298	-5201.88	152734	4.42384e+06	9.77488e+07
636.183	I111	251970	-37188.4	137617	4.55342e+06		9.82019e+07		5.0147	-0.878876	3.00105	9.53421	0	85.3808	0																							636.183	I111	251970	-37188.4	137617	4.55342e+06	9.82019e+07
641.933	I112	181743	1126.88	160432	4.42466e+06		9.75252e+07		3.64214	0.0268163	3.52286	9.32888	0	85.3808	0																							641.933	I112	181743	1126.88	160432	4.42466e+06	9.75252e+07
647.65	I113	185228	-9856.88	146854	4.51563e+06		9.81434e+07		3.68861	-0.233087	3.20441	9.46071	0	85.3808	0																							647.65	I113	185228	-9856.88	146854	4.51563e+06	9.81434e+07
653.383	I114	179248	-6258.62	142593	4.42372e+06		9.79984e+07		3.57481	-0.148218	3.11603	9.28186	0	85.3808	0																							653.383	I114	179248	-6258.62	142593	4.42372e+06	9.79984e+07
659.117	I115	255084	-31337.1	142156	4.56671e+06		98905586		5.04057	-0.735324	3.07799	9.49399	0	85.3808	0																							659.117	I115	255084	-31337.1	142156	4.56671e+06	98905586
664.833	I116	229958	-25328.1	142312	4.45799e+06		9.75876e+07		4.60544	-0.60235	3.12298	9.39314	0	85.3808	0																							664.833	I116	229958	-25328.1	142312	4.45799e+06	9.75876e+07
670.567	I117	243439	-25216.5	119091	4.52707e+06		9.77256e+07		4.86854	-0.598848	2.60972	9.52522	0	85.3808	0																							670.567	I117	243439	-25216.5	119091	4.52707e+06	9.77256e+07
676.3	I118	257578	-27996.9	129281	4.43401e+06		9.68889e+07		5.19578	-0.670619	2.85747	9.40999	0	85.3808	0																							676.3	I118	257578	-27996.9	129281	4.43401e+06	9.68889e+07
682.017	I119	166075	-976.75	152346	4.50905e+06		9.75406e+07		3.32764	-0.0232401	3.34479	9.50531	0	85.3808	0																							682.017	I119	166075	-976.75	152346	4.50905e+06	9.75406e+07
687.75	I120	167278	1060.25	156289	4.41044e+06		9.75277e+07		3.35219	0.0252302	3.43181	9.29865	0	85.3808	0																							687.75	I120	167278	1060.25	156289	4.41044e+06	9.75277e+07
693.5	I121	242262	-42372.5	131184	4.52483e+06		9.8368e+07		4.81335	-0.999702	2.85593	9.45833	0	85.3808	0																							693.5	I121	242262	-42372.5	131184	4.52483e+06	9.8368e+07
699.233	I122	235930	-44067.2	129607	4.45625e+06		9.80145e+07		4.70445	-1.04344	2.83178	9.34858	0	85.3808	0																							699.233	I122	235930	-44067.2	129607	4.45625e+06	9.80145e+07
704.983	I123	241795	-19528.9	132341	4.47606e+06		9.84024e+07		4.8024	-0.460587	2.88013	9.35312	0	85.3808	0																							704.983	I123	241795	-19528.9	132341	4.47606e+06	9.84024e+07
710.717	I124	229889	-37849.9	124289	4.43918e+06		9.79288e+07		4.58801	-0.897004	2.71798	9.32092	0	85.3808	0																							710.717	I124	229889	-37849.9	124289	4.43918e+06	9.79288e+07
716.467	I125	203699	-33407.2	130852	4.42765e+06		9.85075e+07		4.04145	-0.787067	2.84467	9.2421	0	85.3808	0																							716.467	I125	203699	-33407.2	130852	4.42765e+06	9.85075e+07
722.2	I126	220794	-35835.9	131497	4.46583e+06		9.83628e+07		4.38705	-0.845526	2.86292	9.3355	0	85.3808	0																							722.2	I126	220794	-35835.9	131497	4.46583e+06	9.83628e+07
727.95	I127	262211	-36119.6	131770	4.43245e+06		9.91082e+07		5.17079	-0.845812	2.84728	9.19602	0	85.3808	0																							727.95	I127	262211	-36119.6	131770	4.43245e+06	9.91082e+07
733.683	I128	246369	-21752.8	144187	4448053		9.80468e+07		4.91099	-0.514898	3.1493	9.32831	0	85.3808	0																							733.683	I128	246369	-21752.8	144187	4448053	9.80468e+07
739.383	I129	202361	-41157.8	137795	4.41869e+06		9.87119e+07		4.00659	-0.967659	2.98943	9.2043	0	85.3808	0																							739.383	I129	202361	-41157.8	137795	4.41869e+06	9.87119e+07
745.133	I130	183410	-3670.12	157891	4.41147e+06		9.76008e+07		3.67271	-0.0872705	3.46439	9.29386	0	85.3808	0																							745.133	I130	183410	-3670.12	157891	4.41147e+06	9.76008e+07
750.85	I131	192245	-23031.5	139712	4.3559e+06		9.85162e+07		3.81385	-0.542569	3.03704	9.09152	0	85.3808	0																							750.85	I131	192245	-23031.5	139712	4.3559e+06	9.85162e+07
756.567	I132	188671	-3376.38	149941	4.42229e+06		9.79228e+07		3.76563	-0.0800216	3.27913	9.28603	0	85.3808	0																							756.567	I132	188671	-3376.38	149941	4.42229e+06	9.79228e+07
762.283	I133	192873	-22448.8	141366	4.35947e+06		9.74692e+07		3.86741	-0.534521	3.106	9.19672	0	85.3808	0																							762.283	I133	192873	-22448.8	141366	4.35947e+06	9.74692e+07
768.017	I134	174908	-7519.25	140865	4.4256e+06		9.80703e+07		3.48569	-0.177941	3.07601	9.279	0	85.3808	0																							768.017	I134	174908	-7519.25	140865	4.4256e+06	9.80703e+07
773.75	I135	199056	-24838.2	143568	4.40162e+06		9.79933e+07		3.97004	-0.588254	3.13749	9.23596	0	85.3808	0																							773.75	I135	199056	-24838.2	143568	4.40162e+06	9.79933e+07
779.483	I136	200614	-14306.6	128314	4.4307e+06		9.81598e+07		3.99434	-0.338254	2.79938	9.28121	0	85.3808	0																							779.483	I136	200614	-14306.6	128314	4.4307e+06	9.81598e+07
785.233	I137	208561	-24455.6	143783	4.34286e+06		97292171		4.18959	-0.583366	3.16484	9.17833	0	85.3808	0																							785.233	I137	208561	-24455.6	143783	4.34286e+06	97292171
790.933	I138	212254	-26710.2	136171	4423955		9.76137e+07		4.24973	-0.635049	2.98743	9.31894	0	85.3808	0																							790.933	I138	212254	-26710.2	136171	4423955	9.76137e+07
796.65	I139	230533	-26516.6	132900	4.35238e+06		9.75276e+07		4.6198	-0.631002	2.91824	9.17625	0	85.3808	0																							796.65	I139	230533	-26516.6	132900	4.35238e+06	9.75276e+07
802.4	I140	211237	-33230.4	139829	4439853		9.74604e+07		4.23603	-0.791311	3.07249	9.36713	0	85.3808	0																							802.4	I140	211237	-33230.4	139829	4439853	9.74604e+07
808.15	I141	236166	-23200.6	121406	4.35703e+06		9.71403e+07		4.75155	-0.554295	2.67649	9.2227	0	85.3808	0																							808.15	I141	236166	-23200.6	121406	4.35703e+06	9.71403e+07
813.867	I142	166930	-866.25	142526	4.43706e+06		9.82969e+07		3.31904	-0.0204524	3.10512	9.28158	0	85.3808	0																							813.867	I142	166930	-866.25	142526	4.43706e+06	9.82969e+07
819.6	I143	184188	-21584.5	138456	4.35992e+06		9.79261e+07		3.67603	-0.511545	3.02787	9.15474	0	85.3808	0																							819.6	I143	184188	-21584.5	138456	4.35992e+06	9.79261e+07
825.35	I144	180810	865.625	140156	4.40846e+06		9.85164e+07		3.58699	0.0203921	3.04668	9.20121	0	85.3808	0																							825.35	I144	180810	865.625	140156	4.40846e+06	9.85164e+07
831.067	I145	217950	-37617.4	130046	4.34645e+06		9.78486e+07		4.3533	-0.892225	2.84621	9.1337	0	85.3808	0																							831.067	I145	217950	-37617.4	130046	4.34645e+06	9.78486e+07
836.8	I146	210374	-20208	140218	4.43317e+06		9.83981e+07		4.17852	-0.476625	3.05168	9.2639	0	85.3808	0																							836.8	I146	210374	-20208	140218	4.43317e+06	9.83981e+07
842.5	I147	226990	-26026.2	127320	4352214		9.74595e+07		4.55198	-0.619766	2.79766	9.18232	0	85.3808	0																							842.5	I147	226990	-26026.2	127320	4352214	9.74595e+07
848.217	I148	194520	-12881	130582	4.41101e+06		9.831e+07		3.86708	-0.304083	2.84452	9.22585	0	85.3808	0																							848.217	I148	194520	-12881	130582	4.41101e+06	9.831e+07
853.95	I149	207618	-23942.1	134050	4.34512e+06		9.78833e+07		4.14546	-0.567668	2.93278	9.12767	0	85.3808	0																							853.95	I149	207618	-23942.1	134050	4.34512e+06	9.78833e+07
859.683	I150	188071	-14610.6	141805	4.41767e+06		9.85133e+07		3.73116	-0.344203	3.08262	9.22071	0	85.3808	0																							859.683	I150	188071	-14610.6	141805	4.41767e+06	9.85133e+07
865.433	I151	209110	-13483.5	133625	4.37609e+06		9.79667e+07		4.17169	-0.319422	2.92101	9.18491	0	85.3808	0																							865.433	I151	209110	-13483.5	133625	4.37609e+06	9.79667e+07
871.15	I152	190236	-5555.25	142709	4.3519e+06		9.85725e+07		3.77184	-0.130794	3.1004	9.07798	0	85.3808	0																							871.15	I152	190236	-5555.25	142709	4.3519e+06	9.85725e+07
876.917	I153	197296	-25121.4	150843	4.34875e+06		9.78202e+07		3.9419	-0.596012	3.30231	9.14119	0	85.3808	0																							876.917	I153	197296	-25121.4	150843	4.34875e+06	9.78202e+07
882.633	I154	189449	7603.75	154873	4311772		9.93149e+07		3.72817	0.177686	3.33952	8.92705	0	85.3808	0																							882.633	I154	189449	7603.75	154873	4311772	9.93149e+07
888.35	I155	204393	-32954.9	130543	4358141		9.80423e+07		4.07445	-0.780093	2.85143	9.14016	0	85.3808	0																							888.35	I155	204393	-32954.9	130543	4358141	9.80423e+07
894.1	I156	188064	-15347.9	136909	4.31971e+06		9.7935e+07		3.75305	-0.363706	2.99376	9.06949	0	85.3808	0																							894.1	I156	188064	-15347.9	136909	4.31971e+06	9.7935e+07
899.817	I157	185427	-25188.4	133214	4.34977e+06		9.81809e+07		3.69115	-0.595406	2.90566	9.10973	0	85.3808	0																							899.817	I157	185427	-25188.4	133214	4.34977e+06	9.81809e+07
905.55	I158	217578	-24400.6	142702	4.27969e+06		9.77344e+07		4.35095	-0.57942	3.12685	9.00392	0	85.3808	0																							905.55	I158	217578	-24400.6	142702	4.27969e+06	9.77344e+07

## Sheet: Hydride
time [min]:	Peak name	A/B	C	Riv 1	Riv 2	[A/B	`[C]	Sum Hyds	%			1	2
0.0166667	I0	-4200.11	-8871.47	-67.3168	-142.187	-0.000850371	-0.00179615	-0.00264652	-0.109991	RG Calibration				Flow Calibration
5.83333	I1	-14263.9	-2605.69	-228.613	-41.7624	-0.00288792	-0.000527558	-0.00341548	-0.141949		Hyd 1	Hyd 2			Hyd1	Hyd 2	1-hexene
11.55	I2	497404	43044.1	7972.08	689.885	0.100706	0.00871488	0.109421	4.54761	CF	0.9894	0.9894		0 mL/min	4.56654e+06	4.56654e+06	29142933
17.2833	I3	1.06263e+06	52496.9	17031.1	841.389	0.215143	0.0106287	0.225772	9.38321	RG Hyd	203	203		4 mL/min	4.44376e+06	4.44376e+06	6.75363e+06
23.0167	I4	1.43451e+06	50805.7	22991.5	814.282	0.290437	0.0102863	0.300723	12.4982	RG 1H	3.2	3.2		CF	1.02763	1.02763	4.31515
28.7333	I5	1.61371e+06	101872	25863.5	1632.75	0.326717	0.0206255	0.347343	14.4358	Int TMB	60829980	60829980
34.45	I6	1.7638e+06	101174	28269.1	1621.55	0.357105	0.020484	0.377589	15.6928	[TMB]	85.3808	85.3808
40.1833	I7	1.88483e+06	145800	30208.9	2336.79	0.38161	0.0295192	0.411129	17.0868
45.9	I8	1.94322e+06	116928	31144.8	1874.05	0.393432	0.0236737	0.417106	17.3351	IRF	64.1171	64.1171
51.6333	I9	2.00115e+06	191367	32073.2	3067.11	0.405161	0.0387449	0.443906	18.449
57.35	I10	2.05962e+06	151801	33010.3	2432.98	0.416998	0.0307343	0.447732	18.608
63.0667	I11	2.1369e+06	146949	34248.9	2355.21	0.432645	0.0297518	0.462397	19.2175
68.7833	I12	2.12405e+06	172182	34042.9	2759.62	0.430043	0.0348606	0.464904	19.3217
74.4833	I13	2.19683e+06	161126	35209.4	2582.43	0.444778	0.0326222	0.4774	19.841
80.2333	I14	2.17775e+06	153265	34903.6	2456.43	0.440915	0.0310305	0.471946	19.6143
85.9333	I15	2.21039e+06	176250	35426.7	2824.83	0.447523	0.0356843	0.483208	20.0824
91.7	I16	2.19779e+06	165149	35224.8	2646.91	0.444973	0.0334368	0.478409	19.883
97.4167	I17	2.20892e+06	173418	35403.2	2779.43	0.447227	0.0351108	0.482337	20.0462
103.15	I18	2.21603e+06	152349	35517.2	2441.76	0.448667	0.0308452	0.479512	19.9288
108.9	I19	2.20495e+06	159458	35339.6	2555.69	0.446423	0.0322844	0.478707	19.8953
114.617	I20	2.23092e+06	205131	35755.8	3287.72	0.451681	0.0415316	0.493212	20.4982
120.367	I21	2.20837e+06	226494	35394.4	3630.1	0.447116	0.0458568	0.492973	20.4882
126.1	I22	2.20321e+06	168689	35311.6	2703.65	0.446069	0.0341535	0.480223	19.9583
131.833	I23	2.21124e+06	175010	35440.4	2804.95	0.447697	0.0354332	0.48313	20.0791
137.583	I24	2.21918e+06	187758	35567.7	3009.27	0.449304	0.0380142	0.487319	20.2532
143.317	I25	2.21534e+06	210186	35506.1	3368.73	0.448527	0.0425551	0.491082	20.4096
149.083	I26	2.18943e+06	190164	35090.8	3047.84	0.443281	0.0385014	0.481782	20.0231
154.8	I27	2.19608e+06	169346	35197.5	2714.17	0.444627	0.0342864	0.478914	19.9039
160.55	I28	2.18039e+06	196056	34946	3142.27	0.441451	0.0396943	0.481145	19.9967
166.283	I29	2.16949e+06	218401	34771.3	3500.4	0.439244	0.0442184	0.483462	20.093
172.017	I30	2.12067e+06	205378	33988.8	3291.68	0.429359	0.0415817	0.470941	19.5726
177.8	I31	2.15971e+06	190988	34614.5	3061.04	0.437263	0.0386682	0.475931	19.78
183.55	I32	2.16098e+06	171936	34634.8	2755.68	0.43752	0.0348108	0.472331	19.6303
189.317	I33	2.15242e+06	207296	34497.7	3322.41	0.435787	0.0419699	0.477757	19.8558
195.083	I34	2.13475e+06	187639	34214.4	3007.36	0.432209	0.0379901	0.470199	19.5417
200.817	I35	2.1236e+06	192796	34035.8	3090.01	0.429953	0.0390342	0.468987	19.4914
206.567	I36	2.08904e+06	183493	33481.8	2940.91	0.422954	0.0371507	0.460105	19.1222
212.3	I37	2.0542e+06	147320	32923.4	2361.16	0.415901	0.0298271	0.445728	18.5247
218.067	I38	2.08002e+06	179488	33337.3	2876.72	0.421129	0.0363397	0.457469	19.0126
223.817	I39	2.11335e+06	193149	33871.6	3095.68	0.427878	0.0391057	0.466984	19.4081
229.567	I40	2.07547e+06	215063	33264.3	3446.9	0.420207	0.0435425	0.46375	19.2737
235.283	I41	2.11129e+06	149537	33838.5	2396.69	0.427461	0.0302758	0.457736	19.0238			Rh concentration
241.033	I42	2.08781e+06	194686	33462.1	3120.32	0.422706	0.039417	0.462123	19.2061			actual weight (g)	0.0131
246.783	I43	2.03213e+06	150139	32569.7	2406.33	0.411432	0.0303977	0.44183	18.3627			MW RhHCO(PPh3)3 (g/mol)	918.78
252.517	I44	2.05875e+06	202280	32996.4	3242.03	0.416822	0.0409545	0.457777	19.0255			MW Rh(acac)(CO)2 (g/mol)	258.03
258.217	I45	2.04532e+06	180555	32781.1	2893.83	0.414103	0.0365559	0.450659	18.7296			Number of mol (n)	5.07693e-05
263.95	I46	2.03999e+06	226326	32695.7	3627.42	0.413024	0.0458229	0.458847	19.0699			actual volume of reaction (L)	0.0211
269.683	I47	2.03174e+06	207528	32563.4	3326.13	0.411353	0.0420169	0.45337	18.8423			[Rh] (M)	0.00240613
275.383	I48	2.04267e+06	159280	32738.6	2552.84	0.413566	0.0322484	0.445815	18.5283			[Rh] (mM)	2.40613
281.1	I49	2.02554e+06	168349	32464.1	2698.19	0.410099	0.0340846	0.444183	18.4605
286.833	I50	2.03048e+06	193143	32543.3	3095.58	0.411099	0.0391046	0.450204	18.7107
292.533	I51	2.03656e+06	179109	32640.7	2870.66	0.412329	0.0362632	0.448592	18.6437
298.25	I52	2.00398e+06	190226	32118.5	3048.83	0.405733	0.0385139	0.444247	18.4632
303.983	I53	2.04235e+06	203791	32733.6	3266.24	0.413503	0.0412603	0.454763	18.9002
309.717	I54	1.97542e+06	156023	31660.9	2500.65	0.399952	0.0315891	0.431541	17.9351
315.45	I55	1.95379e+06	152013	31314.2	2436.37	0.395573	0.0307772	0.42635	17.7193
321.183	I56	1.97352e+06	174374	31630.4	2794.76	0.399567	0.0353045	0.434872	18.0735			16.583
326.9	I57	1.97779e+06	178608	31698.9	2862.62	0.400432	0.0361617	0.436593	18.1451
332.633	I58	1.9692e+06	167085	31561.1	2677.93	0.398692	0.0338286	0.432521	17.9758
338.383	I59	1.98443e+06	169448	31805.2	2715.81	0.401775	0.0343072	0.436083	18.1238
344.133	I60	1.90841e+06	153334	30586.8	2457.54	0.386384	0.0310446	0.417428	17.3486
349.85	I61	1.95153e+06	161342	31278	2585.9	0.395115	0.032666	0.427781	17.7788
355.55	I62	1.90967e+06	214628	30607	3439.93	0.38664	0.0434545	0.430094	17.8749
361.283	I63	1.93817e+06	171565	31063.9	2749.75	0.39241	0.0347358	0.427146	17.7524
367	I64	1.93002e+06	130784	30933.2	2096.13	0.39076	0.0264791	0.417239	17.3407
372.75	I65	1.93984e+06	138804	31090.5	2224.66	0.392747	0.0281027	0.42085	17.4908
378.483	I66	1.89609e+06	166969	30389.3	2676.07	0.383889	0.0338052	0.417694	17.3596
384.233	I67	1.90773e+06	196241	30575.9	3145.23	0.386246	0.0397317	0.425978	17.7039
389.933	I68	1.89123e+06	207790	30311.4	3330.34	0.382905	0.04207	0.424975	17.6622
395.65	I69	1.89139e+06	177765	30314	2849.12	0.382938	0.0359911	0.418929	17.4109
401.35	I70	1.88519e+06	154564	30214.7	2477.26	0.381683	0.0312936	0.412977	17.1635
407.067	I71	1.8608e+06	191866	29823.7	3075.12	0.376744	0.038846	0.41559	17.2722
412.783	I72	1.86709e+06	171276	29924.5	2745.1	0.378018	0.0346772	0.412695	17.1518
418.533	I73	1.87428e+06	159614	30039.9	2558.2	0.379475	0.0323161	0.411791	17.1143
424.25	I74	1.82656e+06	150007	29275	2404.23	0.369813	0.0303711	0.400184	16.6319
429.95	I75	1.83026e+06	187571	29334.2	3006.28	0.370561	0.0379764	0.408537	16.979
435.667	I76	1.82942e+06	143997	29320.8	2307.89	0.370391	0.0291541	0.399545	16.6053
441.417	I77	1.80313e+06	155944	28899.4	2499.38	0.365068	0.0315731	0.396641	16.4846
447.117	I78	1.77926e+06	145254	28516.9	2328.04	0.360237	0.0294086	0.389645	16.1939
452.85	I79	1.81753e+06	191717	29130.3	3072.72	0.367984	0.0388158	0.4068	16.9068
458.6	I80	1.80506e+06	182280	28930.3	2921.47	0.365459	0.0369051	0.402364	16.7225
464.333	I81	1.78723e+06	196185	28644.6	3144.33	0.361849	0.0397204	0.401569	16.6894
470.067	I82	1.76452e+06	144049	28280.6	2308.74	0.357251	0.0291648	0.386415	16.0596
475.783	I83	1.74099e+06	145479	27903.5	2331.64	0.352488	0.0294542	0.381942	15.8737
481.5	I84	1.73612e+06	203589	27825.5	3263	0.351501	0.0412194	0.392721	16.3217
487.217	I85	1.72529e+06	245471	27651.9	3934.25	0.34931	0.0496989	0.399009	16.583
492.967	I86	1.75096e+06	157377	28063.3	2522.35	0.354506	0.0318632	0.386369	16.0577
498.683	I87	1.71194e+06	143789	27437.9	2304.56	0.346605	0.029112	0.375717	15.615
504.417	I88	1.73859e+06	139926	27865.1	2242.64	0.352002	0.0283299	0.380332	15.8068
510.133	I89	1.69486e+06	145026	27164.1	2324.39	0.343147	0.0293625	0.37251	15.4817
515.883	I90	1.70369e+06	169818	27305.7	2721.74	0.344935	0.034382	0.379317	15.7646
521.633	I91	1.70224e+06	167812	27282.5	2689.58	0.344642	0.0339758	0.378618	15.7356
527.35	I92	1.69517e+06	163704	27169.2	2623.75	0.343212	0.0331442	0.376356	15.6416
533.067	I93	1.67524e+06	150785	26849.8	2416.69	0.339176	0.0305286	0.369705	15.3651
538.783	I94	1.69013e+06	198357	27088.4	3179.14	0.342191	0.0401601	0.382351	15.8907
544.5	I95	1.71142e+06	173092	27429.5	2774.21	0.3465	0.0350448	0.381545	15.8572
550.233	I96	1.66577e+06	148313	26698	2377.06	0.337259	0.030028	0.367287	15.2646
556	I97	1.69874e+06	186861	27226.3	2994.89	0.343933	0.0378326	0.381765	15.8664
561.7	I98	1.68121e+06	165254	26945.5	2648.6	0.340385	0.0334581	0.373843	15.5371
567.45	I99	1.65067e+06	172920	26455.9	2771.46	0.334201	0.0350101	0.369211	15.3446
573.183	I100	1.62369e+06	173546	26023.5	2781.48	0.328739	0.0351367	0.363875	15.1229
578.917	I101	1.63549e+06	123351	26212.6	1976.99	0.331127	0.0249741	0.356101	14.7998
584.667	I102	1.62628e+06	147096	26065	2357.57	0.329263	0.0297817	0.359045	14.9221
590.4	I103	1.61108e+06	162607	25821.4	2606.17	0.326186	0.0329221	0.359108	14.9247
596.117	I104	1.62862e+06	190444	26102.6	3052.32	0.329737	0.038558	0.368295	15.3066
601.833	I105	1.60418e+06	145887	25710.8	2338.18	0.324788	0.0295368	0.354325	14.7259
607.583	I106	1.60335e+06	173431	25697.6	2779.65	0.324621	0.0351135	0.359735	14.9508
613.333	I107	1.57535e+06	193410	25248.7	3099.86	0.318951	0.0391585	0.35811	14.8832
619.05	I108	1.57374e+06	140473	25222.9	2251.41	0.318625	0.0284406	0.347066	14.4243
624.767	I109	1.56559e+06	138452	25092.4	2219.03	0.316976	0.0280316	0.345007	14.3387
630.5	I110	1.5946e+06	169177	25557.2	2711.47	0.322848	0.0342523	0.357101	14.8413
636.2	I111	1.58001e+06	146514	25323.5	2348.23	0.319896	0.0296637	0.349559	14.5279
641.95	I112	1.54657e+06	224324	24787.6	3595.33	0.313126	0.0454176	0.358543	14.9013
647.667	I113	1.47506e+06	96118.5	23641.3	1540.53	0.298646	0.0194605	0.318107	13.2207
653.4	I114	1.5103e+06	205378	24206.1	3291.67	0.30578	0.0415816	0.347362	14.4366
659.133	I115	1.56949e+06	143957	25154.9	2307.25	0.317766	0.029146	0.346912	14.4179
664.85	I116	1.51685e+06	157514	24311.2	2524.54	0.307108	0.0318909	0.338999	14.089
670.583	I117	1.5402e+06	168151	24685.3	2695.02	0.311834	0.0340445	0.345879	14.3749
676.317	I118	1.51601e+06	170013	24297.7	2724.86	0.306937	0.0344215	0.341359	14.1871
682.033	I119	1.51815e+06	170515	24332	2732.91	0.307371	0.0345231	0.341894	14.2093
687.767	I120	1.46202e+06	121652	23432.3	1949.77	0.296006	0.0246302	0.320636	13.3258
693.517	I121	1.4782e+06	105366	23691.6	1688.74	0.299281	0.0213328	0.320614	13.3249
699.25	I122	1.49567e+06	173480	23971.6	2780.43	0.302818	0.0351234	0.337942	14.045
705	I123	1.50896e+06	146001	24184.7	2340.02	0.30551	0.02956	0.33507	13.9257
710.733	I124	1.4238e+06	192517	22819.8	3085.54	0.288268	0.0389777	0.327245	13.6005
716.483	I125	1.45865e+06	112088	23378.4	1796.48	0.295325	0.0226938	0.318019	13.217
722.217	I126	1.46755e+06	169871	23521.1	2722.58	0.297127	0.0343927	0.33152	13.7781
727.95	I127	1.42993e+06	114743	22918.1	1839.02	0.289509	0.0232312	0.312741	12.9977
733.7	I128	1.46498e+06	158297	23479.9	2537.09	0.296606	0.0320494	0.328656	13.6591
739.4	I129	1.40825e+06	145853	22570.5	2337.65	0.285119	0.02953	0.314649	13.077
745.133	I130	1.42123e+06	152693	22778.6	2447.27	0.287747	0.0309148	0.318662	13.2438
750.867	I131	1.39446e+06	174813	22349.6	2801.79	0.282328	0.0353933	0.317721	13.2047
756.583	I132	1.44814e+06	142957	23209.9	2291.22	0.293196	0.0289436	0.322139	13.3883
762.3	I133	1.42098e+06	148812	22774.6	2385.07	0.287697	0.0301291	0.317826	13.209
768.033	I134	1.38777e+06	153577	22242.4	2461.45	0.280974	0.0310939	0.312068	12.9697
773.767	I135	1.4307e+06	172798	22930.3	2769.5	0.289664	0.0349854	0.32465	13.4926
779.483	I136	1.39919e+06	163544	22425.3	2621.18	0.283285	0.0331117	0.316397	13.1496
785.233	I137	1.36624e+06	147822	21897.3	2369.21	0.276614	0.0299287	0.306543	12.7401
790.95	I138	1.37124e+06	162158	21977.4	2598.96	0.277626	0.0328311	0.310457	12.9028
796.667	I139	1.40342e+06	176794	22493.2	2833.55	0.284143	0.0357944	0.319937	13.2968
802.417	I140	1.38438e+06	152497	22188	2444.13	0.280287	0.0308752	0.311163	12.9321
808.15	I141	1.34616e+06	167769	21575.5	2688.9	0.272549	0.0339672	0.306516	12.739
813.883	I142	1.3398e+06	129778	21473.4	2080	0.27126	0.0262753	0.297536	12.3658
819.617	I143	1.31694e+06	124287	21107	1992	0.266632	0.0251637	0.291796	12.1272
825.35	I144	1.30503e+06	177861	20916.2	2850.65	0.264221	0.0360105	0.300231	12.4778
831.067	I145	1.32898e+06	152366	21300	2442.04	0.26907	0.0308487	0.299919	12.4648
836.8	I146	1.35264e+06	150461	21679.2	2411.5	0.27386	0.030463	0.304323	12.6478
842.517	I147	1.27681e+06	140691	20464	2254.91	0.258508	0.0284849	0.286993	11.9276
848.233	I148	1.32247e+06	166901	21195.7	2674.99	0.267752	0.0337915	0.301543	12.5323
853.967	I149	1.28336e+06	123732	20568.9	1983.09	0.259834	0.0250512	0.284885	11.84
859.683	I150	1.27465e+06	101585	20429.4	1628.15	0.258072	0.0205674	0.278639	11.5804
865.433	I151	1.27813e+06	148724	20485.1	2383.66	0.258775	0.0301113	0.288886	12.0063
871.167	I152	1.23521e+06	108549	19797.2	1739.75	0.250085	0.0219772	0.272063	11.3071
876.917	I153	1.22538e+06	117859	19639.7	1888.98	0.248095	0.0238622	0.271958	11.3027
882.633	I154	1.24427e+06	80511.1	19942.4	1290.38	0.25192	0.0163006	0.26822	11.1474
888.35	I155	1.20649e+06	125762	19336.8	2015.64	0.24427	0.0254623	0.269732	11.2102
894.1	I156	1.23255e+06	149806	19754.6	2401	0.249548	0.0303303	0.279878	11.6319
899.833	I157	1.26287e+06	142035	20240.5	2276.46	0.255685	0.028757	0.284442	11.8216
905.55	I158	1.22673e+06	171430	19661.3	2747.58	0.248369	0.0347084	0.283078	11.7649

## Sheet: Phosphorus
time [min]:	Peak name	internal standard #1	OPPh3	PPh3	A/B	V	[PPh3]	[OPPh3]	[A/B]	V		total phosphorus		when phosphorus source is PPH3
0.0166667	I0	1.08694e+08	368175	6.59016e+06	20909.9	-1.96763e+06	1.67676	0.0442929	0.000672973	-0.106452		1.7224
5.73333	I1	1.06518e+08	-76037	6.87708e+06	1.03233e+06	644024	1.78552	-0.00933446	0.0339037	0.0355547		1.84399		INTERNAL REFERENCE (CF SPECTRUM)			FLOW CALIBRATION
11.4667	I2	1.08093e+08	138153	6.43124e+06	4.47433e+06	305690	1.64542	0.0167127	0.144804	0.0166302		1.95174		Triphenylphosphine mass (g)	0.0267			Triphenylphosphosphate	Peak 1	Peak 2	Peak 3
17.2	I3	1.07553e+08	974660	6.85845e+06	8.0744e+06	763779	1.76353	0.118499	0.262625	0.0417599		2.40728		Triphenylphosphine n (moles)	0.000101796		0 mL/min	5.70293e+07	7.98011e+07	3.48921e+06	1.26911e+07	2720052
22.9333	I4	1.07639e+08	1.28585e+06	5.92957e+06	8.91282e+06	2.18119e+06	1.52347	0.156208	0.289664	0.119162		2.259		Reaction Volume (L)	0.0224		4 mL/min	1.74532e+07	1.0222e+07	945257	6.42578e+06	1.02344e+06
28.6333	I5	1.08129e+08	1.0264e+06	7.06477e+06	9.95334e+06	2.1897e+06	1.80692	0.124125	0.322017	0.119086		2.57507		Triphenylphosphine concentration (M)	0.00454445		CF	3.26756	7.80679	3.69128	1.97502	3.32
34.3667	I6	1.09e+08	1.858e+06	7.72545e+06	1.11588e+07	4.50949e+06	1.96011	0.222897	0.358132	0.243287		2.89927		Triphenylphosphine concentration (mM)	4.54445			internal standard			#	acyl cpmplex
40.1	I7	1.09368e+08	1.57509e+06	9.5615e+06	1.2217e+07	4.9583e+06	2.41777	0.188321	0.390773	0.266598		3.38764
45.8167	I8	1.08775e+08	1.47687e+06	9.15851e+06	1.23402e+07	6.46148e+06	2.3285	0.177541	0.396866	0.349317		3.29978
51.5333	I9	1.10136e+08	2.63918e+06	8.77787e+06	1.32288e+07	6.83258e+06	2.20414	0.313346	0.420185	0.364813		3.35786		[Triphenylphosphate] ACTUAL EXPERIMENT
57.25	I10	1.09038e+08	2.30743e+06	9.53244e+06	1.3305e+07	6.68532e+06	2.41772	0.276717	0.426861	0.360546		3.54816		Triphenylphosphate mass (g)	0.0846
62.9667	I11	1.10303e+08	2.49838e+06	1.11747e+07	1.36635e+07	8.57514e+06	2.80175	0.296182	0.433338	0.457164		3.96461		Triphenylphosphate n (moles)	0.000259287
68.6833	I12	111200950	3.77395e+06	1.08496e+07	1.3577e+07	9.6686e+06	2.69827	0.443785	0.427115	0.511295		3.99629		Reaction Volume (L)	0.0224
74.4167	I13	110988598	2.68215e+06	1.04285e+07	1.37074e+07	9.99013e+06	2.59852	0.316002	0.432044	0.529309		3.77861		Triphenylphosphate concentration (M)	0.0115753
80.1333	I14	1.11093e+08	3.22048e+06	9.97036e+06	1.41317e+07	1.1758e+07	2.48202	0.37907	0.445	0.62239		3.75109		Triphenylphosphate concentration (mM)	11.5753
85.8667	I15	1.12143e+08	3.87625e+06	1.19017e+07	1.38693e+07	1.08598e+07	2.93505	0.451984	0.432644	0.569462		4.25232
91.6167	I16	1.1134e+08	3.12502e+06	1.25645e+07	1.45689e+07	1.09652e+07	3.12086	0.367017	0.457748	0.579138		4.40338
97.3333	I17	1.1128e+08	4.13433e+06	1.34195e+07	1.37007e+07	1.30128e+07	3.33505	0.485819	0.430705	0.687656		4.68228
103.083	I18	1.10092e+08	4.02737e+06	1.11086e+07	1.44525e+07	1.24384e+07	2.79052	0.478356	0.459237	0.664395		4.18735
108.817	I19	1.11329e+08	3.55166e+06	1.19307e+07	1.37524e+07	1.21926e+07	2.96372	0.417164	0.432135	0.644025		4.24515
114.55	I20	1.11828e+08	4.18078e+06	1.20429e+07	1.36963e+07	1.35657e+07	2.97826	0.488868	0.428455	0.713359		4.32404
120.283	I21	1.10909e+08	4.08553e+06	12368441	1.37738e+07	1.31457e+07	3.08412	0.481692	0.434449	0.697005		4.43471		when phosphorus source is RhHCOPPh33
126.033	I22	1.10977e+08	4.34745e+06	1.10041e+07	1.41105e+07	1.37597e+07	2.74223	0.512256	0.444795	0.72911		4.14407						CF that are from this reaction
131.75	I23	1.11722e+08	3.60267e+06	1.05632e+07	1.35472e+07	1.26274e+07	2.6148	0.42167	0.424194	0.664652		3.88486		Rh concentration
137.5	I24	1.10099e+08	4.1986e+06	1.16194e+07	1.29986e+07	1.28601e+07	2.91864	0.49866	0.413013	0.686869		4.24332		actual weight (g)	0.0126
143.25	I25	1.11239e+08	4.57895e+06	12715133	1.30568e+07	1.39365e+07	3.16114	0.538261	0.410611	0.736736		4.52062		MW RhHCO(PPh3)3 (g/mol)	918.78
149	I26	1.14226e+08	4.87528e+06	1.19836e+07	1.22785e+07	1.37474e+07	2.90136	0.558108	0.376037	0.707735		4.21154		MW Rh(acac)(CO)2 (g/mol)	258.03
154.7	I27	1.13029e+08	4186202	1.08326e+07	1.45463e+07	1.35541e+07	2.65047	0.484301	0.450209	0.705178		4.03519		Number of mol (n)	4.88315e-05
160.467	I28	1.13067e+08	4.82362e+06	1.19373e+07	13740154	1.33301e+07	2.91979	0.557854	0.425114	0.693285		4.32787		actual volume of reaction (L)	0.0211
166.217	I29	1.12043e+08	5.26351e+06	1.20719e+07	1.39097e+07	1.33946e+07	2.9797	0.614295	0.434296	0.703008		4.46258		[Rh] (M)	0.00231429
171.95	I30	1.12376e+08	4.69899e+06	1.06766e+07	1.28168e+07	1.44406e+07	2.62748	0.546782	0.398984	0.755659		3.97223		[Rh] (mM)	2.31429		[PPh3]	6.94287
177.733	I31	1.11419e+08	4.64116e+06	1.17437e+07	1.35116e+07	1.35179e+07	2.91494	0.544695	0.424227	0.713457		4.30809
183.483	I32	1.1153e+08	4.99087e+06	1.0212e+07	1.27824e+07	1.24143e+07	2.53219	0.585152	0.400932	0.654554		3.91921
189.25	I33	1.12297e+08	4.86165e+06	1.11345e+07	1.43987e+07	1.26851e+07	2.74209	0.566109	0.448544	0.664267		4.20529
195	I34	1.12619e+08	5.04172e+06	1.15241e+07	1.31499e+07	1.3235e+07	2.82995	0.585401	0.408473	0.691086		4.2323
200.733	I35	1.10808e+08	5.06149e+06	1.05273e+07	1.26885e+07	1.39567e+07	2.62739	0.597301	0.40058	0.740678		4.02586
206.5	I36	1.12061e+08	4.58654e+06	1.06289e+07	1.22018e+07	1.35111e+07	2.62309	0.535198	0.380905	0.709006		3.9201
212.233	I37	1.12565e+08	4.97066e+06	1.00779e+07	1.18785e+07	1.45863e+07	2.47597	0.577423	0.369155	0.762001		3.7917
218	I38	1.12101e+08	4.79569e+06	1.17173e+07	1.31075e+07	1.44857e+07	2.89067	0.559407	0.409038	0.759884		4.26816
223.733	I39	1.12584e+08	4.6299e+06	1.11836e+07	1.27818e+07	1.44814e+07	2.74717	0.537751	0.397161	0.756397		4.07925
229.483	I40	1.13459e+08	5.20251e+06	1.18499e+07	1.34269e+07	1.36769e+07	2.88841	0.599598	0.413989	0.708872		4.31598
235.2	I41	1.12507e+08	4.88062e+06	1.171e+07	1.22299e+07	13829493	2.87844	0.567259	0.380271	0.722843		4.20624
240.967	I42	1.1347e+08	4.81645e+06	1.22186e+07	1.29353e+07	1.33085e+07	2.97799	0.555051	0.398792	0.689709		4.33063
246.683	I43	113028718	5.00014e+06	1.12214e+07	1.29579e+07	1.397e+07	2.7456	0.578467	0.401049	0.726813		4.12617
252.433	I44	1.13158e+08	4.43338e+06	1.17201e+07	1.25464e+07	1.41225e+07	2.86434	0.51231	0.387867	0.733906		4.15239
258.15	I45	1.13023e+08	4.85625e+06	1.23211e+07	1.3247e+07	1.42904e+07	3.01484	0.56185	0.410018	0.743522		4.39673
263.867	I46	1.14169e+08	5.16752e+06	1.06405e+07	1.20678e+07	1.48778e+07	2.57746	0.59186	0.36977	0.766312		3.90887
269.583	I47	1.13887e+08	5.8908e+06	1.08928e+07	1.30899e+07	1.45633e+07	2.64513	0.67637	0.402078	0.751973		4.12566
275.283	I48	1.1406e+08	4.98039e+06	9.7815e+06	1.32369e+07	1.43865e+07	2.37165	0.57097	0.405978	0.741715		3.75458
281.033	I49	1.13671e+08	5.02479e+06	1.02282e+07	1.32902e+07	1.42408e+07	2.48846	0.578035	0.409008	0.736717		3.88451
286.733	I50	1.12947e+08	5.16214e+06	1.03651e+07	1.28173e+07	1.37789e+07	2.53791	0.597639	0.396983	0.717387		3.92952											6.51792
292.45	I51	1.12332e+08	5.45216e+06	1.12076e+07	1.24363e+07	1.37618e+07	2.75925	0.634675	0.387293	0.720424		4.16851											7.45221
298.183	I52	1.14092e+08	5.07735e+06	9510321	1.36998e+07	1.46973e+07	2.30527	0.581926	0.42006	0.757529		3.72731											6.90797
303.9	I53	1.13267e+08	5.43247e+06	1.08646e+07	1.21589e+07	1.56685e+07	2.65271	0.62716	0.375526	0.813468		4.03092
309.633	I54	1.13797e+08	5.05972e+06	1.09857e+07	1.38074e+07	1.33874e+07	2.66979	0.581407	0.424455	0.691804		4.10011
315.35	I55	1.12193e+08	4.89481e+06	9.71557e+06	1.19801e+07	1.37232e+07	2.39488	0.570501	0.373546	0.719295		3.71248
321.117	I56	1.13432e+08	5.24792e+06	1.07959e+07	1.20431e+07	1.37809e+07	2.63211	0.604976	0.371412	0.714431		3.97991
326.833	I57	1.12437e+08	5.29754e+06	1.02014e+07	1.22116e+07	1.37427e+07	2.50918	0.616097	0.379939	0.71875		3.88515
332.55	I58	1.1414e+08	5.68973e+06	1.14111e+07	1.20805e+07	1.39661e+07	2.76484	0.651837	0.370253	0.719538		4.15718										Object	Integral [abs]	Integral [rel]
338.317	I59	1.13019e+08	5.47566e+06	9.77707e+06	1.10417e+07	1.38597e+07	2.39241	0.633532	0.341769	0.721137		3.70948										Integral 1	1.6066e+06	0.7651
344.033	I60	1.13954e+08	5.82692e+06	1.11977e+07	1.16267e+07	1.39268e+07	2.71756	0.668644	0.356926	0.718682		4.10006										Integral 2	1.63721e+06	0.7797
349.75	I61	1.14085e+08	5.3679e+06	9.97072e+06	1.22034e+07	1.29795e+07	2.41702	0.615265	0.374201	0.669032		3.78069										Integral 3	2.44396e+07	11.6394
355.45	I62	1.14591e+08	5.30682e+06	1.03931e+07	1.10552e+07	1.46737e+07	2.50826	0.605574	0.337493	0.753013		3.78882
361.2	I63	1.13456e+08	5.29559e+06	1.18748e+07	1.10642e+07	1.38581e+07	2.89454	0.610341	0.34115	0.718277		4.18718
366.933	I64	1.13691e+08	5.07305e+06	1.17301e+07	1.23323e+07	1.3626e+07	2.85336	0.583485	0.379464	0.704789		4.19577										Object	Integral [abs]	Integral [rel]
372.667	I65	1.13821e+08	4.82739e+06	1.08757e+07	1.08019e+07	14744908	2.64252	0.554595	0.331994	0.761793		3.8611										Integral 1	1.04717e+07	0.8794
378.417	I66	1.13425e+08	5.36316e+06	1.05922e+07	1.14715e+07	1.38999e+07	2.58261	0.618299	0.353804	0.720643		3.90852										Integral 2	1.22008e+07	1.0247
384.133	I67	1.13109e+08	5354301	1.03341e+07	1.21336e+07	1.30133e+07	2.52672	0.619002	0.37527	0.676561		3.89626										Integral 3	1.68828e+08	14.1785
389.85	I68	1.13661e+08	5837607	9.64399e+06	1.16618e+07	1.50214e+07	2.34653	0.671596	0.358927	0.777167		3.73598
395.55	I69	1.13625e+08	5.23147e+06	9.35054e+06	1.19754e+07	1.40874e+07	2.27584	0.60205	0.368693	0.729076		3.61528
401.25	I70	1.13022e+08	5.19143e+06	9.78715e+06	1.17347e+07	1.43652e+07	2.39483	0.600633	0.363211	0.747422		3.72188
406.983	I71	1.12991e+08	5.03535e+06	1.01447e+07	1.2534e+07	1.56882e+07	2.483	0.582737	0.38806	0.816483		3.84186
412.7	I72	1.12954e+08	5.23261e+06	1.00959e+07	9.80961e+06	1.34361e+07	2.47187	0.605763	0.30381	0.699502		3.68526
418.433	I73	113654254	4.87362e+06	1.0853e+07	1.10882e+07	1.32228e+07	2.64086	0.560726	0.341293	0.684153		3.88417
424.15	I74	1.14086e+08	5.3598e+06	1.02506e+07	1.06596e+07	1.49227e+07	2.48484	0.614328	0.326857	0.769186		3.75288
429.867	I75	1.14413e+08	5.24402e+06	8.52227e+06	1.08329e+07	1.41224e+07	2.05997	0.59934	0.331221	0.725856		3.32175
435.583	I76	1.13905e+08	4.9551e+06	9.98994e+06	1.10172e+07	1.3341e+07	2.42549	0.568844	0.338359	0.688748		3.67105
441.333	I77	1.14676e+08	5.22319e+06	9.2959e+06	1.0543e+07	1.51307e+07	2.24182	0.595594	0.321621	0.775895		3.48066
447.033	I78	1.13756e+08	5.55755e+06	9.67573e+06	1.2139e+07	1.50243e+07	2.35229	0.638843	0.373301	0.776669		3.73773
452.767	I79	113509459	5.50949e+06	1.04419e+07	1.15485e+07	1.34306e+07	2.54408	0.634694	0.355914	0.695792		3.8906
458.517	I80	1.14335e+08	5.61274e+06	8.3161e+06	1.032e+07	1.44351e+07	2.01151	0.641923	0.315758	0.742436		3.28495
464.233	I81	1.14646e+08	5.51976e+06	8.21817e+06	1.07094e+07	1.40597e+07	1.98243	0.629575	0.326784	0.721166		3.26558
469.967	I82	1.14401e+08	5.94484e+06	9.74239e+06	9.48438e+06	1.39559e+07	2.35515	0.679512	0.290022	0.717375		3.6147
475.683	I83	1.14047e+08	5.34904e+06	8.67888e+06	1.03318e+07	1.42663e+07	2.10456	0.613306	0.316916	0.735603		3.3517
481.4	I84	1.14639e+08	4.9224e+06	1.03833e+07	1.03894e+07	1.43685e+07	2.50487	0.561473	0.317035	0.737048		3.70041
487.133	I85	1.14478e+08	4.98311e+06	9.10171e+06	1.16425e+07	1.42307e+07	2.19878	0.569199	0.355776	0.731004		3.47953
492.883	I86	1.14917e+08	5.2063e+06	9.50939e+06	1.07192e+07	1.40031e+07	2.28849	0.592421	0.32631	0.716569		3.53353
498.617	I87	1.13031e+08	5.32708e+06	8.21531e+06	9.94588e+06	1.53897e+07	2.01006	0.61628	0.307821	0.800663		3.24198
504.333	I88	1.14228e+08	5.19303e+06	9.39316e+06	1.09502e+07	1.33377e+07	2.27416	0.594476	0.335351	0.686637		3.53934
510.067	I89	1.13915e+08	5.27101e+06	8.68502e+06	9.78875e+06	1.46937e+07	2.10848	0.605056	0.300604	0.758514		3.31474
515.817	I90	1.13993e+08	5.78004e+06	8.79432e+06	1.06766e+07	1.35716e+07	2.13357	0.663039	0.327647	0.700118		3.4519
521.533	I91	1.13698e+08	5.38505e+06	9.3713e+06	8631867	1.45044e+07	2.27943	0.619329	0.265584	0.750175		3.42993
527.267	I92	1.14245e+08	6.01702e+06	9.23642e+06	1.01669e+07	1.45764e+07	2.23587	0.688697	0.311317	0.750291		3.5472
532.983	I93	1.13877e+08	5.64222e+06	1.03571e+07	9.9228e+06	1.44924e+07	2.51527	0.647887	0.304824	0.748379		3.7728
538.7	I94	1.15039e+08	6.04741e+06	8.82005e+06	10292624	1.56126e+07	2.12035	0.687402	0.312992	0.798083		3.43374
544.417	I95	1.13988e+08	5639518	8.78799e+06	1.07949e+07	1.38301e+07	2.13211	0.646944	0.331291	0.713476		3.44164
550.167	I96	1.15211e+08	5.2892e+06	9.08156e+06	1.05489e+07	1.4589e+07	2.17995	0.600315	0.320305	0.74464		3.42087
555.9	I97	1.1467e+08	5.34163e+06	9.1547e+06	9.73671e+06	1.37573e+07	2.20787	0.609126	0.297038	0.705499		3.41107
561.617	I98	1.14754e+08	5.47493e+06	8.51595e+06	1.00599e+07	1.4238e+07	2.05232	0.623871	0.306672	0.729617		3.28954
567.383	I99	1.1454e+08	5.93226e+06	9.8778e+06	9.22896e+06	1.57884e+07	2.38499	0.677251	0.28187	0.810588		3.62598
573.083	I100	1.14207e+08	5.11232e+06	9.41029e+06	9.79885e+06	1.25716e+07	2.27871	0.585342	0.300146	0.64731		3.46435
578.85	I101	1.142e+08	5.75014e+06	9.78063e+06	9.79462e+06	1.3291e+07	2.36854	0.658412	0.300035	0.684399		3.62703
584.6	I102	1.14599e+08	5.929e+06	7.84571e+06	1.03665e+07	1.44385e+07	1.89335	0.676527	0.316449	0.740896		3.20278
590.317	I103	1.14521e+08	5.22833e+06	8.67465e+06	1.00539e+07	1.49567e+07	2.09483	0.596987	0.307116	0.768014		3.30605
596.033	I104	1.13854e+08	6.2732e+06	8.95914e+06	9.12232e+06	14487171	2.1762	0.720486	0.28029	0.748258		3.45726
601.767	I105	1.15429e+08	5.77252e+06	8.53948e+06	1.13191e+07	1.33032e+07	2.04596	0.653936	0.343041	0.67773		3.38598
607.517	I106	1.15683e+08	5.26097e+06	7.74779e+06	9.61147e+06	1.40125e+07	1.8522	0.594675	0.290649	0.712297		3.02817
613.25	I107	1.13937e+08	5.35906e+06	7.81804e+06	1.0215e+07	1.4059e+07	1.89764	0.615049	0.313635	0.725614		3.13996
618.967	I108	1.15095e+08	5.657e+06	8.39626e+06	1.01146e+07	1.37032e+07	2.01748	0.642709	0.307426	0.700136		3.27504
624.683	I109	1.1409e+08	5.60566e+06	7.51555e+06	9.76165e+06	1.38174e+07	1.82177	0.642485	0.299312	0.712188		3.06288
630.4	I110	1.14639e+08	5.67225e+06	7.19119e+06	7.59309e+06	1.47102e+07	1.73481	0.647009	0.231707	0.75458		2.84523
636.133	I111	1.14359e+08	5347418	8.627e+06	9.59168e+06	1.46062e+07	2.08627	0.611448	0.293411	0.751078		3.28454
641.867	I112	1.14345e+08	5.47407e+06	8.64086e+06	1.00739e+07	1.44675e+07	2.08988	0.626006	0.308199	0.744037		3.33228
647.583	I113	113864012	5.15372e+06	7.41413e+06	8.16172e+06	1.31194e+07	1.80076	0.591861	0.250753	0.677553		2.89412
653.317	I114	1.15605e+08	5.8592e+06	7.27748e+06	9.14052e+06	1.43747e+07	1.74094	0.662744	0.276595	0.731204		2.95688
659.05	I115	1.15441e+08	5.34905e+06	8.14932e+06	9.35808e+06	1.48955e+07	1.95228	0.605902	0.283582	0.758775		3.12535
664.767	I116	1.14829e+08	6.10857e+06	6.90072e+06	9.39908e+06	1.46871e+07	1.66197	0.695621	0.286342	0.752145		2.93027
670.5	I117	1.14992e+08	5.4201e+06	6.56127e+06	9.68033e+06	1.47312e+07	1.57798	0.616347	0.294492	0.753332		2.78331
676.217	I118	1.14062e+08	5.69026e+06	8.12542e+06	8.53289e+06	1.52326e+07	1.97008	0.652342	0.2617	0.785322		3.14582
681.967	I119	1.13536e+08	5.68296e+06	7.22926e+06	9.42879e+06	1.34998e+07	1.76093	0.654526	0.290518	0.699214		2.99649
687.7	I120	113670019	5.35828e+06	8.2171e+06	8.36561e+06	1.36407e+07	1.99919	0.616403	0.257456	0.70568		3.1305
693.433	I121	1.14836e+08	5.78061e+06	8.22586e+06	8.35791e+06	1.35642e+07	1.981	0.658236	0.254608	0.6946		3.14845
699.167	I122	1.1581e+08	5.94328e+06	6.82049e+06	8.47365e+06	1.39138e+07	1.62873	0.671064	0.255961	0.706505		2.81172
704.917	I123	1.14642e+08	5.67389e+06	6.9111e+06	7.46218e+06	1.32634e+07	1.66718	0.647175	0.227705	0.680341		2.76977
710.65	I124	1.13959e+08	6.17436e+06	7.06414e+06	7.78337e+06	1.46403e+07	1.71432	0.70848	0.238929	0.755472		2.90066
716.4	I125	1.15704e+08	5.71834e+06	7.82678e+06	9.15709e+06	1.42307e+07	1.87076	0.646261	0.276861	0.723263		3.07074
722.15	I126	1.14399e+08	6.09916e+06	8.52024e+06	8.31594e+06	1.44178e+07	2.05974	0.697164	0.254297	0.741132		3.2655
727.883	I127	1.14146e+08	6.54669e+06	7.45177e+06	7.7873e+06	1.40858e+07	1.80543	0.749977	0.238659	0.725668		3.03273
733.6	I128	1.14532e+08	6.09005e+06	6.02624e+06	7.77369e+06	1.43124e+07	1.45513	0.695312	0.237439	0.734856		2.62532
739.333	I129	1.13979e+08	6.13631e+06	6.6498e+06	9.38586e+06	1.33087e+07	1.61349	0.703994	0.288073	0.686642		2.89363
745.033	I130	1.14722e+08	6.16927e+06	7.07267e+06	7.97225e+06	1.43855e+07	1.70497	0.703187	0.243099	0.737383		2.89435
750.783	I131	1.15043e+08	6.08058e+06	7.78056e+06	6.64663e+06	1.42019e+07	1.87039	0.691147	0.202112	0.725941		2.96576
756.483	I132	1.13966e+08	5.96118e+06	7762491	8.91927e+06	14813600	1.88367	0.683976	0.273781	0.764364		3.11521
762.217	I133	1.1427e+08	6.27012e+06	6.43245e+06	7.56809e+06	1.46362e+07	1.55677	0.71751	0.231688	0.7532		2.73766
767.95	I134	1.14356e+08	5.92743e+06	8.35408e+06	7.35488e+06	1.38927e+07	2.02032	0.677785	0.224992	0.714405		3.14809
773.683	I135	1.15571e+08	5.42386e+06	6.58809e+06	8.72005e+06	1.48688e+07	1.57649	0.613684	0.26395	0.756562		2.71808
779.4	I136	1.13576e+08	6.25718e+06	6.65371e+06	7.85523e+06	1.4332e+07	1.62016	0.720404	0.241948	0.742055		2.82446
785.15	I137	1.15159e+08	5.90337e+06	6.39442e+06	8.71317e+06	1.47786e+07	1.53562	0.670328	0.264685	0.754659		2.73532
790.867	I138	1.137e+08	5.74585e+06	6.73621e+06	7.59395e+06	1.43276e+07	1.63846	0.660813	0.233646	0.741021		2.76657
796.6	I139	1.14406e+08	6.56465e+06	6.92971e+06	7.92332e+06	1.36131e+07	1.67513	0.750324	0.242276	0.699723		2.91001
802.35	I140	1.14057e+08	6.12738e+06	8.09799e+06	7.6718e+06	1.40398e+07	1.96352	0.702486	0.235302	0.723859		3.13661
808.067	I141	1.14373e+08	6.14362e+06	6.07173e+06	7.55968e+06	1.55574e+07	1.46815	0.702403	0.231223	0.799889		2.633
813.783	I142	1.13724e+08	6.62301e+06	6.33168e+06	7.10438e+06	1.36143e+07	1.53975	0.761536	0.218538	0.703982		2.73836
819.533	I143	1.14726e+08	6.14046e+06	6.17276e+06	7.95525e+06	1.36501e+07	1.48798	0.699878	0.242572	0.699662		2.673
825.267	I144	1.14714e+08	6.36143e+06	6.054e+06	7.28928e+06	1.52991e+07	1.45951	0.725142	0.222289	0.784269		2.62923
830.983	I145	1.13592e+08	5.91268e+06	6.39517e+06	7.71897e+06	1.57098e+07	1.55699	0.680647	0.237718	0.81328		2.71307
836.7	I146	1.14153e+08	5.97755e+06	6.11253e+06	7.32452e+06	1.50543e+07	1.48087	0.684735	0.224462	0.775517		2.61453
842.417	I147	1.14279e+08	6.50619e+06	7.19971e+06	7.83561e+06	1.47016e+07	1.74233	0.744468	0.23986	0.75651		2.96652
848.133	I148	1.14699e+08	6.43567e+06	6.21088e+06	7.98633e+06	1.38571e+07	1.49752	0.733701	0.243578	0.710441		2.71838
853.867	I149	1.14951e+08	5.46607e+06	6.0551e+06	7.68502e+06	1.28502e+07	1.45676	0.621795	0.233875	0.657378		2.54631
859.6	I150	1.14624e+08	6719668	6.59402e+06	7.57948e+06	1.38484e+07	1.59095	0.766579	0.231321	0.710461		2.82017
865.35	I151	1.14217e+08	5.96572e+06	5.82865e+06	7.72034e+06	1.43063e+07	1.41129	0.682993	0.236459	0.736569		2.5672
871.083	I152	1.14071e+08	6.55e+06	6.14966e+06	8.05755e+06	1.41606e+07	1.49092	0.750845	0.247102	0.729999		2.73597
876.833	I153	1.13673e+08	5.69981e+06	6.68825e+06	6.3572e+06	1.46411e+07	1.62718	0.655675	0.195641	0.757411		2.67414
882.533	I154	1.14539e+08	6.21275e+06	7459400	6.81265e+06	1.47839e+07	1.80107	0.709274	0.208071	0.759015		2.92648
888.25	I155	1.13759e+08	6.49702e+06	5.58611e+06	6.96563e+06	1.37975e+07	1.35801	0.746813	0.214202	0.71323		2.53323
894	I156	1.14444e+08	5.98889e+06	6.49111e+06	7.81209e+06	1.32818e+07	1.56857	0.684284	0.238794	0.682462		2.73045
899.75	I157	1.14997e+08	6.54411e+06	6.7732e+06	6.72356e+06	1.58674e+07	1.62887	0.744128	0.204533	0.811397		2.78207
