# Supplementary material for: Mapping catalyst activation, turnover speciation and deactivation in Rh/PPh3-catalysed olefin hydroformylation
Source: Royal Society of Chemistry journal article supplement (doi:10.1039/d2cy00312k), 2022-01-01
Supplement: d2cy00312k3.xlsx [file d2cy00312k3.xlsx]

## Sheet: Proton
time [min]:	Peak name	hydrogen bond #1	acac coordinated #1	acac decoordinatedl #1	Hydrogen #2	TMB aromatic #3	TMB methyl #9	1-hexene (other H double bond)	[1-hexene]	[1-heptanal]	[2-methylhexanal]	[Hydrogen]	[TMB aromatic]	[TMB methyl]	[1-hexene (other H double bond)]
0.0166667	I0	420502	120854	7484.53	1436.88		5.02796e+07		17.203	5.87114	0.335512	0.00618452	0	89.8611	0						INTERNAL REFERENCE			FLOW CALIBRATION
5.83333	I1	320742	112676	5173.83	-4788.98		5.0013e+07		13.1917	5.503	0.233165	-0.0207223	0	89.8611	0						1-hexene Volume (mL)	1.3			1-hexene (initial)	1-hexene (end)	1-heptanal (end)	2-methylhexanal (end)	Hydrogen (end)	TMB aromatic (initial)	TMB methyl (initial)	TMB aromatic (end)	TMB methyl (end)	1-hexene (other H double bond)
11.55	I2	321457	96467.6	20774.4	1.64086e+06		4.98253e+07		13.2709	4.72916	0.939753	7.12687	0	89.8611	0						1-hexene n (moles)	0.0104729		0 mL/min	29142933	4176547	20157390	6.62235e+06	1074285	2.00388e+07	62136918	20500117	6.30756e+07	6.17893e+06
17.2667	I3	360287	71578.3	41595.5	2.14323e+06		4.99641e+07		14.8326	3.49925	1.87639	9.283	0	89.8611	0						Reaction Volume (L)	0.0224		4 mL/min	6.75363e+06	987741	4.8867e+06	1.7202e+06	1.58738e+06	7.57361e+06	3.6012e+07	8.49335e+06	3.78577e+07	1.62179e+06
22.9833	I4	385549	42640.8	59347.3	2.1576e+06		4.99252e+07		15.885	2.08621	2.67927	9.35252	0	89.8611	0						1-hexene (M)	0.467541		CF	4.31515	4.22838	4.12495	3.84975	0.676765	2.64587	1.72545	2.41367	1.66612	3.80995
28.6667	I5	385091	25436.9	58673	2.12295e+06		4.96641e+07		15.9496	1.25105	2.66275	9.25074	0	89.8611	0						1-hexene(mM)	467.541
34.3667	I6	394432	16770.9	73922.9	2.13126e+06		4.96895e+07		16.3281	0.82441	3.35311	9.28217	0	89.8611	0
40.0667	I7	408323	2069.45	74455	2.12554e+06		4.99235e+07		16.8239	0.101252	3.36143	9.21389	0	89.8611	0						# is the number of protons of the peak taken for integration			0 mL	static with long delay (flow+ full relaxtion effects)
45.7667	I8	410825	-4042.54	76845.9	2.11518e+06		4.98897e+07		16.9385	-0.197923	3.47172	9.17517	0	89.8611	0						If #>1 the integration will be divided by the number of protons			4 mL	flow with shot delay (flow + poor relaxiation)
51.45	I9	403456	2939.1	82975.8	2.11973e+06		5.00579e+07		16.5787	0.143415	3.73606	9.16403	0	89.8611	0
57.1333	I10	424105	1199.14	69492.9	2.10997e+06		5.01678e+07		17.3891	0.0583844	3.12212	9.10182	0	89.8611	0										initial CF were calculated under Argon ( the reactor was still no pressurized)
62.8167	I11	417393	-4933.63	74791	2.11011e+06		5.04816e+07		17.0075	-0.238718	3.33926	9.04585	0	89.8611	0						INTERNAL REFERENCE STANDARD				final CF were calculated under 10 bar H2/CO ( reactor pressurized)
68.5167	I12	412750	-2979.02	75363.8	2.11913e+06		5.02534e+07		16.8947	-0.144797	3.38011	9.1258	0	89.8611	0						Mass of TMB (g)	0.3189
74.2167	I13	419529	-223.359	75366.1	2.11911e+06		4.96992e+07		17.3636	-0.0109776	3.41791	9.22745	0	89.8611	0						Molecular weight of TMB (g/mol)	168.19
79.9333	I14	411215	816.953	77200	2.11574e+06		4.97613e+07		16.9983	0.0401012	3.49671	9.2013	0	89.8611	0						Moles of TMB (n)	0.00189607
85.6333	I15	423359	-215.117	68744.3	2.12181e+06		5.00345e+07		17.4048	-0.0105017	3.09672	9.17731	0	89.8611	0						Reaction Volume (L)	0.0211
91.3333	I16	417531	-117.383	66063	2.11193e+06		5.00306e+07		17.1665	-0.00573088	2.97617	9.13527	0	89.8611	0						TMB (M)	0.0898611
97.0333	I17	422821	-1354.3	74093.6	2.11621e+06		5.0246e+07		17.3095	-0.0658362	3.32364	9.11455	0	89.8611	0						TMB (mM)	89.8611		FLOW CALIBRATION
102.733	I18	427412	-2900.04	73964.3	2.09971e+06		5.02663e+07		17.4903	-0.140922	3.31649	9.03981	0	89.8611	0										1-hexene (initial)	1-hexene (end)	1-heptanal (end)	2-methylhexanal (end)	Hydrogen (end)	TMB aromatic (initial)	TMB methyl (initial)	TMB aromatic (end)	TMB methyl (end)	1-hexene (other H double bond)
108.45	I19	421859	986.602	74608.4	2.10211e+06		4.9944e+07		17.3745	0.0482515	3.36697	9.10856	0	89.8611	0									0 mL/min	2.78016e+07	7.53593e+06	1.87317e+07	5722346	4.41821e+06	2.16925e+07	6.43757e+07	2.16584e+07	6.12478e+07	1.44223e+07
114.133	I20	416014	-368.398	70779.1	2.0894e+06		5.01364e+07		17.068	-0.017948	3.1819	9.01874	0	89.8611	0									4 mL/min	6.11977e+06	1757276	3.67838e+06	1.21779e+06	3.89945e+06	7.34342e+06	3.6664e+07	7.98182e+06	3.63252e+07	3.68713e+06
119.833	I21	425373	-2160.16	75504.1	2.09795e+06		5.0046e+07		17.4835	-0.105431	3.40044	9.07204	0	89.8611	0									CF	4.54292	4.28842	5.09238	4.69897	1.13304	2.954	1.75583	2.71347	1.6861	3.91153
125.533	I22	414012	-1717.46	75080.2	2.11398e+06		5.0604e+07		16.8289	-0.0828999	3.34406	9.04054	0	89.8611	0
131.233	I23	429920	-142.539	68086.8	2.09052e+06		5.01693e+07		17.627	-0.00693982	3.05886	9.01769	0	89.8611	0
136.933	I24	424748	956.133	67198.7	2.07553e+06		5.03393e+07		17.3561	0.0463941	3.00876	8.92277	0	89.8611	0
142.617	I25	421469	39.0625	69323.7	2.06819e+06		4.99918e+07		17.3419	0.00190859	3.12548	8.953	0	89.8611	0
148.317	I26	416290	-1505.59	74858.2	2.06799e+06		5.02094e+07		17.0545	-0.0732441	3.36039	8.91336	0	89.8611	0
154.017	I27	410507	-870.781	71866.4	2.06108e+06		5.02353e+07		16.8089	-0.0423402	3.22442	8.87901	0	89.8611	0
159.683	I28	412950	-3862.81	72971.9	2.06481e+06		5.03134e+07		16.8827	-0.18753	3.26893	8.88124	0	89.8611	0
165.4	I29	427085	-4200.59	73405.7	2.06037e+06		5.09076e+07		17.2568	-0.201548	3.24998	8.75869	0	89.8611	0
171.083	I30	422450	-282.344	71815.2	2.11812e+06		5.1003e+07		17.0376	-0.0135218	3.17362	8.98737	0	89.8611	0
176.783	I31	395004	-1846.8	67114.5	2.09107e+06		5.0841e+07		15.9814	-0.0887273	2.97534	8.90086	0	89.8611	0
182.467	I32	418425	-1095.78	65982.8	2.062e+06		5.02091e+07		17.1421	-0.0533081	2.96198	8.8876	0	89.8611	0
188.167	I33	417409	-4074.69	69824.8	2.0454e+06		5.01211e+07		17.1305	-0.198575	3.13996	8.83151	0	89.8611	0
193.85	I34	422546	-741.016	66555.7	2.03257e+06		5.00643e+07		17.361	-0.0361536	2.99634	8.78611	0	89.8611	0
199.567	I35	405259	-2367.5	71913.7	2.02057e+06		4.99434e+07		16.691	-0.115788	3.2454	8.75539	0	89.8611	0
205.267	I36	410956	-41.3672	80758	2.01078e+06		4.9805e+07		16.9727	-0.00202878	3.65466	8.73714	0	89.8611	0
210.983	I37	429769	-1730.55	68320.4	2.01857e+06		5.0046e+07		17.6642	-0.0844629	3.07692	8.72876	0	89.8611	0
216.667	I38	406326	-3235.51	82478.9	2.02186e+06		5.00608e+07		16.6957	-0.157869	3.71347	8.74043	0	89.8611	0
222.383	I39	432132	991.836	70113.4	2.00541e+06		5.01277e+07		17.7324	0.0483297	3.15252	8.65772	0	89.8611	0
228.1	I40	418942	1280.9	69110.7	2.003e+06		4.99095e+07		17.2663	0.0626879	3.12102	8.68513	0	89.8611	0
233.8	I41	434783	-3405.47	70903	2.02197e+06		5.00363e+07		17.8738	-0.166243	3.19385	8.74514	0	89.8611	0
239.517	I42	435345	2544.06	70927.5	1.99436e+06		4.96729e+07		18.0278	0.125101	3.21832	8.68885	0	89.8611	0
245.217	I43	412273	-289.336	70128.4	2.06317e+06		5.02558e+07		16.8744	-0.0140627	3.14516	8.8844	0	89.8611	0
250.917	I44	416807	33.8672	73440.2	2.01876e+06		4.98961e+07		17.1829	0.00165793	3.31743	8.75584	0	89.8611	0
256.617	I45	408980	-1051.21	71380.1	2.07033e+06		5.07175e+07		16.5872	-0.0506272	3.17215	8.83404	0	89.8611	0
262.3	I46	427446	-927.891	69191.2	2.02435e+06		5.04135e+07		17.4406	-0.0449575	3.09342	8.68995	0	89.8611	0
267.983	I47	413928	-726.836	68181.6	2.06853e+06		5.09033e+07		16.7266	-0.0348772	3.01894	8.79415	0	89.8611	0
273.683	I48	424529	-1419.57	68732.7	2.03355e+06		5.06859e+07		17.2285	-0.0684104	3.05641	8.68255	0	89.8611	0
279.367	I49	412395	-3859.02	67091.2	2.03515e+06		5.10438e+07		16.6188	-0.184666	2.96249	8.62845	0	89.8611	0
285.05	I50	408003	-143.438	72027.9	2.03083e+06		5.08764e+07		16.4959	-0.0068865	3.19094	8.63845	0	89.8611	0
290.733	I51	429332	-4675.47	77165	2.00332e+06		50448580		17.5054	-0.226375	3.44751	8.5937	0	89.8611	0
296.45	I52	410223	-1262.93	73892.4	2.03725e+06		5.09032e+07		16.5769	-0.0606018	3.27182	8.6612	0	89.8611	0
302.15	I53	423999	-3843.55	68606.2	1.99844e+06		5.02788e+07		17.3464	-0.186724	3.07548	8.60171	0	89.8611	0
307.85	I54	418230	-4032.38	77013.4	2.04295e+06		5.06696e+07		16.9783	-0.194386	3.42573	8.72546	0	89.8611	0
313.55	I55	417669	-1181.13	70944.5	1.9971e+06		4.99933e+07		17.185	-0.0577084	3.19846	8.64501	0	89.8611	0
319.233	I56	422623	-558.086	77350.4	2.04721e+06		5.08817e+07		17.0852	-0.0267911	3.42638	8.70719	0	89.8611	0
324.933	I57	413464	-3303.48	72157.8	1.99319e+06		5.03452e+07		16.8931	-0.160275	3.23043	8.56782	0	89.8611	0
330.617	I58	405919	-1182.11	72348.7	2.05022e+06		5.11741e+07		16.3161	-0.0564234	3.18651	8.67018	0	89.8611	0
336.3	I59	430596	387.344	78931.6	2.00137e+06		5.07104e+07		17.4663	0.0186574	3.50823	8.54101	0	89.8611	0
341.983	I60	417543	-7695.78	73846.3	2.02859e+06		5.10857e+07		16.8124	-0.367964	3.2581	8.59357	0	89.8611	0
347.683	I61	412684	-2058.28	68701.2	2.00584e+06		5.07429e+07		16.729	-0.099079	3.05157	8.5546	0	89.8611	0
353.383	I62	415796	-52.1484	67604.3	1.98798e+06		5.06162e+07		16.8974	-0.00251654	3.01037	8.49964	0	89.8611	0
359.083	I63	426020	-1170.94	76163	2.01653e+06		5.06129e+07		17.314	-0.0565099	3.3917	8.62229	0	89.8611	0
364.767	I64	408568	-4234.22	71084.3	1.97837e+06		4.99724e+07		16.8175	-0.206964	3.20611	8.56753	0	89.8611	0
370.467	I65	405879	-3800.35	74584.3	2.01705e+06		5.06596e+07		16.4802	-0.183237	3.31833	8.61654	0	89.8611	0
376.15	I66	416916	-1099.06	73393.2	1.97325e+06		5.00894e+07		17.1211	-0.0535955	3.30251	8.52539	0	89.8611	0
381.85	I67	415669	-2070.74	82990.8	2.0191e+06		5.08858e+07		16.8027	-0.0993989	3.67594	8.58696	0	89.8611	0
387.533	I68	414235	-4481.21	67518	1.96972e+06		5.00534e+07		17.0232	-0.218682	3.04033	8.51628	0	89.8611	0
393.233	I69	423216	-5142.85	74504.5	2.02852e+06		5.1037e+07		17.0571	-0.246134	3.29027	8.60147	0	89.8611	0
398.917	I70	423798	-1755.94	76344.3	1.97714e+06		5.05712e+07		17.2379	-0.0848121	3.40258	8.46081	0	89.8611	0
404.6	I71	419114	1792.81	71255.9	2.00738e+06		5.12895e+07		16.8086	0.0853805	3.13132	8.46993	0	89.8611	0
410.283	I72	415538	-174.414	76432.5	1.99163e+06		5.06511e+07		16.8753	-0.00841094	3.40113	8.50937	0	89.8611	0
415.983	I73	403337	-2448.98	69287	1.98137e+06		5.15149e+07		16.1051	-0.116119	3.03147	8.3236	0	89.8611	0
421.65	I74	395353	-142.266	69925.9	1.98691e+06		5.06166e+07		16.0665	-0.00686529	3.11372	8.49498	0	89.8611	0
427.367	I75	418736	-4530.08	71201.8	1.95353e+06		4.9736e+07		17.318	-0.222478	3.22667	8.50016	0	89.8611	0
433.083	I76	434089	597.5	70650	2.00466e+06		5.05856e+07		17.6515	0.0288512	3.1479	8.57615	0	89.8611	0
438.8	I77	422701	2331.88	66570.6	1.95424e+06		50241755		17.306	0.113369	2.98643	8.41767	0	89.8611	0
444.5	I78	415479	-1758.12	71994.6	2.00893e+06		5.09691e+07		16.7676	-0.0842549	3.18367	8.52975	0	89.8611	0
450.217	I79	422433	-3454.96	70850.9	1.95461e+06		5.05506e+07		17.1894	-0.166943	3.15903	8.36782	0	89.8611	0
455.917	I80	423373	-1835.94	68770.4	2.00386e+06		5.11302e+07		17.0324	-0.0877067	3.03151	8.48143	0	89.8611	0
461.633	I81	431875	2150.59	68579.3	1.95832e+06		5.08465e+07		17.4713	0.103311	3.03995	8.33491	0	89.8611	0
467.333	I82	422469	675.352	68443.5	1.98643e+06		5.1088e+07		17.01	0.0322897	3.01959	8.41461	0	89.8611	0
473.05	I83	404456	4980.82	75654.2	1.96717e+06		5.0649e+07		16.4259	0.240205	3.36664	8.40521	0	89.8611	0
478.75	I84	419896	-520.547	64009.3	1.93278e+06		5.00596e+07		17.2537	-0.0253995	2.88198	8.35551	0	89.8611	0
484.467	I85	408771	573.32	68133.3	1.97062e+06		5.07705e+07		16.5614	0.0275828	3.0247	8.3998	0	89.8611	0
490.167	I86	434369	1483.63	75023	1.93593e+06		4.97398e+07		17.9632	0.0728575	3.39958	8.42296	0	89.8611	0
495.883	I87	418571	-143.281	77667.2	1.98508e+06		5.06839e+07		16.9874	-0.00690513	3.45384	8.4759	0	89.8611	0
501.617	I88	414090	5467.58	65579.4	1.93888e+06		4.99927e+07		17.0379	0.267141	2.95662	8.39308	0	89.8611	0
507.333	I89	402524	-1676.68	73978.4	1.99866e+06		5.0935e+07		16.2556	-0.0804055	3.27358	8.4918	0	89.8611	0
513.067	I90	423228	3175.74	76521.8	1.94054e+06		5.03544e+07		17.2888	0.154049	3.42517	8.33993	0	89.8611	0
518.767	I91	416935	3111.17	75749.1	1.98336e+06		5.12897e+07		16.7212	0.148165	3.32875	8.36853	0	89.8611	0
524.517	I92	434302	1972.66	76846.1	1.9486e+06		5.06416e+07		17.6406	0.0951473	3.42018	8.3271	0	89.8611	0
530.233	I93	420141	503.594	72722.3	1.93758e+06		5.12845e+07		16.8514	0.0239854	3.19607	8.1762	0	89.8611	0
535.967	I94	445086	-3127.27	71353	1.96742e+06		5.09012e+07		17.9864	-0.150068	3.15951	8.36465	0	89.8611	0
541.667	I95	429638	3576.72	63725.3	1.92772e+06		5.04165e+07		17.5291	0.173286	2.84888	8.27463	0	89.8611	0
547.383	I96	416173	-388.75	73050.6	1.96613e+06		5.12698e+07		16.6971	-0.0185209	3.21142	8.29908	0	89.8611	0
553.1	I97	431724	1951.64	72885.6	1.92262e+06		5.0135e+07		17.713	0.0950847	3.27669	8.29908	0	89.8611	0
558.817	I98	408612	-1854.73	70629	1.96731e+06		5.08151e+07		16.5404	-0.0891537	3.13274	8.37835	0	89.8611	0
564.517	I99	424641	-2689.1	65743.2	1.9217e+06		5.01731e+07		17.4093	-0.130915	2.95335	8.28882	0	89.8611	0
570.233	I100	431743	345.781	72276.4	1.9784e+06		5.11103e+07		17.3758	0.0165252	3.1873	8.37691	0	89.8611	0
575.933	I101	416613	-4136.17	73324.5	1.93137e+06		5.05258e+07		16.9609	-0.199958	3.27093	8.27238	0	89.8611	0
581.65	I102	419479	96.7578	74063.2	1.96108e+06		5.13486e+07		16.8039	0.00460267	3.25094	8.26504	0	89.8611	0
587.367	I103	424691	-298.125	68433.9	1.93101e+06		5.06017e+07		17.2638	-0.0143908	3.04818	8.25843	0	89.8611	0
593.1	I104	413862	-752.5	70886.9	1.90869e+06		5.05065e+07		16.8553	-0.0363924	3.16339	8.17837	0	89.8611	0
598.817	I105	411682	-3219.3	69780.4	1.9422e+06		5.10159e+07		16.5991	-0.154137	3.08292	8.23887	0	89.8611	0
604.55	I106	426534	-1300.94	72623.1	1.89884e+06		5.06399e+07		17.3256	-0.0627502	3.23233	8.11473	0	89.8611	0
610.267	I107	425900	1972.85	72481.4	1.94576e+06		5.12461e+07		17.0952	0.0940341	3.18787	8.21687	0	89.8611	0
616.017	I108	436808	-1021.48	69319.4	1.90114e+06		5.00889e+07		17.9381	-0.0498129	3.11923	8.21394	0	89.8611	0
621.733	I109	426668	2354.1	69493.6	1.95798e+06		5.08207e+07		17.2694	0.113145	3.08204	8.3377	0	89.8611	0
627.45	I110	406890	-4784.02	69127.5	1.90802e+06		5.03514e+07		16.6224	-0.232078	3.09438	8.20066	0	89.8611	0
633.167	I111	414343	2543.24	70303.6	1.95288e+06		5.10696e+07		16.6888	0.12164	3.10277	8.27544	0	89.8611	0
638.867	I112	409170	-353.086	68166	1.91599e+06		5.05914e+07		16.6362	-0.0170473	3.03687	8.19587	0	89.8611	0
644.6	I113	426687	2322.81	68793.9	1.90936e+06		5.10965e+07		17.177	0.111039	3.03454	8.08678	0	89.8611	0
650.283	I114	421440	-864.805	76976.2	1.92541e+06		5.06626e+07		17.111	-0.0416948	3.42455	8.22459	0	89.8611	0
656.033	I115	441543	833.438	66620	1.88243e+06		5.03183e+07		18.0499	0.0404575	2.9841	8.09601	0	89.8611	0
661.733	I116	438591	-5026.02	73289.3	1.93893e+06		5.10067e+07		17.6873	-0.240685	3.23853	8.22645	0	89.8611	0
667.433	I117	432790	-4506.25	68531.3	1.89439e+06		5.05466e+07		17.6122	-0.217759	3.05584	8.11065	0	89.8611	0
673.167	I118	427686	-3993.52	73251.8	1.9534e+06		5.13237e+07		17.141	-0.190059	3.21688	8.23667	0	89.8611	0
678.917	I119	438314	-5005.62	70976.4	1.89868e+06		5.06368e+07		17.8052	-0.241459	3.15924	8.11454	0	89.8611	0
684.65	I120	421951	-2848.98	75888.6	1.93732e+06		5.11671e+07		16.9629	-0.136004	3.34288	8.19386	0	89.8611	0
690.417	I121	441229	2002.85	75017.7	1.91185e+06		5.08807e+07		17.8377	0.0961497	3.32311	8.13166	0	89.8611	0
696.167	I122	423497	804.453	63684.7	1.86551e+06		5.02793e+07		17.3257	0.0390808	2.85483	8.02947	0	89.8611	0
701.883	I123	426319	2990.98	70890.2	1.91985e+06		5.09336e+07		17.2171	0.143437	3.13701	8.15721	0	89.8611	0
707.6	I124	423224	-3709.96	73856.8	1.8747e+06		5.03147e+07		17.3023	-0.180105	3.30849	8.06335	0	89.8611	0
713.333	I125	409340	610.039	73834.6	1.93863e+06		5.1056e+07		16.4917	0.0291852	3.25947	8.21726	0	89.8611	0
719.05	I126	432028	-1392.7	73165.9	1.88264e+06		5.03226e+07		17.6594	-0.0675997	3.27702	8.0962	0	89.8611	0
724.75	I127	428327	-3799.26	68351.7	1.92795e+06		5.12944e+07		17.1765	-0.180918	3.0034	8.13399	0	89.8611	0
730.467	I128	430624	1471.45	72309.8	1.8848e+06		5.07986e+07		17.4371	0.070753	3.20834	8.02955	0	89.8611	0
736.183	I129	428622	2584.18	71722.5	1.92113e+06		5.15784e+07		17.0936	0.122379	3.13417	8.06058	0	89.8611	0
741.9	I130	416056	-4929.3	70509.7	1.88815e+06		5.08133e+07		16.8424	-0.236952	3.12756	8.0415	0	89.8611	0
747.617	I131	424463	-6364.77	72151.7	1.88414e+06		5.16173e+07		16.915	-0.301189	3.15054	7.89942	0	89.8611	0
753.317	I132	429387	-3784.88	78444.6	1.89851e+06		5.09388e+07		17.3392	-0.181491	3.47095	8.0657	0	89.8611	0
759.033	I133	418708	-5925.59	70790	1.86114e+06		5.04231e+07		17.0809	-0.287048	3.1643	7.98782	0	89.8611	0
764.717	I134	417472	-2189.18	68250.1	1915120		5.12365e+07		16.7601	-0.104365	3.00233	8.089	0	89.8611	0
770.45	I135	438482	-2817.42	71996.9	1.85846e+06		5.07491e+07		17.7726	-0.135605	3.19757	7.92505	0	89.8611	0
776.167	I136	410048	1040.55	72144.8	1.91494e+06		5.14645e+07		16.3891	0.0493863	3.1596	8.0524	0	89.8611	0
781.9	I137	434143	-4158.01	63784.8	1.8627e+06		5.10496e+07		17.4932	-0.19895	2.81617	7.89639	0	89.8611	0
787.65	I138	432064	-1193.83	74437.1	1.91996e+06		5.15654e+07		17.2353	-0.0565504	3.25361	8.05773	0	89.8611	0
790.35	I139	279489	2907	69691.1	1.90704e+06		5.15178e+07		11.1593	0.137829	3.04898	8.01087	0	89.8611	0

## Sheet: Hydride
time [min]:	Peak name	A/B	C	Riv 1	Riv 2	[A/b]	[C]	Sum Hyds	%			1	2
0.0166667	I0	36554.7	-7116.78	644.559	-125.488	0.00829435	-0.00161482	0.00667953	0.275502	RG Calibration				Flow Calibration
5.83333	I1	20114.7	8897.73	354.677	156.891	0.00456408	0.00201892	0.00658299	0.27152		Hyd 1	Hyd 2			Hyd1	Hyd 2	1-hexene
11.5667	I2	1.07433e+06	29808.6	18943.4	525.608	0.243768	0.00676365	0.250532	10.3334	CF	0.9894	0.9894		0 mL/min	4.56654e+06	4.56654e+06	29142933
17.2667	I3	2.99639e+06	112392	52834.6	1981.78	0.679888	0.025502	0.70539	29.0943	RG Hyd	203	203		4 mL/min	4.44376e+06	4.44376e+06	6.75363e+06
22.9833	I4	4.79463e+06	178849	84542.6	3153.59	1.08791	0.0405812	1.1285	46.5456	RG 1H	3.2	3.2		CF	1.13056	1.13056	4.31515
28.6667	I5	6.0513e+06	211903	106701	3736.43	1.37306	0.0480813	1.42114	58.6158	Int TMB	6.28485e+07	6.28485e+07
34.3833	I6	7.0046e+06	349505	123510	6162.73	1.58936	0.0793035	1.66867	68.8253	[TMB]	89.8611	89.8611
40.0667	I7	7.71741e+06	279705	136079	4931.97	1.7511	0.0634659	1.81457	74.843
45.7667	I8	8.18203e+06	272470	144272	4804.39	1.85652	0.0618241	1.91835	79.1236	IRF	64.1171	64.1171
51.45	I9	8.44964e+06	306121	148990	5397.76	1.91725	0.0694598	1.98671	81.9431
57.1333	I10	8.52061e+06	283521	150242	4999.26	1.93335	0.0643317	1.99768	82.3958
62.8167	I11	8.72765e+06	323093	153892	5697.02	1.98033	0.0733106	2.05364	84.7037
68.5167	I12	8.58994e+06	341013	151464	6012.99	1.94908	0.0773766	2.02646	83.5826
74.2333	I13	8.59578e+06	314267	151567	5541.39	1.9504	0.0713079	2.02171	83.387
79.9333	I14	8.61793e+06	354801	151958	6256.11	1.95543	0.0805052	2.03594	83.9736
85.6333	I15	8.66384e+06	393819	152767	6944.12	1.96585	0.0893586	2.05521	84.7684
91.3333	I16	8.65692e+06	290856	152645	5128.59	1.96428	0.0659959	2.03027	83.7401
97.0333	I17	8.6964e+06	332669	153342	5865.86	1.97324	0.0754834	2.04872	84.5009
102.75	I18	8.71684e+06	304316	153702	5365.93	1.97787	0.0690501	2.04692	84.4268
108.45	I19	8.67728e+06	366242	153004	6457.85	1.9689	0.0831012	2.052	84.6361
114.133	I20	8.69391e+06	289595	153298	5106.36	1.97267	0.0657099	2.03838	84.0745
119.833	I21	8.66179e+06	472665	152731	8334.38	1.96538	0.107249	2.07263	85.4872
125.55	I22	8.75998e+06	381131	154462	6720.39	1.98766	0.0864797	2.07414	85.5494
131.233	I23	8.68176e+06	404409	153083	7130.84	1.96991	0.0917615	2.06168	85.0353
136.933	I24	8.69262e+06	438293	153275	7728.31	1.97238	0.0994498	2.07183	85.454
142.617	I25	8.68053e+06	360027	153062	6348.27	1.96963	0.0816911	2.05133	84.6084
148.317	I26	8.72114e+06	209183	153778	3688.47	1.97885	0.0474641	2.02631	83.5767
154.017	I27	8.72821e+06	297012	153902	5237.14	1.98045	0.0673928	2.04785	84.4649
159.683	I28	8.72505e+06	316848	153847	5586.91	1.97974	0.0718937	2.05163	84.6209
165.4	I29	8.75747e+06	253279	154418	4466	1.98709	0.0574697	2.04456	84.3294
171.083	I30	8.81592e+06	310856	155449	5481.24	2.00036	0.0705339	2.07089	85.4153
176.783	I31	8.69809e+06	355617	153371	6270.51	1.97362	0.0806904	2.05431	84.7315
182.483	I32	8.71975e+06	315757	153753	5567.67	1.97853	0.0716461	2.05018	84.5611
188.167	I33	8.73536e+06	287171	154029	5063.62	1.98208	0.06516	2.04724	84.4397
193.867	I34	8.65175e+06	360080	152554	6349.21	1.9631	0.0817032	2.04481	84.3395
199.567	I35	8.66135e+06	407054	152723	7177.48	1.96528	0.0923615	2.05764	84.869
205.267	I36	8.72627e+06	383751	153868	6766.58	1.98001	0.0870741	2.06709	85.2584
210.983	I37	8.73081e+06	255206	153948	4499.99	1.98104	0.057907	2.03895	84.0979
216.683	I38	8.71514e+06	398187	153672	7021.13	1.97749	0.0903497	2.06784	85.2894
222.383	I39	8.68967e+06	323527	153223	5704.67	1.97171	0.0734091	2.04512	84.3523
228.1	I40	8.65498e+06	384038	152611	6771.64	1.96384	0.0871392	2.05098	84.594
233.8	I41	8.68257e+06	305439	153098	5385.73	1.9701	0.069305	2.0394	84.1166			Rh concentration
239.517	I42	8.6588e+06	343355	152678	6054.29	1.9647	0.0779081	2.04261	84.249			actual weight (g)	0.0132
245.217	I43	8.63526e+06	415474	152263	7325.94	1.95936	0.094272	2.05363	84.7036			MW RhHCO(PPh3)3 (g/mol)	918.78
250.917	I44	8.61467e+06	361346	151900	6371.53	1.95469	0.0819904	2.03668	84.0043			MW Rh(acac)(CO)2 (g/mol)	258.03
256.617	I45	8.74826e+06	320554	154256	5652.24	1.985	0.0727344	2.05774	84.8728			Number of mol (n)	5.11568e-05
262.3	I46	8.60136e+06	266475	151666	4698.68	1.95167	0.0604638	2.01214	82.992			actual volume of reaction (L)	0.0211
267.983	I47	8.73798e+06	306560	154075	5405.49	1.98267	0.0695592	2.05223	84.6457			[Rh] (M)	0.00242449
273.683	I48	8.6872e+06	262964	153179	4636.78	1.97115	0.0596673	2.03082	83.7624			[Rh] (mM)	2.42449
279.367	I49	8.7557e+06	298510	154387	5263.54	1.98669	0.0677326	2.05442	84.7361
285.067	I50	8.76854e+06	327013	154613	5766.14	1.9896	0.0742001	2.0638	85.1231
290.733	I51	8.83435e+06	226766	155774	3998.51	2.00454	0.0514538	2.05599	84.8008
296.45	I52	8.71003e+06	328738	153582	5796.55	1.97633	0.0745914	2.05092	84.5917
302.15	I53	8.72674e+06	263092	153876	4639.04	1.98012	0.0596963	2.03982	84.1336
307.85	I54	8.65771e+06	313385	152659	5525.85	1.96446	0.071108	2.03556	83.9583
313.55	I55	8.65109e+06	344172	152542	6068.69	1.96295	0.0780935	2.04105	84.1844
319.25	I56	8.73131e+06	335259	153957	5911.54	1.98116	0.0760711	2.05723	84.8518			82.8872
324.933	I57	8.65774e+06	339245	152660	5981.83	1.96446	0.0769757	2.04144	84.2006
330.617	I58	8.75053e+06	405012	154296	7141.47	1.98552	0.0918982	2.07742	85.6845
336.3	I59	8.70194e+06	369354	153439	6512.73	1.97449	0.0838074	2.0583	84.8961
342	I60	8.70706e+06	376578	153529	6640.11	1.97565	0.0854466	2.0611	85.0116
347.683	I61	8.68959e+06	265984	153221	4690.03	1.97169	0.0603524	2.03204	83.8131
353.383	I62	8.74536e+06	264999	154205	4672.67	1.98434	0.060129	2.04447	84.3257
359.083	I63	8.64485e+06	384374	152432	6777.57	1.96154	0.0872154	2.04875	84.5023
364.783	I64	8.61028e+06	353193	151823	6227.77	1.9537	0.0801405	2.03384	83.887
370.483	I65	8.70801e+06	322720	153546	5690.44	1.97587	0.073226	2.0491	84.5164
376.167	I66	8.6047e+06	371547	151725	6551.39	1.95243	0.0843049	2.03673	84.0066
381.867	I67	8.67605e+06	333023	152983	5872.12	1.96862	0.0755639	2.04418	84.3137
387.55	I68	8.54884e+06	321761	150740	5673.53	1.93975	0.0730084	2.01276	83.0178
393.25	I69	8.66945e+06	359155	152866	6332.89	1.96712	0.0814932	2.04861	84.4965
398.933	I70	8.6187e+06	368050	151971	6489.73	1.95561	0.0835114	2.03912	84.1048
404.6	I71	8.6877e+06	329755	153188	5814.48	1.97126	0.0748222	2.04608	84.3922
410.3	I72	8.59996e+06	412009	151641	7264.85	1.95135	0.0934859	2.04484	84.3408
415.983	I73	8.70423e+06	263100	153480	4639.17	1.97501	0.059698	2.03471	83.9231
421.65	I74	8.66889e+06	359360	152856	6336.51	1.96699	0.0815397	2.04853	84.4932
427.383	I75	8.55391e+06	296424	150829	5226.77	1.9409	0.0672593	2.00816	82.8281
433.1	I76	8.58145e+06	338855	151315	5974.94	1.94715	0.076887	2.02404	83.483
438.817	I77	8.59751e+06	287303	151598	5065.94	1.9508	0.0651898	2.01599	83.1508
444.517	I78	8.67777e+06	389061	153013	6860.22	1.96901	0.088279	2.05729	84.8543
450.233	I79	8.54929e+06	310657	150747	5477.74	1.93985	0.0704889	2.01034	82.918
455.933	I80	8.68708e+06	425909	153177	7509.95	1.97112	0.0966399	2.06776	85.2862
461.65	I81	8.63816e+06	342413	152314	6037.69	1.96002	0.0776945	2.03772	84.047
467.35	I82	8.66562e+06	325498	152799	5739.43	1.96625	0.0738564	2.04011	84.1457
473.067	I83	8.56185e+06	276366	150969	4873.08	1.94271	0.0627081	2.00541	82.7147
478.767	I84	8.635e+06	273166	152259	4816.67	1.9593	0.0619822	2.02129	83.3694
484.483	I85	8.59793e+06	258720	151605	4561.94	1.95089	0.0587042	2.0096	82.8872
490.183	I86	8.48194e+06	430208	149560	7585.75	1.92457	0.0976154	2.02219	83.4066
495.883	I87	8.57265e+06	335006	151159	5907.07	1.94516	0.0760137	2.02117	83.3646
501.633	I88	8.47667e+06	361425	149467	6372.91	1.92338	0.0820082	2.00539	82.7136
507.333	I89	8.59566e+06	289498	151565	5104.65	1.95038	0.0656879	2.01607	83.1541
513.067	I90	8.56252e+06	309093	150981	5450.16	1.94286	0.070134	2.01299	83.0272
518.783	I91	8.64708e+06	352139	152472	6209.18	1.96205	0.0799013	2.04195	84.2215
524.533	I92	8.55121e+06	236807	150781	4175.56	1.94029	0.0537321	1.99402	82.2449
530.25	I93	8.63076e+06	351476	152184	6197.5	1.95834	0.0797509	2.03809	84.0625
535.967	I94	8.582e+06	314654	151324	5548.21	1.94728	0.0713958	2.01867	83.2616
541.683	I95	8.70013e+06	367951	153407	6488	1.97408	0.0834891	2.05757	84.866
547.4	I96	8.58911e+06	374555	151450	6604.43	1.94889	0.0849874	2.03388	83.8888
553.1	I97	8.51238e+06	240182	150097	4235.07	1.93148	0.0544979	1.98598	81.9131
558.817	I98	8.53076e+06	236054	150421	4162.28	1.93565	0.0535612	1.98921	82.0465
564.517	I99	8.49233e+06	289191	149743	5099.23	1.92693	0.0656181	1.99255	82.1841
570.233	I100	8.55817e+06	336384	150904	5931.37	1.94187	0.0763264	2.0182	83.242
575.95	I101	8.54377e+06	433094	150650	7636.64	1.9386	0.0982702	2.03687	84.0123
581.65	I102	8.5728e+06	398502	151162	7026.69	1.94519	0.0904211	2.03561	83.9603
587.383	I103	8.53459e+06	347510	150488	6127.55	1.93652	0.0788508	2.01537	83.1255
593.1	I104	8.68538e+06	280672	153147	4949.02	1.97074	0.0636852	2.03442	83.9111
598.817	I105	8.56753e+06	319750	151069	5638.07	1.944	0.0725521	2.01655	83.1739
604.567	I106	8.60702e+06	290419	151765	5120.89	1.95295	0.0658969	2.01885	83.269
610.267	I107	8.63713e+06	356559	152296	6287.12	1.95979	0.0809042	2.04069	84.1698
616.017	I108	8.47841e+06	378608	149498	6675.9	1.92377	0.0859072	2.00968	82.8907
621.733	I109	8.51277e+06	316821	150104	5586.43	1.93157	0.0718876	2.00346	82.634
627.467	I110	8.52296e+06	308101	150283	5432.66	1.93388	0.0699088	2.00379	82.6477
633.167	I111	8.51431e+06	184909	150131	3260.46	1.93192	0.0419564	1.97388	81.4139
638.883	I112	8.47671e+06	263185	149468	4640.67	1.92339	0.0597173	1.98311	81.7946
644.6	I113	8.5366e+06	311528	150524	5493.1	1.93698	0.0706865	2.00766	82.8075
650.317	I114	8.47918e+06	230949	149511	4072.27	1.92395	0.052403	1.97635	81.516
656.033	I115	8.48263e+06	408276	149572	7199.03	1.92473	0.0926389	2.01737	83.2078
661.733	I116	8.54738e+06	285554	150714	5035.11	1.93942	0.064793	2.00422	82.6653
667.433	I117	8.51701e+06	243960	150178	4301.68	1.93253	0.0553551	1.98789	81.9918
673.167	I118	8.57914e+06	341312	151274	6018.27	1.94663	0.0774446	2.02407	83.4843
678.917	I119	8.46322e+06	375978	149230	6629.53	1.92033	0.0853104	2.00564	82.7239
684.65	I120	8.56079e+06	248476	150950	4381.32	1.94247	0.0563799	1.99884	82.4438
690.417	I121	8.54279e+06	308270	150633	5435.66	1.93838	0.0699474	2.00833	82.835
696.167	I122	8.60841e+06	353717	151790	6237.01	1.95327	0.0802594	2.03353	83.8743
701.883	I123	8.47685e+06	267521	149470	4717.13	1.92342	0.0607012	1.98412	81.8365
707.6	I124	8.50292e+06	345298	149930	6088.56	1.92934	0.0783491	2.00768	82.8084
713.333	I125	8.59549e+06	315382	151562	5561.05	1.95034	0.071561	2.0219	83.3947
719.05	I126	8.47939e+06	411343	149515	7253.11	1.92399	0.0933348	2.01733	83.2062
724.75	I127	8.59757e+06	396810	151599	6996.84	1.95081	0.0900371	2.04085	84.1762
730.483	I128	8.55218e+06	318203	150798	5610.8	1.94051	0.0722012	2.01271	83.0157
736.183	I129	8.596e+06	306002	151571	5395.66	1.95046	0.0694327	2.01989	83.3117
741.917	I130	8.48696e+06	226965	149648	4002.01	1.92571	0.0514988	1.97721	81.5515
747.633	I131	8.60837e+06	350768	151789	6185	1.95326	0.0795901	2.03285	83.8464
753.333	I132	8.51421e+06	451578	150129	7962.56	1.9319	0.102464	2.03436	83.9087
759.033	I133	8.5389e+06	320205	150564	5646.09	1.9375	0.0726553	2.01015	82.9102
764.733	I134	8.56324e+06	292113	150993	5150.76	1.94302	0.0662812	2.0093	82.8751
770.467	I135	8.5493e+06	254234	150748	4482.85	1.93986	0.0576865	1.99755	82.3902
776.183	I136	8.57383e+06	425471	151180	7502.23	1.94543	0.0965406	2.04197	84.2223
781.9	I137	8.54807e+06	311280	150726	5488.72	1.93958	0.0706302	2.01021	82.9125
787.667	I138	8.57534e+06	331665	151207	5848.16	1.94577	0.0752556	2.02102	83.3585
		1.40342e+06	176794	24746.2	3117.37	0.31844	0.040115	0.358555	14.7889
		1.38438e+06	152497	24410.5	2688.95	0.31412	0.034602	0.348722	14.3833
		1.34616e+06	167769	23736.5	2958.23	0.305448	0.0380673	0.343515	14.1685
		1.3398e+06	129778	23624.3	2288.34	0.304003	0.0294469	0.33345	13.7534
		1.31694e+06	124287	23221.2	2191.53	0.298816	0.0282011	0.327017	13.4881
		1.30503e+06	177861	23011.2	3136.18	0.296114	0.0403572	0.336471	13.878
		1.32898e+06	152366	23433.5	2686.64	0.301548	0.0345723	0.336121	13.8635
		1.35264e+06	150461	23850.7	2653.04	0.306917	0.03414	0.341057	14.0671
		1.27681e+06	140691	22513.7	2480.77	0.289712	0.0319232	0.321635	13.2661
		1.32247e+06	166901	23318.7	2942.93	0.300071	0.0378704	0.337942	13.9386
		1.28336e+06	123732	22629.1	2181.73	0.291197	0.028075	0.319272	13.1686
		1.27465e+06	101585	22475.7	1791.23	0.289223	0.02305	0.312272	12.8799
		1.27813e+06	148724	22536.9	2622.42	0.290011	0.0337459	0.323756	13.3536
		1.23521e+06	108549	21780.2	1914.01	0.280272	0.02463	0.304902	12.5759
		1.22538e+06	117859	21606.8	2078.18	0.278042	0.0267426	0.304785	12.5711
		1.24427e+06	80511.1	21939.9	1419.63	0.282328	0.0182682	0.300596	12.3983
		1.20649e+06	125762	21273.7	2217.53	0.273755	0.0285358	0.302291	12.4682
		1.23255e+06	149806	21733.3	2641.49	0.27967	0.0339913	0.313661	12.9372
		1.26287e+06	142035	22267.8	2504.47	0.286548	0.0322282	0.318776	13.1481
		1.22673e+06	171430	21630.7	3022.78	0.278349	0.0388979	0.317247	13.0851

## Sheet: Phosphorus
time [min]:	Peak name	internal standard #1	OPPh3	PPh3	A/B	C	[PPh3]	[OPPh3]	A/B	C	V	total phosphorus		when phosphorus source is PPH3
0.0166667	I0	2.08516e+07	57623.5	2.00852e+07	-84247.8	68665.6	0	0	0	0	0	0
5.73333	I1	2.10099e+07	-77663.4	2.06176e+07	68687.8	7386.41	0	0	0	0	0	0		INTERNAL REFERENCE (CF SPECTRUM)			FLOW CALIBRATION
11.4333	I2	2.10849e+07	12071.7	2.08664e+07	1.74683e+06	132730	0	0	0	0	0	0		Triphenylphosphine mass (g)	0.2647			Triphenylphosphosphate	Peak 1	Peak 2	Peak 3
17.15	I3	2.11106e+07	-64514.4	2.10657e+07	3.54284e+06	42127.8	0	0	0	0	0	0		Triphenylphosphine n (moles)	0.00100919		0 mL/min	5.70293e+07	7.98011e+07	3.48921e+06	1.26911e+07	2720052
22.85	I4	2.10756e+07	114749	2.09198e+07	4.95539e+06	270494	0	0	0	0	0	0		Reaction Volume (L)	0.0224		4 mL/min	1.74532e+07	1.0222e+07	945257	6.42578e+06	1.02344e+06
28.5333	I5	2.12166e+07	233829	2.1496e+07	5.99526e+06	244196	0	0	0	0	0	0		Triphenylphosphine concentration (M)	0.045053		CF	3.26756	7.80679	3.69128	2.3	3.32
34.25	I6	2.11201e+07	117731	2.24121e+07	6.95789e+06	329796	0	0	0	0	0	0		Triphenylphosphine concentration (mM)	45.053			internal standard			#	acyl cpmplex
39.95	I7	2.13281e+07	255924	2.22803e+07	7.37544e+06	237328	0	0	0	0	0	0
45.6333	I8	2.13546e+07	326386	2.26477e+07	7.59349e+06	319521	0	0	0	0	0	0
51.3167	I9	2.13821e+07	230535	2.10569e+07	8.08963e+06	379432	0	0	0	0	0	0		[Triphenylphosphate] ACTUAL EXPERIMENT
57	I10	2.14599e+07	209773	2.12325e+07	7.85448e+06	545430	0	0	0	0	0	0
62.7	I11	2.14592e+07	498124	2.0918e+07	8.03646e+06	428020	0	0	0	0	0	0
68.4	I12	2.12953e+07	362516	2.04442e+07	8.01669e+06	381651	0	0	0	0	0	0
74.1167	I13	2.12042e+07	302011	2.12598e+07	8.07927e+06	336789	0	0	0	0	0	0
79.8	I14	2.12512e+07	535486	2.04718e+07	8.02909e+06	366213	0	0	0	0	0	0
85.5167	I15	2.13796e+07	446315	2.06914e+07	7.9775e+06	499420	0	0	0	0	0	0
91.2167	I16	2.12759e+07	547198	2.09956e+07	8.01131e+06	404267	0	0	0	0	0	0
96.9167	I17	2.15193e+07	630175	2.07421e+07	8.22067e+06	460684	0	0	0	0	0	0
102.633	I18	2.12213e+07	433998	2.02903e+07	8.04903e+06	202356	0	0	0	0	0	0
108.317	I19	2.14184e+07	488137	2.02688e+07	8.15747e+06	317363	0	0	0	0	0	0
114.017	I20	2.1423e+07	471344	2.09591e+07	7.90146e+06	482721	0	0	0	0	0	0
119.717	I21	2.14535e+07	469261	2.07143e+07	8.18694e+06	383875	0	0	0	0	0	0
125.417	I22	2.13362e+07	730598	2.04683e+07	8.15481e+06	381770	0	0	0	0	0	0
131.117	I23	2.15621e+07	574452	2.0315e+07	8.15354e+06	347345	0	0	0	0	0	0
136.8	I24	2.13675e+07	560929	2.06427e+07	8.26257e+06	336472	0	0	0	0	0	0		actual weight (g)	0.0132
142.5	I25	2.13628e+07	612870	2.028e+07	8.20509e+06	348146	0	0	0	0	0	0		MW RhHCO(PPh3)3 (g/mol)	918.78
148.2	I26	2.14912e+07	619280	2.01091e+07	8.19414e+06	399181	0	0	0	0	0	0		MW Rh(acac)(CO)2 (g/mol)	258.03
153.883	I27	2.15184e+07	583490	2.07941e+07	8.27501e+06	320127	0	0	0	0	0	0		Number of mol (n)	5.11568e-05
159.567	I28	2.14359e+07	476257	2.02937e+07	7.973e+06	389123	0	0	0	0	0	0		actual volume of reaction (L)	0.0211
165.267	I29	2.17583e+07	634395	2.03352e+07	8.11401e+06	435005	0	0	0	0	0	0		[Rh] (M)	0.00242449
170.967	I30	2.17935e+07	770356	2.08634e+07	8.2663e+06	427908	0	0	0	0	0	0		[Rh] (mM)	2.42449		[PPh3]	7.27348
176.667	I31	2.15051e+07	690849	2.05009e+07	8.15551e+06	427691	0	0	0	0	0	0
182.333	I32	2.14483e+07	736372	2.05219e+07	8.03516e+06	443516	0	0	0	0	0	0
188.05	I33	2.15606e+07	548237	2.08611e+07	8.10695e+06	211228	0	0	0	0	0	0
193.733	I34	2.14375e+07	709477	2.06785e+07	8.0414e+06	282066	0	0	0	0	0	0
199.45	I35	2.13841e+07	509691	2.03598e+07	8.08969e+06	539709	0	0	0	0	0	0
205.15	I36	2.15479e+07	732184	2.04669e+07	8.06106e+06	462025	0	0	0	0	0	0
210.85	I37	2.1558e+07	801451	2.04369e+07	8.00336e+06	433848	0	0	0	0	0	0
216.55	I38	2.16275e+07	655587	2.04635e+07	8.04946e+06	324862	0	0	0	0	0	0
222.267	I39	2.15819e+07	787491	2.05206e+07	8.05127e+06	342966	0	0	0	0	0	0
227.967	I40	2.15239e+07	730281	2.0343e+07	8.00252e+06	375733	0	0	0	0	0	0
233.667	I41	2.14453e+07	719130	2.04549e+07	8.15867e+06	285406	0	0	0	0	0	0
239.4	I42	2.17166e+07	782409	2.09682e+07	7.99885e+06	473727	0	0	0	0	0	0
245.083	I43	2.157e+07	838056	2.03682e+07	8.01245e+06	475693	0	0	0	0	0	0
250.783	I44	2.15175e+07	747275	2.05368e+07	8.00259e+06	318981	0	0	0	0	0	0
256.483	I45	2.16196e+07	762123	2.01869e+07	8.29143e+06	468259	0	0	0	0	0	0
262.167	I46	2.17384e+07	778777	2.06398e+07	8.16145e+06	214456	0	0	0	0	0	0
267.85	I47	2.17718e+07	717979	2.05948e+07	8.33702e+06	242623	0	0	0	0	0	0
273.55	I48	2.16295e+07	699060	2.06545e+07	8.11287e+06	174568	0	0	0	0	0	0
279.233	I49	2.18112e+07	822400	2.09384e+07	8.21712e+06	406656	0	0	0	0	0	0
284.917	I50	2.16904e+07	1.05353e+06	2.02599e+07	8.18959e+06	142238	0	0	0	0	0	0											6.51792
290.617	I51	2.17626e+07	999923	2.06919e+07	8.1395e+06	421721	0	0	0	0	0	0											7.45221
296.317	I52	2.16448e+07	919630	2.02214e+07	8.1637e+06	368106	0	0	0	0	0	0											6.90797
302.017	I53	2.16317e+07	1.10275e+06	2.0598e+07	8.04313e+06	69979	0	0	0	0	0	0
307.717	I54	2.16433e+07	783385	2.02775e+07	8.09764e+06	246785	0	0	0	0	0	0
313.4	I55	2.17347e+07	872661	2.02821e+07	8.32861e+06	399318	0	0	0	0	0	0
319.1	I56	2.17094e+07	807828	2.0581e+07	8.109e+06	271922	0	0	0	0	0	0
324.783	I57	2.16928e+07	995244	2.04576e+07	8.0253e+06	271342	0	0	0	0	0	0
330.483	I58	2.18686e+07	1.03395e+06	2.09092e+07	8.22315e+06	495502	0	0	0	0	0	0										Object	Integral [abs]	Integral [rel]
336.167	I59	2.15392e+07	789209	2.08089e+07	7.86587e+06	239882	0	0	0	0	0	0										Integral 1	1.6066e+06	0.7651
341.867	I60	2.17215e+07	990015	2.10807e+07	8.19317e+06	186595	0	0	0	0	0	0										Integral 2	1.63721e+06	0.7797
347.55	I61	2.15488e+07	1.04845e+06	2.04044e+07	8.00913e+06	348892	0	0	0	0	0	0										Integral 3	2.44396e+07	11.6394
353.25	I62	2.18335e+07	1.03511e+06	2.06235e+07	8.03349e+06	299650	0	0	0	0	0	0
358.95	I63	2.14711e+07	961458	2.07668e+07	8.1929e+06	317748	0	0	0	0	0	0
364.65	I64	2.18029e+07	994060	2.06545e+07	8.03517e+06	389350	0	0	0	0	0	0										Object	Integral [abs]	Integral [rel]
370.35	I65	2.1556e+07	1.12243e+06	2.0375e+07	8.09398e+06	436852	0	0	0	0	0	0										Integral 1	1.04717e+07	0.8794
376.033	I66	2.18002e+07	935427	2.06093e+07	8.34524e+06	201411	0	0	0	0	0	0										Integral 2	1.22008e+07	1.0247
381.717	I67	2.17329e+07	935759	2.07574e+07	7.99652e+06	489265	0	0	0	0	0	0										Integral 3	1.68828e+08	14.1785
387.417	I68	2.18778e+07	1.02464e+06	2.04275e+07	8.12293e+06	475767	0	0	0	0	0	0
393.1	I69	2.17089e+07	1.01689e+06	2.03169e+07	8.18765e+06	356470	0	0	0	0	0	0
398.783	I70	2.1777e+07	1.00815e+06	2.03586e+07	8.18497e+06	310442	0	0	0	0	0	0
404.483	I71	2.16923e+07	1.01899e+06	2.03324e+07	8.2025e+06	385419	0	0	0	0	0	0
410.167	I72	2.1653e+07	924095	2.05968e+07	8.10465e+06	351049	0	0	0	0	0	0
415.833	I73	2.18486e+07	1.07609e+06	2.10362e+07	8.21033e+06	250810	0	0	0	0	0	0
421.533	I74	2.17078e+07	1.00702e+06	2.09239e+07	8.13803e+06	382720	0	0	0	0	0	0
427.267	I75	2.17571e+07	1.09169e+06	2.03812e+07	8.18728e+06	382282	0	0	0	0	0	0
432.983	I76	2.16939e+07	1.10467e+06	1.98871e+07	8.08818e+06	258923	0	0	0	0	0	0
438.683	I77	2.17933e+07	1.18297e+06	2.02341e+07	8.06152e+06	183618	0	0	0	0	0	0
444.383	I78	2.18552e+07	1.26148e+06	2.07027e+07	8.06655e+06	280302	0	0	0	0	0	0
450.1	I79	2.18375e+07	1.11944e+06	2.05533e+07	7.97163e+06	389976	0	0	0	0	0	0
455.817	I80	2.1914e+07	1.19355e+06	2.07154e+07	8.17059e+06	393926	0	0	0	0	0	0
461.517	I81	2.17823e+07	1.35239e+06	2.00722e+07	8.15194e+06	344919	0	0	0	0	0	0
467.233	I82	2.19527e+07	1.12613e+06	2.03963e+07	7.91399e+06	304156	0	0	0	0	0	0
472.933	I83	2.16546e+07	1.18437e+06	2.04896e+07	8.01098e+06	343750	0	0	0	0	0	0
478.633	I84	2.20487e+07	1.13819e+06	2.04108e+07	8.04389e+06	213264	0	0	0	0	0	0
484.35	I85	2.16511e+07	1.25786e+06	2.01794e+07	7.96203e+06	362726	0	0	0	0	0	0
490.05	I86	2.19211e+07	1.23691e+06	2.09861e+07	7.99239e+06	274144	0	0	0	0	0	0
495.8	I87	2.18822e+07	1.28519e+06	2.03768e+07	8.06607e+06	200062	0	0	0	0	0	0
501.517	I88	2.18036e+07	1.27693e+06	2.06401e+07	7.84619e+06	237415	0	0	0	0	0	0
507.217	I89	2.19167e+07	1.16423e+06	2.06695e+07	7.8191e+06	371246	0	0	0	0	0	0
512.95	I90	2.18297e+07	1.2075e+06	2.05077e+07	7.93299e+06	321057	0	0	0	0	0	0
518.667	I91	2.19508e+07	1.1425e+06	2.03395e+07	8.03573e+06	603988	0	0	0	0	0	0
524.417	I92	2.17288e+07	1.24751e+06	1.99879e+07	7.86529e+06	560257	0	0	0	0	0	0
530.133	I93	2.1937e+07	1.20189e+06	2.1002e+07	8.17885e+06	410553	0	0	0	0	0	0
535.85	I94	2.17713e+07	1.04967e+06	2.0162e+07	8.04435e+06	449835	0	0	0	0	0	0
541.567	I95	2.2207e+07	1.20947e+06	2.07651e+07	7.99259e+06	358808	0	0	0	0	0	0
547.283	I96	2.17215e+07	1.37112e+06	2.06866e+07	7.80057e+06	331896	0	0	0	0	0	0
553	I97	2.19357e+07	1.25948e+06	2.05058e+07	8.11331e+06	367172	0	0	0	0	0	0
558.683	I98	2.17392e+07	1.11302e+06	2.0243e+07	7.97532e+06	448893	0	0	0	0	0	0
564.4	I99	2.18405e+07	1.19374e+06	2.03953e+07	8.0163e+06	395031	0	0	0	0	0	0
570.117	I100	2.18147e+07	1.30298e+06	2.01919e+07	8.02403e+06	329783	0	0	0	0	0	0
575.833	I101	2.17808e+07	1.33216e+06	2.01249e+07	8.06299e+06	370919	0	0	0	0	0	0
581.533	I102	2.19151e+07	1.35475e+06	2.02657e+07	8.12303e+06	247555	0	0	0	0	0	0
587.267	I103	2.18616e+07	1.27944e+06	2.0363e+07	8.04631e+06	429771	0	0	0	0	0	0
593	I104	2.19955e+07	1.30678e+06	2.06854e+07	8.10228e+06	186842	0	0	0	0	0	0
598.7	I105	2.18923e+07	1.32621e+06	2.03583e+07	7.91984e+06	152265	0	0	0	0	0	0
604.45	I106	2.2049e+07	1.36001e+06	2.07766e+07	8.0341e+06	293618	0	0	0	0	0	0
610.167	I107	2.18873e+07	1.26098e+06	2.02929e+07	7.91376e+06	191849	0	0	0	0	0	0
615.9	I108	2.19287e+07	1.37933e+06	2.0876e+07	8.01012e+06	338935	0	0	0	0	0	0
621.633	I109	2.17908e+07	1.31278e+06	2.07205e+07	7.96189e+06	252935	0	0	0	0	0	0
627.333	I110	2.18428e+07	1.33428e+06	2.08676e+07	7.88803e+06	441383	0	0	0	0	0	0
633.033	I111	2.18279e+07	1.39362e+06	2.04428e+07	8.08449e+06	271979	0	0	0	0	0	0
638.75	I112	2.16944e+07	1.24752e+06	2.00452e+07	7.93836e+06	261093	0	0	0	0	0	0
644.467	I113	2.1755e+07	1.21972e+06	2.07285e+07	7.93839e+06	376016	0	0	0	0	0	0
650.183	I114	2.17634e+07	1.43115e+06	2.08004e+07	7.90859e+06	319042	0	0	0	0	0	0
655.9	I115	2.17485e+07	1.45429e+06	2.09793e+07	7.83006e+06	381558	0	0	0	0	0	0
661.6	I116	2.19129e+07	1.40253e+06	2.08948e+07	7.99055e+06	255795	0	0	0	0	0	0
667.3	I117	2.18714e+07	1.50846e+06	2.04582e+07	7.90051e+06	360720	0	0	0	0	0	0
673.067	I118	2.19511e+07	1.4376e+06	2.0477e+07	7.98696e+06	315329	0	0	0	0	0	0
678.8	I119	2.16695e+07	1.42413e+06	2.04692e+07	7.99906e+06	380943	0	0	0	0	0	0
684.55	I120	2.19476e+07	1.51403e+06	2.01898e+07	7.84238e+06	327013	0	0	0	0	0	0
690.317	I121	2.1767e+07	1.57317e+06	2.04859e+07	7.75513e+06	446734	0	0	0	0	0	0
696.033	I122	2.19538e+07	1.39283e+06	2.0847e+07	7.7651e+06	215621	0	0	0	0	0	0
701.767	I123	2.17502e+07	1.5125e+06	2.06123e+07	7.99089e+06	399384	0	0	0	0	0	0
707.483	I124	2.18538e+07	1.45285e+06	2.05217e+07	8.15857e+06	353006	0	0	0	0	0	0
713.217	I125	2.18412e+07	1.43874e+06	2.06319e+07	7.83752e+06	281271	0	0	0	0	0	0
718.917	I126	2.20707e+07	1.55219e+06	2.03954e+07	8.03849e+06	396879	0	0	0	0	0	0
724.633	I127	2.19481e+07	1.45216e+06	2.08122e+07	8.03707e+06	486599	0	0	0	0	0	0
730.35	I128	2.21271e+07	1.47712e+06	2.09112e+07	7.91037e+06	58757.3	0	0	0	0	0	0
736.067	I129	2.19587e+07	1.48779e+06	2.06918e+07	8.00915e+06	329640	0	0	0	0	0	0
741.783	I130	2.17601e+07	1.72155e+06	2.07126e+07	7.95551e+06	499312	0	0	0	0	0	0
747.5	I131	2.19392e+07	1.47163e+06	2.08133e+07	8.03571e+06	322781	0	0	0	0	0	0
753.2	I132	2.17686e+07	1.41399e+06	2.09046e+07	7.82671e+06	496620	0	0	0	0	0	0
758.9	I133	2.20228e+07	1.57373e+06	2.07564e+07	8.0291e+06	255583	0	0	0	0	0	0
764.617	I134	2.18295e+07	1.61974e+06	2.07727e+07	7.87698e+06	341875	0	0	0	0	0	0
770.35	I135	2.2268e+07	1.59447e+06	2.1105e+07	7.9956e+06	193560	0	0	0	0	0	0
776.067	I136	2.2026e+07	1.5274e+06	2.03276e+07	7.92332e+06	330881	0	0	0	0	0	0
781.8	I137	2.20921e+07	1.57433e+06	2.08801e+07	8.15224e+06	395030	0	0	0	0	0	0
784.983	I138	2.31475e+07	1.79439e+06	2.36931e+07	8.32656e+06	97553.1	0	0	0	0	0	0
