# Supplementary material for: Mapping catalyst activation, turnover speciation and deactivation in Rh/PPh3-catalysed olefin hydroformylation
Source: Royal Society of Chemistry journal article supplement (doi:10.1039/d2cy00312k), 2022-01-01
Supplement: d2cy00312k4.xlsx [file d2cy00312k4.xlsx]

## Sheet: Proton
time [min]:	Peak name	hydrogen bond #1	acac coordinated #1	acac decoordinatedl #1	Hydrogen #2	TMB aromatic #3	TMB methyl #9	1-hexene (other H double bond)	[1-hexene]	[1-heptanal]	[2-methylhexanal]	[Hydrogen]	[TMB aromatic]	[TMB methyl]	[1-hexene (other H double bond)]					total
0.0166667	I0	540721	202686	23793.2	-16184.5		9.37069e+07		11.594	5.1607	0.559011	-0.0365098	0	87.7759	0					5.1607	INTERNAL REFERENCE			FLOW CALIBRATION
5.86667	I1	407127	203876	31987.9	-37.125		93463490		8.75226	5.2045	0.753497	-8.39665e-05	0	87.7759	0						1-hexene Volume (mL)	1.3			1-hexene (initial)	1-hexene (end)	1-heptanal (end)	2-methylhexanal (end)	Hydrogen (end)	TMB aromatic (initial)	TMB methyl (initial)	TMB aromatic (end)	TMB methyl (end)	1-hexene (other H double bond)
11.6	I2	426508	201053	28266.5	4.65111e+06		9.25571e+07		9.25869	5.18271	0.672357	10.6225	0	87.7759	0						1-hexene n (moles)	0.0104729		0 mL/min	29142933	4176547	20157390	6.62235e+06	1074285	2.00388e+07	62136918	20500117	6.30756e+07	6.17893e+06
17.3333	I3	392931	198352	2517.38	7.37131e+06		9.30503e+07		8.48458	5.08597	0.0595618	16.7459	0	87.7759	0						Reaction Volume (L)	0.0224		4 mL/min	6.75363e+06	987741	4.8867e+06	1.7202e+06	1.58738e+06	7.57361e+06	3.6012e+07	8.49335e+06	3.78577e+07	1.62179e+06
23.0667	I4	376181	188708	18934.6	7.76474e+06		9.41438e+07		8.02855	4.7825	0.442795	17.4348	0	87.7759	0						1-hexene (M)	0.467541		CF	4.31515	4.22838	4.12495	3.84975	0.676765	2.64587	1.72545	2.41367	1.66612	3.80995
28.7833	I5	424414	198513	20933.8	7.6262e+06		9.45015e+07		9.02367	5.01195	0.487693	17.0589	0	87.7759	0						1-hexene(mM)	467.541
34.5333	I6	418056	198554	26191.6	7.63004e+06		9.52741e+07		8.8164	4.97233	0.605237	16.9291	0	87.7759	0
40.2833	I7	408334	199141	26751.8	7.62824e+06		9.59911e+07		8.54705	4.94978	0.613563	16.7987	0	87.7759	0						# is the number of protons of the peak taken for integration			0 mL	static with long delay (flow+ full relaxtion effects)
46	I8	404102	199840	23444.2	7.61175e+06		96241243		8.43648	4.95425	0.536307	16.7188	0	87.7759	0						If #>1 the integration will be divided by the number of protons			4 mL	flow with shot delay (flow + poor relaxiation)
51.7667	I9	422056	188483	37947.2	7.62087e+06		9.67632e+07		8.76378	4.64748	0.863392	16.6485	0	87.7759	0
57.5167	I10	410914	195284	24687	7.53871e+06		97586996		8.46039	4.77454	0.556948	16.33	0	87.7759	0										initial CF were calculated under Argon ( the reactor was still no pressurized)
63.3	I11	421544	193420	26581.5	7.67735e+06		9.79157e+07		8.65013	4.71307	0.597675	16.5745	0	87.7759	0						INTERNAL REFERENCE STANDARD				final CF were calculated under 10 bar H2/CO ( reactor pressurized)
69.05	I12	420292	201024	35592.5	7.69064e+06		9.7995e+07		8.61745	4.89441	0.799636	16.5898	0	87.7759	0						Mass of TMB (g)	0.3115
74.8167	I13	408213	178641	24653.5	7.72153e+06		9.92497e+07		8.26399	4.29444	0.546874	16.4458	0	87.7759	0						Molecular weight of TMB (g/mol)	168.19
80.5667	I14	414292	184991	31176.8	7.70413e+06		1.00079e+08		8.31751	4.41023	0.685841	16.2727	0	87.7759	0						Moles of TMB (n)	0.00185207
86.3167	I15	393758	185531	32183	7.74263e+06		9.94498e+07		7.95532	4.45111	0.71246	16.4576	0	87.7759	0						Reaction Volume (L)	0.0211
92.05	I16	404255	206728	28208.2	7.69236e+06		9.98037e+07		8.13843	4.94205	0.622254	16.2928	0	87.7759	0						TMB (M)	0.0877759
97.8	I17	403654	188818	34887.8	7.68693e+06		1.00281e+08		8.08763	4.49241	0.765932	16.2037	0	87.7759	0						TMB (mM)	87.7759		FLOW CALIBRATION
103.567	I18	434385	194844	35687	7662566		9.92273e+07		8.79581	4.68503	0.791803	16.3239	0	87.7759	0										1-hexene (initial)	1-hexene (end)	1-heptanal (end)	2-methylhexanal (end)	Hydrogen (end)	TMB aromatic (initial)	TMB methyl (initial)	TMB aromatic (end)	TMB methyl (end)	1-hexene (other H double bond)
109.317	I19	381965	189254	41809.5	7.63691e+06		9.96042e+07		7.7051	4.53338	0.924135	16.2077	0	87.7759	0									0 mL/min	2.78016e+07	7.53593e+06	1.87317e+07	5722346	4.41821e+06	2.16925e+07	6.43757e+07	2.16584e+07	6.12478e+07	1.44223e+07
115.05	I20	397134	179033	37652.5	7602129		99883568		7.98868	4.27657	0.829923	16.0888	0	87.7759	0									4 mL/min	6.11977e+06	1757276	3.67838e+06	1.21779e+06	3.89945e+06	7.34342e+06	3.6664e+07	7.98182e+06	3.63252e+07	3.68713e+06
120.8	I21	421267	173854	33111.2	7.62859e+06		99505878		8.5063	4.1686	0.732597	16.206	0	87.7759	0									CF	4.54292	4.28842	5.09238	4.69897	1.13304	2.954	1.75583	2.71347	1.6861	3.91153
126.55	I22	407405	177699	49711.8	7.58961e+06		1.00253e+08		8.16509	4.22905	1.09169	16.0031	0	87.7759	0
132.283	I23	383562	154126	33458.2	7.61637e+06		1.00709e+08		7.65245	3.65145	0.731432	15.9868	0	87.7759	0
138.017	I24	423100	166910	53373	7.55735e+06		1.01026e+08		8.41473	3.94188	1.16312	15.8131	0	87.7759	0
143.783	I25	410808	153025	47230.2	7.4968e+06		100513646		8.21195	3.6324	1.03451	15.7664	0	87.7759	0
149.517	I26	425277	187839	47120.5	7457967		1.00938e+08		8.46542	4.44004	1.02776	15.6188	0	87.7759	0
155.283	I27	395301	171940	52695	7.29322e+06		1.01409e+08		7.8322	4.04536	1.14401	15.2028	0	87.7759	0
161.017	I28	384790	174197	61233.8	7.42048e+06		101477589		7.61878	4.09567	1.32849	15.4577	0	87.7759	0
166.75	I29	404148	158249	41411.5	7.39192e+06		1.01668e+08		7.98704	3.71374	0.896753	15.3693	0	87.7759	0
172.483	I30	403570	150650	57015.2	7.31723e+06		1.01709e+08		7.97246	3.53401	1.23416	15.2079	0	87.7759	0
178.2	I31	401087	151066	63467.8	7.29874e+06		1.01727e+08		7.92195	3.54312	1.37358	15.1667	0	87.7759	0
183.967	I32	412854	151950	58986.5	7.25922e+06		1.01818e+08		8.14712	3.56068	1.27546	15.0712	0	87.7759	0
189.7	I33	403432	157569	57534.8	7.25775e+06		101779998		7.96417	3.69372	1.24453	15.0737	0	87.7759	0
195.433	I34	400972	137938	70906.5	7.26412e+06		1.01842e+08		7.91081	3.23157	1.53285	15.0779	0	87.7759	0
201.167	I35	417783	166771	55456.2	7.25829e+06		101776042		8.24778	3.90958	1.19962	15.0754	0	87.7759	0
206.917	I36	403706	170249	63242	7189565		1.01643e+08		7.98033	3.99635	1.36983	14.9523	0	87.7759	0
212.65	I37	411556	138189	75230	7.19695e+06		1.01359e+08		8.15826	3.25286	1.63405	15.0095	0	87.7759	0
218.383	I38	408585	175140	66157.8	7.17857e+06		101768979		8.06676	4.10606	1.43121	14.9109	0	87.7759	0
224.117	I39	423318	152164	70247	7193847		1.01912e+08		8.34591	3.56241	1.51754	14.9217	0	87.7759	0
229.833	I40	428854	147982	65699.2	7.13424e+06		101819514		8.46273	3.46765	1.42059	14.8115	0	87.7759	0
235.583	I41	411052	116641	83681	7.10164e+06		1.01497e+08		8.13723	2.74192	1.81515	14.7907	0	87.7759	0
241.333	I42	404930	136817	91334.2	7.04994e+06		101627457		8.00573	3.21207	1.97861	14.6641	0	87.7759	0
247.1	I43	423410	137450	72599.8	7.09878e+06		1.02244e+08		8.32062	3.20749	1.56328	14.6767	0	87.7759	0
252.817	I44	427278	131057	73692	6988854		102419305		8.38226	3.05306	1.58408	14.4247	0	87.7759	0
258.567	I45	430365	136893	58754	6.98836e+06		102243522		8.45732	3.19449	1.26514	14.4484	0	87.7759	0
264.317	I46	407464	141282	80116.8	6.94286e+06		1.02221e+08		8.00907	3.29764	1.72553	14.3576	0	87.7759	0
270.083	I47	413848	148414	103628	7010234		1.02292e+08		8.12893	3.46172	2.23036	14.4869	0	87.7759	0
275.8	I48	412164	125533	70708.2	6979085		102385427		8.08843	2.92534	1.52044	14.4093	0	87.7759	0
281.517	I49	426430	113533	87270.8	6.88546e+06		1.02131e+08		8.3892	2.65228	1.88126	14.2513	0	87.7759	0
287.267	I50	418359	113942	86881.5	6.9145e+06		1.01898e+08		8.24929	2.66795	1.87716	14.3443	0	87.7759	0
293.017	I51	420254	110022	100184	6.86144e+06		1.02185e+08		8.26339	2.56893	2.15849	14.1942	0	87.7759	0
298.767	I52	419230	118496	93288	6.87126e+06		1.02388e+08		8.22685	2.76126	2.00592	14.1863	0	87.7759	0
304.517	I53	437380	106531	93202	6815295		1.01999e+08		8.61579	2.49193	2.01172	14.1244	0	87.7759	0
310.25	I54	427198	126477	98320.2	6.78067e+06		1.01796e+08		8.43199	2.96439	2.12642	14.0807	0	87.7759	0
316	I55	419794	90794	102090	6.76502e+06		102146173		8.25746	2.12076	2.20038	14	0	87.7759	0
321.75	I56	439866	97002.8	102887	6.72208e+06		1.02514e+08		8.62119	2.25764	2.2096	13.8612	0	87.7759	0
327.5	I57	455858	99982	100492	6708035		1.0244e+08		8.9411	2.32866	2.15973	13.8422	0	87.7759	0
333.233	I58	431471	113297	113300	6.68393e+06		102146143		8.48715	2.64638	2.44201	13.8322	0	87.7759	0
338.983	I59	430606	106204	128636	6587661		1.01927e+08		8.48831	2.48602	2.7785	13.6622	0	87.7759	0
344.717	I60	435258	95696	100022	6451729		1.02234e+08		8.55428	2.23333	2.15396	13.3402	0	87.7759	0
350.467	I61	437592	90088	112168	6.49639e+06		102567810		8.57217	2.09561	2.40765	13.3888	0	87.7759	0
356.217	I62	452438	84336.5	124290	6.42921e+06		102546329		8.86485	1.96224	2.66841	13.2531	0	87.7759	0
361.95	I63	460641	98697.8	114215	6.31814e+06		102449094		9.03413	2.29855	2.45445	13.0366	0	87.7759	0
367.683	I64	448984	74312.2	115028	6.24525e+06		1.02472e+08		8.80358	1.73026	2.47136	12.8833	0	87.7759	0
373.4	I65	464640	93437	114536	6278240		1.02658e+08		9.09404	2.17162	2.45634	12.9279	0	87.7759	0
379.133	I66	455094	73760.5	137085	6.27673e+06		1.02737e+08		8.90031	1.71297	2.93764	12.9148	0	87.7759	0
384.867	I67	448581	91508	123510	6244517		1.024e+08		8.80186	2.13214	2.65546	12.8909	0	87.7759	0
390.617	I68	469020	65255.8	108408	6.19013e+06		1.02054e+08		9.2341	1.52562	2.33869	12.8219	0	87.7759	0
396.35	I69	463556	62940.5	132311	6.13987e+06		1.02031e+08		9.12859	1.47182	2.85497	12.7207	0	87.7759	0
402.067	I70	472314	81711.2	111870	6.14745e+06		102301828		9.2764	1.9057	2.40751	12.7026	0	87.7759	0
407.783	I71	449693	58562.5	115222	6139686		1.02574e+08		8.80865	1.36219	2.47306	12.6529	0	87.7759	0
413.483	I72	456965	59829.2	132279	6147521		1.02631e+08		8.94613	1.39088	2.83759	12.662	0	87.7759	0
419.217	I73	472902	77612.8	125311	6.16874e+06		102529839		9.26729	1.80609	2.69077	12.7183	0	87.7759	0
424.95	I74	468958	50963	137559	6.10274e+06		1.02605e+08		9.18329	1.18507	2.95162	12.573	0	87.7759	0
430.7	I75	472808	30563.2	128834	6.08948e+06		1.02682e+08		9.2517	0.710165	2.76231	12.5362	0	87.7759	0
436.417	I76	461992	50987.8	143733	5878789		1.02506e+08		9.05558	1.18678	3.08706	12.1233	0	87.7759	0
442.167	I77	494201	50868.5	152046	5.78748e+06		1.02681e+08		9.67043	1.18199	3.26005	11.9147	0	87.7759	0
447.883	I78	481336	47500	147384	5.52443e+06		102632912		9.4231	1.10424	3.16155	11.3784	0	87.7759	0
453.6	I79	488685	58079	142850	5.44292e+06		1.02511e+08		9.57831	1.35177	3.06793	11.2238	0	87.7759	0
459.333	I80	479089	40834.2	132040	5.50994e+06		102294648		9.41013	0.952417	2.84177	11.3861	0	87.7759	0
465.083	I81	498209	49297	164776	5.50731e+06		1.02178e+08		9.79681	1.15111	3.55038	11.3936	0	87.7759	0
470.833	I82	490628	42853.5	140164	5.35377e+06		1.02313e+08		9.63507	0.999338	3.01608	11.0615	0	87.7759	0
476.583	I83	500525	43686.2	165054	5344300		1.02681e+08		9.79416	1.0151	3.53894	11.0023	0	87.7759	0
482.333	I84	494013	17934.2	142506	5438102		1.02747e+08		9.66052	0.416456	3.05354	11.1882	0	87.7759	0
488.067	I85	495158	36669.5	149565	5365763		1.02756e+08		9.68213	0.851443	3.20451	11.0385	0	87.7759	0
493.867	I86	498240	27726.8	158397	5.31805e+06		102712092		9.74652	0.64407	3.39518	10.9449	0	87.7759	0
499.633	I87	516784	28555	155507	5.21312e+06		1.0276e+08		10.1045	0.662998	3.33168	10.7239	0	87.7759	0
505.383	I88	502995	38849	134318	5.13551e+06		1.02595e+08		9.85077	0.903462	2.88236	10.5813	0	87.7759	0
511.117	I89	520306	47958.5	157662	5010263		102870494		10.1625	1.11232	3.37423	10.2956	0	87.7759	0
516.9	I90	502768	13433.2	148227	4.91554e+06		1.02905e+08		9.81662	0.311458	3.17123	10.0975	0	87.7759	0
522.633	I91	492296	19043.2	155936	4.96419e+06		102756387		9.62609	0.442169	3.34099	10.2122	0	87.7759	0
528.367	I92	498493	20295	156020	4.91963e+06		1.02515e+08		9.77016	0.472341	3.35066	10.1444	0	87.7759	0
534.117	I93	501926	15612.5	157199	4.91816e+06		102317148		9.85652	0.364066	3.38252	10.161	0	87.7759	0
539.833	I94	495356	10395	163374	4.86565e+06		1.02297e+08		9.72938	0.242446	3.51607	10.0544	0	87.7759	0
545.6	I95	504436	8647	160070	4841151		1.02415e+08		9.89636	0.201446	3.441	9.99235	0	87.7759	0
551.317	I96	519584	4123.25	169210	4.79707e+06		102385639		10.1964	0.0960851	3.63852	9.90418	0	87.7759	0
557.05	I97	491256	23395.2	170814	4.73198e+06		1.02367e+08		9.6423	0.545286	3.67368	9.7716	0	87.7759	0
562.767	I98	496264	14254	142626	4.59224e+06		1.02397e+08		9.73771	0.332128	3.06656	9.48023	0	87.7759	0
568.517	I99	505710	23788	157578	4.59814e+06		1.02298e+08		9.93263	0.55481	3.39128	9.50157	0	87.7759	0
574.233	I100	505534	23215.2	148538	4.60772e+06		1.02368e+08		9.92243	0.541084	3.19456	9.51489	0	87.7759	0
579.967	I101	506393	15531.2	165676	4.56318e+06		1.02561e+08		9.92062	0.361311	3.55644	9.4052	0	87.7759	0
585.683	I102	525379	8078.5	139536	4.59095e+06		1.02818e+08		10.2668	0.187463	2.98781	9.43871	0	87.7759	0
591.4	I103	498952	-21494.2	167539	4.58645e+06		102731006		9.75863	-0.499202	3.59048	9.4375	0	87.7759	0
597.133	I104	503485	29941.2	169129	4.59071e+06		102785153		9.84211	0.695016	3.62264	9.44129	0	87.7759	0
602.833	I105	508328	35068.2	164083	4.53483e+06		1.02672e+08		9.94772	0.814924	3.51843	9.33663	0	87.7759	0
608.55	I106	485560	82.25	174808	4.45239e+06		102673324		9.50206	0.00191132	3.74836	9.1668	0	87.7759	0
614.283	I107	493929	-4061.75	167142	4483603		102565442		9.67599	-0.0944861	3.58776	9.24076	0	87.7759	0
620.017	I108	510574	35162.2	168045	4.43728e+06		1.02846e+08		9.97484	0.815731	3.59731	9.12038	0	87.7759	0
625.717	I109	490462	-6049.75	170717	4.46199e+06		102782127		9.58781	-0.140435	3.65677	9.17683	0	87.7759	0
631.467	I110	513772	-5023.5	169152	4.44219e+06		102837286		10.0381	-0.11655	3.62129	9.13121	0	87.7759	0
637.167	I111	512590	12132.5	143848	4.43885e+06		1.02653e+08		10.0329	0.281989	3.08508	9.14068	0	87.7759	0
642.9	I112	522546	34450.5	179541	4.41734e+06		1.02669e+08		10.2263	0.800593	3.85001	9.09502	0	87.7759	0
648.633	I113	502914	-8359	175523	4.41836e+06		1.02672e+08		9.84176	-0.194248	3.76374	9.09684	0	87.7759	0
654.367	I114	517994	-6836.25	165587	4408324		102646404		10.1394	-0.158902	3.55158	9.07845	0	87.7759	0
660.083	I115	512210	20820	161867	4408118		1.02715e+08		10.0195	0.483618	3.46947	9.07196	0	87.7759	0
665.8	I116	505513	20522.5	166426	4.42957e+06		1.02627e+08		9.89695	0.477114	3.57022	9.12389	0	87.7759	0
671.483	I117	495477	12336.2	172514	4.42607e+06		1.02235e+08		9.73767	0.287898	3.71504	9.15165	0	87.7759	0
677.183	I118	510760	30859.8	165195	4412325		102508334		10.0113	0.718272	3.54794	9.09892	0	87.7759	0
682.917	I119	522447	13317.5	177481	4.43478e+06		102626942		10.2285	0.309611	3.80739	9.13466	0	87.7759	0
688.633	I120	520526	1816	158301	4.43028e+06		102676884		10.186	0.0421987	3.39429	9.12096	0	87.7759	0
694.35	I121	498501	11651	171272	4.41346e+06		1.02636e+08		9.75889	0.270845	3.6739	9.08998	0	87.7759	0
700.083	I122	493690	8618	168232	4.35979e+06		1.02494e+08		9.67802	0.200614	3.61365	8.99181	0	87.7759	0
705.817	I123	508268	7225.25	163350	4324147		1.02594e+08		9.95408	0.168029	3.50537	8.90962	0	87.7759	0
711.567	I124	505356	-16598	158331	4.34696e+06		1.0282e+08		9.87537	-0.385155	3.39022	8.937	0	87.7759	0
717.283	I125	532756	26882.2	149269	4.29628e+06		1.02952e+08		10.3974	0.622996	3.19207	8.82143	0	87.7759	0
722.983	I126	533385	17789.8	174689	4.30335e+06		102921769		10.4128	0.4124	3.73678	8.83856	0	87.7759	0
728.717	I127	505497	13216	159695	4.32611e+06		1.02697e+08		9.88994	0.307043	3.42352	8.90476	0	87.7759	0
734.433	I128	498210	19081.8	163099	4.31627e+06		1.02606e+08		9.75604	0.443714	3.4996	8.89242	0	87.7759	0
740.15	I129	494492	-17609	164005	4.29946e+06		102436639		9.6992	-0.410143	3.52484	8.87238	0	87.7759	0
745.883	I130	493811	11482.2	163064	4.25739e+06		102761307		9.65524	0.266596	3.49355	8.75781	0	87.7759	0
751.617	I131	525506	31435	159076	4249309		1.02738e+08		10.2773	0.730025	3.40887	8.74316	0	87.7759	0
757.35	I132	519276	14278.8	143492	4.2196e+06		1.02728e+08		10.1565	0.331633	3.07523	8.6829	0	87.7759	0
763.067	I133	513838	34188.8	168855	4.15326e+06		1.02728e+08		10.0501	0.794054	3.61879	8.54637	0	87.7759	0
768.783	I134	493151	29567	159857	4.14769e+06		103031910		9.61702	0.684685	3.41584	8.50973	0	87.7759	0
774.5	I135	490208	4657.5	172794	4.09962e+06		1.03106e+08		9.55272	0.107776	3.68961	8.40506	0	87.7759	0
780.2	I136	500191	14485.8	160328	4.06264e+06		103078916		9.74985	0.335295	3.42436	8.33144	0	87.7759	0
785.917	I137	525160	24400	165832	3996487		1.03174e+08		10.2271	0.564253	3.53863	8.18821	0	87.7759	0
791.667	I138	509446	12777.2	176821	3.99816e+06		1.02999e+08		9.93795	0.295978	3.77953	8.20556	0	87.7759	0
797.383	I139	509122	4331.5	146980	3.96391e+06		1.02925e+08		9.9388	0.100409	3.14397	8.14114	0	87.7759	0
803.083	I140	506704	433.25	155996	3932685		1.03071e+08		9.87757	0.010029	3.33208	8.06556	0	87.7759	0
808.817	I141	538340	21368.5	170785	3.91808e+06		103190770		10.4821	0.49407	3.64374	8.02628	0	87.7759	0
814.55	I142	538880	5272.5	167840	3.90241e+06		1.03067e+08		10.5052	0.122054	3.58521	8.00378	0	87.7759	0
820.267	I143	502764	14763.8	164778	3.87017e+06		1.02989e+08		9.80857	0.342028	3.52246	7.94365	0	87.7759	0
826	I144	503067	5790.75	179000	3.83055e+06		102823358		9.83029	0.134369	3.83266	7.875	0	87.7759	0
831.75	I145	521240	18192.8	160548	3.86769e+06		102888466		10.1789	0.421878	3.4354	7.94634	0	87.7759	0
837.45	I146	520170	22709	154359	3.87591e+06		1.0302e+08		10.1451	0.525933	3.29873	7.95303	0	87.7759	0
843.183	I147	516811	22842.5	168181	3.83477e+06		1.03244e+08		10.0577	0.527877	3.58632	7.85153	0	87.7759	0
848.9	I148	541830	9944.75	175628	3.83149e+06		103192858		10.5498	0.229932	3.747	7.84873	0	87.7759	0
854.633	I149	515568	2597.25	176751	3.8792e+06		1.03375e+08		10.0208	0.0599452	3.7643	7.93248	0	87.7759	0
860.367	I150	520085	18209.8	155950	3861704		1.03343e+08		10.1118	0.420416	3.32233	7.89916	0	87.7759	0
866.083	I151	502442	14573.2	165650	3.8573e+06		103556332		9.74859	0.335765	3.52169	7.87387	0	87.7759	0
871.817	I152	511671	13325.5	185997	3819903		1.03641e+08		9.91954	0.306766	3.95104	7.79117	0	87.7759	0
877.517	I153	521964	9496.25	154117	3762218		1.03648e+08		10.1184	0.218597	3.27361	7.67296	0	87.7759	0
883.25	I154	500702	10658	165468	3764482		1.03419e+08		9.72773	0.245885	3.52251	7.69462	0	87.7759	0
888.967	I155	500818	2362	173111	3.73344e+06		1.03403e+08		9.73144	0.0545006	3.68578	7.63232	0	87.7759	0
894.667	I156	503798	2311.5	165509	3719580		103397382		9.78992	0.0533384	3.52412	7.60442	0	87.7759	0
900.4	I157	506264	-11503.2	188194	3.71919e+06		103668192		9.81214	-0.264747	3.99668	7.58376	0	87.7759	0
906.15	I158	510341	9034.75	184304	3689318		1.03946e+08		9.86477	0.20738	3.90361	7.50278	0	87.7759	0
911.883	I159	527475	49061.8	172268	3.68254e+06		1.04062e+08		10.1846	1.12488	3.64461	7.48062	0	87.7759	0
917.583	I160	491949	27388.8	167196	3.69717e+06		104125572		9.49281	0.627582	3.53514	7.50574	0	87.7759	0
923.3	I161	518045	41534	168484	3.65336e+06		104113950		9.99749	0.95181	3.56276	7.41763	0	87.7759	0
929.05	I162	526230	19294	168506	3652930		1.04003e+08		10.1663	0.44262	3.56704	7.42466	0	87.7759	0
934.783	I163	503152	19566.8	162396	3651207		104254407		9.69698	0.447796	3.42941	7.40327	0	87.7759	0
940.533	I164	519560	-4481.25	165387	3671504		1.04196e+08		10.0188	-0.102613	3.49452	7.44861	0	87.7759	0
946.283	I165	511715	11737.5	154964	3.58664e+06		1.04204e+08		9.86683	0.26875	3.27405	7.27591	0	87.7759	0
952.017	I166	499030	15068.8	171854	3.43212e+06		1.03939e+08		9.64673	0.345903	3.64015	6.98018	0	87.7759	0
957.75	I167	512222	-15896.2	168951	3336254		1.03591e+08		9.93498	-0.366123	3.59068	6.80797	0	87.7759	0
963.45	I168	485162	5878.75	167391	3.19216e+06		1.03384e+08		9.42895	0.135671	3.56463	6.52697	0	87.7759	0
969.167	I169	483124	32941.5	167873	3058429		1.03346e+08		9.39279	0.760507	3.57621	6.25582	0	87.7759	0
974.883	I170	513208	17247.5	161198	3.02966e+06		1.03542e+08		9.95885	0.397434	3.42752	6.18527	0	87.7759	0
980.6	I171	507102	20284.8	179419	3.01675e+06		103617932		9.83314	0.467079	3.81217	6.15441	0	87.7759	0
986.35	I172	535353	-10551.5	163756	3025677		103793887		10.3634	-0.242548	3.47347	6.16215	0	87.7759	0
992.067	I173	516643	5289.75	171620	3.01879e+06		1.03886e+08		9.99226	0.121488	3.63703	6.14266	0	87.7759	0
997.783	I174	511850	21756.8	146702	3.01769e+06		1.03936e+08		9.89483	0.499439	3.10747	6.13747	0	87.7759	0
1003.55	I175	534082	25568.2	163385	2.99839e+06		103978723		10.3204	0.586695	3.45943	6.09572	0	87.7759	0
1009.27	I176	496182	11523.5	154573	2.99011e+06		1.0388e+08		9.59713	0.264672	3.27597	6.08467	0	87.7759	0
1015	I177	508339	13633	167763	2.96222e+06		103893471		9.83098	0.313082	3.55506	6.02712	0	87.7759	0
1020.72	I178	517013	12869	173811	2.94939e+06		103857333		10.0022	0.29564	3.6845	6.00312	0	87.7759	0

## Sheet: Hydride
time [min]:	Peak name	A/B	C	Riv 1	Riv 2	[A/B]	[C]	Sum Hyds	%			1	2													time [min]:	Peak name	1	2
0.0166667	I0	3360.61	21887.4	66.6987	434.403	0.00081557	0.00531174	0.00612731	0.252725	RG Calibration				Flow Calibration												0.0166667	I0	21887.4	3360.61
5.86667	I1	-4196.54	-7580.26	-83.2895	-150.447	-0.00101844	-0.00183962	-0.00285806	-0.117883		Hyd 1	Hyd 2			Hyd1	Hyd 2	1-hexene									5.86667	I1	-7580.26	-4196.54
11.6	I2	22042.5	37015.4	437.482	734.652	0.00534939	0.0089831	0.0143325	0.591154	CF	0.9894	0.9894		0 mL/min	4.56654e+06	4.56654e+06	29142933									11.6	I2	37015.4	22042.5
17.3333	I3	-58456.2	-132665	-1160.19	-2633.03	-0.0141865	-0.0321958	-0.0463823	-1.91307	RG Hyd	203	203		4 mL/min	4.44376e+06	4.44376e+06	6.75363e+06									17.3333	I3	-132665	-58456.2
23.05	I4	-4498.96	165854	-89.2918	3291.73	-0.00109183	0.0402503	0.0391584	1.61512	RG 1H	3.56	3.56		CF	1.14386	1.14386	4.31515									23.05	I4	165854	-4498.96
28.7833	I5	84098.7	267714	1669.12	5313.38	0.0204095	0.0649703	0.0853798	3.52155	Int TMB	6.46061e+07	6.46061e+07														28.7833	I5	267714	84098.7
34.5333	I6	67118.4	284056	1332.11	5637.73	0.0162886	0.0689363	0.085225	3.51516	[TMB]	87.7759	87.7759														34.5333	I6	284056	67118.4
40.2833	I7	109690	365030	2177.04	7244.82	0.0266202	0.0885874	0.115208	4.75182																	40.2833	I7	365030	109690
46	I8	157647	398853	3128.85	7916.12	0.0382586	0.0967957	0.135054	5.57041	IRF	57.6334	57.6334														46	I8	398853	157647
51.75	I9	105809	460128	2100.01	9132.27	0.0256783	0.111666	0.137345	5.66488																	51.75	I9	460128	105809
57.5167	I10	141707	502122	2812.48	9965.72	0.0343901	0.121858	0.156248	6.44455																	57.5167	I10	502122	141707
63.3	I11	204132	649094	4051.45	12882.7	0.0495398	0.157526	0.207066	8.54056																	63.3	I11	649094	204132
69.05	I12	243694	592720	4836.64	11763.8	0.0591409	0.143844	0.202985	8.37227																	69.05	I12	592720	243694
74.8167	I13	264975	659096	5259.01	13081.2	0.0643054	0.159953	0.224258	9.2497																	74.8167	I13	659096	264975
80.5667	I14	289170	743247	5739.22	14751.4	0.0701773	0.180375	0.250552	10.3342																	80.5667	I14	743247	289170
86.3167	I15	282695	747081	5610.72	14827.5	0.068606	0.181306	0.249912	10.3078																	86.3167	I15	747081	282695
92.0333	I16	273159	880099	5421.44	17467.5	0.0662917	0.213587	0.279879	11.5438																	92.0333	I16	880099	273159
97.8	I17	355451	879931	7054.72	17464.2	0.0862629	0.213546	0.299809	12.3658																	97.8	I17	879931	355451
103.567	I18	315269	974696	6257.21	19345	0.0765112	0.236545	0.313056	12.9122																	103.567	I18	974696	315269
109.3	I19	428199	1.02807e+06	8498.55	20404.4	0.103918	0.249498	0.353416	14.5769																	109.3	I19	1.02807e+06	428199
115.033	I20	424090	1.1141e+06	8417.01	22111.8	0.102921	0.270376	0.373297	15.3969																	115.033	I20	1.1141e+06	424090
120.783	I21	408697	1.1777e+06	8111.49	23374.1	0.0991848	0.285811	0.384995	15.8794																	120.783	I21	1.1777e+06	408697
126.533	I22	421354	1.19223e+06	8362.71	23662.5	0.102257	0.289338	0.391594	16.1516																	126.533	I22	1.19223e+06	421354
132.267	I23	484622	1.22347e+06	9618.39	24282.4	0.117611	0.296918	0.414529	17.0975																	132.267	I23	1.22347e+06	484622
138	I24	416275	1.30922e+06	8261.9	25984.4	0.101024	0.317729	0.418752	17.2717																	138	I24	1.30922e+06	416275
143.783	I25	516808	1.29355e+06	10257.2	25673.4	0.125422	0.313926	0.439348	18.1212																	143.783	I25	1.29355e+06	516808
149.5	I26	535328	1.34252e+06	10624.8	26645.3	0.129916	0.32581	0.455726	18.7967																	149.5	I26	1.34252e+06	535328
155.267	I27	567387	1.39662e+06	11261	27719	0.137696	0.338939	0.476635	19.6592																	155.267	I27	1.39662e+06	567387
161	I28	610890	1.47107e+06	12124.5	29196.7	0.148254	0.357008	0.505262	20.8399																	161	I28	1.47107e+06	610890
166.733	I29	590081	1.5782e+06	11711.5	31322.8	0.143204	0.383005	0.526209	21.7039																	166.733	I29	1.5782e+06	590081
172.467	I30	638706	1.50062e+06	12676.5	29783.1	0.155005	0.364179	0.519183	21.4141																	172.467	I30	1.50062e+06	638706
178.183	I31	654187	1.6324e+06	12983.8	32398.5	0.158762	0.396159	0.554921	22.8881																	178.183	I31	1.6324e+06	654187
183.95	I32	656298	1.58876e+06	13025.7	31532.4	0.159274	0.385568	0.544841	22.4724																	183.95	I32	1.58876e+06	656298
189.7	I33	686389	1.62868e+06	13622.9	32324.7	0.166577	0.395256	0.561832	23.1732																	189.7	I33	1.62868e+06	686389
195.417	I34	717772	1.68159e+06	14245.8	33374.8	0.174193	0.408097	0.582289	24.0169																	195.417	I34	1.68159e+06	717772
201.167	I35	740885	1.71451e+06	14704.5	34028.2	0.179802	0.416086	0.595887	24.5778																	201.167	I35	1.71451e+06	740885
206.9	I36	717916	1.67104e+06	14248.6	33165.5	0.174228	0.405537	0.579765	23.9128																	206.9	I36	1.67104e+06	717916
212.633	I37	701211	1.74784e+06	13917.1	34689.7	0.170174	0.424174	0.594348	24.5143																	212.633	I37	1.74784e+06	701211
218.367	I38	754223	1.66371e+06	14969.2	33020	0.183039	0.403758	0.586797	24.2029																	218.367	I38	1.66371e+06	754223
224.1	I39	790496	1.65436e+06	15689.2	32834.3	0.191842	0.401488	0.59333	24.4723																	224.1	I39	1.65436e+06	790496
229.85	I40	763128	1.80954e+06	15146	35914.4	0.1852	0.43915	0.62435	25.7517																	229.85	I40	1.80954e+06	763128
235.583	I41	775003	1.73316e+06	15381.6	34398.4	0.188082	0.420613	0.608694	25.106			Rh concentration														235.583	I41	1.73316e+06	775003
241.317	I42	756981	1.72702e+06	15024	34276.5	0.183708	0.419123	0.602831	24.8642			actual weight (g)	0.0132													241.317	I42	1.72702e+06	756981
247.083	I43	694931	1.83203e+06	13792.4	36360.6	0.16865	0.444606	0.613255	25.2941			MW RhHCO(PPh3)3 (g/mol)	918.78													247.083	I43	1.83203e+06	694931
252.817	I44	768136	1.82764e+06	15245.4	36273.6	0.186415	0.443542	0.629958	25.9831			MW Rh(acac)(CO)2 (g/mol)	258.03													252.817	I44	1.82764e+06	768136
258.567	I45	752088	1.74477e+06	14926.8	34628.7	0.182521	0.423429	0.60595	24.9928			Number of mol (n)	5.11568e-05													258.567	I45	1.74477e+06	752088
264.317	I46	749473	1.7698e+06	14874.9	35125.6	0.181886	0.429505	0.611391	25.2173			actual volume of reaction (L)	0.0211													264.317	I46	1.7698e+06	749473
270.083	I47	644957	1.80137e+06	12800.6	35752.1	0.156522	0.437165	0.593687	24.487			[Rh] (M)	0.00242449													270.083	I47	1.80137e+06	644957
275.8	I48	668898	1.71288e+06	13275.8	33995.9	0.162332	0.415691	0.578023	23.841			[Rh] (mM)	2.42449													275.8	I48	1.71288e+06	668898
281.517	I49	638708	1.78352e+06	12676.6	35397.9	0.155005	0.432834	0.587839	24.2458																	281.517	I49	1.78352e+06	638708
287.267	I50	652890	1.77653e+06	12958.1	35259.1	0.158447	0.431137	0.589584	24.3178																	287.267	I50	1.77653e+06	652890
293.017	I51	655918	1.78004e+06	13018.1	35328.9	0.159182	0.431991	0.591172	24.3833																	293.017	I51	1.78004e+06	655918
298.767	I52	616383	1.78473e+06	12233.5	35421.9	0.149587	0.433127	0.582714	24.0345																	298.767	I52	1.78473e+06	616383
304.517	I53	657468	1.67887e+06	13048.9	33320.9	0.159558	0.407438	0.566995	23.3861																	304.517	I53	1.67887e+06	657468
310.25	I54	668970	1.68152e+06	13277.2	33373.5	0.162349	0.40808	0.570429	23.5278																	310.25	I54	1.68152e+06	668970
316	I55	647209	1.66931e+06	12845.3	33131.2	0.157068	0.405118	0.562186	23.1877																	316	I55	1.66931e+06	647209
321.75	I56	637738	1.6546e+06	12657.3	32839.2	0.15477	0.401547	0.556317	22.9457			13.2871														321.75	I56	1.6546e+06	637738
327.5	I57	641577	1.6143e+06	12733.5	32039.5	0.155701	0.391768	0.547469	22.5808																	327.5	I57	1.6143e+06	641577
333.233	I58	659642	1.55022e+06	13092	30767.5	0.160085	0.376215	0.5363	22.1201																	333.233	I58	1.55022e+06	659642
338.983	I59	465916	1.59713e+06	9247.13	31698.6	0.113071	0.3876	0.500671	20.6505																	338.983	I59	1.59713e+06	465916
344.717	I60	555324	1.59681e+06	11021.6	31692.3	0.134769	0.387523	0.522292	21.5423																	344.717	I60	1.59681e+06	555324
350.467	I61	537730	1.55094e+06	10672.4	30781.9	0.130499	0.376391	0.50689	20.9071																	350.467	I61	1.55094e+06	537730
356.2	I62	517825	1.56989e+06	10277.4	31158	0.125669	0.38099	0.506659	20.8975																	356.2	I62	1.56989e+06	517825
361.95	I63	524493	1.5941e+06	10409.7	31638.5	0.127287	0.386866	0.514152	21.2066																	361.95	I63	1.5941e+06	524493
367.683	I64	600063	1.48912e+06	11909.6	29554.9	0.145626	0.361388	0.507014	20.9121																	367.683	I64	1.48912e+06	600063
373.4	I65	406252	1.48272e+06	8062.96	29427.9	0.0985913	0.359835	0.458426	18.9081																	373.4	I65	1.48272e+06	406252
379.133	I66	484797	1.50683e+06	9621.88	29906.4	0.117653	0.365686	0.483339	19.9357																	379.133	I66	1.50683e+06	484797
384.867	I67	407733	1.47104e+06	8092.37	29196.1	0.0989509	0.357001	0.455952	18.8061																	384.867	I67	1.47104e+06	407733
390.617	I68	379616	1.41399e+06	7534.33	28063.7	0.0921273	0.343154	0.435281	17.9535																	390.617	I68	1.41399e+06	379616
396.35	I69	434184	1.3759e+06	8617.35	27307.8	0.10537	0.333911	0.439281	18.1185																	396.35	I69	1.3759e+06	434184
402.067	I70	403441	1.37939e+06	8007.19	27377.1	0.0979093	0.334758	0.432667	17.8457																	402.067	I70	1.37939e+06	403441
407.767	I71	434233	1.40273e+06	8618.31	27840.3	0.105382	0.340422	0.445804	18.3875																	407.767	I71	1.40273e+06	434233
413.467	I72	387217	1.28432e+06	7685.17	25490.1	0.0939718	0.311685	0.405657	16.7316																	413.467	I72	1.28432e+06	387217
419.2	I73	399390	1.29219e+06	7926.77	25646.4	0.0969261	0.313595	0.410521	16.9322																	419.2	I73	1.29219e+06	399390
424.95	I74	386850	1.23496e+06	7677.88	24510.4	0.0938827	0.299706	0.393588	16.2338																	424.95	I74	1.23496e+06	386850
430.7	I75	319002	1.21701e+06	6331.3	24154.2	0.0774171	0.29535	0.372767	15.375																	430.7	I75	1.21701e+06	319002
436.4	I76	332846	1.26465e+06	6606.06	25099.7	0.0807768	0.306911	0.387688	15.9905																	436.4	I76	1.26465e+06	332846
442.15	I77	307166	1.22209e+06	6096.39	24255.1	0.0745447	0.296583	0.371128	15.3074																	442.15	I77	1.22209e+06	307166
447.883	I78	407146	1.13058e+06	8080.72	22438.8	0.0988085	0.274375	0.373183	15.3922																	447.883	I78	1.13058e+06	407146
453.6	I79	350189	1.17654e+06	6950.27	23351	0.0849857	0.285529	0.370514	15.2821																	453.6	I79	1.17654e+06	350189
459.317	I80	379744	1.17005e+06	7536.87	23222.1	0.0921584	0.283953	0.376111	15.513																	459.317	I80	1.17005e+06	379744
465.083	I81	306140	1.11679e+06	6076.03	22165.2	0.0742957	0.271029	0.345324	14.2431																	465.083	I81	1.11679e+06	306140
470.833	I82	370143	1.002e+06	7346.3	19886.9	0.0898282	0.243171	0.332999	13.7348																	470.833	I82	1.002e+06	370143
476.583	I83	278910	1.06119e+06	5535.58	21061.6	0.0676873	0.257535	0.325222	13.414																	476.583	I83	1.06119e+06	278910
482.333	I84	342566	1.07706e+06	6798.98	21376.5	0.0831358	0.261386	0.344521	14.21																	482.333	I84	1.07706e+06	342566
488.083	I85	287726	1.0397e+06	5710.56	20635.1	0.0698268	0.252319	0.322146	13.2871																	488.083	I85	1.0397e+06	287726
493.867	I86	238914	992118	4741.77	19690.8	0.0579808	0.240773	0.298753	12.3223																	493.867	I86	992118	238914
499.633	I87	214970	1.02842e+06	4266.56	20411.3	0.0521702	0.249583	0.301753	12.446																	499.633	I87	1.02842e+06	214970
505.383	I88	338232	968153	6712.96	19215.1	0.082084	0.234957	0.31704	13.0766																	505.383	I88	968153	338232
511.117	I89	268706	969207	5333.06	19236	0.0652109	0.235212	0.300423	12.3912																	511.117	I89	969207	268706
516.883	I90	207500	904564	4118.3	17953.1	0.0503572	0.219524	0.269882	11.1315																	516.883	I90	904564	207500
522.617	I91	307020	915799	6093.49	18176.1	0.0745092	0.222251	0.29676	12.2401																	522.617	I91	915799	307020
528.367	I92	291090	905048	5777.32	17962.7	0.0706433	0.219642	0.290285	11.973																	528.367	I92	905048	291090
534.1	I93	265606	935554	5271.55	18568.1	0.0644588	0.227045	0.291504	12.0233																	534.1	I93	935554	265606
539.817	I94	252232	789401	5006.1	15667.4	0.061213	0.191576	0.252789	10.4265																	539.817	I94	789401	252232
545.583	I95	247386	866245	4909.93	17192.5	0.060037	0.210225	0.270262	11.1471																	545.583	I95	866245	247386
551.317	I96	273606	843954	5430.31	16750.1	0.0664001	0.204815	0.271215	11.1865																	551.317	I96	843954	273606
557.033	I97	-249450	-670359	-4950.89	-13304.8	0.0661	0.19	0.2561	10.563																	557.033	I97	-670359	-249450
562.767	I98	270557	768671	5369.81	15256	0.0656603	0.186545	0.252205	10.4024																	562.767	I98	768671	270557
568.517	I99	241885	858151	4800.74	17031.9	0.0587019	0.208261	0.266963	11.0111																	568.517	I99	858151	241885
574.217	I100	213549	794051	4238.36	15759.7	0.0518253	0.192705	0.24453	10.0858																	574.217	I100	794051	213549
579.95	I101	182319	780401	3618.52	15488.8	0.0442462	0.189392	0.233638	9.63656																	579.95	I101	780401	182319
585.667	I102	160150	745592	3178.52	14797.9	0.0388659	0.180944	0.21981	9.06623																	585.667	I102	745592	160150
591.383	I103	228918	785588	4543.38	15591.7	0.055555	0.190651	0.246206	10.1549																	591.383	I103	785588	228918
597.117	I104	254628	715650	5053.66	14203.7	0.0617945	0.173678	0.235472	9.71222																	597.117	I104	715650	254628
602.817	I105	156834	701046	3112.72	13913.8	0.0380613	0.170134	0.208195	8.58715																	602.817	I105	701046	156834
608.55	I106	231913	674846	4602.82	13393.8	0.0562818	0.163775	0.220057	9.07641																	608.55	I106	674846	231913
614.267	I107	205043	659191	4069.53	13083.1	0.0497609	0.159976	0.209737	8.65074																	614.267	I107	659191	205043
620	I108	167448	632685	3323.37	12557	0.0406371	0.153543	0.19418	8.00911																	620	I108	632685	167448
625.717	I109	172463	644158	3422.91	12784.7	0.0418542	0.156328	0.198182	8.17415																	625.717	I109	644158	172463
631.467	I110	202766	720120	4024.34	14292.4	0.0492084	0.174763	0.223971	9.23784																	631.467	I110	720120	202766
637.167	I111	173922	575811	3451.86	11428.2	0.0422083	0.139741	0.181949	7.50462																	637.167	I111	575811	173922
642.9	I112	147236	647682	2922.22	12854.7	0.0357319	0.157183	0.192915	7.95691																	642.9	I112	647682	147236
648.633	I113	210147	599865	4170.83	11905.7	0.0509996	0.145578	0.196578	8.108																	648.633	I113	599865	210147
654.35	I114	202079	561897	4010.7	11152.1	0.0490416	0.136364	0.185406	7.64719																	654.35	I114	561897	202079
660.083	I115	189823	554707	3767.45	11009.4	0.0460672	0.134619	0.180686	7.45254																	660.083	I115	554707	189823
665.783	I116	151585	632509	3008.55	12553.5	0.0367875	0.153501	0.190288	7.84857																	665.783	I116	632509	151585
671.483	I117	168130	541738	3336.91	10752	0.0408027	0.131472	0.172275	7.10558																	671.483	I117	541738	168130
677.183	I118	129648	554079	2573.15	10996.9	0.0314636	0.134467	0.165931	6.84392																	677.183	I118	554079	129648
682.917	I119	147951	491443	2936.41	9753.77	0.0359055	0.119266	0.155171	6.40016																	682.917	I119	491443	147951
688.633	I120	93856.1	502350	1862.78	9970.25	0.0227775	0.121913	0.14469	5.96786																	688.633	I120	502350	93856.1
694.35	I121	145962	505419	2896.93	10031.2	0.0354228	0.122658	0.158081	6.52015																	694.35	I121	505419	145962
700.083	I122	112445	511677	2231.72	10155.4	0.0272888	0.124176	0.151465	6.24729																	700.083	I122	511677	112445
705.817	I123	118972	611754	2361.27	12141.6	0.0288728	0.148464	0.177336	7.31437																	705.817	I123	611754	118972
711.567	I124	109002	492483	2163.39	9774.42	0.0264533	0.119518	0.145972	6.02071																	711.567	I124	492483	109002
717.283	I125	147412	494884	2925.72	9822.08	0.0357748	0.120101	0.155876	6.42922																	717.283	I125	494884	147412
722.983	I126	120486	496392	2391.32	9852	0.0292403	0.120467	0.149707	6.17479																	722.983	I126	496392	120486
728.717	I127	138716	529956	2753.13	10518.2	0.0336644	0.128613	0.162277	6.69323																	728.717	I127	529956	138716
734.433	I128	115781	510991	2297.94	10141.7	0.0280984	0.12401	0.152108	6.27382																	734.433	I128	510991	115781
740.15	I129	86821.8	470496	1723.17	9338.04	0.0210704	0.114183	0.135253	5.5786																	740.15	I129	470496	86821.8
745.883	I130	105396	477902	2091.81	9485.01	0.025578	0.11598	0.141558	5.83865																	745.883	I130	477902	105396
751.6	I131	117521	443373	2332.47	8799.72	0.0285207	0.1076	0.136121	5.6144																	751.6	I131	443373	117521
757.35	I132	130031	453892	2580.76	9008.5	0.0315567	0.110153	0.14171	5.84492																	757.35	I132	453892	130031
763.05	I133	144418	442354	2866.29	8779.49	0.0350481	0.107353	0.142401	5.87343																	763.05	I133	442354	144418
768.767	I134	101018	449099	2004.92	8913.37	0.0245155	0.10899	0.133505	5.50652																	768.767	I134	449099	101018
774.5	I135	112753	487311	2237.84	9671.77	0.0273636	0.118263	0.145627	6.00648																	774.5	I135	487311	112753
780.183	I136	156897	407490	3113.96	8087.55	0.0380766	0.098892	0.136969	5.64936																	780.183	I136	407490	156897
785.917	I137	130896	445070	2597.92	8833.4	0.0317665	0.108012	0.139779	5.76526																	785.917	I137	445070	130896
791.65	I138	101078	401374	2006.12	7966.16	0.0245301	0.0974077	0.121938	5.02941																	791.65	I138	401374	101078
797.383	I139	76688.3	401472	1522.05	7968.09	0.0186111	0.0974313	0.116042	4.78625																	797.383	I139	401472	76688.3
803.083	I140	126504	457785	2510.75	9085.76	0.0307007	0.111098	0.141798	5.84858																	803.083	I140	457785	126504
808.8	I141	104462	413873	2073.29	8214.22	0.0253515	0.100441	0.125792	5.1884																	808.8	I141	413873	104462
814.55	I142	32707	410496	649.142	8147.2	0.0079375	0.0996214	0.107559	4.43634																	814.55	I142	410496	32707
820.25	I143	146909	369909	2915.74	7341.67	0.0356528	0.0897716	0.125424	5.17322																	820.25	I143	369909	146909
826	I144	8043.23	387512	159.636	7691.03	0.00195197	0.0940434	0.0959954	3.9594																	826	I144	387512	8043.23
831.733	I145	109467	343604	2172.61	6819.58	0.026566	0.0833876	0.109954	4.53511																	831.733	I145	343604	109467
837.433	I146	82882	381710	1644.98	7575.88	0.0201142	0.0926354	0.11275	4.65044																	837.433	I146	381710	82882
843.167	I147	106141	399079	2106.6	7920.6	0.0257588	0.0968505	0.122609	5.05711																	843.167	I147	399079	106141
848.883	I148	111537	344684	2213.71	6841.01	0.0270685	0.0836497	0.110718	4.56665																	848.883	I148	344684	111537
854.617	I149	71196.7	315648	1413.06	6264.74	0.0172784	0.0766033	0.0938817	3.87222																	854.617	I149	315648	71196.7
860.367	I150	91005.3	407223	1806.2	8082.24	0.0220857	0.0988271	0.120913	4.98713																	860.367	I150	407223	91005.3
866.067	I151	38235.3	389589	758.863	7732.26	0.00927914	0.0945476	0.103827	4.28241																	866.067	I151	389589	38235.3
871.8	I152	74500.3	383557	1478.62	7612.53	0.0180801	0.0930836	0.111164	4.58503																	871.8	I152	383557	74500.3
877.517	I153	68831.5	406195	1366.11	8061.84	0.0167044	0.0985777	0.115282	4.75489																	877.517	I153	406195	68831.5
883.233	I154	84483.1	343292	1676.75	6813.38	0.0205028	0.0833119	0.103815	4.28191																	883.233	I154	343292	84483.1
888.95	I155	59067.4	343742	1172.32	6822.33	0.0143348	0.0834212	0.097756	4.03202																	888.95	I155	343742	59067.4
894.65	I156	70860	353930	1406.37	7024.53	0.0171967	0.0858937	0.10309	4.25204																	894.65	I156	353930	70860
900.383	I157	70016.5	335779	1389.63	6664.27	0.016992	0.0814885	0.0984805	4.0619																	900.383	I157	335779	70016.5
906.133	I158	95204.2	305514	1889.54	6063.61	0.0231047	0.0741439	0.0972485	4.01108																	906.133	I158	305514	95204.2
911.867	I159	96353.6	375788	1912.35	7458.35	0.0233836	0.0911983	0.114582	4.72601																	911.867	I159	375788	96353.6
917.567	I160	44769.9	395799	888.557	7855.52	0.010865	0.0960547	0.10692	4.40998																	917.567	I160	395799	44769.9
923.283	I161	37284.1	325500	739.986	6460.27	0.00904831	0.0789941	0.0880424	3.63137																	923.283	I161	325500	37284.1
929.033	I162	116331	361155	2308.85	7167.93	0.0282319	0.0876471	0.115879	4.77951																	929.033	I162	361155	116331
934.767	I163	95460.6	378768	1894.63	7517.5	0.0231669	0.0919216	0.115088	4.7469																	934.767	I163	378768	95460.6
940.517	I164	62193.2	308201	1234.36	6116.92	0.0150934	0.0747958	0.0898892	3.70754																	940.517	I164	308201	62193.2
946.283	I165	77409.3	351484	1536.36	6975.97	0.0187861	0.0853	0.104086	4.2931																	946.283	I165	351484	77409.3
952	I166	63825.9	334895	1266.77	6646.73	0.0154896	0.0812741	0.0967637	3.99109																	952	I166	334895	63825.9
957.733	I167	111990	297712	2222.69	5908.76	0.0271783	0.0722504	0.0994288	4.10101																	957.733	I167	297712	111990
963.45	I168	92630	291271	1838.45	5780.91	0.02248	0.0706871	0.0931671	3.84274																	963.45	I168	291271	92630
969.167	I169	78472.1	331293	1557.45	6575.24	0.019044	0.0803999	0.0994439	4.10164																	969.167	I169	331293	78472.1
974.883	I170	50415.3	302769	1000.6	6009.13	0.012235	0.0734777	0.0857127	3.53528																	974.883	I170	302769	50415.3
980.583	I171	83543.7	276477	1658.11	5487.3	0.0202748	0.067097	0.0873718	3.60371																	980.583	I171	276477	83543.7
986.333	I172	48230.5	305294	957.24	6059.24	0.0117048	0.0740904	0.0857953	3.53869																	986.333	I172	305294	48230.5
992.067	I173	73365.2	292652	1456.09	5808.34	0.0178047	0.0710225	0.0888271	3.66374																	992.067	I173	292652	73365.2
997.767	I174	80733.8	373395	1602.34	7410.84	0.0195929	0.0906174	0.11021	4.5457																	997.767	I174	373395	80733.8
1003.53	I175	86213.1	344227	1711.09	6831.95	0.0209227	0.0835389	0.104462	4.30859																	1003.53	I175	344227	86213.1
1009.27	I176	22567.3	322161	447.898	6393.99	0.00547676	0.0781837	0.0836604	3.45063																	1009.27	I176	322161	22567.3
1014.98	I177	61027.6	276246	1211.23	5482.71	0.0148105	0.0670408	0.0818513	3.37602																	1014.98	I177	276246	61027.6
1020.72	I178	15980.8	272975	317.174	5417.8	0.00387831	0.0662471	0.0701254	2.89237																	1020.72	I178	272975	15980.8

## Sheet: Phosphorus
time [min]:	Peak name	internal standard #1	OPPh3	PPh3	A/B	C	[PPh3]	[OPPh3]	[A/B]	[C]	V	total phosphorus		when phosphorus source is PPH3											time [min]:	Peak name	1	2	3	4	5
0.0166667	I0	1.72987e+08	4.46998e+06	-539835	-358891	-409434	-0.10844	0.42456	-0.012005	-0.00913046	-0.0174883	0.264719													0.0166667	I0	-409434	-358891	4.46998e+06	-539835	1.72987e+08
5.71667	I1	1.50006e+08	3.20201e+06	-275774	-126113	-580320	-0.0638836	0.350722	-0.00486483	-0.0149239	-0.0285851	0.232337		INTERNAL REFERENCE (CF SPECTRUM)			FLOW CALIBRATION								5.71667	I1	-580320	-126113	3.20201e+06	-275774	1.50006e+08
11.45	I2	1.52402e+08	4.42324e+06	-145450	-586111	-583738	-0.0331641	0.476867	-0.0222538	-0.0147758	-0.0283013	0.354868		Triphenylphosphine mass (g)	0.0264			Triphenylphosphosphate	Peak 1	Peak 2	Peak 3				11.45	I2	-583738	-586111	4.42324e+06	-145450	1.52402e+08
17.1833	I3	1.5336e+08	4.40941e+06	-121240	132107	1.78018e+06	-0.0274711	0.472405	0.00498456	0.0447788	0.0857687	0.58924		Triphenylphosphine n (moles)	0.000100652		0 mL/min	5.70293e+07	7.98011e+07	3.48921e+06	1.26911e+07	2720052			17.1833	I3	1.78018e+06	132107	4.40941e+06	-121240	1.5336e+08
22.9167	I4	1.56021e+08	4800958	-1.34696e+06	-474775	919974	-0.299996	0.505584	-0.0176084	0.0227466	0.0435684	0.238611		Reaction Volume (L)	0.0224		4 mL/min	1.74532e+07	1.0222e+07	945257	6.42578e+06	1.02344e+06			22.9167	I4	919974	-474775	4800958	-1.34696e+06	1.56021e+08
28.65	I5	1.57295e+08	4.72948e+06	684274	643649	3.40042e+06	0.151167	0.494021	0.0236782	0.0833951	0.159734	0.94273		Triphenylphosphine concentration (M)	0.00449339		CF	3.26756	7.80679	3.69128	2.6	3.32			28.65	I5	3.40042e+06	643649	4.72948e+06	684274	1.57295e+08
34.4167	I6	1.58949e+08	4.97813e+06	74883.1	638559	2.75396e+06	0.0163708	0.514586	0.0232466	0.0668382	0.128021	0.777964		Triphenylphosphine concentration (mM)	4.49339			internal standard			#	acyl cpmplex			34.4167	I6	2.75396e+06	638559	4.97813e+06	74883.1	1.58949e+08
40.15	I7	1.60081e+08	5.34509e+06	-790349	409883	3.52185e+06	-0.171562	0.548608	0.0148161	0.0848698	0.162558	0.661287													40.15	I7	3.52185e+06	409883	5.34509e+06	-790349	1.60081e+08
45.8667	I8	1.60448e+08	5.69029e+06	-328258	456271	4.8667e+06	-0.0710926	0.582703	0.0164552	0.11701	0.224119	0.89555													45.8667	I8	4.8667e+06	456271	5.69029e+06	-328258	1.60448e+08
51.6333	I9	1.62491e+08	5.21268e+06	168092	-269768	6.10745e+06	0.0359469	0.527084	-0.00960673	0.144995	0.277722	0.978804		[Triphenylphosphate] ACTUAL EXPERIMENT											51.6333	I9	6.10745e+06	-269768	5.21268e+06	168092	1.62491e+08
57.3833	I10	1.63397e+08	5.98308e+06	772798	784844	5.57053e+06	0.164349	0.60163	0.0277942	0.131515	0.251902	1.21611		Triphenylphosphate mass (g)	0.1063	from this reaction									57.3833	I10	5.57053e+06	784844	5.98308e+06	772798	1.63397e+08
63.1667	I11	1.62128e+08	5.16983e+06	612679	1.31946e+06	6.62567e+06	0.131317	0.523922	0.0470929	0.157651	0.301962	1.22238		Triphenylphosphate n (moles)	0.000325794										63.1667	I11	6.62567e+06	1.31946e+06	5.16983e+06	612679	1.62128e+08
68.9167	I12	1.61731e+08	6.40442e+06	-262.688	593379	7.22525e+06	-5.64405e-05	0.650632	0.0212302	0.172339	0.330096	1.21005		Reaction Volume (L)	0.0224										68.9167	I12	7.22525e+06	593379	6.40442e+06	-262.688	1.61731e+08
74.6833	I13	1.61954e+08	5806208	363165	1.58076e+06	7.98676e+06	0.0779212	0.589046	0.0564794	0.19024	0.364383	1.35065		Triphenylphosphate concentration (M)	0.0145444										74.6833	I13	7.98676e+06	1.58076e+06	5806208	363165	1.61954e+08
80.4333	I14	1.63139e+08	5.96824e+06	276784	1.37858e+06	9.0629e+06	0.0589561	0.601087	0.0488979	0.214306	0.410478	1.40076		Triphenylphosphate concentration (mM)	14.5444										80.4333	I14	9.0629e+06	1.37858e+06	5.96824e+06	276784	1.63139e+08
86.1667	I15	1.65034e+08	5.56856e+06	-113393	1.62074e+06	9.88807e+06	-0.0238756	0.554392	0.0568268	0.231132	0.442707	1.33757													86.1667	I15	9.88807e+06	1.62074e+06	5.56856e+06	-113393	1.65034e+08
91.9167	I16	1.6481e+08	5.93988e+06	246954	2.19816e+06	9.97191e+06	0.0520688	0.592165	0.0771775	0.23341	0.447069	1.49882													91.9167	I16	9.97191e+06	2.19816e+06	5.93988e+06	246954	1.6481e+08
97.6667	I17	1.65198e+08	5014483	-641484	2.59054e+06	1.02517e+07	-0.134935	0.498736	0.0907404	0.239394	0.458532	1.26346													97.6667	I17	1.02517e+07	2.59054e+06	5014483	-641484	1.65198e+08
103.433	I18	1.65537e+08	6.04149e+06	-293714	2.39027e+06	1.15159e+07	-0.0616555	0.599647	0.0835535	0.268365	0.514022	1.51019													103.433	I18	1.15159e+07	2.39027e+06	6.04149e+06	-293714	1.65537e+08
109.183	I19	1.64485e+08	6091263	-499915	1895845	1.19719e+07	-0.105612	0.608455	0.0666946	0.280777	0.537796	1.47856								No CF from this reaction as the complexes had dissapeard					109.183	I19	1.19719e+07	1895845	6091263	-499915	1.64485e+08
114.9	I20	1.65565e+08	6.89422e+06	-385278	2.00215e+06	1.208e+07	-0.0808631	0.684173	0.069975	0.281465	0.539113	1.58765													114.9	I20	1.208e+07	2.00215e+06	6.89422e+06	-385278	1.65565e+08
120.667	I21	1.64881e+08	6.69818e+06	-562544	2.65798e+06	1.36707e+07	-0.118558	0.667474	0.0932816	0.319847	0.612631	1.69502		when phosphorus source is RhHCOPPh33											120.667	I21	1.36707e+07	2.65798e+06	6.69818e+06	-562544	1.64881e+08
126.417	I22	1.65289e+08	5.84278e+06	782790	3.41759e+06	1.35747e+07	0.164568	0.580798	0.119644	0.31682	0.606832	1.93511													126.417	I22	1.35747e+07	3.41759e+06	5.84278e+06	782790	1.65289e+08
132.133	I23	1.63118e+08	6.87619e+06	-159362	2.3988e+06	1.53922e+07	-0.033949	0.69262	0.0850957	0.364019	0.697237	1.92092		Rh concentration											132.133	I23	1.53922e+07	2.3988e+06	6.87619e+06	-159362	1.63118e+08
137.883	I24	1.62146e+08	6.55586e+06	875923	2.72605e+06	1.61707e+07	0.187717	0.66431	0.0972841	0.384719	0.736886	2.20075		actual weight (g)	0.0132										137.883	I24	1.61707e+07	2.72605e+06	6.55586e+06	875923	1.62146e+08
143.65	I25	1.61344e+08	7357416	-108718	3.75181e+06	1.61732e+07	-0.023415	0.749241	0.134556	0.386695	0.740669	2.15502		MW RhHCO(PPh3)3 (g/mol)	918.78										143.65	I25	1.61732e+07	3.75181e+06	7357416	-108718	1.61344e+08
149.383	I26	1.73287e+08	6.53874e+06	188240	3.20363e+06	1.73132e+07	0.0377476	0.619979	0.106977	0.385421	0.73823	2.02794		MW Rh(acac)(CO)2 (g/mol)	258.03										149.383	I26	1.73132e+07	3.20363e+06	6.53874e+06	188240	1.73287e+08
155.15	I27	1.64436e+08	7.11625e+06	430470	4.3297e+06	1.67073e+07	0.0909681	0.711053	0.152362	0.391951	0.750737	2.2826		Number of mol (n)	5.11568e-05										155.15	I27	1.67073e+07	4.3297e+06	7.11625e+06	430470	1.64436e+08
160.867	I28	1.62866e+08	5.63886e+06	804030	4.2019e+06	1.69113e+07	0.171548	0.568864	0.149289	0.400562	0.767231	2.24068		actual volume of reaction (L)	0.0211										160.867	I28	1.69113e+07	4.2019e+06	5.63886e+06	804030	1.62866e+08
166.6	I29	1.63187e+08	7.53872e+06	-62884.2	3.81352e+06	18027104	-0.0133906	0.759031	0.135224	0.426151	0.816242	2.29454		[Rh] (M)	0.00242449										166.6	I29	18027104	3.81352e+06	7.53872e+06	-62884.2	1.63187e+08
172.317	I30	1.62852e+08	6.79413e+06	524181	3.73332e+06	1.9212e+07	0.111849	0.685469	0.132653	0.455096	0.871683	2.42791		[Rh] (mM)	2.42449		[PPh3]	7.27348							172.317	I30	1.9212e+07	3.73332e+06	6.79413e+06	524181	1.62852e+08
178.067	I31	1.63197e+08	6.73858e+06	355112	3.98302e+06	2.06204e+07	0.0756132	0.678429	0.141226	0.487425	0.933607	2.49877													178.067	I31	2.06204e+07	3.98302e+06	6.73858e+06	355112	1.63197e+08
183.833	I32	1.62913e+08	7.71092e+06	266573	5.23997e+06	2.07093e+07	0.0568597	0.777676	0.186118	0.490381	0.939267	2.67791													183.833	I32	2.07093e+07	5.23997e+06	7.71092e+06	266573	1.62913e+08
189.567	I33	1.63063e+08	7.50088e+06	464339	5.8982e+06	2.10533e+07	0.0989515	0.755794	0.209304	0.498065	0.953985	2.76755													189.567	I33	2.10533e+07	5.8982e+06	7.50088e+06	464339	1.63063e+08
195.3	I34	1.62175e+08	7.15034e+06	405733	4.8454e+06	2.08053e+07	0.0869362	0.724421	0.172886	0.494895	0.947914	2.64181													195.3	I34	2.08053e+07	4.8454e+06	7.15034e+06	405733	1.62175e+08
201.017	I35	1.63212e+08	7.03596e+06	833879	6.189e+06	2.29156e+07	0.177539	0.708302	0.219423	0.541629	1.03743	2.94957													201.017	I35	2.29156e+07	6.189e+06	7.03596e+06	833879	1.63212e+08
206.767	I36	1.64113e+08	6388797	655260	5.71511e+06	2.23805e+07	0.138744	0.639623	0.20151	0.526078	1.00764	2.75962													206.767	I36	2.23805e+07	5.71511e+06	6388797	655260	1.64113e+08
212.5	I37	1.6377e+08	7.2653e+06	547515	5.92208e+06	2.25765e+07	0.116173	0.728897	0.209244	0.531795	1.01859	2.85894													212.5	I37	2.25765e+07	5.92208e+06	7.2653e+06	547515	1.6377e+08
218.233	I38	1.63545e+08	8.0236e+06	942610	5.30826e+06	2.33453e+07	0.20028	0.806083	0.187815	0.550662	1.05473	3.03398													218.233	I38	2.33453e+07	5.30826e+06	8.0236e+06	942610	1.63545e+08
223.967	I39	1.62436e+08	7.37707e+06	1.51084e+06	7047269	2.44923e+07	0.323207	0.74619	0.251046	0.581661	1.11411	3.31647													223.967	I39	2.44923e+07	7047269	7.37707e+06	1.51084e+06	1.62436e+08
229.717	I40	1.62208e+08	7.70625e+06	1.02546e+06	5.89952e+06	2.32215e+07	0.21968	0.780584	0.210455	0.552259	1.05779	3.07795													229.717	I40	2.32215e+07	5.89952e+06	7.70625e+06	1.02546e+06	1.62208e+08
235.467	I41	1.62808e+08	7.76981e+06	720680	5.9099e+06	2.3023e+07	0.153819	0.784121	0.210048	0.545519	1.04488	2.99459													235.467	I41	2.3023e+07	5.9099e+06	7.76981e+06	720680	1.62808e+08
241.2	I42	1.63319e+08	9.14717e+06	503933	6.13306e+06	2.42921e+07	0.107221	0.920235	0.217298	0.573789	1.09903	3.18342													241.2	I42	2.42921e+07	6.13306e+06	9.14717e+06	503933	1.63319e+08
246.95	I43	1.62982e+08	8.45107e+06	2.22357e+06	5.46414e+06	2.41761e+07	0.474084	0.851962	0.193998	0.572229	1.09604	3.43073													246.95	I43	2.41761e+07	5.46414e+06	8.45107e+06	2.22357e+06	1.62982e+08
252.7	I44	1.63884e+08	8.31528e+06	1.97092e+06	6.98507e+06	2.44445e+07	0.417904	0.833659	0.246632	0.575399	1.10211	3.47102													252.7	I44	2.44445e+07	6.98507e+06	8.31528e+06	1.97092e+06	1.63884e+08
258.45	I45	1.64415e+08	9126038	1.054e+06	5.31101e+06	2.3709e+07	0.222762	0.911987	0.186917	0.556281	1.06549	3.17743													258.45	I45	2.3709e+07	5.31101e+06	9126038	1.054e+06	1.64415e+08
264.183	I46	1.67183e+08	8.37257e+06	1.03885e+06	5.11061e+06	2.53718e+07	0.215927	0.82284	0.176887	0.585442	1.12135	3.14887													264.183	I46	2.53718e+07	5.11061e+06	8.37257e+06	1.03885e+06	1.67183e+08
269.933	I47	1.67639e+08	8.73017e+06	2.18733e+06	5.11067e+06	2.39028e+07	0.453403	0.85565	0.176408	0.550044	1.05355	3.312													269.933	I47	2.39028e+07	5.11067e+06	8.73017e+06	2.18733e+06	1.67639e+08
275.65	I48	1.65564e+08	9.05614e+06	977317	6.50155e+06	2.52369e+07	0.205122	0.898719	0.227229	0.588019	1.12628	3.32236													275.65	I48	2.52369e+07	6.50155e+06	9.05614e+06	977317	1.65564e+08
281.4	I49	1.63814e+08	9.15233e+06	1.79762e+06	5.07554e+06	2.43192e+07	0.381321	0.91797	0.179286	0.572693	1.09693	3.37594													281.4	I49	2.43192e+07	5.07554e+06	9.15233e+06	1.79762e+06	1.63814e+08
287.15	I50	1.64786e+08	9.06126e+06	1.04872e+06	4.57411e+06	2.40308e+07	0.221149	0.903477	0.160621	0.562565	1.07753	3.13356											6.51792		287.15	I50	2.40308e+07	4.57411e+06	9.06126e+06	1.04872e+06	1.64786e+08
292.867	I51	1.63551e+08	9195742	2.27339e+06	4.83176e+06	2.46137e+07	0.48302	0.92381	0.17095	0.580562	1.112	3.49042											7.45221		292.867	I51	2.46137e+07	4.83176e+06	9195742	2.27339e+06	1.63551e+08
298.65	I52	1.63459e+08	9.23864e+06	1.59288e+06	5.13228e+06	2.45671e+07	0.338625	0.928641	0.181684	0.579788	1.11052	3.37											6.90797		298.65	I52	2.45671e+07	5.13228e+06	9.23864e+06	1.59288e+06	1.63459e+08
304.383	I53	1.63614e+08	9.47463e+06	1.95679e+06	7.48925e+06	24786328	0.415592	0.951458	0.26487	0.584406	1.11936	3.65001													304.383	I53	24786328	7.48925e+06	9.47463e+06	1.95679e+06	1.63614e+08
310.133	I54	1.65103e+08	1.03667e+07	2.08944e+06	5.69861e+06	2.4344e+07	0.439761	1.03165	0.199723	0.5688	1.08947	3.57726													310.133	I54	2.4344e+07	5.69861e+06	1.03667e+07	2.08944e+06	1.65103e+08
315.883	I55	1.65446e+08	8.14394e+06	2.22673e+06	3.97444e+06	2.38115e+07	0.467687	0.808772	0.139006	0.555205	1.06343	3.22009													315.883	I55	2.38115e+07	3.97444e+06	8.14394e+06	2.22673e+06	1.65446e+08
321.633	I56	1.64233e+08	9.65153e+06	1.90353e+06	5764394	2.36215e+07	0.402755	0.965567	0.203098	0.554841	1.06273	3.43904													321.633	I56	2.36215e+07	5764394	9.65153e+06	1.90353e+06	1.64233e+08
327.367	I57	163933756	1.03039e+07	2.70486e+06	4.69226e+06	2.41908e+07	0.57335	1.03271	0.165626	0.569252	1.09034	3.64507													327.367	I57	2.41908e+07	4.69226e+06	1.03039e+07	2.70486e+06	163933756
333.117	I58	1.63841e+08	1.03221e+07	2.11216e+06	4.92535e+06	2.32545e+07	0.447968	1.03512	0.173952	0.547528	1.04873	3.47358										Object	Integral [abs]	Integral [rel]	333.117	I58	2.32545e+07	4.92535e+06	1.03221e+07	2.11216e+06	1.63841e+08
338.85	I59	1.65059e+08	9.4157e+06	2.00327e+06	4.67968e+06	2.31416e+07	0.421738	0.93726	0.164055	0.540849	1.03593	3.30965										Integral 1	1.6066e+06	0.7651	338.85	I59	2.31416e+07	4.67968e+06	9.4157e+06	2.00327e+06	1.65059e+08
344.6	I60	1.64968e+08	1.05377e+07	2.48886e+06	3.70754e+06	2.31675e+07	0.524256	1.04953	0.130047	0.541754	1.03767	3.45914										Integral 2	1.63721e+06	0.7797	344.6	I60	2.31675e+07	3.70754e+06	1.05377e+07	2.48886e+06	1.64968e+08
350.333	I61	1.64223e+08	1.12305e+07	1.58734e+06	3.64174e+06	2.23214e+07	0.335877	1.12361	0.128319	0.524339	1.00431	3.28914										Integral 3	2.44396e+07	11.6394	350.333	I61	2.23214e+07	3.64174e+06	1.12305e+07	1.58734e+06	1.64223e+08
356.083	I62	1.63716e+08	1.04591e+07	2.19806e+06	4.38446e+06	2.40347e+07	0.466544	1.04967	0.154967	0.566332	1.08474	3.52515													356.083	I62	2.40347e+07	4.38446e+06	1.04591e+07	2.19806e+06	1.63716e+08
361.817	I63	164265451	11160797	1.70379e+06	5.43196e+06	2.20077e+07	0.360424	1.11634	0.191348	0.516835	0.989937	3.40997													361.817	I63	2.20077e+07	5.43196e+06	11160797	1.70379e+06	164265451
367.55	I64	165987151	1.10159e+07	1.63046e+06	3.70496e+06	2.24079e+07	0.341333	1.09042	0.129159	0.520775	0.997484	3.25239										Object	Integral [abs]	Integral [rel]	367.55	I64	2.24079e+07	3.70496e+06	1.10159e+07	1.63046e+06	165987151
373.267	I65	1.6717e+08	1.10155e+07	1.90053e+06	4.80143e+06	2.26672e+07	0.395056	1.08266	0.166198	0.523074	1.00189	3.37934										Integral 1	1.04717e+07	0.8794	373.267	I65	2.26672e+07	4.80143e+06	1.10155e+07	1.90053e+06	1.6717e+08
379	I66	1.6539e+08	1.1247e+07	2.55701e+06	3.95886e+06	2.22035e+07	0.537237	1.11731	0.138508	0.517887	0.991953	3.48522										Integral 2	1.22008e+07	1.0247	379	I66	2.22035e+07	3.95886e+06	1.1247e+07	2.55701e+06	1.6539e+08
384.75	I67	1.63289e+08	1.05327e+07	2.51254e+06	3.49981e+06	2.00818e+07	0.534688	1.05982	0.124023	0.474426	0.908709	3.26583										Integral 3	1.68828e+08	14.1785	384.75	I67	2.00818e+07	3.49981e+06	1.05327e+07	2.51254e+06	1.63289e+08
390.483	I68	1.64988e+08	1.13214e+07	2.58846e+06	4.22859e+06	2.0684e+07	0.545172	1.12745	0.148306	0.483623	0.926323	3.4201													390.483	I68	2.0684e+07	4.22859e+06	1.13214e+07	2.58846e+06	1.64988e+08
396.217	I69	1.64798e+08	1.1303e+07	2.9471e+06	4.3371e+06	1.97658e+07	0.621423	1.12691	0.152287	0.462686	0.886221	3.44096													396.217	I69	1.97658e+07	4.3371e+06	1.1303e+07	2.9471e+06	1.64798e+08
401.933	I70	1.64367e+08	1.14924e+07	2784039	3.88058e+06	2.10458e+07	0.588578	1.1488	0.136614	0.49394	0.946085	3.49243													401.933	I70	2.10458e+07	3.88058e+06	1.14924e+07	2784039	1.64367e+08
407.633	I71	1.6313e+08	1.26458e+07	3140783	3.958e+06	1.9599e+07	0.669034	1.27368	0.140397	0.463472	0.887728	3.61392													407.633	I71	1.9599e+07	3.958e+06	1.26458e+07	3140783	1.6313e+08
413.333	I72	1.6231e+08	1.07057e+07	3.19382e+06	3.63458e+06	2.09419e+07	0.68377	1.08372	0.129576	0.497731	0.953347	3.51984													413.333	I72	2.09419e+07	3.63458e+06	1.07057e+07	3.19382e+06	1.6231e+08
419.067	I73	1.63398e+08	1.25402e+07	2.9533e+06	4.05552e+06	1.96044e+07	0.628067	1.26097	0.14362	0.462841	0.886519	3.56481													419.067	I73	1.96044e+07	4.05552e+06	1.25402e+07	2.9533e+06	1.63398e+08
424.817	I74	1.63642e+08	1.21239e+07	3.27848e+06	3.77444e+06	2.06128e+07	0.696178	1.21729	0.133466	0.485919	0.930722	3.63816													424.817	I74	2.06128e+07	3.77444e+06	1.21239e+07	3.27848e+06	1.63642e+08
430.55	I75	163002182	1.14633e+07	2.92106e+06	4.10203e+06	1.80966e+07	0.622718	1.15548	0.14562	0.42828	0.820321	3.35428													430.55	I75	1.80966e+07	4.10203e+06	1.14633e+07	2.92106e+06	163002182
436.283	I76	1.62354e+08	12027410	3.03428e+06	3399851	19077809	0.649437	1.21719	0.121175	0.453303	0.86825	3.46888													436.283	I76	19077809	3399851	12027410	3.03428e+06	1.62354e+08
442.017	I77	1.61894e+08	1.2505e+07	3.79785e+06	2.98166e+06	1.91307e+07	0.815173	1.26911	0.106572	0.455851	0.87313	3.66498													442.017	I77	1.91307e+07	2.98166e+06	1.2505e+07	3.79785e+06	1.61894e+08
447.75	I78	1.61381e+08	1.26789e+07	2.56113e+06	3.7155e+06	1.80982e+07	0.551472	1.29086	0.133224	0.43262	0.828634	3.40664													447.75	I78	1.80982e+07	3.7155e+06	1.26789e+07	2.56113e+06	1.61381e+08
453.467	I79	1.62101e+08	1.1874e+07	3.40961e+06	3.79683e+06	1.91271e+07	0.730908	1.20353	0.135534	0.455183	0.871851	3.57106													453.467	I79	1.91271e+07	3.79683e+06	1.1874e+07	3.40961e+06	1.62101e+08
459.2	I80	1.62634e+08	1.34e+07	3.23626e+06	3.64238e+06	1.8549e+07	0.691475	1.35376	0.129595	0.439979	0.84273	3.62436													459.2	I80	1.8549e+07	3.64238e+06	1.34e+07	3.23626e+06	1.62634e+08
464.95	I81	1.61307e+08	1.30218e+07	3.32935e+06	3.4984e+06	1.80957e+07	0.717215	1.32637	0.125496	0.432758	0.828898	3.59285													464.95	I81	1.80957e+07	3.4984e+06	1.30218e+07	3.32935e+06	1.61307e+08
470.7	I82	1.61493e+08	1.3093e+07	3.05767e+06	2.93817e+06	1.71382e+07	0.657931	1.33209	0.105278	0.409387	0.784133	3.42873													470.7	I82	1.71382e+07	2.93817e+06	1.3093e+07	3.05767e+06	1.61493e+08
476.45	I83	1.6321e+08	1.32882e+07	2.47878e+06	2.41977e+06	1.80702e+07	0.527757	1.33773	0.0857908	0.427109	0.818078	3.31839													476.45	I83	1.80702e+07	2.41977e+06	1.32882e+07	2.47878e+06	1.6321e+08
482.2	I84	1.62816e+08	1.3979e+07	2.29661e+06	2.95853e+06	1.77702e+07	0.490155	1.41068	0.105146	0.421035	0.806444	3.37423													482.2	I84	1.77702e+07	2.95853e+06	1.3979e+07	2.29661e+06	1.62816e+08
487.967	I85	163169376	1.25975e+07	2.46514e+06	2.92644e+06	1.78158e+07	0.524985	1.26851	0.103781	0.421202	0.806763	3.26466													487.967	I85	1.78158e+07	2.92644e+06	1.25975e+07	2.46514e+06	163169376
493.733	I86	1.62626e+08	1.2416e+07	3.1841e+06	3.85454e+06	1.72296e+07	0.680361	1.25441	0.13715	0.408703	0.782823	3.43518													493.733	I86	1.72296e+07	3.85454e+06	1.2416e+07	3.1841e+06	1.62626e+08
499.5	I87	1.61744e+08	1.31269e+07	2.15785e+06	3.01235e+06	16101328	0.463592	1.33346	0.107768	0.384022	0.735549	3.16465													499.5	I87	16101328	3.01235e+06	1.31269e+07	2.15785e+06	1.61744e+08
505.25	I88	1.62874e+08	1.31937e+07	2.7919e+06	2.76216e+06	1.62925e+07	0.595651	1.33096	0.0981323	0.385885	0.739119	3.28053													505.25	I88	1.62925e+07	2.76216e+06	1.31937e+07	2.7919e+06	1.62874e+08
511	I89	1.63985e+08	1.31138e+07	2.68062e+06	2.32455e+06	1.55902e+07	0.568036	1.31394	0.0820258	0.366752	0.70247	3.14628													511	I89	1.55902e+07	2.32455e+06	1.31138e+07	2.68062e+06	1.63985e+08
516.767	I90	1.65101e+08	1.26403e+07	3.60456e+06	2.47283e+06	1.50737e+07	0.758656	1.25792	0.0866679	0.352203	0.674605	3.24652													516.767	I90	1.50737e+07	2.47283e+06	1.26403e+07	3.60456e+06	1.65101e+08
522.5	I91	1.63556e+08	12409191	3.72715e+06	3.68884e+06	1.60729e+07	0.79187	1.24659	0.130508	0.379097	0.726116	3.43677													522.5	I91	1.60729e+07	3.68884e+06	12409191	3.72715e+06	1.63556e+08
528.233	I92	1.6442e+08	1.21226e+07	2.61688e+06	3.099e+06	1.61417e+07	0.553059	1.2114	0.109064	0.378718	0.725391	3.11874													528.233	I92	1.61417e+07	3.099e+06	1.21226e+07	2.61688e+06	1.6442e+08
533.967	I93	1.6437e+08	1.31507e+07	2.63346e+06	3489820	1.40975e+07	0.556734	1.31454	0.122856	0.33086	0.633724	3.10957													533.967	I93	1.40975e+07	3489820	1.31507e+07	2.63346e+06	1.6437e+08
539.717	I94	1.64738e+08	1.19852e+07	4.04961e+06	3.03065e+06	1.33958e+07	0.854208	1.19536	0.106453	0.313689	0.600835	3.20354													539.717	I94	1.33958e+07	3.03065e+06	1.19852e+07	4.04961e+06	1.64738e+08
545.45	I95	1.66317e+08	1.25647e+07	3.57185e+06	3.62177e+06	1.23665e+07	0.746276	1.24126	0.126008	0.286835	0.5494	3.10006													545.45	I95	1.23665e+07	3.62177e+06	1.25647e+07	3.57185e+06	1.66317e+08
551.183	I96	1.67597e+08	1.16009e+07	3.1027e+06	2.42938e+06	1.45745e+07	0.643305	1.13729	0.0838769	0.335468	0.64255	2.95475													551.183	I96	1.45745e+07	2.42938e+06	1.16009e+07	3.1027e+06	1.67597e+08
556.9	I97	1.67627e+08	1.1804e+07	4.02527e+06	3.4753e+06	1.34529e+07	0.834437	1.15699	0.119967	0.309594	0.592992	3.16015													556.9	I97	1.34529e+07	3.4753e+06	1.1804e+07	4.02527e+06	1.67627e+08
562.633	I98	1.67623e+08	1.18009e+07	3.31528e+06	3.03078e+06	1.37682e+07	0.687272	1.15672	0.104625	0.316858	0.606906	3.00382													562.633	I98	1.37682e+07	3.03078e+06	1.18009e+07	3.31528e+06	1.67623e+08
568.367	I99	1.69152e+08	1.07456e+07	3.07198e+06	3.99587e+06	1.44536e+07	0.631082	1.04377	0.136694	0.329628	0.631364	2.93712													568.367	I99	1.44536e+07	3.99587e+06	1.07456e+07	3.07198e+06	1.69152e+08
574.083	I100	1.68317e+08	1.11069e+07	4.18554e+06	2.23021e+06	1.25822e+07	0.864105	1.0842	0.076671	0.288371	0.552342	2.96676													574.083	I100	1.25822e+07	2.23021e+06	1.11069e+07	4.18554e+06	1.68317e+08
579.8	I101	1.6798e+08	1.00303e+07	4.04502e+06	3.07965e+06	1.31697e+07	0.836771	0.981075	0.106086	0.302442	0.579292	2.93734													579.8	I101	1.31697e+07	3.07965e+06	1.00303e+07	4.04502e+06	1.6798e+08
585.517	I102	1.68332e+08	1.01762e+07	4.04367e+06	1.83912e+06	1.18346e+07	0.834742	0.993271	0.0632206	0.271213	0.519478	2.76809													585.517	I102	1.18346e+07	1.83912e+06	1.01762e+07	4.04367e+06	1.68332e+08
591.233	I103	1.68408e+08	1.08389e+07	3.91661e+06	1.94544e+06	13134995	0.80815	1.05748	0.0668452	0.300879	0.576298	2.90196													591.233	I103	13134995	1.94544e+06	1.08389e+07	3.91661e+06	1.68408e+08
596.967	I104	1.67703e+08	1.09725e+07	3.35915e+06	2.29278e+06	1.23533e+07	0.69604	1.07501	0.0791111	0.284162	0.54428	2.78176													596.967	I104	1.23533e+07	2.29278e+06	1.09725e+07	3.35915e+06	1.67703e+08
602.667	I105	1.67486e+08	10291062	3.99084e+06	1.92978e+06	1.20385e+07	0.827998	1.00955	0.066672	0.277279	0.531097	2.80273													602.667	I105	1.20385e+07	1.92978e+06	10291062	3.99084e+06	1.67486e+08
608.417	I106	1.68634e+08	10633526	2.56623e+06	1.43153e+06	1.22682e+07	0.528803	1.03605	0.0491211	0.280645	0.537544	2.50503													608.417	I106	1.22682e+07	1.43153e+06	10633526	2.56623e+06	1.68634e+08
614.133	I107	1.68953e+08	9.62623e+06	3.46191e+06	1.81558e+06	1.14362e+07	0.712023	0.936135	0.0621819	0.26112	0.500146	2.55588													614.133	I107	1.14362e+07	1.81558e+06	9.62623e+06	3.46191e+06	1.68953e+08
619.85	I108	167515676	10494695	3.81577e+06	2.79697e+06	1.20522e+07	0.791536	1.02935	0.0966155	0.277546	0.531607	2.84675													619.85	I108	1.20522e+07	2.79697e+06	10494695	3.81577e+06	167515676
625.6	I109	1.66821e+08	9.39611e+06	3.74304e+06	3.02367e+06	1.17942e+07	0.779679	0.925431	0.104881	0.272734	0.52239	2.73307													625.6	I109	1.17942e+07	3.02367e+06	9.39611e+06	3.74304e+06	1.66821e+08
631.317	I110	1.67526e+08	8.82409e+06	3.76349e+06	2.02107e+06	1.03815e+07	0.780645	0.86544	0.0698095	0.239058	0.457889	2.50288													631.317	I110	1.03815e+07	2.02107e+06	8.82409e+06	3.76349e+06	1.67526e+08
637.033	I111	1.67266e+08	8.93698e+06	4.05092e+06	3.15981e+06	1.03027e+07	0.841567	0.877871	0.109312	0.237611	0.455117	2.6509													637.033	I111	1.03027e+07	3.15981e+06	8.93698e+06	4.05092e+06	1.67266e+08
642.767	I112	1.67625e+08	9.00922e+06	3.73085e+06	2.30507e+06	1.10927e+07	0.773418	0.883074	0.0795721	0.255284	0.488967	2.58149													642.767	I112	1.10927e+07	2.30507e+06	9.00922e+06	3.73085e+06	1.67625e+08
648.483	I113	1.66764e+08	8.72422e+06	4.33525e+06	2.3855e+06	9.23675e+06	0.903349	0.859553	0.0827736	0.213669	0.409257	2.56945													648.483	I113	9.23675e+06	2.3855e+06	8.72422e+06	4.33525e+06	1.66764e+08
654.217	I114	1.66965e+08	8.66743e+06	4.04162e+06	1.21154e+06	9.8425e+06	0.841149	0.852926	0.0419881	0.227406	0.43557	2.46027													654.217	I114	9.8425e+06	1.21154e+06	8.66743e+06	4.04162e+06	1.66965e+08
659.933	I115	1.6881e+08	8.86624e+06	3448044	1.46964e+06	1.00732e+07	0.70977	0.862956	0.0503765	0.230194	0.44091	2.36406													659.933	I115	1.00732e+07	1.46964e+06	8.86624e+06	3448044	1.6881e+08
665.633	I116	1.67734e+08	7.37576e+06	4.91659e+06	1.69769e+06	8.70147e+06	1.01856	0.722491	0.0585669	0.200122	0.38331	2.45855													665.633	I116	8.70147e+06	1.69769e+06	7.37576e+06	4.91659e+06	1.67734e+08
671.333	I117	1.66898e+08	8.2156e+06	3.39814e+06	1.33849e+06	8.59206e+06	0.707512	0.808791	0.0464064	0.198596	0.380387	2.2049													671.333	I117	8.59206e+06	1.33849e+06	8.2156e+06	3.39814e+06	1.66898e+08
677.05	I118	1.67432e+08	8.27741e+06	3.19152e+06	2.93761e+06	9.44551e+06	0.662373	0.812277	0.101524	0.217626	0.416837	2.33058													677.05	I118	9.44551e+06	2.93761e+06	8.27741e+06	3.19152e+06	1.67432e+08
682.783	I119	1.68982e+08	8.67488e+06	4.45635e+06	2.3087e+06	9.12505e+06	0.916395	0.843472	0.0790571	0.208314	0.399001	2.54292													682.783	I119	9.12505e+06	2.3087e+06	8.67488e+06	4.45635e+06	1.68982e+08
688.5	I120	1.69916e+08	8.06723e+06	3140228	2.35624e+06	8.11397e+06	0.642201	0.780079	0.0802417	0.184214	0.352841	2.13541													688.5	I120	8.11397e+06	2.35624e+06	8.06723e+06	3140228	1.69916e+08
694.217	I121	1.7098e+08	7807003	3.87904e+06	1.90073e+06	9.33887e+06	0.788355	0.750217	0.0643265	0.210704	0.403579	2.29934													694.217	I121	9.33887e+06	1.90073e+06	7807003	3.87904e+06	1.7098e+08
699.95	I122	1.69692e+08	8.86321e+06	3.5042e+06	1.57023e+06	8.74945e+06	0.717582	0.858178	0.0535446	0.198904	0.380977	2.27956													699.95	I122	8.74945e+06	1.57023e+06	8.86321e+06	3.5042e+06	1.69692e+08
705.7	I123	1.71761e+08	8.29833e+06	4.7526e+06	2.57871e+06	7.89611e+06	0.961501	0.793805	0.0868745	0.177342	0.339678	2.46108													705.7	I123	7.89611e+06	2.57871e+06	8.29833e+06	4.7526e+06	1.71761e+08
711.417	I124	1.71522e+08	8.00979e+06	2.95697e+06	2.28838e+06	8.69009e+06	0.599062	0.767273	0.0772013	0.195447	0.374356	2.10708													711.417	I124	8.69009e+06	2.28838e+06	8.00979e+06	2.95697e+06	1.71522e+08
717.133	I125	1.74128e+08	8.35637e+06	4.70142e+06	1.90243e+06	6.76961e+06	0.938222	0.788493	0.06322	0.149975	0.28726	2.30308													717.133	I125	6.76961e+06	1.90243e+06	8.35637e+06	4.70142e+06	1.74128e+08
722.85	I126	1.73781e+08	7.94472e+06	3585293	2.27362e+06	8.29401e+06	0.716914	0.751147	0.075706	0.184114	0.352649	2.17181													722.85	I126	8.29401e+06	2.27362e+06	7.94472e+06	3585293	1.73781e+08
728.567	I127	1.75311e+08	8.20686e+06	3.98883e+06	2.20665e+06	9.05399e+06	0.790642	0.769159	0.0728348	0.19923	0.381601	2.30316													728.567	I127	9.05399e+06	2.20665e+06	8.20686e+06	3.98883e+06	1.75311e+08
734.3	I128	1.72236e+08	8.10199e+06	3.88577e+06	2.03317e+06	7.89404e+06	0.783964	0.772884	0.0683067	0.176806	0.338652	2.22388													734.3	I128	7.89404e+06	2.03317e+06	8.10199e+06	3.88577e+06	1.72236e+08
740.033	I129	1.73719e+08	7.45789e+06	3.87716e+06	2974516	6.9347e+06	0.775551	0.705368	0.0990794	0.153994	0.294957	2.14106													740.033	I129	6.9347e+06	2974516	7.45789e+06	3.87716e+06	1.73719e+08
745.767	I130	175405746	7.53816e+06	4.33111e+06	2.54831e+06	7.43695e+06	0.858023	0.706105	0.0840664	0.163559	0.313278	2.22294													745.767	I130	7.43695e+06	2.54831e+06	7.53816e+06	4.33111e+06	175405746
751.483	I131	179897551	7.84145e+06	4.41472e+06	843729	6.65136e+06	0.85275	0.716175	0.0271389	0.142629	0.27319	2.05109													751.483	I131	6.65136e+06	843729	7.84145e+06	4.41472e+06	179897551
757.2	I132	1.75634e+08	7.61127e+06	2.81258e+06	1.69868e+06	7890764	0.556468	0.712028	0.0559653	0.173314	0.331963	1.90037													757.2	I132	7890764	1.69868e+06	7.61127e+06	2.81258e+06	1.75634e+08
762.9	I133	175679204	7.56923e+06	4.50019e+06	1.04723e+06	6362735	0.890131	0.707912	0.0344935	0.139716	0.26761	2.08618													762.9	I133	6362735	1.04723e+06	7.56923e+06	4.50019e+06	175679204
768.65	I134	1.77344e+08	7.42919e+06	4648454	803030	6.52785e+06	0.910829	0.688294	0.0262018	0.141997	0.271978	2.07752													768.65	I134	6.52785e+06	803030	7.42919e+06	4648454	1.77344e+08
774.35	I135	1.78963e+08	7.26257e+06	4.04444e+06	1.90802e+06	6.61365e+06																			774.35	I135	6.61365e+06	1.90802e+06	7.26257e+06	4.04444e+06	1.78963e+08
780.067	I136	1.80532e+08	7330374	5.00544e+06	1.0235e+06	5660305																			780.067	I136	5660305	1.0235e+06	7330374	5.00544e+06	1.80532e+08
785.8	I137	1.82958e+08	7.69596e+06	4.96302e+06	1.90202e+06	5.58281e+06																			785.8	I137	5.58281e+06	1.90202e+06	7.69596e+06	4.96302e+06	1.82958e+08
791.533	I138	181210203	6995552	4.66265e+06	1.78701e+06	5.98507e+06																			791.533	I138	5.98507e+06	1.78701e+06	6995552	4.66265e+06	181210203
797.233	I139	1.7985e+08	6.67789e+06	4.29789e+06	1.22888e+06	6.39289e+06																			797.233	I139	6.39289e+06	1.22888e+06	6.67789e+06	4.29789e+06	1.7985e+08
802.95	I140	1.81301e+08	8656648	4.54775e+06	1183211	6.53011e+06																			802.95	I140	6.53011e+06	1183211	8656648	4.54775e+06	1.81301e+08
808.683	I141	1.82185e+08	6.75197e+06	3.89861e+06	1986602	7.36915e+06																			808.683	I141	7.36915e+06	1986602	6.75197e+06	3.89861e+06	1.82185e+08
814.4	I142	1.83427e+08	7.4352e+06	4.66751e+06	1.18871e+06	8.28851e+06																			814.4	I142	8.28851e+06	1.18871e+06	7.4352e+06	4.66751e+06	1.83427e+08
820.133	I143	1.84315e+08	8081083	3.44902e+06	2.23146e+06	5.46197e+06																			820.133	I143	5.46197e+06	2.23146e+06	8081083	3.44902e+06	1.84315e+08
825.867	I144	1.82868e+08	7.75314e+06	3.84038e+06	2.45168e+06	6.83424e+06																			825.867	I144	6.83424e+06	2.45168e+06	7.75314e+06	3.84038e+06	1.82868e+08
831.6	I145	182714347	8.45662e+06	5.16777e+06	1220247	5700902																			831.6	I145	5700902	1220247	8.45662e+06	5.16777e+06	182714347
837.317	I146	1.84337e+08	6.71878e+06	4.46696e+06	657725	5.56438e+06																			837.317	I146	5.56438e+06	657725	6.71878e+06	4.46696e+06	1.84337e+08
843.017	I147	1.84709e+08	7.45908e+06	3.5867e+06	2.02174e+06	6360490																			843.017	I147	6360490	2.02174e+06	7.45908e+06	3.5867e+06	1.84709e+08
848.75	I148	1.84037e+08	6.90311e+06	4.3721e+06	3.16418e+06	5.09207e+06																			848.75	I148	5.09207e+06	3.16418e+06	6.90311e+06	4.3721e+06	1.84037e+08
854.483	I149	1.85406e+08	7.75562e+06	4.09956e+06	1.74984e+06	4.95081e+06																			854.483	I149	4.95081e+06	1.74984e+06	7.75562e+06	4.09956e+06	1.85406e+08
860.217	I150	1.84876e+08	7.65491e+06	4265112	935051	5.31252e+06																			860.217	I150	5.31252e+06	935051	7.65491e+06	4265112	1.84876e+08
865.933	I151	1.85559e+08	6.84661e+06	4.62587e+06	1.61426e+06	6.0321e+06																			865.933	I151	6.0321e+06	1.61426e+06	6.84661e+06	4.62587e+06	1.85559e+08
871.667	I152	1.84077e+08	7.09951e+06	3.68735e+06	2.94475e+06	5.68528e+06																			871.667	I152	5.68528e+06	2.94475e+06	7.09951e+06	3.68735e+06	1.84077e+08
877.367	I153	1.8375e+08	6.40706e+06	4269644	729622	4.58262e+06																			877.367	I153	4.58262e+06	729622	6.40706e+06	4269644	1.8375e+08
883.1	I154	1.81473e+08	7.05594e+06	4.44567e+06	1.37727e+06	5.13507e+06																			883.1	I154	5.13507e+06	1.37727e+06	7.05594e+06	4.44567e+06	1.81473e+08
888.8	I155	1.82394e+08	6.35753e+06	4419918	1129938	5.06655e+06																			888.8	I155	5.06655e+06	1129938	6.35753e+06	4419918	1.82394e+08
894.517	I156	1.82248e+08	8.11245e+06	4.29887e+06	680935	4358119																			894.517	I156	4358119	680935	8.11245e+06	4.29887e+06	1.82248e+08
900.267	I157	1.81948e+08	6.95956e+06	5.84258e+06	1.55146e+06	3.90559e+06																			900.267	I157	3.90559e+06	1.55146e+06	6.95956e+06	5.84258e+06	1.81948e+08
906	I158	1.81494e+08	7.29205e+06	4.20912e+06	1.93421e+06	5.53832e+06																			906	I158	5.53832e+06	1.93421e+06	7.29205e+06	4.20912e+06	1.81494e+08
911.717	I159	180208807	7.12685e+06	5.42081e+06	1.84469e+06	5.5325e+06																			911.717	I159	5.5325e+06	1.84469e+06	7.12685e+06	5.42081e+06	180208807
917.417	I160	1.78755e+08	6.19449e+06	5.84866e+06	775790	5.15424e+06																			917.417	I160	5.15424e+06	775790	6.19449e+06	5.84866e+06	1.78755e+08
923.15	I161	180565992	6.45619e+06	5.52156e+06	1.27272e+06	3.7572e+06																			923.15	I161	3.7572e+06	1.27272e+06	6.45619e+06	5.52156e+06	180565992
928.9	I162	1.79301e+08	8.10857e+06	3.95324e+06	2.37805e+06	4.83927e+06																			928.9	I162	4.83927e+06	2.37805e+06	8.10857e+06	3.95324e+06	1.79301e+08
934.65	I163	177093643	6.43047e+06	5.40442e+06	172988	4.42006e+06																			934.65	I163	4.42006e+06	172988	6.43047e+06	5.40442e+06	177093643
940.4	I164	177336146	6.57937e+06	5.12934e+06	1.44819e+06	4929817																			940.4	I164	4929817	1.44819e+06	6.57937e+06	5.12934e+06	177336146
946.15	I165	1.7699e+08	6.46556e+06	5.74169e+06	984804	3.72288e+06																			946.15	I165	3.72288e+06	984804	6.46556e+06	5.74169e+06	1.7699e+08
951.867	I166	1.74023e+08	6.92826e+06	5.70872e+06	467188	3.78336e+06																			951.867	I166	3.78336e+06	467188	6.92826e+06	5.70872e+06	1.74023e+08
957.6	I167	1.72112e+08	5.78166e+06	5.0909e+06	967043	3.94056e+06																			957.6	I167	3.94056e+06	967043	5.78166e+06	5.0909e+06	1.72112e+08
963.317	I168	173957633	7.39212e+06	4.01739e+06	2.48651e+06	4.51671e+06																			963.317	I168	4.51671e+06	2.48651e+06	7.39212e+06	4.01739e+06	173957633
969.033	I169	1.72164e+08	6.63401e+06	5.28517e+06	1.08798e+06	3.48533e+06																			969.033	I169	3.48533e+06	1.08798e+06	6.63401e+06	5.28517e+06	1.72164e+08
974.733	I170	1.72834e+08	5.99087e+06	6.15832e+06	-243088	4055561																			974.733	I170	4055561	-243088	5.99087e+06	6.15832e+06	1.72834e+08
980.45	I171	1.70698e+08	6.18663e+06	4.63946e+06	1.50039e+06	4.7488e+06																			980.45	I171	4.7488e+06	1.50039e+06	6.18663e+06	4.63946e+06	1.70698e+08
986.183	I172	1.69448e+08	7.00288e+06	4.7701e+06	-352503	4.47582e+06																			986.183	I172	4.47582e+06	-352503	7.00288e+06	4.7701e+06	1.69448e+08
991.917	I173	1.67563e+08	7.19782e+06	5.23132e+06	711937	4.50587e+06																			991.917	I173	4.50587e+06	711937	7.19782e+06	5.23132e+06	1.67563e+08
997.65	I174	1.67535e+08	6.95445e+06	3.69868e+06	2.42554e+06	4.14581e+06																			997.65	I174	4.14581e+06	2.42554e+06	6.95445e+06	3.69868e+06	1.67535e+08
1003.4	I175	1.67494e+08	7.09435e+06	6.06457e+06	1.65435e+06	3.72287e+06																			1003.4	I175	3.72287e+06	1.65435e+06	7.09435e+06	6.06457e+06	1.67494e+08
1009.13	I176	1.68691e+08	5.887e+06	6.06186e+06	463378	4.17985e+06																			1009.13	I176	4.17985e+06	463378	5.887e+06	6.06186e+06	1.68691e+08
1014.83	I177	1.66449e+08	6.26638e+06	6.22966e+06	782455	3.59308e+06																			1014.83	I177	3.59308e+06	782455	6.26638e+06	6.22966e+06	1.66449e+08
1020.58	I178	167907802	7.15447e+06	5.0542e+06	537466	4.1186e+06																			1020.58	I178	4.1186e+06	537466	7.15447e+06	5.0542e+06	167907802
