# Supplementary material for: Mapping catalyst activation, turnover speciation and deactivation in Rh/PPh3-catalysed olefin hydroformylation
Source: Royal Society of Chemistry journal article supplement (doi:10.1039/d2cy00312k), 2022-01-01
Supplement: d2cy00312k6.xlsx [file d2cy00312k6.xlsx]

## Sheet: Proton
time [min]:	Peak name	1-hexene #1	1-heptanal #1	2-methylhexanal #1	Hydrogen #2	TMB aromatic #3	TMB methyl #9	1-hexene (other H double bond)	[1-hexene]	[1-heptanal]	[2-methylhexanal]	[Hydrogen]	[TMB aromatic]	[TMB methyl]	[1-hexene (other H double bond)]	Conversion	Regioselectivity n-heptanal	Regioselectivity 2-methylhexanal	PPh3/Rh= 10																						time [min]:	Peak name	1	2	3	4	5	6	7
0.0166667	I0	4.63892e+07	24519.8	3536	10454.2	5.25109e+07	207106760	1.05181e+08	485.847	0.304945	0.0405789	0.0115193	115.995	94.7589	502.389	0	88.2558	11.7442	7.51487		INTERNAL REFERENCE			FLOW CALIBRATION																	0.0166667	I0	24519.8	3536	5.25109e+07	4.63892e+07	-116397	1.05181e+08	10454.2
7.56667	I1	4.854e+07	24323.2	5164.75	-2068.25	5.62307e+07	215789865	110482486	487.916	0.290329	0.0568854	-0.00218725	119.214	94.7589	506.476	-0.425871	83.6166	16.3834	5.10376		1-hexene Volume (mL)	1.3			1-hexene (initial)	1-hexene (end)	1-heptanal (end)	2-methylhexanal (end)	Hydrogen (end)	TMB aromatic (initial)	TMB methyl (initial)	TMB aromatic (end)	TMB methyl (end)	1-hexene (other H double bond)							7.56667	I1	24323.2	5164.75	5.62307e+07	4.854e+07	-5277.75	110482486	-2068.25
14.0167	I2	5.33458e+07	84617	23923	8.60618e+06	60057830	221961779	121039373	521.313	0.981928	0.256165	8.84827	123.787	94.7589	539.443	-7.2999	79.3097	20.6903	3.83318		1-hexene n (moles)	0.0104729		0 mL/min	29142933	4176547	20157390	6.62235e+06	1074285	2.00388e+07	62136918	20500117	6.30756e+07	6.17893e+06							14.0167	I2	84617	23923	60057830	5.33458e+07	19407	121039373	8.60618e+06
20.4333	I3	5.33463e+07	387316	128994	8874316	6.01448e+07	221701982	120951597	521.928	4.49983	1.38287	9.13464	124.111	94.7589	539.683	-7.42655	76.4925	23.5075	3.25397		Reaction Volume (L)	0.0224		4 mL/min	6.75363e+06	987741	4.8867e+06	1.7202e+06	1.58738e+06	7.57361e+06	3.6012e+07	8.49335e+06	3.78577e+07	1.62179e+06							20.4333	I3	387316	128994	6.01448e+07	5.33463e+07	2853	120951597	8874316
26.8667	I4	5.53346e+07	975138	328586	8643530	6.23162e+07	2.2506e+08	1.24931e+08	533.304	11.1601	3.47003	8.76434	126.674	94.7589	549.124	-9.76802	76.2816	23.7184	3.21614		1-hexene (M)	0.467541		CF	4.31515	4.22838	4.12495	3.84975	0.676765	2.64587	1.72545	2.41367	1.66612	3.80995							26.8667	I4	975138	328586	6.23162e+07	5.53346e+07	16362.5	1.24931e+08	8643530
33.2667	I5	5.72771e+07	1.78947e+06	582398	8.47415e+06	64323720	227519664	1.28718e+08	546.057	20.2585	6.08392	8.49969	129.341	94.7589	559.652	-12.3929	76.9045	23.0955	3.32984		1-hexene(mM)	467.541																			33.2667	I5	1.78947e+06	582398	64323720	5.72771e+07	27185.5	1.28718e+08	8.47415e+06
39.65	I6	5.74245e+07	2809071	915073	9472342	65133736	228090656	1.28936e+08	546.093	31.7216	9.53522	9.47712	130.642	94.7589	559.196	-12.4002	76.8881	23.1119	3.32678																						39.65	I6	2809071	915073	65133736	5.74245e+07	83472.5	1.28936e+08	9472342
46.05	I7	56447388	4.10285e+06	1.3346e+06	9219479	65628697	2.28474e+08	126410223	535.9	46.254	13.8834	9.20864	131.414	94.7589	547.321	-10.3022	76.9139	23.0861	3.3316		# is the number of protons of the peak taken for integration			0 mL	static with long delay (flow+ full relaxtion effects)	2.98873e+06	2.21134e+07	7.21829e+06	1.81406e+06			2.06713e+07	6.2014e+07	6.23515e+06							46.05	I7	4.10285e+06	1.3346e+06	65628697	56447388	111005	126410223	9219479
52.4667	I8	5.53439e+07	5464359	1789219	9.16135e+06	66116410	229241575	1.23974e+08	523.665	61.3968	18.5504	9.11995	131.947	94.7589	534.974	-7.78394	76.7967	23.2033	3.30974		If #>1 the integration will be divided by the number of protons			4 mL	flow with shot delay (flow + poor relaxiation)	1.71889e+06	1.31871e+07	4.54702e+06	2.39944e+06			1.82401e+07	7.37824e+07	3.96139e+06							52.4667	I8	5464359	1789219	66116410	5.53439e+07	163674	1.23974e+08	9.16135e+06
58.8667	I9	5.53098e+07	7067544	2.32138e+06	9022583	66857329	2.29101e+08	123562753	523.663	79.4588	24.0826	8.98732	133.507	94.7589	533.528	-7.7835	76.7411	23.2589	3.29943							1.73875	1.6769	1.58748	0.756035	#DIV/0!	#DIV/0!	1.13328	0.840499	1.57398		from this reaction. Weird correction factors.					58.8667	I9	7067544	2.32138e+06	66857329	5.53098e+07	149630	123562753	9022583
66.05	I10	58712092	9.52244e+06	3070712	8906888	6.82243e+07	229712948	1.28717e+08	554.394	106.773	31.7714	8.84844	135.874	94.7589	554.305	-14.1089	77.0678	22.9322	3.36068						initial CF were calculated under Argon ( the reactor was still no pressurized)																66.05	I10	9.52244e+06	3070712	6.82243e+07	58712092	159344	1.28717e+08	8906888
72.4833	I11	5.28894e+07	10529259	3.42175e+06	8757285	6.7777e+07	2.3046e+08	117676115	497.796	117.68	35.2888	8.67164	134.546	94.7589	505.115	-2.45937	76.9308	23.0692	3.33477		INTERNAL REFERENCE STANDARD				final CF were calculated under 10 bar H2/CO ( reactor pressurized)																72.4833	I11	10529259	3.42175e+06	6.7777e+07	5.28894e+07	187192	117676115	8757285
78.9	I12	5.07878e+07	12009503	3.90945e+06	8599668	67456066	229805161	113094202	479.376	134.606	40.4333	8.53981	134.29	94.7589	486.83	1.33188	76.9005	23.0995	3.3291		Mass of TMB (g)	0.357																			78.9	I12	12009503	3.90945e+06	67456066	5.07878e+07	211546	113094202	8599668
85.3333	I13	4.89221e+07	13656769	4458531	8499802	67615682	230622946	108968554	460.128	152.527	45.9486	8.41071	134.131	94.7589	467.407	5.29353	76.8492	23.1508	3.31951		Molecular weight of TMB (g/mol)	168.19																			85.3333	I13	13656769	4458531	67615682	4.89221e+07	252721	108968554	8499802
91.7833	I14	4.77474e+07	15226434	4.97446e+06	8.2316e+06	6.78803e+07	2.3073e+08	1.05993e+08	448.871	169.978	51.2417	8.14153	134.593	94.7589	454.433	7.61057	76.8368	23.1632	3.31719		Moles of TMB (n)	0.0021226			CF calculated in ABE-012-01 using D1=60																91.7833	I14	15226434	4.97446e+06	6.78803e+07	4.77474e+07	224201	1.05993e+08	8.2316e+06
98.1833	I15	4.56387e+07	1.67476e+07	5.44621e+06	8.04314e+06	67714926	2.30685e+08	101345821	429.132	186.997	56.1124	7.95671	134.292	94.7589	434.594	11.6733	76.9189	23.0811	3.33255		Reaction Volume (L)	0.0224																			98.1833	I15	1.67476e+07	5.44621e+06	67714926	4.56387e+07	208736	101345821	8.04314e+06
104.6	I16	44641491	1.84657e+07	6039487	7948532	6.82518e+07	2.31286e+08	98764267	418.665	205.645	62.0632	7.84268	135.005	94.7589	422.423	13.8278	76.8168	23.1832	3.31347		TMB (M)	0.0947589																			104.6	I16	1.84657e+07	6039487	6.82518e+07	44641491	237850	98764267	7948532
111.083	I17	43012742	19720656	6477737	7670168	68143720	2.31116e+08	9.52789e+07	403.685	219.781	66.6155	7.57357	134.89	94.7589	407.815	16.911	76.7401	23.2599	3.29925		TMB (mM)	94.7589		FLOW CALIBRATION																	111.083	I17	19720656	6477737	68143720	43012742	293636	9.52789e+07	7670168
117.517	I18	41922958	2.1139e+07	7022187	7532849	68339963	230948006	9.28541e+07	393.744	235.76	72.2671	7.4434	135.377	94.7589	397.726	18.9571	76.5387	23.4613	3.26234						1-hexene (initial)	1-hexene (end)	1-heptanal (end)	2-methylhexanal (end)	Hydrogen (end)	TMB aromatic (initial)	TMB methyl (initial)	TMB aromatic (end)	TMB methyl (end)	1-hexene (other H double bond)							117.517	I18	2.1139e+07	7022187	68339963	41922958	253052	9.28541e+07	7532849
123.933	I19	3.95624e+07	22129227	7.33582e+06	7.49458e+06	68092227	231412156	87815870	370.829	246.309	75.3433	7.39074	134.615	94.7589	375.391	23.6738	76.5762	23.4238	3.26915					0 mL/min	2.78016e+07	7.53593e+06	1.87317e+07	5722346	4.41821e+06	2.16925e+07	6.43757e+07	2.16584e+07	6.12478e+07	1.44223e+07							123.933	I19	22129227	7.33582e+06	68092227	3.95624e+07	291259	87815870	7.49458e+06
131.05	I20	4.25652e+07	26833494	8.53055e+06	7.49967e+06	69655462	2.31444e+08	92137987	398.921	298.629	87.6021	7.39475	137.687	94.7589	393.813	17.8917	77.3187	22.6813	3.40893					4 mL/min	6.11977e+06	1757276	3.67838e+06	1.21779e+06	3.89945e+06	7.34342e+06	3.6664e+07	7.98182e+06	3.63252e+07	3.68713e+06							131.05	I20	26833494	8.53055e+06	69655462	4.25652e+07	309003	92137987	7.49967e+06
137.5	I21	2.78652e+07	2.18582e+07	6.9708e+06	8392332	61309027	2.25061e+08	6.35599e+07	268.559	250.158	73.6148	8.50959	124.626	94.7589	279.37	44.7236	77.2635	22.7365	3.39821					CF	4.54292	4.28842	5.09238	4.69897	1.13304	2.954	1.75583	2.71347	1.6861	3.91153							137.5	I21	2.18582e+07	6.9708e+06	61309027	2.78652e+07	276304	6.35599e+07	8392332
143.9	I22	26646256	22546204	7.18949e+06	8.1629e+06	6.11114e+07	2.24945e+08	6.06501e+07	256.943	258.165	75.9634	8.28122	124.288	94.7589	266.718	47.1144	77.2652	22.7348	3.39854																						143.9	I22	22546204	7.18949e+06	6.11114e+07	26646256	227446	6.06501e+07	8.1629e+06
150.35	I23	2.50167e+07	2.30707e+07	7.40271e+06	7.99818e+06	6.02262e+07	2.23382e+08	5.7112e+07	242.917	266.019	78.7634	8.17088	123.345	94.7589	252.916	50.0014	77.1556	22.8444	3.37744																						150.35	I23	2.30707e+07	7.40271e+06	6.02262e+07	2.50167e+07	288049	5.7112e+07	7.99818e+06
156.783	I24	2.37991e+07	2.37609e+07	7.58262e+06	8.06861e+06	6.00733e+07	2.23483e+08	54469606	230.99	273.854	80.6413	8.23912	122.976	94.7589	241.105	52.4563	77.2518	22.7482	3.39595										Value taken from ABE-013-01												156.783	I24	2.37609e+07	7.58262e+06	6.00733e+07	2.37991e+07	271139	54469606	8.06861e+06
163.2	I25	2.28853e+07	2.45932e+07	7.81075e+06	7.86732e+06	60095987	223708111	5.24564e+07	221.897	283.162	82.9839	8.02549	122.899	94.7589	231.96	54.3278	77.3358	22.6642	3.41225																						163.2	I25	2.45932e+07	7.81075e+06	60095987	2.28853e+07	300872	5.24564e+07	7.86732e+06
169.6	I26	2.19886e+07	2.53497e+07	8.02649e+06	7811631	6.0127e+07	2.24098e+08	5.03973e+07	212.832	291.364	85.1277	7.95483	122.748	94.7589	222.468	56.1936	77.3892	22.6108	3.42267																						169.6	I26	2.53497e+07	8.02649e+06	6.0127e+07	2.19886e+07	238939	5.03973e+07	7811631
176.017	I27	2.14673e+07	26255417	8.3426e+06	7.80025e+06	6.04418e+07	2.24572e+08	4.90379e+07	207.347	301.136	88.2934	7.92645	123.13	94.7589	216.009	57.3226	77.3275	22.6725	3.41063																						176.017	I27	26255417	8.3426e+06	6.04418e+07	2.14673e+07	275332	4.90379e+07	7.80025e+06
182.433	I28	20859723	2.73071e+07	8585840	7807820	61034884	2.2547e+08	47673288	200.677	311.952	90.5059	7.90256	123.844	94.7589	209.162	58.6955	77.5117	22.4883	3.44676																						182.433	I28	2.73071e+07	8585840	61034884	20859723	338964	47673288	7807820
188.85	I29	1.9824e+07	2.78209e+07	8804120	7628907	6.08824e+07	2.25733e+08	4.52759e+07	190.49	317.451	92.6986	7.71246	123.39	94.7589	198.412	60.7922	77.3988	22.6012	3.42455																						188.85	I29	2.78209e+07	8804120	6.08824e+07	1.9824e+07	306694	4.52759e+07	7628907
196	I30	2.0422e+07	3.05772e+07	9.66229e+06	7.53547e+06	61796710	2.25558e+08	46093763	196.389	349.173	101.813	7.62393	125.34	94.7589	202.153	59.5781	77.4243	22.5757	3.42954																						196	I30	3.05772e+07	9.66229e+06	61796710	2.0422e+07	334538	46093763	7.53547e+06
202.417	I31	1.84388e+07	2.97463e+07	9352538	7644380	6.13725e+07	2.25997e+08	42155298	176.974	339.025	98.3581	7.7191	124.238	94.7589	184.522	63.5742	77.5121	22.4879	3.44684																						202.417	I31	2.97463e+07	9352538	6.13725e+07	1.84388e+07	356638	42155298	7644380
208.85	I32	1.7737e+07	30441240	9562397	7487879	61505493	226269135	40586408	170.033	346.527	100.444	7.55196	124.358	94.7589	177.44	65.0028	77.5278	22.4722	3.44995																						208.85	I32	30441240	9562397	61505493	1.7737e+07	311821	40586408	7487879
215.267	I33	1.7193e+07	3.119e+07	9.77901e+06	7.4196e+06	6.15744e+07	2.26061e+08	39162750	164.969	355.378	102.814	7.49	124.612	94.7589	171.374	66.045	77.5609	22.4391	3.45651																						215.267	I33	3.119e+07	9.77901e+06	6.15744e+07	1.7193e+07	328340	39162750	7.4196e+06
221.667	I34	1.64311e+07	3.1877e+07	9999931	7.43779e+06	61930914	227351684	37545070	156.763	361.143	104.54	7.46573	124.621	94.7589	163.362	67.734	77.5513	22.4487	3.4546																						221.667	I34	3.1877e+07	9999931	61930914	1.64311e+07	335139	37545070	7.43779e+06
228.067	I35	15844151	3.2518e+07	10214902	7.33843e+06	6.2035e+07	2.27098e+08	3.61879e+07	151.333	368.818	106.906	7.37423	124.97	94.7589	157.633	68.8518	77.5276	22.4724	3.44991																						228.067	I35	3.2518e+07	10214902	6.2035e+07	15844151	329315	3.61879e+07	7.33843e+06
234.483	I36	1.51888e+07	33256448	1.03991e+07	7.24014e+06	6.22244e+07	227431651	34742761	144.861	376.639	108.674	7.26478	125.168	94.7589	151.116	70.1839	77.6074	22.3926	3.46576																						234.483	I36	33256448	1.03991e+07	6.22244e+07	1.51888e+07	360420	34742761	7.24014e+06
240.883	I37	14705827	3.40646e+07	1.06694e+07	7.30259e+06	6.25923e+07	228391411	3.35315e+07	139.665	384.17	111.03	7.29665	125.379	94.7589	145.235	71.2534	77.5787	22.4213	3.46005																						240.883	I37	3.40646e+07	1.06694e+07	6.25923e+07	14705827	347090	3.35315e+07	7.30259e+06
247.317	I38	14239042	3.5064e+07	10974416	7305505	62912748	2.28424e+08	3.24825e+07	135.212	395.386	114.189	7.29854	126.003	94.7589	140.671	72.1697	77.5913	22.4087	3.46256																						247.317	I38	3.5064e+07	10974416	62912748	14239042	404348	3.24825e+07	7305505
253.733	I39	1.36014e+07	3.56919e+07	1.11983e+07	7.1469e+06	63092163	228989235	3.12122e+07	128.838	401.472	116.231	7.12244	126.05	94.7589	134.836	73.4817	77.5487	22.4513	3.45409																						253.733	I39	3.56919e+07	1.11983e+07	63092163	1.36014e+07	393854	3.12122e+07	7.1469e+06
260.917	I40	13974774	38768823	1.20719e+07	7.06164e+06	64229965	229925991	31587115	131.836	434.305	124.787	7.0088	127.801	94.7589	135.9	72.8647	77.6803	22.3197	3.48036																						260.917	I40	38768823	1.20719e+07	64229965	13974774	525420	31587115	7.06164e+06
267.333	I41	1.25798e+07	3.67799e+07	1.14723e+07	7233952	63287935	2.28988e+08	28730333	119.162	413.712	119.075	7.20924	126.442	94.7589	124.115	75.4734	77.6506	22.3494	3.47439																						267.333	I41	3.67799e+07	1.14723e+07	63287935	1.25798e+07	414880	28730333	7233952
273.767	I42	12050683	37233163	1.16183e+07	6986042	63193271	2.28979e+08	27439976	114.154	418.826	120.595	6.96243	126.258	94.7589	118.545	76.5041	77.6436	22.3564	3.47299																						273.767	I42	37233163	1.16183e+07	63193271	12050683	418488	27439976	6986042
280.183	I43	1.14115e+07	37757860	1.1766e+07	7033594	63512176	2.29698e+08	26242962	107.761	423.399	121.746	6.98789	126.498	94.7589	113.019	77.82	77.6672	22.3328	3.47773																						280.183	I43	37757860	1.1766e+07	63512176	1.14115e+07	482623	26242962	7033594
286.583	I44	1.10176e+07	3.8555e+07	1.20207e+07	7.12628e+06	63821213	2.30143e+08	25234324	103.84	431.503	124.141	7.0663	126.868	94.7589	108.465	78.627	77.6581	22.3419	3.4759																						286.583	I44	3.8555e+07	1.20207e+07	63821213	1.10176e+07	452903	25234324	7.12628e+06
293	I45	1.05401e+07	3.89152e+07	12127661	6.86733e+06	63596507	2.29547e+08	24249996	99.5979	436.664	125.57	6.82719	126.749	94.7589	104.505	79.5001	77.6658	22.3342	3.47744																						293	I45	3.89152e+07	12127661	63596507	1.05401e+07	498374	24249996	6.86733e+06
299.433	I46	1.01556e+07	3.97035e+07	12355540	6811542	64050903	230561183	23239192	95.5422	443.55	127.367	6.74195	127.093	94.7589	99.7084	80.3349	77.6907	22.3093	3.48245																						299.433	I46	3.97035e+07	12355540	64050903	1.01556e+07	486630	23239192	6811542
305.85	I47	9803708	4.00813e+07	1.24733e+07	6939861	63945507	229807291	22288452	92.5344	449.24	129.003	6.89149	127.3	94.7589	95.9429	80.954	77.6905	22.3095	3.48239																						305.85	I47	4.00813e+07	1.24733e+07	63945507	9803708	446532	22288452	6939861
312.283	I48	9.37679e+06	40461078	12619769	6.92232e+06	63829090	229416794	21324963	88.6555	454.268	130.74	6.88577	127.285	94.7589	91.9517	81.7524	77.6516	22.3484	3.47459																						312.283	I48	40461078	12619769	63829090	9.37679e+06	533576	21324963	6.92232e+06
318.683	I49	8.76826e+06	40584493	1.26294e+07	6.81995e+06	63906562	2.30348e+08	20212311	82.5669	453.813	130.311	6.75653	126.924	94.7589	86.8018	83.0056	77.6911	22.3089	3.48252																						318.683	I49	40584493	1.26294e+07	63906562	8.76826e+06	481777	20212311	6.81995e+06
325.8	I50	9.03513e+06	4.39467e+07	1.36602e+07	6837575	64946729	2.30758e+08	20478732	84.9288	490.535	140.697	6.76196	128.761	94.7589	87.7897	82.5194	77.7107	22.2893	3.48647																						325.8	I50	4.39467e+07	1.36602e+07	64946729	9.03513e+06	574846	20478732	6837575
332.233	I51	8055926	41833696	1.29827e+07	6819795	64459148	2.31167e+08	1.85769e+07	75.5904	466.123	133.482	6.73243	127.568	94.7589	79.496	84.4415	77.7384	22.2616	3.49204																						332.233	I51	41833696	1.29827e+07	64459148	8055926	509088	1.85769e+07	6819795
338.65	I52	7770205	4.21914e+07	1.31064e+07	6705945	6.46566e+07	231122340	1.78485e+07	72.9234	470.2	134.78	6.62132	127.984	94.7589	76.3937	84.9904	77.7216	22.2784	3.48866																						338.65	I52	4.21914e+07	1.31064e+07	6.46566e+07	7770205	562364	1.78485e+07	6705945
345.05	I53	7.40566e+06	4.24696e+07	1.3156e+07	6723238	6.43356e+07	231095752	16965492	69.5102	473.355	135.306	6.63916	127.363	94.7589	72.6225	85.693	77.7699	22.2301	3.49841																						345.05	I53	4.24696e+07	1.3156e+07	6.43356e+07	7.40566e+06	512444	16965492	6723238
351.467	I54	7107568	42800162	1.3302e+07	6664362	64513988	231104400	1.63142e+07	66.7098	477.021	136.802	6.58077	127.711	94.7589	69.8319	86.2694	77.7131	22.2869	3.48694																						351.467	I54	42800162	1.3302e+07	64513988	7107568	528250	1.63142e+07	6664362
357.883	I55	6.82326e+06	4.34472e+07	1.34802e+07	6639121	64614733	231258756	1.57248e+07	63.9986	483.909	138.542	6.55147	127.825	94.7589	67.2643	86.8274	77.7425	22.2575	3.49287																						357.883	I55	4.34472e+07	1.34802e+07	64614733	6.82326e+06	550870	1.57248e+07	6639121
364.317	I56	6.52983e+06	4.37136e+07	13540233	6.53637e+06	6.4925e+07	231649871	1.49697e+07	61.143	486.054	138.924	6.43919	128.222	94.7589	63.926	87.4152	77.7714	22.2286	3.49871																						364.317	I56	4.37136e+07	13540233	6.4925e+07	6.52983e+06	583016	1.49697e+07	6.53637e+06
370.75	I57	6.29586e+06	44264894	13694138	6.59161e+06	6.51409e+07	231771420	1.44464e+07	58.9213	491.926	140.429	6.4902	128.581	94.7589	61.659	87.8725	77.7927	22.2073	3.50302																						370.75	I57	44264894	13694138	6.51409e+07	6.29586e+06	611758	1.44464e+07	6.59161e+06
377.217	I58	6.01462e+06	4.52115e+07	1.40003e+07	6634965	6.55451e+07	232337651	1.3896e+07	56.152	501.222	143.219	6.51696	129.064	94.7589	59.1652	88.4424	77.7762	22.2238	3.49969																						377.217	I58	4.52115e+07	1.40003e+07	6.55451e+07	6.01462e+06	582936	1.3896e+07	6634965
383.617	I59	5.6822e+06	4.47077e+07	1.38486e+07	6.5563e+06	6.51494e+07	2.31963e+08	13024450	53.1343	496.437	141.896	6.45011	128.492	94.7589	55.5441	89.0636	77.7708	22.2292	3.49859																						383.617	I59	4.47077e+07	1.38486e+07	6.51494e+07	5.6822e+06	565512	13024450	6.5563e+06
390.717	I60	5.8499e+06	48399765	14951241	6628895	66470573	2.32731e+08	13309565	54.5219	535.66	152.688	6.5	130.665	94.7589	56.5726	88.778	77.8182	22.1818	3.50819																						390.717	I60	48399765	14951241	66470573	5.8499e+06	578902	13309565	6628895
397.117	I61	5067348	4.53452e+07	14052408	6486060	65312901	2.32301e+08	11860448	47.3158	502.782	143.775	6.37171	128.627	94.7589	50.5064	90.2612	77.7631	22.2369	3.49702																						397.117	I61	4.53452e+07	14052408	65312901	5067348	606734	11860448	6486060
403.517	I62	4.88578e+06	45689737	1.4176e+07	6515056	65473927	2.3274e+08	1.14086e+07	45.5344	505.647	144.765	6.38812	128.701	94.7589	48.4906	90.6278	77.7425	22.2575	3.49287																						403.517	I62	45689737	1.4176e+07	65473927	4.88578e+06	673530	1.14086e+07	6515056
409.917	I63	4.71815e+06	45793941	1.42025e+07	6.50566e+06	6.55025e+07	232694858	10881376	43.9806	506.899	145.065	6.38015	128.782	94.7589	46.2587	90.9476	77.7496	22.2504	3.4943																						409.917	I63	45793941	1.42025e+07	6.55025e+07	4.71815e+06	604023	10881376	6.50566e+06
416.317	I64	4520218	4.66001e+07	1.4412e+07	6470746	65974263	2.33303e+08	10474244	42.0257	514.476	146.821	6.32936	129.371	94.7589	44.4118	91.35	77.7981	22.2019	3.50411																						416.317	I64	4.66001e+07	1.4412e+07	65974263	4520218	617492	10474244	6470746
422.75	I65	4.31105e+06	4.7018e+07	14556902	6.42898e+06	6.60837e+07	2.33622e+08	1.00153e+07	40.0264	518.384	148.094	6.27994	129.409	94.7589	42.4079	91.7615	77.7796	22.2204	3.50036																						422.75	I65	4.7018e+07	14556902	6.60837e+07	4.31105e+06	644197	1.00153e+07	6.42898e+06
429.15	I66	4154916	47313391	1.45988e+07	6.30443e+06	66515033	2.3408e+08	9.60194e+06	38.5012	520.618	148.23	6.14621	129.999	94.7589	40.578	92.0754	77.8381	22.1619	3.51224																						429.15	I66	47313391	1.45988e+07	66515033	4154916	581425	9.60194e+06	6.30443e+06
435.583	I67	3.88903e+06	47418151	1.46533e+07	6487664	6.62155e+07	2.34019e+08	9.05248e+06	36.0468	521.907	148.822	6.32649	129.447	94.7589	38.266	92.5806	77.8119	22.1881	3.50692																						435.583	I67	47418151	1.46533e+07	6.62155e+07	3.88903e+06	627254	9.05248e+06	6487664
442	I68	3.74375e+06	4.7411e+07	14722231	6469019	6.62014e+07	2.3379e+08	8598125	34.7343	522.341	149.669	6.3145	129.546	94.7589	36.381	92.8508	77.7282	22.2718	3.48998																						442	I68	4.7411e+07	14722231	6.62014e+07	3.74375e+06	682667	8598125	6469019
448.383	I69	3462048	4.7968e+07	1.4806e+07	6343624	6.67394e+07	2.34809e+08	8286266	31.9813	526.184	149.867	6.16523	130.032	94.7589	34.9093	93.4174	77.832	22.168	3.51101																						448.383	I69	4.7968e+07	1.4806e+07	6.67394e+07	3462048	656490	8286266	6343624
455.517	I70	3.60775e+06	5.17179e+07	16006562	6425055	6.7564e+07	2.33903e+08	8425201	33.4562	569.515	162.646	6.26855	132.149	94.7589	35.632	93.1138	77.7854	22.2146	3.50155																						455.517	I70	5.17179e+07	16006562	6.7564e+07	3.60775e+06	765306	8425201	6425055
461.9	I71	3.21349e+06	4.83118e+07	15002504	6.44617e+06	66587760	2.34432e+08	7503751	29.7328	530.807	152.1	6.27496	129.945	94.7589	31.6634	93.8802	77.7276	22.2724	3.48986																						461.9	I71	4.83118e+07	15002504	66587760	3.21349e+06	744390	7503751	6.44617e+06
468.317	I72	3143252	49099398	15248635	6390250	67185180	235258532	7.27668e+06	28.9808	537.565	154.052	6.19867	130.651	94.7589	30.5974	94.035	77.7258	22.2742	3.4895																						468.317	I72	49099398	15248635	67185180	3143252	670026	7.27668e+06	6390250
474.717	I73	2884609	4.86071e+07	15250826	6.26408e+06	6.65354e+07	2.33878e+08	6903834	26.7531	535.317	154.984	6.11217	130.151	94.7589	29.201	94.4935	77.5483	22.4517	3.45401																						474.717	I73	4.86071e+07	15250826	6.65354e+07	2884609	701172	6903834	6.26408e+06
481.1	I74	2.78024e+06	4.88888e+07	1.53692e+07	6345851	67106774	2.35114e+08	6597928	25.6496	535.588	155.366	6.15939	130.578	94.7589	27.7604	94.7206	77.5143	22.4857	3.44728																						481.1	I74	4.88888e+07	1.53692e+07	67106774	2.78024e+06	758832	6597928	6345851
487.517	I75	2679285	49255124	15598139	6364166	6.73029e+07	2.34993e+08	6348590	24.7309	539.879	157.761	6.18034	131.027	94.7589	26.725	94.9097	77.3864	22.6136	3.42213																						487.517	I75	49255124	15598139	6.73029e+07	2679285	725686	6348590	6364166
493.933	I76	2429501	4.90973e+07	1.55625e+07	6278135	6.70003e+07	234792065	6.02564e+06	22.4445	538.61	157.535	6.10202	130.55	94.7589	25.3873	95.3803	77.3703	22.6297	3.41897																						493.933	I76	4.90973e+07	1.55625e+07	6.70003e+07	2429501	701029	6.02564e+06	6278135
500.333	I77	2.3535e+06	4.97323e+07	15711906	6287815	67493495	235713216	5.71576e+06	21.6575	543.444	158.426	6.08754	130.997	94.7589	23.9876	95.5423	77.428	22.572	3.43026																						500.333	I77	4.97323e+07	15711906	67493495	2.3535e+06	713482	5.71576e+06	6287815
506.75	I78	2.25339e+06	49834318	15800491	6.32986e+06	67340804	235542265	5516370	20.7512	544.954	159.435	6.1327	130.796	94.7589	23.1676	95.7289	77.3655	22.6345	3.41803																						506.75	I78	49834318	15800491	67340804	2.25339e+06	730985	5516370	6.32986e+06
513.167	I79	2231620	49864444	15700713	6.34808e+06	67567140	235398719	5244522	20.5633	545.616	158.525	6.1541	131.315	94.7589	22.0393	95.7675	77.4867	22.5133	3.44183																						513.167	I79	49864444	15700713	67567140	2231620	644010	5244522	6.34808e+06
520.267	I80	2259394	54232616	1.6738e+07	6.22622e+06	6.85883e+07	2.35998e+08	5.32375e+06	20.7664	591.905	168.569	6.02063	132.961	94.7589	22.3155	95.7257	77.8337	22.1663	3.51136																						520.267	I80	54232616	1.6738e+07	6.85883e+07	2259394	767588	5.32375e+06	6.22622e+06
526.683	I81	1988354	50582606	1.60009e+07	6300265	67768489	2.35987e+08	4.80509e+06	18.276	552.093	161.153	6.09251	131.378	94.7589	20.1423	96.2383	77.4057	22.5943	3.42589																						526.683	I81	50582606	1.60009e+07	67768489	1988354	687722	4.80509e+06	6300265
533.117	I82	1830362	5.10454e+07	1.61406e+07	6.26813e+06	6.79955e+07	2.35949e+08	4582860	16.8266	557.236	162.586	6.06242	131.84	94.7589	19.2139	96.5366	77.413	22.587	3.42733																						533.117	I82	5.10454e+07	1.61406e+07	6.79955e+07	1830362	724968	4582860	6.26813e+06
539.533	I83	1776181	5.07331e+07	1.60179e+07	6.17792e+06	6.79157e+07	2.36146e+08	4333536	16.3149	553.364	161.216	5.97019	131.575	94.7589	18.1534	96.642	77.439	22.561	3.43244																						539.533	I83	5.07331e+07	1.60179e+07	6.79157e+07	1776181	628167	4333536	6.17792e+06
545.933	I84	1.601e+06	5.08529e+07	16056911	6242398	6.78646e+07	236059686	4.14731e+06	14.7111	554.874	161.668	6.0347	131.524	94.7589	17.3797	96.9721	77.4378	22.5622	3.43219																						545.933	I84	5.08529e+07	16056911	6.78646e+07	1.601e+06	679651	4.14731e+06	6242398
552.383	I85	1.59924e+06	5.14737e+07	16242494	6255264	6.81816e+07	2.36559e+08	3919954	14.664	560.463	163.191	6.03439	131.86	94.7589	16.3923	96.9818	77.449	22.551	3.4344																						552.383	I85	5.14737e+07	16242494	6.81816e+07	1.59924e+06	735396	3919954	6255264
558.783	I86	1.49447e+06	51217359	1.61289e+07	6292827	67992718	236116684	3688557	13.7289	558.715	162.353	6.08199	131.74	94.7589	15.4535	97.1742	77.4844	22.5156	3.44136																						558.783	I86	51217359	1.61289e+07	67992718	1.49447e+06	724782	3688557	6292827
565.2	I87	1379848	52120738	16289367	6142331	68457186	236885978	3591671	12.6348	566.724	163.436	5.91725	132.21	94.7589	14.9987	97.3994	77.6164	22.3836	3.46756																						565.2	I87	52120738	16289367	68457186	1379848	698280	3591671	6142331
571.617	I88	1.36936e+06	5.16576e+07	1.61935e+07	6201785	6.82526e+07	2.36782e+08	3362568	12.5443	561.935	162.545	5.97716	131.872	94.7589	14.0482	97.4181	77.5639	22.4361	3.4571																						571.617	I88	5.16576e+07	1.61935e+07	6.82526e+07	1.36936e+06	741984	3362568	6201785
578.017	I89	1319250	5.20874e+07	1.62087e+07	6.09171e+06	68311581	236572831	3247796	12.0959	567.111	162.842	5.87626	132.103	94.7589	13.5807	97.5103	77.6915	22.3085	3.48259																						578.017	I89	5.20874e+07	1.62087e+07	68311581	1319250	749108	3247796	6.09171e+06
585.133	I90	1.32011e+06	5.63993e+07	17573791	6.15481e+06	69719925	237713363	3314205	12.0458	611.112	175.709	5.90864	134.18	94.7589	13.7919	97.5207	77.6685	22.3315	3.47797																						585.133	I90	5.63993e+07	17573791	69719925	1.32011e+06	812660	3314205	6.15481e+06
591.567	I91	1170322	52413631	1.65324e+07	6180674	68800004	237285900	2.96082e+06	10.6982	568.948	165.595	5.94416	132.648	94.7589	12.3435	97.798	77.456	22.544	3.43578																						591.567	I91	52413631	1.65324e+07	68800004	1170322	684772	2.96082e+06	6180674
597.983	I92	1035114	52623259	1.65253e+07	6068186	6.8876e+07	2.37674e+08	2.8125e+06	9.44675	570.29	165.253	5.82643	132.577	94.7589	11.706	98.0556	77.5332	22.4668	3.451																						597.983	I92	52623259	1.65253e+07	6.8876e+07	1035114	739226	2.8125e+06	6068186
604.417	I93	1025263	5.32479e+07	16636152	6045217	68900536	237521647	2.70325e+06	9.36286	577.431	166.469	5.80811	132.71	94.7589	11.2585	98.0729	77.6222	22.3778	3.46871																						604.417	I93	5.32479e+07	16636152	68900536	1025263	769156	2.70325e+06	6045217
610.833	I94	956834	5.30375e+07	16690100	6044604	6.92873e+07	2.38116e+08	2574103	8.71615	573.713	166.592	5.79303	133.122	94.7589	10.6939	98.206	77.4969	22.5031	3.44383																						610.833	I94	5.30375e+07	16690100	6.92873e+07	956834	696081	2574103	6044604
617.25	I95	873000	5.28684e+07	16567024	5.9489e+06	68696902	2.37114e+08	2.43713e+06	7.98606	574.3	166.062	5.72539	132.545	94.7589	10.1676	98.3563	77.5702	22.4298	3.45835																						617.25	I95	5.28684e+07	16567024	68696902	873000	784989	2.43713e+06	5.9489e+06
623.667	I96	782126	52965936	1.66843e+07	6070754	6.90028e+07	2.381e+08	2311724	7.12516	572.978	166.545	5.81848	132.584	94.7589	9.60447	98.5335	77.4794	22.5206	3.44039																						623.667	I96	52965936	1.66843e+07	6.90028e+07	782126	828609	2311724	6070754
630.067	I97	833126	52858617	16590573	6108218	6.89791e+07	2.38268e+08	2207271	7.58441	571.413	165.492	5.85026	132.445	94.7589	9.16403	98.4389	77.5422	22.4578	3.4528																						630.067	I97	52858617	16590573	6.89791e+07	833126	763970	2207271	6108218
636.483	I98	801520	5.31816e+07	16727802	6116803	6.89996e+07	2.37614e+08	2.13983e+06	7.31678	576.489	167.321	5.87462	132.849	94.7589	8.9085	98.494	77.5049	22.4951	3.44541																						636.483	I98	5.31816e+07	16727802	6.89996e+07	801520	764460	2.13983e+06	6116803
642.883	I99	739748	53252562	1.66725e+07	6.11733e+06	69067974	238482811	2.05025e+06	6.72827	575.153	166.16	5.85371	132.496	94.7589	8.50444	98.6151	77.5857	22.4143	3.46144																						642.883	I99	53252562	1.66725e+07	69067974	739748	757598	2.05025e+06	6.11733e+06
650.167	I100	783806	5.76911e+07	17770045	6116276	7.01029e+07	2.37834e+08	2061586	7.14843	624.791	177.581	5.86866	134.848	94.7589	8.57479	98.5287	77.868	22.132	3.51834																						650.167	I100	5.76911e+07	17770045	7.01029e+07	783806	844267	2061586	6116276
656.567	I101	683402	53309590	16506290	6000394	68632912	236855917	1841813	6.25847	579.724	165.633	5.78125	132.566	94.7589	7.69233	98.7118	77.778	22.222	3.50004																						656.567	I101	53309590	16506290	68632912	683402	728433	1841813	6000394
662.983	I102	644176	53649076	16696353	6.02072e+06	68896050	236881512	1752281	5.89862	583.353	167.522	5.8002	133.06	94.7589	7.31761	98.7859	77.6897	22.3103	3.48224																						662.983	I102	53649076	16696353	68896050	644176	749780	1752281	6.02072e+06
669.4	I103	565922	53341494	16687856	6041896	68797508	237010440	1.68224e+06	5.17923	579.693	167.346	5.81744	132.797	94.7589	7.02131	98.934	77.5987	22.4013	3.46403																						669.4	I103	53341494	16687856	68797508	565922	675152	1.68224e+06	6041896
675.8	I104	544256	53592333	1.66451e+07	5.88068e+06	69037669	237943197	1.59093e+06	4.96143	580.136	166.264	5.64001	132.738	94.7589	6.61415	98.9788	77.7246	22.2754	3.48925																						675.8	I104	53592333	1.66451e+07	69037669	544256	767660	1.59093e+06	5.88068e+06
682.25	I105	528872	54247277	16796086	5.91887e+06	6.93029e+07	237717881	1523877	4.82575	587.782	167.93	5.68203	133.375	94.7589	6.3414	99.0067	77.7785	22.2215	3.50016																						682.25	I105	54247277	16796086	6.93029e+07	528872	772480	1523877	5.91887e+06
688.683	I106	511754	5.49861e+07	17063226	6001221	6.97903e+07	238758745	1.51165e+06	4.6492	593.19	169.857	5.73597	133.727	94.7589	6.26309	99.0431	77.7396	22.2604	3.49228																						688.683	I106	5.49861e+07	17063226	6.97903e+07	511754	814496	1.51165e+06	6001221
695.083	I107	491826	54098635	1.6786e+07	5.99334e+06	6.93776e+07	2.38589e+08	1.44992e+06	4.47135	584.031	167.216	5.73251	133.031	94.7589	6.01159	99.0797	77.7415	22.2585	3.49267																						695.083	I107	54098635	1.6786e+07	6.93776e+07	491826	615497	1.44992e+06	5.99334e+06
701.5	I108	418280	54303009	1.68388e+07	5997809	69520690	2.38304e+08	1.39117e+06	3.80726	586.938	167.943	5.74364	133.465	94.7589	5.7749	99.2164	77.7524	22.2476	3.49486																						701.5	I108	54303009	1.68388e+07	69520690	418280	757276	1.39117e+06	5997809
707.917	I109	392512	54183591	1.68224e+07	5892859	6.94302e+07	2.38156e+08	1288456	3.57493	586.012	167.884	5.64665	133.374	94.7589	5.35186	99.2642	77.7312	22.2688	3.49058																						707.917	I109	54183591	1.68224e+07	6.94302e+07	392512	685655	1288456	5892859
715.033	I110	403112	58753281	18122532	5993887	70486860	237334016	1.31247e+06	3.68419	637.635	181.485	5.76335	135.873	94.7589	5.47048	99.2417	77.8439	22.1561	3.51343																						715.033	I110	58753281	18122532	70486860	403112	830814	1.31247e+06	5993887
721.433	I111	331356	5.44122e+07	16869486	5.97135e+06	6.9219e+07	237425530	1.20454e+06	3.02722	590.295	168.872	5.73947	133.377	94.7589	5.01867	99.3769	77.7556	22.2444	3.49552																						721.433	I111	5.44122e+07	16869486	6.9219e+07	331356	785827	1.20454e+06	5.97135e+06
727.867	I112	334648	55131528	1.71058e+07	5.94538e+06	69906662	2.38317e+08	1.16728e+06	3.04585	595.861	170.597	5.69312	134.198	94.7589	4.84524	99.3731	77.7421	22.2579	3.49279																						727.867	I112	55131528	1.71058e+07	69906662	334648	759752	1.16728e+06	5.94538e+06
734.3	I113	319806	5.49718e+07	17094016	5925875	6.95606e+07	2.3783e+08	1112195	2.91673	595.35	170.828	5.68606	133.807	94.7589	4.62605	99.3997	77.7039	22.2961	3.48508																						734.3	I113	5.49718e+07	17094016	6.95606e+07	319806	659170	1112195	5925875
740.7	I114	324780	55015611	17105745	5942584	69852631	238953487	1.09475e+06	2.94817	593.025	170.142	5.67529	133.737	94.7589	4.53208	99.3932	77.7058	22.2942	3.48547																						740.7	I114	55015611	17105745	69852631	324780	766546	1.09475e+06	5942584
747.117	I115	308489	55114267	1.71223e+07	5.95681e+06	69794961	2.38799e+08	1049984	2.8021	594.472	170.417	5.69256	133.713	94.7589	4.34957	99.4233	77.7201	22.2799	3.48834																						747.117	I115	55114267	1.71223e+07	69794961	308489	722883	1049984	5.95681e+06
753.517	I116	292574	5.49188e+07	1.70177e+07	5.82995e+06	69603918	2.38102e+08	982649	2.66531	594.097	169.872	5.58763	133.738	94.7589	4.08255	99.4514	77.7646	22.2354	3.49733																						753.517	I116	5.49188e+07	1.70177e+07	69603918	292574	723823	982649	5.82995e+06
759.917	I117	246349	5.51992e+07	1.70356e+07	5.77592e+06	6.9586e+07	2.38011e+08	934274	2.24508	597.361	170.115	5.53798	133.755	94.7589	3.88306	99.5379	77.8345	22.1655	3.51151																						759.917	I117	5.51992e+07	1.70356e+07	6.9586e+07	246349	721888	934274	5.77592e+06
766.317	I118	212051	5.52562e+07	1.71528e+07	5.81459e+06	69781146	2.38636e+08	921924	1.92744	596.412	170.837	5.56045	133.779	94.7589	3.8217	99.6033	77.7338	22.2662	3.49111																						766.317	I118	5.52562e+07	1.71528e+07	69781146	212051	770578	921924	5.81459e+06
772.75	I119	156516	55749128	1.73121e+07	5.85472e+06	70291919	2.39068e+08	922702	1.42008	600.643	172.112	5.5887	134.514	94.7589	3.818	99.7077	77.7275	22.2725	3.48984																						772.75	I119	55749128	1.73121e+07	70291919	156516	764254	922702	5.85472e+06
779.85	I120	112658	6.03253e+07	18600996	5838342	71363663	239524013	930356	1.02021	648.71	184.574	5.56246	136.305	94.7589	3.84235	99.79	77.8498	22.1502	3.51464																						779.85	I120	6.03253e+07	18600996	71363663	112658	844942	930356	5838342
786.283	I121	227112	5.60407e+07	1.73277e+07	5894471	70328328	2.39329e+08	826957	2.05836	603.125	172.079	5.6205	134.437	94.7589	3.41809	99.5763	77.8021	22.1979	3.50493																						786.283	I121	5.60407e+07	1.73277e+07	70328328	227112	727036	826957	5894471
792.667	I122	198442	55431070	17171662	5881851	6.97299e+07	2.38344e+08	801756	1.80594	599.03	171.234	5.63165	133.844	94.7589	3.32762	99.6283	77.7694	22.2306	3.49831																						792.667	I122	55431070	17171662	6.97299e+07	198442	722588	801756	5881851
799.1	I123	168790	5.56852e+07	1.72774e+07	5821414	70001116	2.38372e+08	784504	1.53591	601.706	172.268	5.57313	134.349	94.7589	3.25564	99.6839	77.7424	22.2576	3.49284																						799.1	I123	5.56852e+07	1.72774e+07	70001116	168790	715554	784504	5821414
805.5	I124	124226	55449456	17164255	5817542	70019808	238927693	743854	1.12778	597.766	170.742	5.55647	134.072	94.7589	3.07977	99.7679	77.7826	22.2174	3.50098																						805.5	I124	55449456	17164255	70019808	124226	796743	743854	5817542
811.9	I125	131542	5.55122e+07	1.71986e+07	5845464	6.98311e+07	2.38777e+08	740053	1.19495	598.82	171.192	5.58667	133.795	94.7589	3.06596	99.754	77.7676	22.2324	3.49795																						811.9	I125	5.55122e+07	1.71986e+07	6.98311e+07	131542	742082	740053	5845464
818.3	I126	120260	55543210	17258075	5.78308e+06	70045418	2.39435e+08	726200	1.08945	597.508	171.312	5.51186	133.837	94.7589	3.00031	99.7758	77.7176	22.2824	3.48784																						818.3	I126	55543210	17258075	70045418	120260	676688	726200	5.78308e+06
824.683	I127	141251	55615676	1.73229e+07	5.70389e+06	6.99445e+07	239014345	712938	1.28187	599.34	172.258	5.44595	133.879	94.7589	2.9507	99.7362	77.6752	22.3248	3.47932																						824.683	I127	55615676	1.73229e+07	6.99445e+07	141251	668396	712938	5.70389e+06
831.1	I128	110938	55665108	1.72972e+07	5.74454e+06	7.00759e+07	2.39028e+08	664172	1.00672	599.838	171.992	5.48443	134.123	94.7589	2.7487	99.7928	77.7163	22.2837	3.48758																						831.1	I128	55665108	1.72972e+07	7.00759e+07	110938	758708	664172	5.74454e+06
837.55	I129	108637	5.63476e+07	1.73276e+07	5.68436e+06	70431675	2.39598e+08	644484	0.983494	605.75	171.885	5.41408	134.483	94.7589	2.66088	99.7976	77.8964	22.1036	3.52415																						837.55	I129	5.63476e+07	1.73276e+07	70431675	108637	779051	644484	5.68436e+06
844.817	I130	123188	61328490	18933130	5844177	71868001	2.40593e+08	704408	1.11061	656.568	187.035	5.54328	136.658	94.7589	2.89626	99.7714	77.829	22.171	3.51041																						844.817	I130	61328490	18933130	71868001	123188	755238	704408	5844177
851.283	I131	57446.5	5.67554e+07	17639255	5.83908e+06	7.09731e+07	240414446	645310	0.518298	608.06	174.382	5.54255	135.057	94.7589	2.65524	99.8933	77.7131	22.2869	3.48694																						851.283	I131	5.67554e+07	17639255	7.09731e+07	57446.5	822916	645310	5.83908e+06
857.7	I132	92068	5.65982e+07	17408037	5814549	70592897	2.40659e+08	613967	0.829818	605.759	171.921	5.51366	134.197	94.7589	2.52371	99.8292	77.8931	22.1069	3.52347																						857.7	I132	5.65982e+07	17408037	70592897	92068	705570	613967	5814549
864.1	I133	-68415.5	55961032	17776421	5805137	70600064	240141746	556058	-0.617964	600.231	175.938	5.5166	134.5	94.7589	2.2906	100.127	77.3325	22.6675	3.41161																						864.1	I133	55961032	17776421	70600064	-68415.5	818696	556058	5805137
870.533	I134	87528	56821521	1.73905e+07	5656060	70445244	2.39051e+08	593154	0.794206	612.241	172.903	5.39945	134.817	94.7589	2.45456	99.8365	77.9782	22.0218	3.54095																						870.533	I134	56821521	1.73905e+07	70445244	87528	737275	593154	5656060
876.983	I135	46353	5.71442e+07	17727236	5.7041e+06	7.10157e+07	2.4046e+08	580316	0.418131	612.111	175.219	5.41342	135.113	94.7589	2.38737	99.9139	77.7451	22.2549	3.4934																						876.983	I135	5.71442e+07	17727236	7.10157e+07	46353	643478	580316	5.7041e+06
883.417	I136	96972	56347820	1.75391e+07	5.66115e+06	70452441	239642770	565860	0.877725	605.638	173.95	5.39097	134.498	94.7589	2.33583	99.8193	77.6869	22.3131	3.48168																						883.417	I136	56347820	1.75391e+07	70452441	96972	709761	565860	5.66115e+06
889.833	I137	76756	56596683	17576962	5.65851e+06	70741788	240582985	568835	0.692029	605.935	173.645	5.36739	134.522	94.7589	2.33894	99.8576	77.7259	22.2741	3.48951																						889.833	I137	56596683	17576962	70741788	76756	743823	568835	5.65851e+06
896.233	I138	-6412	5.62929e+07	17797796	5694785	7.08674e+07	2.40598e+08	490633	-0.0578066	602.644	175.815	5.40146	134.753	94.7589	2.01725	100.012	77.415	22.585	3.42772																						896.233	I138	5.62929e+07	17797796	7.08674e+07	-6412	847182	490633	5694785
902.65	I139	-48404.5	5.62386e+07	17806176	5687740	7.06771e+07	2.40082e+08	507775	-0.437323	603.358	176.276	5.40638	134.68	94.7589	2.09222	100.09	77.3899	22.6101	3.4228																						902.65	I139	5.62386e+07	17806176	7.06771e+07	-48404.5	778124	507775	5687740
909.767	I140	37486	61743821	1.90873e+07	5.67865e+06	72099804	240499537	554060	0.338089	661.271	188.631	5.38837	137.152	94.7589	2.27897	99.9304	77.8056	22.1944	3.50563																						909.767	I140	61743821	1.90873e+07	72099804	37486	847017	554060	5.67865e+06
916.167	I141	43293.5	57180207	17717291	5.63755e+06	71191841	2.40986e+08	493056	0.389679	611.159	174.738	5.33857	135.152	94.7589	2.02395	99.9198	77.7658	22.2342	3.49757																						916.167	I141	57180207	17717291	71191841	43293.5	710380	493056	5.63755e+06
922.583	I142	13571	57116874	1.7691e+07	5573538	7.10279e+07	2.41378e+08	482606	0.121952	609.49	174.196	5.26937	134.621	94.7589	1.97784	99.9749	77.7723	22.2277	3.49888																						922.583	I142	57116874	1.7691e+07	7.10279e+07	13571	773230	482606	5573538
929	I143	22011	56942548	17676074	5.65946e+06	71033206	241403500	505311	0.197776	607.566	174.03	5.35005	134.617	94.7589	2.07068	99.9593	77.734	22.266	3.49115																						929	I143	56942548	17676074	71033206	22011	752926	505311	5.65946e+06
935.433	I144	52002	5.79674e+07	18005777	5.70245e+06	7.13511e+07	241178220	466650	0.467691	619.079	177.442	5.39572	135.346	94.7589	1.91404	99.9037	77.7229	22.2771	3.48891																						935.433	I144	5.79674e+07	18005777	7.13511e+07	52002	713350	466650	5.70245e+06
941.85	I145	40141.5	5.68407e+07	1.75968e+07	5676732	70782130	2.40173e+08	476499	0.362532	609.588	174.138	5.39388	134.829	94.7589	1.96262	99.9254	77.7807	22.2193	3.5006																						941.85	I145	5.68407e+07	1.75968e+07	70782130	40141.5	768396	476499	5676732
948.267	I146	39979.5	57427781	17838881	5.66124e+06	71116704	240688010	434477	0.360296	614.565	176.155	5.36764	135.176	94.7589	1.7857	99.9258	77.7222	22.2778	3.48877																						948.267	I146	57427781	17838881	71116704	39979.5	729368	434477	5.66124e+06
954.683	I147	45483	57563327	1.78417e+07	5677344	7.13031e+07	241007758	450588	0.40935	615.198	175.95	5.37577	135.351	94.7589	1.84946	99.9157	77.7602	22.2398	3.49644																						954.683	I147	57563327	1.78417e+07	7.13031e+07	45483	724145	450588	5677344
961.1	I148	22053	5.70456e+07	1.76955e+07	5.56666e+06	7.10927e+07	241060562	430196	0.198435	609.531	174.47	5.26981	134.922	94.7589	1.76537	99.9592	77.7462	22.2538	3.49362																						961.1	I148	5.70456e+07	1.76955e+07	7.10927e+07	22053	700860	430196	5.56666e+06
967.5	I149	43291.5	5.73251e+07	17744273	5580946	71136865	241340161	424064	0.38909	611.808	174.748	5.27721	134.849	94.7589	1.7382	99.9199	77.7832	22.2168	3.5011																						967.5	I149	5.73251e+07	17744273	71136865	43291.5	705238	424064	5580946
974.6	I150	47969.5	6.28057e+07	19386842	5573805	7.25791e+07	241931493	452289	0.43008	668.662	190.457	5.25758	137.247	94.7589	1.84936	99.9115	77.8311	22.1689	3.51083																						974.6	I150	6.28057e+07	19386842	7.25791e+07	47969.5	817912	452289	5573805
981.017	I151	49417	5.77615e+07	1.79041e+07	5657864	71330070	241384647	440134	0.444062	616.352	176.289	5.34896	135.191	94.7589	1.80373	99.9086	77.7593	22.2407	3.49627																						981.017	I151	5.77615e+07	1.79041e+07	71330070	49417	634370	440134	5657864
987.45	I152	13975	5.82332e+07	17943154	5626427	7.16456e+07	2.4223e+08	398907	0.125141	619.218	176.057	5.30068	135.315	94.7589	1.62908	99.9742	77.8621	22.1379	3.51714																						987.45	I152	5.82332e+07	17943154	7.16456e+07	13975	793478	398907	5626427
993.85	I153	16553	5.75182e+07	1.7775e+07	5.65433e+06	71398209	2.42091e+08	406060	0.148312	611.966	174.507	5.33003	134.925	94.7589	1.65924	99.9695	77.8114	22.1886	3.50682																						993.85	I153	5.75182e+07	1.7775e+07	71398209	16553	702726	406060	5.65433e+06
1000.27	I154	33711	57523262	17856913	5509720	71303197	242240300	386432	0.301857	611.642	175.203	5.1905	134.662	94.7589	1.57806	99.9379	77.7334	22.2666	3.49104																						1000.27	I154	57523262	17856913	71303197	33711	667707	386432	5509720
1006.67	I155	6505.5	5.75334e+07	1.78006e+07	5.5068e+06	71438579	242453995	398434	0.0582007	611.211	174.497	5.18318	134.799	94.7589	1.62564	99.988	77.7911	22.2089	3.50271																						1006.67	I155	5.75334e+07	1.78006e+07	71438579	6505.5	748736	398434	5.5068e+06
1013.08	I156	-12986.5	5.74087e+07	18216624	5.63292e+06	71666274	2.42374e+08	401296	-0.116221	610.088	178.634	5.30364	135.274	94.7589	1.63786	100.024	77.3514	22.6486	3.41529																						1013.08	I156	5.74087e+07	18216624	71666274	-12986.5	759148	401296	5.63292e+06
1019.52	I157	41504.5	5.89007e+07	1.80442e+07	5.59664e+06	72113592	242520756	406218	0.371213	625.564	176.836	5.26629	136.035	94.7589	1.65694	99.9236	77.9616	22.0384	3.53754																						1019.52	I157	5.89007e+07	1.80442e+07	72113592	41504.5	737232	406218	5.59664e+06
1025.95	I158	37294	58114642	17944714	5.57341e+06	7.15294e+07	241904877	369656	0.334404	618.787	176.309	5.25778	135.277	94.7589	1.51165	99.9312	77.8254	22.1746	3.50967																						1025.95	I158	58114642	17944714	7.15294e+07	37294	747886	369656	5.57341e+06
1032.37	I159	-8019.5	57914923	1.79579e+07	5539213	71652122	242634724	361564	-0.071692	614.805	175.908	5.2098	135.101	94.7589	1.47411	100.015	77.7532	22.2468	3.49503																						1032.37	I159	57914923	1.79579e+07	71652122	-8019.5	714560	361564	5539213
1039.58	I160	22545	6.38063e+07	19682519	5.55769e+06	7.31702e+07	242709754	407498	0.201484	677.137	192.742	5.22557	137.921	94.7589	1.66087	99.9585	77.8427	22.1573	3.51318																						1039.58	I160	6.38063e+07	19682519	7.31702e+07	22545	746572	407498	5.55769e+06
1046.02	I161	30642.5	58305106	1.80839e+07	5520820	71913579	242864031	377108	0.273677	618.363	176.975	5.1876	135.466	94.7589	1.53603	99.9437	77.7485	22.2515	3.49407																						1046.02	I161	58305106	1.80839e+07	71913579	30642.5	687090	377108	5520820
1052.45	I162	-52957.5	5.77629e+07	18163276	5.45452e+06	7.17998e+07	242660875	358760	-0.473374	613.125	177.9	5.1296	135.365	94.7589	1.46252	100.097	77.5102	22.4898	3.44645																						1052.45	I162	5.77629e+07	18163276	7.17998e+07	-52957.5	765214	358760	5.45452e+06
1058.85	I163	-73970	57639802	18229947	5.49019e+06	71722055	242626727	316069	-0.661293	611.905	178.579	5.16387	135.238	94.7589	1.28866	100.136	77.4089	22.5911	3.42653																						1058.85	I163	57639802	18229947	71722055	-73970	824650	316069	5.49019e+06
1065.28	I164	26157	58083390	18013109	5439562	7.16277e+07	2.42936e+08	348407	0.233547	615.83	176.23	5.10974	134.888	94.7589	1.41871	99.9519	77.7504	22.2496	3.49447																						1065.28	I164	58083390	18013109	7.16277e+07	26157	667200	348407	5439562
1071.7	I165	-14939.5	58410759	18081027	5467077	7.18395e+07	2.43035e+08	367808	-0.133335	619.048	176.822	5.13349	135.232	94.7589	1.4971	100.027	77.7825	22.2175	3.50096																						1071.7	I165	58410759	18081027	7.18395e+07	-14939.5	756472	367808	5467077
[truncated: 1 more columns]

## Sheet: Hydride
time [min]:	Peak name	A/B	C	Riv 1	Riv 2	[A/B]	[C]	Sum Hyds	%			1	2
0.0166667	I0	-26040.8	27646	-521.708	553.867	-0.00450658	0.00478437	0.000277797	0.0114579	RG Calibration				Flow Calibration
6.53333	I1	-28774.9	14548.2	-576.484	291.462	-0.00497974	0.00251769	-0.00246205	-0.101549		Hyd 1	Hyd 2			Hyd1	Hyd 2	1-hexene
13	I2	1.53591e+06	24398.2	30770.8	488.799	0.265802	0.0042223	0.270024	11.1373	CF	0.9894	0.9894		0 mL/min	4.56654e+06	4.56654e+06	29142933
19.4167	I3	3.0351e+06	21128.6	60806	423.296	0.525249	0.00365648	0.528906	21.8151	RG Hyd	203	203		4 mL/min	4.44376e+06	4.44376e+06	6.75363e+06
25.8333	I4	4.21957e+06	51142.8	84535.9	1024.61	0.730231	0.00885068	0.739082	30.4839	RG 1H	4	4		CF	1.02763	1.02763	4.31515
32.2333	I5	5.09741e+06	4979.93	102123	99.7692	0.882148	0.000861818	0.88301	36.4204	Int TMB	9.87287e+07	9.87287e+07
38.6333	I6	5.89688e+06	38294.4	118139	767.198	1.0205	0.00662715	1.02713	42.3647	[TMB]	94.7589	94.7589
45.0333	I7	6.466e+06	-2631.31	129541	-52.7162	1.11899	-0.000455369	1.11854	46.1349
51.4333	I8	6.88335e+06	12955.1	137903	259.545	1.19122	0.00224198	1.19346	49.2252	IRF	51.2937	51.2937
57.85	I9	7.12159e+06	-10132.8	142676	-203.003	1.23245	-0.00175357	1.23069	50.7609
65.0333	I10	7.33327e+06	52088.5	146916	1043.55	1.26908	0.00901434	1.2781	52.716
71.4667	I11	7.46451e+06	18954.3	149546	379.735	1.29179	0.00328019	1.29507	53.4162
77.8833	I12	7.50002e+06	-18265.6	150257	-365.938	1.29794	-0.00316102	1.29478	53.4041
84.3167	I13	7.60713e+06	26324.1	152403	527.384	1.31648	0.00455561	1.32103	54.4869
90.7667	I14	7.65698e+06	3685.78	153402	73.8417	1.3251	0.000637854	1.32574	54.6811
97.1667	I15	7.71273e+06	12780	154519	256.037	1.33475	0.00221168	1.33696	55.144
103.583	I16	7.74081e+06	41574.6	155081	832.916	1.33961	0.00719483	1.3468	55.5499
110.067	I17	7.75776e+06	99190.7	155421	1987.21	1.34254	0.0171658	1.35971	56.0822
116.5	I18	7.80903e+06	42373.1	156448	848.912	1.35142	0.00733301	1.35875	56.0426
122.917	I19	7.86506e+06	67357.1	157571	1349.45	1.36111	0.0116567	1.37277	56.6209
130.033	I20	7.89941e+06	-12738.7	158259	-255.209	1.36706	-0.00220453	1.36485	56.2943
136.483	I21	8.07317e+06	29309.2	161740	587.186	1.39713	0.00507219	1.4022	57.8348
142.883	I22	8.09392e+06	14366.3	162156	287.817	1.40072	0.0024862	1.40321	57.8762
149.333	I23	8.09896e+06	52198.9	162256	1045.77	1.40159	0.00903345	1.41062	58.1822
155.767	I24	8.1939e+06	73012.4	164159	1462.75	1.41802	0.0126354	1.43066	59.0084
162.183	I25	8.19729e+06	-5084.19	164226	-101.858	1.41861	-0.000879861	1.41773	58.4752
168.583	I26	8.28095e+06	-11319.2	165902	-226.771	1.43309	-0.00195888	1.43113	59.0278
174.983	I27	8.26723e+06	-17271.4	165628	-346.02	1.43071	-0.00298896	1.42772	58.8874
181.417	I28	8.32083e+06	52633.6	166701	1054.47	1.43999	0.00910867	1.4491	59.769
187.817	I29	8.38936e+06	28382.7	168074	568.625	1.45185	0.00491185	1.45676	60.085
194.983	I30	8.39803e+06	-7913.23	168248	-158.536	1.45335	-0.00136945	1.45198	59.8879
201.4	I31	8.45409e+06	20248.6	169371	405.665	1.46305	0.00350419	1.46655	60.489
207.833	I32	8.45125e+06	35396	169314	709.131	1.46256	0.00612556	1.46868	60.5769
214.25	I33	8.48134e+06	44172.5	169917	884.963	1.46776	0.00764441	1.47541	60.8543
220.65	I34	8.52299e+06	47136.6	170752	944.346	1.47497	0.00815738	1.48313	61.1728
227.05	I35	8.5484e+06	26641.1	171261	533.735	1.47937	0.00461046	1.48398	61.2078
233.467	I36	8.54296e+06	24773.2	171152	496.312	1.47843	0.0042872	1.48272	61.1557
239.867	I37	8.59294e+06	27781.1	172153	556.573	1.48708	0.00480774	1.49189	61.5339
246.3	I38	8.5684e+06	26248.4	171661	525.867	1.48283	0.0045425	1.48737	61.3478
252.7	I39	8.64891e+06	11989.8	173274	240.207	1.49676	0.00207494	1.49884	61.8207
259.9	I40	8.64605e+06	47223.8	173217	946.092	1.49627	0.00817246	1.50444	62.0517
266.317	I41	8.64775e+06	30247.7	173251	605.99	1.49656	0.00523462	1.5018	61.9427			Rh concentration
272.75	I42	8.70757e+06	25929.4	174449	519.476	1.50692	0.0044873	1.5114	62.3389			actual weight (g)	0.0132
279.15	I43	8.72957e+06	10914.7	174890	218.668	1.51072	0.00188888	1.51261	62.3887			MW RhHCO(PPh3)3 (g/mol)	918.78
285.567	I44	8.75954e+06	7636.39	175491	152.989	1.51591	0.00132154	1.51723	62.5792			MW Rh(acac)(CO)2 (g/mol)	258.03
291.967	I45	8.75405e+06	-8257.4	175381	-165.431	1.51496	-0.00142901	1.51353	62.4266			Number of mol (n)	5.11568e-05
298.4	I46	8.80473e+06	-16227	176396	-325.096	1.52373	-0.00280822	1.52092	62.7315			actual volume of reaction (L)	0.0211
304.817	I47	8.76898e+06	19965.5	175680	399.993	1.51754	0.00345519	1.521	62.7347			[Rh] (M)	0.00242449
311.25	I48	8.79739e+06	47440	176249	950.425	1.52246	0.00820989	1.53067	63.1336			[Rh] (mM)	2.42449
317.667	I49	8.84451e+06	83763.7	177193	1678.14	1.53061	0.014496	1.54511	63.7292
324.783	I50	8.81277e+06	55998.8	176557	1121.89	1.52512	0.00969105	1.53481	63.3044
331.217	I51	8.89646e+06	29032.8	178234	581.65	1.5396	0.00502436	1.54463	63.7093
337.617	I52	8.86376e+06	30848.7	177579	618.029	1.53395	0.00533861	1.53929	63.4889
344.033	I53	8.87377e+06	51412.2	177779	1030	1.53568	0.0088973	1.54458	63.7071
350.433	I54	8.89809e+06	80011.6	178266	1602.97	1.53989	0.0138467	1.55373	64.0848
356.85	I55	8.90213e+06	98211.3	178347	1967.59	1.54059	0.0169963	1.55758	64.2436
363.283	I56	8.88617e+06	88307.7	178028	1769.18	1.53782	0.0152824	1.55311	64.059			64.8614
369.717	I57	8.94015e+06	42682.7	179109	855.116	1.54717	0.00738659	1.55455	64.1186
376.183	I58	8.95216e+06	93056.2	179350	1864.31	1.54924	0.0161041	1.56535	64.5639
382.6	I59	8.95213e+06	56079.1	179349	1123.5	1.54924	0.00970495	1.55894	64.2997
389.7	I60	8.96628e+06	71794.1	179633	1438.34	1.55169	0.0124246	1.56411	64.5129
396.083	I61	8.95581e+06	34641.3	179423	694.012	1.54988	0.00599496	1.55587	64.173
402.5	I62	8.97003e+06	111775	179708	2239.33	1.55234	0.0193436	1.57168	64.8251
408.883	I63	8.96181e+06	147119	179543	2947.42	1.55091	0.0254601	1.57637	65.0187
415.3	I64	8.95885e+06	51879.5	179484	1039.37	1.5504	0.00897817	1.55938	64.3177
421.733	I65	8.99367e+06	95307.2	180181	1909.41	1.55643	0.0164937	1.57292	64.8762
428.133	I66	9.01494e+06	74854.2	180607	1499.65	1.56011	0.0129541	1.57306	64.8821
434.55	I67	9.0113e+06	73950	180534	1481.53	1.55948	0.0127976	1.57228	64.8496
440.967	I68	9.01224e+06	60565.4	180553	1213.38	1.55964	0.0104813	1.57012	64.7608
447.35	I69	9.02367e+06	55360.9	180782	1109.11	1.56162	0.00958065	1.5712	64.8052
454.483	I70	9.0417e+06	79964.9	181143	1602.04	1.56474	0.0138386	1.57858	65.1095
460.883	I71	9.02163e+06	155836	180741	3122.05	1.56127	0.0269686	1.58823	65.5079
467.3	I72	9.0347e+06	93390.3	181003	1871	1.56353	0.0161619	1.57969	65.1555
473.683	I73	8.97184e+06	139233	179744	2789.42	1.55265	0.0240953	1.57675	65.034
480.083	I74	9.06172e+06	55043.7	181545	1102.76	1.5682	0.00952576	1.57773	65.0746
486.483	I75	9.02494e+06	66383.8	180808	1329.95	1.56184	0.0114883	1.57333	64.893
492.9	I76	9.01446e+06	119574	180598	2395.58	1.56003	0.0206933	1.58072	65.1979
499.317	I77	9.05817e+06	116090	181473	2325.78	1.56759	0.0200903	1.58768	65.485
505.733	I78	9.05369e+06	38920.7	181384	779.747	1.56681	0.00673555	1.57355	64.9022
512.15	I79	8.98465e+06	94269.8	180001	1888.62	1.55487	0.0163142	1.57118	64.8045
519.25	I80	9.01653e+06	76270.7	180639	1528.03	1.56038	0.0131993	1.57358	64.9036
525.667	I81	9.05237e+06	123748	181357	2479.19	1.56659	0.0214155	1.588	65.4983
532.1	I82	9.00218e+06	90008.9	180352	1803.26	1.5579	0.0155768	1.57348	64.8992
538.517	I83	9.03436e+06	155875	180996	3122.83	1.56347	0.0269754	1.59044	65.599
544.917	I84	9.04355e+06	119241	181181	2388.91	1.56506	0.0206357	1.5857	65.4031
551.367	I85	9.00111e+06	85787.7	180330	1718.69	1.55772	0.0148463	1.57256	64.8614
557.767	I86	9.01264e+06	94538.1	180561	1894	1.55971	0.0163606	1.57607	65.0062
564.183	I87	9.00381e+06	92739.4	180384	1857.96	1.55818	0.0160493	1.57423	64.9303
570.6	I88	8.9859e+06	166242	180026	3330.53	1.55508	0.0287696	1.58385	65.3271
577	I89	8.99169e+06	148657	180142	2978.24	1.55608	0.0257264	1.58181	65.2429
584.117	I90	9.01869e+06	160668	180683	3218.86	1.56076	0.0278049	1.58856	65.5214
590.55	I91	9.00918e+06	86097.4	180492	1724.9	1.55911	0.0148999	1.57401	64.9212
596.967	I92	9.05069e+06	86606.2	181324	1735.09	1.56629	0.0149879	1.58128	65.2211
603.4	I93	9.03878e+06	88636.9	181085	1775.77	1.56423	0.0153393	1.57957	65.1506
609.817	I94	9.00368e+06	143667	180382	2878.26	1.55816	0.0248627	1.58302	65.2929
616.233	I95	9.01041e+06	140123	180517	2807.26	1.55932	0.0242495	1.58357	65.3156
622.633	I96	9.02043e+06	154808	180717	3101.45	1.56106	0.0267907	1.58785	65.492
629.05	I97	9.03961e+06	107395	181102	2151.58	1.56438	0.0185856	1.58296	65.2905
635.467	I98	8.9886e+06	169798	180080	3401.78	1.55555	0.0293849	1.58493	65.3718
641.867	I99	9.07948e+06	136764	181900	2739.96	1.57128	0.0236681	1.59495	65.7847
649.15	I100	9.0008e+06	100246	180324	2008.35	1.55766	0.0173483	1.57501	64.9624
655.55	I101	9.02379e+06	163744	180785	3280.48	1.56164	0.0283372	1.58998	65.5798
661.967	I102	8.96014e+06	156714	179509	3139.64	1.55062	0.0271206	1.57775	65.0752
668.383	I103	8.98404e+06	138282	179988	2770.38	1.55476	0.0239308	1.57869	65.1142
674.783	I104	9.02162e+06	121800	180741	2440.17	1.56126	0.0210785	1.58234	65.2648
681.233	I105	8.96806e+06	177448	179668	3555.04	1.552	0.0307088	1.5827	65.2798
687.65	I106	9.0116e+06	154980	180541	3104.91	1.55953	0.0268206	1.58635	65.4302
694.067	I107	8.99183e+06	194397	180144	3894.6	1.55611	0.033642	1.58975	65.5704
700.467	I108	8.96072e+06	171181	179521	3429.49	1.55073	0.0296243	1.58035	65.1827
706.9	I109	9.00482e+06	184799	180405	3702.3	1.55836	0.0319809	1.59034	65.5946
714.017	I110	8.93796e+06	176313	179065	3532.3	1.54679	0.0305124	1.5773	65.0568
720.417	I111	8.94635e+06	202154	179233	4050.01	1.54824	0.0349844	1.58322	65.3012
726.85	I112	8.99009e+06	209267	180110	4192.5	1.55581	0.0362153	1.59202	65.6641
733.267	I113	8.95302e+06	168471	179367	3375.18	1.54939	0.0291552	1.57855	65.1083
739.683	I114	8.95804e+06	181566	179467	3637.54	1.55026	0.0314215	1.58168	65.2376
746.1	I115	8.99367e+06	196951	180181	3945.77	1.55643	0.034084	1.59051	65.6018
752.483	I116	8.9233e+06	142898	178771	2862.86	1.54425	0.0247297	1.56898	64.7137
758.9	I117	8.96312e+06	174672	179569	3499.42	1.55114	0.0302284	1.58137	65.2247
765.3	I118	8.96322e+06	187522	179571	3756.85	1.55116	0.0324521	1.58361	65.3171
771.717	I119	8.95409e+06	189685	179388	3800.19	1.54958	0.0328265	1.5824	65.2674
778.833	I120	8.94e+06	239837	179106	4804.94	1.54714	0.0415057	1.58864	65.5248
785.25	I121	8.92235e+06	187933	178752	3765.09	1.54408	0.0325233	1.57661	65.0283
791.65	I122	8.92145e+06	241522	178734	4838.71	1.54393	0.0417973	1.58573	65.4044
798.083	I123	8.93344e+06	225375	178975	4515.21	1.54601	0.0390029	1.58501	65.3748
804.467	I124	8.91561e+06	161417	178617	3233.87	1.54292	0.0279346	1.57085	64.7909
810.867	I125	8.9219e+06	196115	178743	3929.02	1.54401	0.0339394	1.57795	65.0835
817.267	I126	8.9518e+06	176614	179342	3538.33	1.54918	0.0305646	1.57975	65.1578
823.65	I127	8.90809e+06	189288	178467	3792.24	1.54162	0.0327579	1.57438	64.9362
830.067	I128	8.92238e+06	219616	178753	4399.83	1.54409	0.0380063	1.5821	65.2547
836.533	I129	8.90559e+06	246651	178417	4941.47	1.54118	0.042685	1.58387	65.3278
843.8	I130	8.91374e+06	223576	178580	4479.18	1.5426	0.0386917	1.58129	65.2213
850.267	I131	8.90598e+06	240606	178425	4820.36	1.54125	0.0416389	1.58289	65.2875
856.667	I132	8.94516e+06	210729	179210	4221.79	1.54803	0.0364683	1.5845	65.3539
863.083	I133	8.93325e+06	177473	178971	3555.53	1.54597	0.0307131	1.57669	65.0315
869.517	I134	8.85186e+06	198784	177340	3982.48	1.53189	0.0344012	1.56629	64.6027
875.95	I135	8.86019e+06	247519	177507	4958.86	1.53333	0.0428352	1.57616	65.01
882.4	I136	8.88826e+06	204770	178070	4102.4	1.53819	0.035437	1.57362	64.9052
888.8	I137	8.84144e+06	286737	177131	5744.55	1.53008	0.0496222	1.57971	65.1561
895.2	I138	8.89319e+06	248597	178168	4980.45	1.53904	0.0430218	1.58206	65.2532
901.617	I139	8.87519e+06	237205	177808	4752.21	1.53592	0.0410502	1.57697	65.0434
908.733	I140	8.85927e+06	239805	177489	4804.31	1.53317	0.0415002	1.57467	64.9484
915.15	I141	8.88322e+06	272234	177969	5454	1.53731	0.0471123	1.58443	65.3508
921.567	I142	8.89444e+06	281980	178193	5649.24	1.53925	0.0487988	1.58805	65.5004
927.983	I143	8.87494e+06	205390	177803	4114.84	1.53588	0.0355444	1.57142	64.8145
934.417	I144	8.88359e+06	290451	177976	5818.96	1.53738	0.0502649	1.58764	65.4834
940.833	I145	8.86589e+06	234152	177621	4691.06	1.53431	0.0405219	1.57484	64.9552
947.25	I146	8.87973e+06	247625	177899	4960.99	1.53671	0.0428536	1.57956	65.1502
953.667	I147	8.85686e+06	233574	177440	4679.48	1.53275	0.0404219	1.57317	64.8866
960.083	I148	8.86004e+06	256186	177504	5132.5	1.5333	0.0443351	1.57764	65.0708
966.483	I149	8.87617e+06	284920	177827	5708.16	1.53609	0.0493078	1.5854	65.391
973.583	I150	8.84878e+06	289226	177278	5794.43	1.53135	0.050053	1.58141	65.2262
980	I151	8.84422e+06	238797	177187	4784.12	1.53056	0.0413258	1.57189	64.8337
986.433	I152	8.87635e+06	267835	177831	5365.87	1.53612	0.046351	1.58248	65.2703
992.833	I153	8.84542e+06	250291	177211	5014.38	1.53077	0.0433149	1.57409	64.9243
999.25	I154	8.85049e+06	281894	177313	5647.52	1.53165	0.048784	1.58043	65.1861
1005.65	I155	8.84148e+06	282663	177132	5662.95	1.53009	0.0489172	1.57901	65.1273
1012.05	I156	8.85006e+06	265744	177304	5323.99	1.53157	0.0459892	1.57756	65.0677
1018.5	I157	8.8552e+06	298660	177407	5983.42	1.53246	0.0516855	1.58415	65.3394
1024.93	I158	8.80409e+06	312175	176383	6254.19	1.52362	0.0540244	1.57764	65.0711
1031.33	I159	8.84682e+06	244649	177239	4901.35	1.53101	0.0423385	1.57335	64.894
1038.57	I160	8.83086e+06	281566	176920	5640.97	1.52825	0.0487274	1.57698	65.0437
1045	I161	8.84794e+06	279832	177262	5606.22	1.53121	0.0484272	1.57964	65.1532
1051.42	I162	8.79822e+06	290030	176266	5810.54	1.5226	0.0501921	1.5728	64.8711
1057.83	I163	8.79815e+06	295213	176264	5914.36	1.52259	0.051089	1.57368	64.9076
1064.27	I164	8.82053e+06	318715	176713	6385.21	1.52647	0.0551563	1.58162	65.2351
1070.67	I165	8.842e+06	297431	177143	5958.81	1.53018	0.0514729	1.58165	65.2364

## Sheet: Phosphorus
time [min]:	Peak name	internal standard #1	OPPh3	PPh3	A/B		[PPh3]	[OPPh3]	A/B		total phosphorus		when phosphorus source is PPH3
0.0166667	I0	1.23225e+08	-340896	4.11593e+07	1.60094e+06		10.1655	-0.0398095	0.0500157		10.2257
6.46667	I1	1.2609e+08	273791	4.39708e+07	2.96221e+06		10.6132	0.0312466	0.0904412		10.8253		INTERNAL REFERENCE (CF SPECTRUM)			FLOW CALIBRATION
12.9167	I2	1.28009e+08	1.19818e+06	5.16496e+07	1.45725e+07		12.2796	0.134693	0.43825		13.2908		Triphenylphosphine mass (g)	0.1318			Triphenylphosphosphate	Peak 1	Peak 2	Peak 3
19.3333	I3	1.29298e+08	2.99516e+06	5.72367e+07	21940294		13.4723	0.333344	0.653251		15.1122		Triphenylphosphine n (moles)	0.000502497		0 mL/min	5.70293e+07	7.98011e+07	3.48921e+06	1.26911e+07	2720052
25.7333	I4	133999526	2.79316e+06	6.66924e+07	2.97028e+07		15.1472	0.299956	0.853343		17.1539		Reaction Volume (L)	0.0224		4 mL/min	1.74532e+07	1.0222e+07	945257	6.42578e+06	1.02344e+06
32.1333	I5	1.36417e+08	4.48531e+06	6.98693e+07	3.48969e+07		15.5876	0.47314	0.984803		18.0303		Triphenylphosphine concentration (M)	0.0224329		CF	3.26756	7.80679	3.69128	1.97502	3.32
38.5333	I6	1.36412e+08	3.43718e+06	7.66342e+07	3.57576e+07		17.0974	0.362588	1.00913		19.4782		Triphenylphosphine concentration (mM)	22.4329			internal standard			#	acyl cpmplex
44.95	I7	1.34493e+08	3.59655e+06	7.78573e+07	4.01297e+07		17.6181	0.384813	1.14867		20.3002
51.35	I8	1.31454e+08	3.76623e+06	7.8988e+07	4.34045e+07		18.2872	0.412285	1.27113		21.2418
57.75	I9	1.27722e+08	3.1111e+06	7.85552e+07	4.45441e+07		18.7185	0.350521	1.34263		21.7542		[Triphenylphosphate] ACTUAL EXPERIMENT
64.9333	I10	1.29372e+08	4.33471e+06	7.59616e+07	4.76417e+07		17.8695	0.482151	1.41767		21.187		Triphenylphosphate mass (g)	0.0931
71.3667	I11	1.28743e+08	3.96651e+06	7.51792e+07	4.63616e+07		17.7719	0.443352	1.38632		20.9879		Triphenylphosphate n (moles)	0.000285338
77.8	I12	1.2823e+08	3.78975e+06	75383696	4.80186e+07		17.8915	0.425289	1.44161		21.2		Reaction Volume (L)	0.0224
84.25	I13	1.28893e+08	4.94796e+06	7.54882e+07	4.68689e+07		17.8241	0.552408	1.39986		21.1763		Triphenylphosphate concentration (M)	0.0127383
90.6667	I14	1.31334e+08	4.64658e+06	7.54443e+07	4.74609e+07		17.4827	0.50912	1.3912		20.7743		Triphenylphosphate concentration (mM)	12.7383
97.0667	I15	1.3643e+08	4.24065e+06	7.38359e+07	4.89585e+07		16.471	0.447289	1.3815		19.6812
103.567	I16	1.40694e+08	3.95774e+06	7.49859e+07	4.7522e+07		16.2205	0.404795	1.30031		19.2259
109.983	I17	1.43334e+08	3944949	7.65467e+07	4.88555e+07		16.2532	0.396057	1.31219		19.2736
116.417	I18	1.43965e+08	4.90111e+06	7.66224e+07	4.90357e+07		16.1979	0.489895	1.31125		19.3103
122.817	I19	1.41854e+08	4.77404e+06	7.58638e+07	5.00318e+07		16.2761	0.484292	1.35779		19.476
129.95	I20	1.2994e+08	5.45298e+06	7.50368e+07	4.91754e+07		17.5748	0.603886	1.45691		21.0925
136.383	I21	1.30746e+08	4886311	7.53205e+07	5.0451e+07		17.5325	0.537795	1.4855		21.0413		when phosphorus source is RhHCOPPh33
142.8	I22	1.31749e+08	4.64053e+06	7.5245e+07	4.98245e+07		17.3816	0.506856	1.45588		20.8003
149.233	I23	1.32144e+08	4.75345e+06	7.50488e+07	5.14323e+07		17.2845	0.517637	1.49837		20.7988		Rh concentration
155.667	I24	1.32486e+08	4468561	7.44087e+07	5.03292e+07		17.0928	0.485356	1.46244		20.503		actual weight (g)	0.0133
162.083	I25	133294060	5.28667e+06	7.51876e+07	5.12222e+07		17.167	0.570737	1.47937		20.6965		MW RhHCO(PPh3)3 (g/mol)	918.78
168.483	I26	1.33299e+08	4.87517e+06	75066786	5.18546e+07		17.1388	0.526293	1.49758		20.6603		MW Rh(acac)(CO)2 (g/mol)	258.03
174.9	I27	1.34911e+08	4.78934e+06	7.58312e+07	5.071e+07		17.1064	0.510848	1.44702		20.5113		Number of mol (n)	5.15444e-05
181.333	I28	1.35218e+08	5.40332e+06	7.43653e+07	5.27345e+07		16.7377	0.575029	1.50137		20.3154		actual volume of reaction (L)	0.0211
187.717	I29	1.34534e+08	4.72472e+06	7.47336e+07	5.2166e+07		16.9061	0.505367	1.49274		20.3969		[Rh] (M)	0.00244286
194.883	I30	1.35463e+08	4.69337e+06	7.57297e+07	5.15465e+07		17.014	0.498574	1.4649		20.4424		[Rh] (mM)	2.44286
201.333	I31	1.3583e+08	4.43487e+06	7.39879e+07	5.23748e+07		16.5777	0.469838	1.48442		20.0164
207.733	I32	134910703	5.38841e+06	7.68425e+07	5.39153e+07		17.3347	0.57475	1.53849		20.9864
214.15	I33	1.36769e+08	5.35662e+06	7.6812e+07	52122942		17.0923	0.563595	1.46714		20.5902
220.55	I34	1.35976e+08	4.94959e+06	7.59567e+07	5.24593e+07		17.0006	0.523806	1.48522		20.4948
226.967	I35	1.36318e+08	5.13253e+06	7.50003e+07	5.3911e+07		16.7443	0.541803	1.52248		20.3311
233.367	I36	1.36621e+08	5.07612e+06	7.55672e+07	5.29806e+07		16.8336	0.534661	1.4929		20.354
239.783	I37	1.37296e+08	6217976	7.62519e+07	5.21447e+07		16.9026	0.651713	1.46212		20.4786
246.2	I38	1.36181e+08	4.58343e+06	7.41644e+07	5.42154e+07		16.5745	0.484327	1.53263		20.1241
252.617	I39	1.3612e+08	4.11246e+06	74679762	5.47845e+07		16.6971	0.434754	1.54941		20.2306
259.8	I40	1.35536e+08	5.47235e+06	7.70336e+07	5.38163e+07		17.2976	0.58101	1.52858		20.9357
266.233	I41	1.355e+08	5509266	7.64456e+07	5.35902e+07		17.1702	0.585087	1.52257		20.8004
272.667	I42	1.3517e+08	6.40887e+06	7.52929e+07	5.50012e+07		16.9525	0.682286	1.56647		20.7678
279.067	I43	1.35261e+08	6.30774e+06	7.51209e+07	5.41956e+07		16.9024	0.671068	1.54249		20.6585
285.467	I44	1.34753e+08	5.68991e+06	7.62209e+07	5.43475e+07		17.2145	0.607617	1.55264		20.9274
291.9	I45	1.35001e+08	5.24366e+06	7.61967e+07	53322075		17.1775	0.558937	1.52055		20.7775
298.317	I46	1.35186e+08	5.459e+06	7.57578e+07	5.4602e+07		17.0552	0.581094	1.55492		20.7461
304.733	I47	133763457	5.7839e+06	7.61226e+07	5.56664e+07		17.3195	0.622225	1.60209		21.1459
311.167	I48	1.33797e+08	4.87603e+06	7.59118e+07	5.60695e+07		17.2673	0.524428	1.61329		21.0183
317.583	I49	1.33494e+08	5.95963e+06	7.61602e+07	5.47167e+07		17.3631	0.642425	1.57793		21.1614
324.717	I50	134144833	6.82214e+06	7.61617e+07	5.46211e+07		17.2792	0.731831	1.56753		21.1461
331.117	I51	1.33221e+08	5.61736e+06	7.5746e+07	5.50424e+07		17.304	0.606769	1.59058		21.0919
337.533	I52	1.33876e+08	5.87564e+06	7.4967e+07	55347529		17.0423	0.631562	1.59157		20.857
343.95	I53	1.33309e+08	5.07175e+06	7.71988e+07	5.60501e+07		17.6243	0.547473	1.61863		21.409
350.35	I54	1.33726e+08	5.76268e+06	7.50331e+07	5.45984e+07		17.0764	0.620116	1.57179		20.8401
356.8	I55	1.33523e+08	6.23758e+06	7.64437e+07	5.68017e+07		17.4239	0.672238	1.6377		21.3715
363.217	I56	1.3305e+08	5.59386e+06	7.65239e+07	5.51274e+07		17.5042	0.605008	1.59508		21.2994
369.667	I57	133177469	5.2088e+06	7.62135e+07	5.75103e+07		17.4165	0.562823	1.66243		21.3042
376.1	I58	1.33729e+08	6.04559e+06	7.63445e+07	5.58776e+07		17.3745	0.650546	1.60858		21.2422
382.5	I59	1.34059e+08	5.82422e+06	77030465	5.42795e+07		17.4874	0.62518	1.55872		21.23
389.6	I60	1.33273e+08	6.35517e+06	7.77024e+07	5.46009e+07		17.744	0.686197	1.5772		21.5846
402.4	I61	1.33777e+08	6.50468e+06	7.56868e+07	5.57688e+07		17.2186	0.699695	1.60487		21.1281
408.8	I62	1.33038e+08	6.25955e+06	7.50299e+07	5.68919e+07		17.164	0.677065	1.64628		21.1336
415.233	I63	1.33129e+08	6.74195e+06	7.73395e+07	5.63085e+07		17.6803	0.728748	1.62829		21.6656
421.633	I64	1.33515e+08	5.95782e+06	7.78756e+07	5.52778e+07		17.7514	0.642129	1.59386		21.5812
428.067	I65	1.3328e+08	6.46433e+06	7.86464e+07	5.51192e+07		17.9587	0.697948	1.59209		21.8408
434.467	I66	1.33431e+08	6.47722e+06	7.67692e+07	5.59972e+07		17.5101	0.698548	1.61562		21.4399
440.867	I67	1.33122e+08	6.44518e+06	7.67041e+07	5.71069e+07		17.5359	0.696706	1.65146		21.5356
447.283	I68	1.32692e+08	5.72048e+06	7.56389e+07	5.82193e+07		17.3485	0.620374	1.68909		21.3471
454.4	I69	1.3337e+08	5.97782e+06	7.81703e+07	5.5575e+07		17.8379	0.644983	1.60417		21.6912
460.783	I70	1.33607e+08	5.87431e+06	7.59556e+07	5.68092e+07		17.3018	0.632692	1.63689		21.2083
467.183	I71	1.32365e+08	5.7434e+06	7.62873e+07	5.59776e+07		17.5403	0.624393	1.62806		21.4208
473.583	I72	132614549	6.12241e+06	7.75308e+07	5.69773e+07		17.7928	0.664348	1.65402		21.7651
479.983	I73	1.33927e+08	6.63095e+06	7.79176e+07	55738133		17.7063	0.712479	1.60219		21.6231
486.4	I74	1.33258e+08	6.97789e+06	7.72058e+07	5.71717e+07		17.6326	0.753522	1.65165		21.6895
492.817	I75	1.33237e+08	6.00934e+06	7.72513e+07	5.64077e+07		17.6458	0.649031	1.62983		21.5545
499.217	I76	1.33023e+08	6.95331e+06	7.69628e+07	5.71977e+07		17.6082	0.752193	1.65532		21.671
505.633	I77	1.3331e+08	7.25712e+06	7.66103e+07	57116933		17.4898	0.783367	1.64942		21.572
512.05	I78	1.33536e+08	6.93095e+06	7.82614e+07	5.61709e+07		17.8366	0.746896	1.61936		21.8222
519.15	I79	1.32831e+08	6.55454e+06	7.70449e+07	5.68437e+07		17.6525	0.71008	1.64745		21.6575
525.567	I80	1.33462e+08	6.65877e+06	7.61647e+07	5.73195e+07		17.3683	0.717962	1.65339		21.393
532	I81	1.32986e+08	7.09164e+06	7.69146e+07	5.70099e+07		17.6021	0.767372	1.65035		21.6702
538.417	I82	1.32996e+08	6.77448e+06	7.63043e+07	5.75855e+07		17.461	0.732995	1.66688		21.5278
544.85	I83	1.34529e+08	6.69436e+06	7.81608e+07	57575363		17.6821	0.716073	1.6476		21.6933
551.267	I84	1.32998e+08	6.77218e+06	7.78693e+07	5.77268e+07		17.8189	0.732735	1.67094		21.8935
557.667	I85	132873607	6.95636e+06	7.67532e+07	5.61804e+07		17.58	0.753369	1.62771		21.5887
564.1	I86	1.33716e+08	7.70147e+06	7.67371e+07	5.7109e+07		17.4656	0.828811	1.64419		21.5828
570.5	I87	1.34098e+08	7.47703e+06	7.68387e+07	5.77706e+07		17.4389	0.802365	1.6585		21.5582
576.9	I88	1.34213e+08	7.01482e+06	7.86873e+07	5.79842e+07		17.8431	0.752117	1.6632		21.9216
584.033	I89	1.34277e+08	6.10847e+06	7.81464e+07	56067115		17.712	0.654629	1.60745		21.5815
590.45	I90	133509945	6.68357e+06	7.85094e+07	56412583		17.8965	0.720376	1.62664		21.8702
596.867	I91	1.33214e+08	6.78584e+06	7.87231e+07	5.68617e+07		17.9851	0.733025	1.64324		22.0046
603.3	I92	1.34026e+08	7.23587e+06	7.84574e+07	5.66977e+07		17.8157	0.7769	1.62857		21.8498
609.717	I93	1.33898e+08	7.3497e+06	7.75485e+07	5.82881e+07		17.6263	0.789881	1.67586		21.7679
616.133	I94	1.33915e+08	7.61371e+06	7.85102e+07	5.67543e+07		17.8426	0.818149	1.63155		21.9239
622.55	I95	1.34247e+08	7.80869e+06	7.72132e+07	5.7123e+07		17.5044	0.837025	1.63809		21.6176
628.95	I96	1.33719e+08	7.80403e+06	7.75969e+07	5.59691e+07		17.6609	0.839828	1.61133		21.7233
635.367	I97	1.33771e+08	7.10725e+06	7.70639e+07	5.75635e+07		17.5327	0.764547	1.65659		21.6105
641.833	I98	1.33713e+08	7.07081e+06	7.68753e+07	5.61e+07		17.4974	0.760959	1.61518		21.4888
649.05	I99	1.33649e+08	6.93905e+06	7.8273e+07	5.66062e+07		17.824	0.747133	1.63053		21.8322
655.45	I100	134438236	7.06786e+06	7.82024e+07	5.65641e+07		17.7034	0.756536	1.61975		21.6995
661.883	I101	1.33503e+08	6.05485e+06	7.77402e+07	5.68662e+07		17.7221	0.652645	1.63981		21.6544
668.283	I102	1.33896e+08	8.13043e+06	7.70563e+07	5.75383e+07		17.5146	0.873796	1.65432		21.697
674.717	I103	1.33127e+08	7528989	7.91893e+07	5.5366e+07		18.1033	0.813829	1.60105		22.1193
681.133	I104	1.34395e+08	7.49533e+06	7.73238e+07	5.72899e+07		17.5101	0.802549	1.64106		21.5948
687.567	I105	1.33396e+08	7.85624e+06	7.89458e+07	5.69214e+07		18.0114	0.847496	1.64272		22.1443
693.967	I106	1.33604e+08	7.66126e+06	7.85937e+07	5.65659e+07		17.9031	0.825175	1.62992		21.9882
700.4	I107	1.34202e+08	7.13846e+06	7.808e+07	5.6592e+07		17.7068	0.765436	1.6234		21.719
706.817	I108	134136341	7.58369e+06	77667608	5.61406e+07		17.6219	0.813577	1.61124		21.658
713.917	I109	1.33934e+08	7.5562e+06	7.81275e+07	5.7267e+07		17.7531	0.811855	1.64606		21.8571
720.333	I110	134922919	7.95004e+06	7.91211e+07	5.67473e+07		17.8471	0.847906	1.61916		21.9333
726.767	I111	1.33881e+08	8.84626e+06	7.83088e+07	5.58377e+07		17.8013	0.950835	1.6056		21.9633
733.183	I112	1.3413e+08	7.97962e+06	7.89042e+07	5.63344e+07		17.9033	0.856091	1.61688		21.9931
739.6	I113	1.34408e+08	8.01113e+06	7.84678e+07	5.56652e+07		17.7675	0.857696	1.59437		21.8139
746	I114	1.33695e+08	7.86879e+06	7.7599e+07	5.66751e+07		17.6645	0.846948	1.63195		21.7753
752.4	I115	1.33749e+08	8.31141e+06	7.836e+07	5.71753e+07		17.8305	0.894227	1.64569		22.0161
758.8	I116	1.34001e+08	7.21583e+06	7.75133e+07	5.76473e+07		17.6047	0.774895	1.65616		21.6919
765.217	I117	1.3406e+08	8.20083e+06	7.77204e+07	5.49491e+07		17.6439	0.880282	1.57794		21.6801
771.617	I118	1.34442e+08	6.95203e+06	7.91639e+07	5.62395e+07		17.9207	0.744119	1.61042		21.8856
778.75	I119	134640080	8.59908e+06	7.8964e+07	5.75147e+07		17.849	0.919056	1.6445		22.0571
785.15	I120	1.3413e+08	7.25536e+06	7.8252e+07	5.62345e+07		17.7554	0.778391	1.61402		21.7618
791.583	I121	1.34566e+08	7876233	78566837	5.79759e+07		17.7691	0.842265	1.65861		21.9286
797.983	I122	1.34751e+08	7509533	7.86061e+07	57542893		17.7535	0.801947	1.64396		21.8434
804.367	I123	1.34323e+08	7.7031e+06	7.89819e+07	5.51838e+07		17.8952	0.825236	1.58158		21.8835
810.783	I124	1.3459e+08	7.92083e+06	7.83641e+07	56901598		17.72	0.846879	1.62757		21.822
817.167	I125	1.34829e+08	7.6916e+06	7.88646e+07	5.6681e+07		17.8016	0.820916	1.6184		21.8593
823.567	I126	1.34112e+08	8271066	7.88445e+07	5.76718e+07		17.8923	0.887482	1.65549		22.0907
830.033	I127	1.34882e+08	7585440	7.92107e+07	5.69209e+07		17.8728	0.809269	1.62461		21.9312
836.45	I128	1.34552e+08	8922645	7.94063e+07	5.688e+07		17.9608	0.954261	1.62742		22.1698
843.75	I129	1.35973e+08	8.21973e+06	7.87491e+07	5.59645e+07		17.626	0.869901	1.58449		21.6649
850.167	I130	1.3617e+08	8.22184e+06	7.89463e+07	5.63384e+07		17.6446	0.868867	1.59278		21.699
856.583	I131	1.35697e+08	8.29389e+06	7.92838e+07	5.50335e+07		17.7818	0.879536	1.56131		21.7839
863	I132	1.36574e+08	8.08289e+06	78796514	5.66818e+07		17.559	0.851656	1.59774		21.6062
869.433	I133	1.34866e+08	7759040	7.94687e+07	5.71707e+07		17.9331	0.827887	1.63193		22.0249
875.883	I134	1.35038e+08	8.59401e+06	7.84844e+07	5.69088e+07		17.6884	0.915809	1.62239		21.849
882.3	I135	1.35683e+08	7.27377e+06	7.8827e+07	5.52824e+07		17.6811	0.771432	1.56852		21.5896
888.7	I136	1.36266e+08	8.01074e+06	81017627	5.67447e+07		18.0948	0.845962	1.60313		22.147
895.117	I137	1.36255e+08	8.51301e+06	7.86808e+07	5.70906e+07		17.5742	0.89907	1.61302		21.6993
901.533	I138	1.35888e+08	7.94058e+06	7.96689e+07	5.61035e+07		17.843	0.840884	1.58942		21.8628
908.633	I139	1.35971e+08	8083963	8.04608e+07	5.58755e+07		18.0094	0.855546	1.582		22.0289
915.067	I140	1.35902e+08	7.32675e+06	7.98929e+07	5.49624e+07		17.8913	0.775801	1.55694		21.781
921.483	I141	1.36207e+08	8.64602e+06	7.93755e+07	5.71115e+07		17.7356	0.913439	1.61418		21.8774
927.883	I142	1.36995e+08	8.22379e+06	7.94234e+07	5.52834e+07		17.6442	0.863835	1.55353		21.6151
934.317	I143	1.35186e+08	8459491	7.8013e+07	5.67267e+07		17.5628	0.900484	1.61542		21.6941
940.733	I144	1.35556e+08	8306241	7.9334e+07	5.59234e+07		17.8115	0.881756	1.58819		21.8696
947.15	I145	1.35498e+08	9.186e+06	7.96584e+07	54589425		17.8919	0.975566	1.55097		21.9695
953.583	I146	1.3519e+08	8.42606e+06	7.96739e+07	5.437e+07		17.9363	0.896901	1.54827		21.9297
959.983	I147	1.35729e+08	9116499	8.02383e+07	5.54718e+07		17.9915	0.966539	1.57336		22.1048
966.383	I148	1.35719e+08	8.18977e+06	8.09359e+07	5.6028e+07		18.1493	0.86835	1.58925		22.1962
973.483	I149	1.35502e+08	8844387	8.0752e+07	5.47166e+07		18.1371	0.93926	1.55454		22.1854
979.917	I150	1.356e+08	8.93482e+06	7.88458e+07	5.48842e+07		17.6962	0.948181	1.55818		21.7607
986.333	I151	1.35708e+08	8238550	8.01671e+07	5.59843e+07		17.9784	0.873596	1.58815		22.0283
992.75	I152	1.3614e+08	8.99744e+06	7.89513e+07	5.57947e+07		17.6496	0.951038	1.57775		21.7561
999.15	I153	1.36431e+08	8.85028e+06	7.92293e+07	56004835		17.6739	0.933486	1.58031		21.768
1005.55	I154	1.36365e+08	8.39503e+06	7.95151e+07	5.59064e+07		17.7463	0.8859	1.5783		21.7888
1011.97	I155	1.36202e+08	8.71921e+06	7.90179e+07	5.60927e+07		17.6564	0.921209	1.58545		21.7485
1018.42	I156	1.35913e+08	8.71265e+06	7.89707e+07	5.55488e+07		17.6833	0.92247	1.57341		21.7526
1024.83	I157	1.35876e+08	8.72985e+06	7.87092e+07	5.68904e+07		17.6296	0.924545	1.61185		21.7778
1031.25	I158	1.35861e+08	8.28285e+06	7.99651e+07	5.57213e+07		17.9129	0.877302	1.5789		21.948
1038.48	I159	1.36379e+08	8741234	7.96297e+07	5.54652e+07		17.77	0.922336	1.56568		21.8237
1044.92	I160	1.37051e+08	8.32062e+06	8.00485e+07	5.51676e+07		17.7758	0.873648	1.54964		21.7487
1051.32	I161	1.36564e+08	8.56222e+06	8.02413e+07	55366148		17.8822	0.902221	1.56076		21.9059
1057.77	I162	1.37036e+08	8.78984e+06	8.14498e+07	5.63743e+07		18.089	0.923019	1.58371		22.1795
1064.17	I163	1.36985e+08	9.48293e+06	8.02543e+07	5.55752e+07		17.8301	0.996167	1.56184		21.95
1070.58	I164	1.36566e+08	8.7173e+06	8.01441e+07	5.64695e+07		17.8603	0.918551	1.59185		21.9625
