# Supplementary material for: Mapping catalyst activation, turnover speciation and deactivation in Rh/PPh3-catalysed olefin hydroformylation
Source: Royal Society of Chemistry journal article supplement (doi:10.1039/d2cy00312k), 2022-01-01
Supplement: d2cy00312k7.xlsx [file d2cy00312k7.xlsx]

## Sheet: Proton
time [min]:	Peak name	1-hexene #1	1-heptanal #1	2-methylhexanal #1	Hydrogen #2	TMB aromatic #3	TMB methyl #9	1-hexene (other H double bond)	[1-hexene]	[1-heptanal]	[2-methylhexanal]	Hydrogen]	[TMB aromatic]	[TMB methyl]	[1-hexene (other H double bond)]	Conversion	Regioselectivity n-heptanal	Regioselectivity 2-methylhexanal	PPh3/Rh= 10
0	I0	5.06505e+07	-6094.5	-6965.25	-27253.8	4.89004e+07	1.87758e+08	112301328	534.497	-0.07637	-0.0805386	-0.0302578	108.838	86.5571	540.464	0	48.6717	51.3283	0.948241		INTERNAL REFERENCE			FLOW CALIBRATION
7.2	I1	4.49949e+07	4502.5	-7921	-19199	4.68802e+07	1.84598e+08	1.0209e+08	482.942	0.0573864	-0.0931575	-0.02168	106.127	86.5571	499.728	9.64539	-160.427	260.427	-0.616015		1-hexene Volume (mL)	1.3			1-hexene (initial)	1-hexene (end)	1-heptanal (end)	2-methylhexanal (end)	Hydrogen (end)	TMB aromatic (initial)	TMB methyl (initial)	TMB aromatic (end)	TMB methyl (end)	1-hexene (other H double bond)
14.3333	I2	4.41681e+07	37245.5	814.75	9.3897e+06	4.68291e+07	1.85069e+08	101048553	472.861	0.473502	0.00955774	10.5761	105.742	86.5571	493.373	11.5315	98.0214	1.97858	49.5413		1-hexene n (moles)	0.0104729		0 mL/min	29142933	4176547	20157390	6.62235e+06	1074285	2.00388e+07	62136918	20500117	6.30756e+07	6.17893e+06
21.4333	I3	4.58464e+07	221428	50049.5	9.50306e+06	4.81538e+07	1.88624e+08	1.03717e+08	481.579	2.76197	0.576061	10.5021	106.684	86.5571	496.86	9.9004	82.7425	17.2575	4.79459		Reaction Volume (L)	0.0224		4 mL/min	6.75363e+06	987741	4.8867e+06	1.7202e+06	1.58738e+06	7.57361e+06	3.6012e+07	8.49335e+06	3.78577e+07	1.62179e+06
28.55	I4	45484501	478874	104558	9492494	4.83535e+07	1.88718e+08	1.03763e+08	477.539	5.97022	1.20284	10.4852	107.073	86.5571	496.831	10.6563	83.2312	16.7688	4.96345		1-hexene (M)	0.467541		CF	4.31515	4.22838	4.12495	3.84975	0.676765	2.64587	1.72545	2.41367	1.66612	3.80995
35.6667	I5	4.54121e+07	738218	173554	9.30818e+06	4.87554e+07	1.89544e+08	103673820	474.702	9.16341	1.98788	10.2368	107.493	86.5571	494.24	11.1871	82.1736	17.8264	4.60965		1-hexene(mM)	467.541
43.8333	I6	4.30661e+07	1.00853e+06	236386	9.25341e+06	4.691e+07	1.85247e+08	9.79468e+07	460.62	12.8092	2.77036	10.4126	105.823	86.5571	477.769	13.8216	82.218	17.782	4.62366
51.4	I7	4.24498e+07	1.26007e+06	314747	9.13531e+06	47096872	185914561	97333179	452.398	15.9465	3.67547	10.2428	105.863	86.5571	473.072	15.3599	81.2686	18.7314	4.33862		# is the number of protons of the peak taken for integration			0 mL	static with long delay (flow+ full relaxtion effects)
58.55	I8	4.24837e+07	1511437	358204	9.1842e+06	4.72364e+07	186373092	97150378	451.646	19.0805	4.17265	10.2723	105.916	86.5571	471.021	15.5006	82.0555	17.9445	4.57275		If #>1 the integration will be divided by the number of protons			4 mL	flow with shot delay (flow + poor relaxiation)
65.6667	I9	41801405	1739063	414698	9.15069e+06	47132115	186499114	9.57299e+07	444.092	21.9392	4.82748	10.2279	105.61	86.5571	463.821	16.9139	81.9646	18.0354	4.54466
73.7	I10	44560858	2.15776e+06	526650	9.13648e+06	4.81067e+07	1.8733e+08	100588244	471.308	27.1006	6.1035	10.1667	107.316	86.5571	485.198	11.822	81.6182	18.3818	4.44017						initial CF were calculated under Argon ( the reactor was still no pressurized)
80.8167	I11	4.10915e+07	2.24952e+06	535671	9.02842e+06	4.72107e+07	1.86941e+08	93955861	435.519	28.3119	6.22099	10.0674	105.536	86.5571	454.15	18.5179	81.9853	18.0147	4.55103		INTERNAL REFERENCE STANDARD				final CF were calculated under 10 bar H2/CO ( reactor pressurized)
87.9333	I12	4.09669e+07	2.48215e+06	594004	8993214	47288111	1.86935e+08	9.38464e+07	434.212	31.2407	6.89865	10.0284	105.713	86.5571	453.635	18.7625	81.912	18.088	4.52853		Mass of TMB (g)	0.3261
95.0667	I13	4.06658e+07	2.75393e+06	640772	8.94575e+06	4.73937e+07	1.87256e+08	93170284	430.282	34.6018	7.42904	9.9584	105.767	86.5571	449.594	19.4977	82.3248	17.6752	4.65764		Molecular weight of TMB (g/mol)	168.19
102.217	I14	4.05974e+07	2.98936e+06	708616	8.90645e+06	4.77316e+07	1.87948e+08	9.29289e+07	427.977	37.4217	8.18538	9.87816	106.129	86.5571	446.779	19.929	82.0524	17.9476	4.57178		Moles of TMB (n)	0.00193888
109.35	I15	4.02624e+07	3.20871e+06	758112	8844297	4.74394e+07	1.87431e+08	9.23427e+07	425.615	40.2783	8.78126	9.83626	105.77	86.5571	445.184	20.3708	82.1008	17.8992	4.58685		Reaction Volume (L)	0.0224
116.483	I16	4.02069e+07	3.45035e+06	810819	8.78367e+06	4.75795e+07	187605578	9.20792e+07	424.633	43.2714	9.38304	9.75976	105.984	86.5571	443.502	20.5545	82.18	17.82	4.61166		TMB (M)	0.0865571
123.633	I17	40072836	3696384	885835	8.74874e+06	4.7713e+07	1.87756e+08	9.1695e+07	422.877	46.3196	10.2429	9.71313	106.196	86.5571	441.296	20.8831	81.891	18.109	4.52212		TMB (mM)	86.5571		FLOW CALIBRATION
130.8	I18	3.9725e+07	3.92119e+06	933793	8.71526e+06	4.75469e+07	1.87209e+08	91040722	420.433	49.2805	10.829	9.70427	106.136	86.5571	439.429	21.3403	81.9845	18.0155	4.55077						1-hexene (initial)	1-hexene (end)	1-heptanal (end)	2-methylhexanal (end)	Hydrogen (end)	TMB aromatic (initial)	TMB methyl (initial)	TMB aromatic (end)	TMB methyl (end)	1-hexene (other H double bond)
137.917	I19	3.90636e+07	4.12525e+06	966724	8718466	4.74918e+07	1.87528e+08	8.95267e+07	412.729	51.7567	11.1918	9.69131	105.832	86.5571	431.386	22.7817	82.2207	17.7793	4.6245					0 mL/min	2.78016e+07	7.53593e+06	1.87317e+07	5722346	4.41821e+06	2.16925e+07	6.43757e+07	2.16584e+07	6.12478e+07	1.44223e+07
145.75	I20	4.15301e+07	4.67895e+06	1.1034e+06	8.64094e+06	48150563	187306536	93746400	439.309	58.773	12.7892	9.6165	107.427	86.5571	452.253	17.8089	82.1286	17.8714	4.59552					4 mL/min	6.11977e+06	1757276	3.67838e+06	1.21779e+06	3.89945e+06	7.34342e+06	3.6664e+07	7.98182e+06	3.63252e+07	3.68713e+06
152.867	I21	3.84494e+07	4590139	1070298	8.53116e+06	4.72041e+07	1.86691e+08	8.8085e+07	408.062	57.8476	12.4465	9.52563	105.663	86.5571	426.342	23.655	82.2937	17.7063	4.64771					CF	4.54292	4.28842	5.09238	4.69897	1.13304	2.954	1.75583	2.71347	1.6861	3.91153
160	I22	3.82999e+07	4830818	1.13334e+06	8.4942e+06	4.75013e+07	1.87163e+08	87794652	405.45	60.7272	13.1463	9.46043	106.06	86.5571	423.865	24.1436	82.2043	17.7957	4.61932
167.117	I23	3.80136e+07	5.02544e+06	1.17064e+06	8464781	4.73882e+07	1.87082e+08	8.70983e+07	402.593	63.201	13.5849	9.43175	105.853	86.5571	420.684	24.6781	82.3081	17.6919	4.65231
174.267	I24	38219168	5325904	1.2534e+06	8.47238e+06	4.7692e+07	1.87636e+08	87552594	403.576	66.7822	14.5023	9.41237	106.217	86.5571	421.631	24.4943	82.1585	17.8415	4.60492
181.4	I25	3.77548e+07	5.48659e+06	1.31982e+06	8.4015e+06	4.77236e+07	1.8792e+08	8.65337e+07	398.068	68.6929	15.2477	9.3195	106.127	86.5571	416.094	25.5246	81.8351	18.1649	4.50512
188.533	I26	3.73474e+07	5.71731e+06	1.31926e+06	8375736	4.76375e+07	187836243	8.55029e+07	393.95	71.6136	15.2481	9.29507	105.983	86.5571	411.321	26.2952	82.4455	17.5545	4.69656
195.683	I27	3.7213e+07	5.95956e+06	1378876	8.28973e+06	4.77115e+07	1.87816e+08	8.50927e+07	392.574	74.6559	15.9389	9.20061	106.159	86.5571	409.392	26.5525	82.4064	17.5936	4.68389
202.8	I28	37009613	6.16685e+06	1.41224e+06	8.21659e+06	47414734	1.8713e+08	8.42485e+07	391.86	77.5361	16.3844	9.15289	105.886	86.5571	406.817	26.6861	82.555	17.445	4.73231
209.95	I29	3.67867e+07	6.40569e+06	1452696	8.14036e+06	4.76869e+07	1.87597e+08	8.39235e+07	388.53	80.3384	16.8118	9.04539	106.228	86.5571	404.238	27.3091	82.695	17.305	4.77869
217.8	I30	3.88213e+07	7048156	1.59451e+06	8.18003e+06	4.83781e+07	1.88042e+08	8.73201e+07	409.047	88.1867	18.4093	9.06794	107.513	86.5571	419.603	23.4705	82.7298	17.2702	4.79033
224.933	I31	3.6192e+07	6.80659e+06	1556295	8.12034e+06	4.75465e+07	187419888	8.25785e+07	382.61	85.447	18.0277	9.03166	106.015	86.5571	398.135	28.4167	82.5776	17.4224	4.73975
232.05	I32	3.56989e+07	6.9712e+06	1.61735e+06	8.0841e+06	4.75393e+07	187315831	8.19144e+07	377.607	87.5621	18.7454	8.99634	106.058	86.5571	395.153	29.3528	82.3668	17.6332	4.67113
239.183	I33	35593190	7258517	1.70642e+06	8.06532e+06	47698913	187804248	81663063	375.509	90.9338	19.7263	8.9521	106.138	86.5571	392.916	29.7452	82.174	17.826	4.60977
246.333	I34	3.53437e+07	7.5027e+06	1.76101e+06	8.09571e+06	4.77579e+07	1.87761e+08	81114077	372.963	94.0144	20.362	8.98789	106.293	86.5571	390.364	30.2217	82.1973	17.8027	4.61714
253.45	I35	3.51438e+07	7.74424e+06	1771697	7.93948e+06	4.7588e+07	187268246	8.02097e+07	371.829	97.2965	20.5395	8.83765	106.194	86.5571	387.028	30.4338	82.5694	17.4306	4.73704
260.567	I36	3.47911e+07	7956786	1.85841e+06	7992744	47861450	1.88033e+08	7.99551e+07	366.6	99.5601	21.4571	8.86074	106.369	86.5571	384.23	31.412	82.2694	17.7306	4.63996
267.683	I37	3.56813e+07	8428749	1.92717e+06	7689806	4.89491e+07	1.90528e+08	8.16682e+07	371.057	104.085	21.9598	8.41329	107.362	86.5571	387.323	30.5782	82.5778	17.4222	4.7398
274.817	I38	3.75551e+07	9.0789e+06	2.1276e+06	8.97598e+06	5.07293e+07	194277468	8.58366e+07	383.006	109.95	23.7757	9.63094	109.12	86.5571	399.236	28.3427	82.2205	17.7795	4.62446
281.917	I39	3.84031e+07	9.56332e+06	2.2716e+06	9.11258e+06	52018888	1.97178e+08	8.78395e+07	385.893	114.112	25.0114	9.63366	110.247	86.5571		27.8025	82.0222	17.9778	4.56242
289.817	I40	4.08447e+07	10528831	2.48745e+06	9.23323e+06	52986687	197777982	9.19465e+07	409.182	125.252	27.305	9.7316	111.958	86.5571		23.4453	82.1018	17.8982	4.58715
296.933	I41	37761279	1.00691e+07	2.39807e+06	9.25944e+06	5.19355e+07	1.96783e+08	8.64029e+07	380.205	120.389	26.4569	9.80857	110.292	86.5571		28.8667	81.9832	18.0168	4.55037
304.05	I42	3.69471e+07	10182027	2.41995e+06	9.04092e+06	5.14156e+07	1.96266e+08	8.46217e+07	372.987	122.06	26.7686	9.60232	109.475	86.5571		30.2171	82.0137	17.9863	4.5598
311.183	I43	36499684	1.03019e+07	2402426	8.87042e+06	5.10697e+07	1.9509e+08	83342312	370.691	124.241	26.7349	9.47801	109.394	86.5571		30.6467	82.2919	17.7081	4.64715
318.3	I44	3.55379e+07	1.03191e+07	2.4108e+06	8.07272e+06	5.05169e+07	1.93838e+08	8.14903e+07	363.255	125.252	27.0015	8.6814	108.909	86.5571		32.038	82.2654	17.7346	4.63871
325.417	I45	3.4497e+07	10241884	2386841	7.8862e+06	4.95553e+07	1.91748e+08	7.91551e+07	356.459	125.67	27.0245	8.57326	108	86.5571		33.3095	82.3016	17.6984	4.65022
332.533	I46	33554576	1.02748e+07	2.35316e+06	7.49742e+06	4.87581e+07	190096051	7.68213e+07	349.734	127.169	26.8747	8.22144	107.186	86.5571		34.5676	82.5539	17.4461	4.73193
339.65	I47	3.21603e+07	1.00481e+07	2.33876e+06	7.52163e+06	4.74849e+07	1.87101e+08	7.38624e+07	340.568	126.354	27.1378	8.38003	106.059	86.5571		36.2824	82.3197	17.6803	4.65602
346.767	I48	3.23899e+07	1.03236e+07	2.3878e+06	7746349	4.79491e+07	1.88606e+08	7.4332e+07	340.263	128.783	27.4858	8.56153	106.241	86.5571		36.3396	82.4112	17.5888	4.68544
353.883	I49	31948301	1.04094e+07	2.37403e+06	7.44284e+06	4.76895e+07	1.87479e+08	7.32755e+07	337.64	130.633	27.4915	8.2755	106.3	86.5571		36.8303	82.6141	17.3859	4.75177
361.767	I50	3.35709e+07	1.114e+07	2547894	7.49248e+06	4.81201e+07	1.87291e+08	7.59371e+07	355.145	139.943	29.5345	8.33906	107.368	86.5571		33.5553	82.5732	17.4268	4.73829

## Sheet: Hydride
time [min]:	Peak name	A/B	C	Riv 1	Riv 2	[A/B]	[C]	Sum Hyds	%			1	2												time [min]:	Peak name	1	2
0	I0	-10304.9	-32246.8	-237.314	-742.615	-0.00197039	-0.0060595	-0.00802989	-0.341548	RG Calibration				Flow Calibration											0	I0	-10304.9	-32246.8
7.1	I1	279533	140979	6437.4	3246.63	0.053449	0.0264915	0.0799404	3.40024		Hyd 1	Hyd 2			Hyd1	Hyd 2	1-hexene								7.1	I1	279533	140979
14.2167	I2	4.65934e+06	981940	107301	22613.2	0.890904	0.184517	1.07542	45.7426	CF	0.9894	0.9894		0 mL/min	2.04628e+06	1.05	29142933								14.2167	I2	4.65934e+06	981940
21.3333	I3	7.40123e+06	1.47403e+06	170444	33945.7	1.41518	0.276986	1.69216	71.9755	RG Hyd	203	203		4 mL/min	933902	1.05	6.75363e+06								21.3333	I3	7.40123e+06	1.47403e+06
28.4667	I4	8.063e+06	1.62184e+06	185684	37349.6	1.54171	0.304761	1.84647	78.5391	RG 1H	4.5	4.5		CF	1.05	1.05	4.31515								28.4667	I4	8.063e+06	1.62184e+06
36.5667	I5	8.24912e+06	1.67705e+06	189970	38621.1	1.5773	0.315136	1.89244	80.4941	Int TMB	93824455	9.54712e+07													36.5667	I5	8.24912e+06	1.67705e+06
44.1167	I6	8.18048e+06	1.63398e+06	188389	37629.2	1.56418	0.307042	1.87122	79.5915	[TMB]	86.5571	86.5571													44.1167	I6	8.18048e+06	1.63398e+06
51.3167	I7	8.24657e+06	1.68162e+06	189911	38726.3	1.57681	0.315994	1.89281	80.5098																51.3167	I7	8.24657e+06	1.68162e+06
58.45	I8	8.25864e+06	1.65077e+06	190189	38015.8	1.57912	0.310196	1.88932	80.3614	IRF	45.5944	45.5944													58.45	I8	8.25864e+06	1.65077e+06
65.5667	I9	8.29941e+06	1.69561e+06	191128	39048.4	1.58692	0.318622	1.90554	81.0514																65.5667	I9	8.29941e+06	1.69561e+06
73.6	I10	8.3268e+06	1.65476e+06	191759	38107.7	1.59215	0.310947	1.9031	80.9476																73.6	I10	8.3268e+06	1.65476e+06
80.7	I11	8.32987e+06	1.67541e+06	191830	38583.3	1.59274	0.314827	1.90757	81.1377																80.7	I11	8.32987e+06	1.67541e+06
87.8333	I12	8.29486e+06	1.71285e+06	191024	39445.3	1.58605	0.321861	1.90791	81.1522																87.8333	I12	8.29486e+06	1.71285e+06
94.9667	I13	8.34519e+06	1.70974e+06	192182	39373.9	1.59567	0.321278	1.91695	81.5366																94.9667	I13	8.34519e+06	1.70974e+06
102.117	I14	8.35398e+06	1.71376e+06	192385	39466.4	1.59735	0.322033	1.91938	81.6402																102.117	I14	8.35398e+06	1.71376e+06
109.25	I15	8.32763e+06	1.71517e+06	191778	39498.8	1.59231	0.322297	1.91461	81.4372																109.25	I15	8.32763e+06	1.71517e+06
116.383	I16	8.34178e+06	1.72456e+06	192104	39715.1	1.59502	0.324062	1.91908	81.6273																116.383	I16	8.34178e+06	1.72456e+06
123.533	I17	8.35238e+06	1.71072e+06	192348	39396.4	1.59704	0.321461	1.91851	81.6029																123.533	I17	8.35238e+06	1.71072e+06
130.7	I18	8.32413e+06	1.7301e+06	191698	39842.8	1.59164	0.325104	1.91675	81.5281																130.7	I18	8.32413e+06	1.7301e+06
137.817	I19	8.32749e+06	1.74006e+06	191775	40072.1	1.59229	0.326975	1.91926	81.6351																137.817	I19	8.32749e+06	1.74006e+06
145.65	I20	8.35366e+06	1.75201e+06	192378	40347.3	1.59729	0.329221	1.92651	81.9434																145.65	I20	8.35366e+06	1.75201e+06
152.767	I21	8.29729e+06	1.73845e+06	191080	40035	1.58651	0.326672	1.91318	81.3766																152.767	I21	8.29729e+06	1.73845e+06
159.9	I22	8.33076e+06	1.76029e+06	191850	40538	1.59291	0.330777	1.92369	81.8234																159.9	I22	8.33076e+06	1.76029e+06
167.017	I23	8.27624e+06	1.78195e+06	190595	41036.9	1.58249	0.334848	1.91733	81.5531																167.017	I23	8.27624e+06	1.78195e+06
174.167	I24	8.38434e+06	1.77044e+06	193084	40771.7	1.60316	0.332684	1.93584	82.3402																174.167	I24	8.38434e+06	1.77044e+06
181.3	I25	8.31092e+06	1.78904e+06	191393	41200	1.58912	0.336179	1.9253	81.8918																181.3	I25	8.31092e+06	1.78904e+06
188.45	I26	8.36922e+06	1.78473e+06	192736	41100.9	1.60026	0.33537	1.93563	82.3315																188.45	I26	8.36922e+06	1.78473e+06
195.583	I27	8.35329e+06	1.7922e+06	192369	41272.8	1.59722	0.336772	1.93399	82.2616																195.583	I27	8.35329e+06	1.7922e+06
202.717	I28	8.35961e+06	1.75803e+06	192515	40485.8	1.59843	0.330351	1.92878	82.0399																202.717	I28	8.35961e+06	1.75803e+06
209.85	I29	8.36991e+06	1.76337e+06	192752	40608.9	1.6004	0.331355	1.93175	82.1663																209.85	I29	8.36991e+06	1.76337e+06
217.7	I30	8.33606e+06	1.79763e+06	191972	41397.8	1.59392	0.337792	1.93172	82.1648																217.7	I30	8.33606e+06	1.79763e+06
224.833	I31	8.3647e+06	1.77111e+06	192632	40787.1	1.5994	0.33281	1.93221	82.1858																224.833	I31	8.3647e+06	1.77111e+06
231.967	I32	8.34352e+06	1.79568e+06	192144	41353	1.59535	0.337427	1.93278	82.21																231.967	I32	8.34352e+06	1.79568e+06
239.1	I33	8.36505e+06	1.79766e+06	192640	41398.7	1.59947	0.3378	1.93727	82.401																239.1	I33	8.36505e+06	1.79766e+06
246.233	I34	8.36402e+06	1.79276e+06	192616	41285.8	1.59927	0.336879	1.93615	82.3534																246.233	I34	8.36402e+06	1.79276e+06
253.35	I35	8.37434e+06	1.82172e+06	192854	41952.6	1.60124	0.34232	1.94356	82.6687																253.35	I35	8.37434e+06	1.82172e+06
260.467	I36	8.34306e+06	1.81801e+06	192133	41867.3	1.59526	0.341624	1.93689	82.3847										z						260.467	I36	8.34306e+06	1.81801e+06
267.583	I37	8.48796e+06	1.76391e+06	195470	40621.4	1.62297	0.331458	1.95443	83.1308																267.583	I37	8.48796e+06	1.76391e+06
274.717	I38	8.60292e+06	1.76179e+06	198118	40572.5	1.64495	0.331059	1.97601	84.0488																274.717	I38	8.60292e+06	1.76179e+06
281.817	I39	8.59537e+06	1.77743e+06	197944	40932.8	1.64351	0.333998	1.97751	84.1125				z												281.817	I39	8.59537e+06	1.77743e+06
289.717	I40	8.57338e+06	1.75559e+06	197438	40429.7	1.6393	0.329893	1.96919	83.759																289.717	I40	8.57338e+06	1.75559e+06
296.833	I41	8.57817e+06	1.71965e+06	197548	39602.1	1.64022	0.32314	1.96336	83.5107			Rh concentration													296.833	I41	8.57817e+06	1.71965e+06
303.95	I42	8.56047e+06	1.80178e+06	197140	41493.4	1.63683	0.338573	1.97541	84.0232			actual weight (g)	0.0128												303.95	I42	8.56047e+06	1.80178e+06
311.083	I43	8.51173e+06	1.81476e+06	196018	41792.3	1.62751	0.341012	1.96852	83.7305			MW RhHCO(PPh3)3 (g/mol)	918.78												311.083	I43	8.51173e+06	1.81476e+06
318.2	I44	8.45461e+06	1.85792e+06	194702	42786.2	1.61659	0.349121	1.96571	83.6109			MW Rh(acac)(CO)2 (g/mol)	258.03												318.2	I44	8.45461e+06	1.85792e+06
325.317	I45	8.44676e+06	1.85627e+06	194522	42748.2	1.61509	0.348812	1.9639	83.5339			Number of mol (n)	4.96066e-05												325.317	I45	8.44676e+06	1.85627e+06
332.433	I46	8.42742e+06	1.85351e+06	194076	42684.8	1.61139	0.348294	1.95969	83.3546			actual volume of reaction (L)	0.0211												332.433	I46	8.42742e+06	1.85351e+06
339.55	I47	8.35595e+06	1.8958e+06	192430	43658.6	1.59773	0.35624	1.95397	83.1112			[Rh] (M)	0.00235103												339.55	I47	8.35595e+06	1.8958e+06
346.667	I48	8.36526e+06	1.86781e+06	192645	43014.1	1.59951	0.350981	1.95049	82.9633			[Rh] (mM)	2.35103												346.667	I48	8.36526e+06	1.86781e+06
353.783	I49	8.42595e+06	1.86244e+06	194042	42890.4	1.61111	0.349972	1.96108	83.4139																353.783	I49	8.42595e+06	1.86244e+06
361.667	I50	8.33528e+06	1.87062e+06	191954	43078.8	1.59377	0.351509	1.94528	82.7419																361.667	I50	8.33528e+06	1.87062e+06
												0
time [min]:	Peak name																								time [min]:	Peak name	1	2
0	I0																								0	I0	-10304.9	-32246.8
7.1	I1																								7.1	I1	279533	140979
14.2167	I2																								14.2167	I2	4.65934e+06	981940
21.3333	I3																								21.3333	I3	7.40123e+06	1.47403e+06
28.4667	I4																								28.4667	I4	8.063e+06	1.62184e+06
36.5667	I5																								36.5667	I5	8.24912e+06	1.67705e+06
44.1167	I6																								44.1167	I6	8.18048e+06	1.63398e+06
51.3167	I7																								51.3167	I7	8.24657e+06	1.68162e+06
58.45	I8																								58.45	I8	8.25864e+06	1.65077e+06
65.5667	I9																								65.5667	I9	8.29941e+06	1.69561e+06
73.6	I10																								73.6	I10	8.3268e+06	1.65476e+06
80.7	I11																								80.7	I11	8.32987e+06	1.67541e+06
87.8333	I12																								87.8333	I12	8.29486e+06	1.71285e+06
94.9667	I13																								94.9667	I13	8.34519e+06	1.70974e+06
102.117	I14																								102.117	I14	8.35398e+06	1.71376e+06
109.25	I15																								109.25	I15	8.32763e+06	1.71517e+06
116.383	I16																								116.383	I16	8.34178e+06	1.72456e+06
123.533	I17																								123.533	I17	8.35238e+06	1.71072e+06
130.7	I18																								130.7	I18	8.32413e+06	1.7301e+06
137.817	I19																								137.817	I19	8.32749e+06	1.74006e+06
145.65	I20																								145.65	I20	8.35366e+06	1.75201e+06
152.767	I21																								152.767	I21	8.29729e+06	1.73845e+06
159.9	I22																								159.9	I22	8.33076e+06	1.76029e+06
167.017	I23																								167.017	I23	8.27624e+06	1.78195e+06
174.167	I24																								174.167	I24	8.38434e+06	1.77044e+06
181.3	I25																								181.3	I25	8.31092e+06	1.78904e+06
188.45	I26																								188.45	I26	8.36922e+06	1.78473e+06
195.583	I27																								195.583	I27	8.35329e+06	1.7922e+06
202.717	I28																								202.717	I28	8.35961e+06	1.75803e+06
209.85	I29																								209.85	I29	8.36991e+06	1.76337e+06
217.7	I30																								217.7	I30	8.33606e+06	1.79763e+06
224.833	I31																								224.833	I31	8.3647e+06	1.77111e+06
231.967	I32																								231.967	I32	8.34352e+06	1.79568e+06
239.1	I33																								239.1	I33	8.36505e+06	1.79766e+06
246.233	I34																								246.233	I34	8.36402e+06	1.79276e+06
253.35	I35																								253.35	I35	8.37434e+06	1.82172e+06
260.467	I36																								260.467	I36	8.34306e+06	1.81801e+06
267.583	I37																								267.583	I37	8.48796e+06	1.76391e+06
274.717	I38																								274.717	I38	8.60292e+06	1.76179e+06
281.817	I39																								281.817	I39	8.59537e+06	1.77743e+06
289.717	I40																								289.717	I40	8.57338e+06	1.75559e+06
296.833	I41																								296.833	I41	8.57817e+06	1.71965e+06
303.95	I42																								303.95	I42	8.56047e+06	1.80178e+06
311.083	I43																								311.083	I43	8.51173e+06	1.81476e+06
318.2	I44																								318.2	I44	8.45461e+06	1.85792e+06
325.317	I45																								325.317	I45	8.44676e+06	1.85627e+06
332.433	I46																								332.433	I46	8.42742e+06	1.85351e+06
339.55	I47																								339.55	I47	8.35595e+06	1.8958e+06
346.667	I48																								346.667	I48	8.36526e+06	1.86781e+06
353.783	I49																								353.783	I49	8.42595e+06	1.86244e+06
361.667	I50																								361.667	I50	8.33528e+06	1.87062e+06
time [min]:	Peak name																								time [min]:	Peak name	1	2
0	I0																								0	I0	-10304.9	-32246.8
7.1	I1																								7.1	I1	279533	140979
14.2167	I2																								14.2167	I2	4.65934e+06	981940
21.3333	I3																								21.3333	I3	7.40123e+06	1.47403e+06
28.4667	I4																								28.4667	I4	8.063e+06	1.62184e+06
36.5667	I5																								36.5667	I5	8.24912e+06	1.67705e+06
44.1167	I6																								44.1167	I6	8.18048e+06	1.63398e+06
51.3167	I7																								51.3167	I7	8.24657e+06	1.68162e+06
58.45	I8																								58.45	I8	8.25864e+06	1.65077e+06
65.5667	I9																								65.5667	I9	8.29941e+06	1.69561e+06
73.6	I10																								73.6	I10	8.3268e+06	1.65476e+06
80.7	I11																								80.7	I11	8.32987e+06	1.67541e+06
87.8333	I12																								87.8333	I12	8.29486e+06	1.71285e+06
94.9667	I13																								94.9667	I13	8.34519e+06	1.70974e+06
102.117	I14																								102.117	I14	8.35398e+06	1.71376e+06
109.25	I15																								109.25	I15	8.32763e+06	1.71517e+06
116.383	I16																								116.383	I16	8.34178e+06	1.72456e+06
123.533	I17																								123.533	I17	8.35238e+06	1.71072e+06
130.7	I18																								130.7	I18	8.32413e+06	1.7301e+06
137.817	I19																								137.817	I19	8.32749e+06	1.74006e+06
145.65	I20																								145.65	I20	8.35366e+06	1.75201e+06
152.767	I21																								152.767	I21	8.29729e+06	1.73845e+06
159.9	I22																								159.9	I22	8.33076e+06	1.76029e+06
167.017	I23																								167.017	I23	8.27624e+06	1.78195e+06
174.167	I24																								174.167	I24	8.38434e+06	1.77044e+06
181.3	I25																								181.3	I25	8.31092e+06	1.78904e+06
188.45	I26																								188.45	I26	8.36922e+06	1.78473e+06
195.583	I27																								195.583	I27	8.35329e+06	1.7922e+06
202.717	I28																								202.717	I28	8.35961e+06	1.75803e+06
209.85	I29																								209.85	I29	8.36991e+06	1.76337e+06
217.7	I30																								217.7	I30	8.33606e+06	1.79763e+06
224.833	I31																								224.833	I31	8.3647e+06	1.77111e+06
231.967	I32																								231.967	I32	8.34352e+06	1.79568e+06
239.1	I33																								239.1	I33	8.36505e+06	1.79766e+06
246.233	I34																								246.233	I34	8.36402e+06	1.79276e+06
253.35	I35																								253.35	I35	8.37434e+06	1.82172e+06
260.467	I36																								260.467	I36	8.34306e+06	1.81801e+06
267.583	I37																								267.583	I37	8.48796e+06	1.76391e+06
274.717	I38																								274.717	I38	8.60292e+06	1.76179e+06
281.817	I39																								281.817	I39	8.59537e+06	1.77743e+06
289.717	I40																								289.717	I40	8.57338e+06	1.75559e+06
296.833	I41																								296.833	I41	8.57817e+06	1.71965e+06
303.95	I42																								303.95	I42	8.56047e+06	1.80178e+06
311.083	I43																								311.083	I43	8.51173e+06	1.81476e+06
318.2	I44																								318.2	I44	8.45461e+06	1.85792e+06
325.317	I45																								325.317	I45	8.44676e+06	1.85627e+06
332.433	I46																								332.433	I46	8.42742e+06	1.85351e+06
339.55	I47																								339.55	I47	8.35595e+06	1.8958e+06
346.667	I48																								346.667	I48	8.36526e+06	1.86781e+06
353.783	I49																								353.783	I49	8.42595e+06	1.86244e+06
361.667	I50																								361.667	I50	8.33528e+06	1.87062e+06
time [min]:	Peak name																								time [min]:	Peak name	1	2
0	I0																								0	I0	-10304.9	-32246.8
7.1	I1																								7.1	I1	279533	140979
14.2167	I2																								14.2167	I2	4.65934e+06	981940
21.3333	I3																								21.3333	I3	7.40123e+06	1.47403e+06
28.4667	I4																								28.4667	I4	8.063e+06	1.62184e+06
36.5667	I5																								36.5667	I5	8.24912e+06	1.67705e+06
44.1167	I6																								44.1167	I6	8.18048e+06	1.63398e+06
51.3167	I7																								51.3167	I7	8.24657e+06	1.68162e+06
58.45	I8																								58.45	I8	8.25864e+06	1.65077e+06
65.5667	I9																								65.5667	I9	8.29941e+06	1.69561e+06
73.6	I10																								73.6	I10	8.3268e+06	1.65476e+06
80.7	I11																								80.7	I11	8.32987e+06	1.67541e+06
87.8333	I12																								87.8333	I12	8.29486e+06	1.71285e+06
94.9667	I13																								94.9667	I13	8.34519e+06	1.70974e+06
102.117	I14																								102.117	I14	8.35398e+06	1.71376e+06
109.25	I15																								109.25	I15	8.32763e+06	1.71517e+06
116.383	I16																								116.383	I16	8.34178e+06	1.72456e+06
123.533	I17																								123.533	I17	8.35238e+06	1.71072e+06
130.7	I18																								130.7	I18	8.32413e+06	1.7301e+06
137.817	I19																								137.817	I19	8.32749e+06	1.74006e+06
145.65	I20																								145.65	I20	8.35366e+06	1.75201e+06
152.767	I21																								152.767	I21	8.29729e+06	1.73845e+06
159.9	I22																								159.9	I22	8.33076e+06	1.76029e+06
167.017	I23																								167.017	I23	8.27624e+06	1.78195e+06
174.167	I24																								174.167	I24	8.38434e+06	1.77044e+06
181.3	I25																								181.3	I25	8.31092e+06	1.78904e+06
188.45	I26																								188.45	I26	8.36922e+06	1.78473e+06
195.583	I27																								195.583	I27	8.35329e+06	1.7922e+06
202.717	I28																								202.717	I28	8.35961e+06	1.75803e+06
209.85	I29																								209.85	I29	8.36991e+06	1.76337e+06
217.7	I30																								217.7	I30	8.33606e+06	1.79763e+06
224.833	I31																								224.833	I31	8.3647e+06	1.77111e+06
231.967	I32																								231.967	I32	8.34352e+06	1.79568e+06
239.1	I33																								239.1	I33	8.36505e+06	1.79766e+06
246.233	I34																								246.233	I34	8.36402e+06	1.79276e+06
253.35	I35																								253.35	I35	8.37434e+06	1.82172e+06
260.467	I36																								260.467	I36	8.34306e+06	1.81801e+06
267.583	I37																								267.583	I37	8.48796e+06	1.76391e+06
274.717	I38																								274.717	I38	8.60292e+06	1.76179e+06
281.817	I39																								281.817	I39	8.59537e+06	1.77743e+06
289.717	I40																								289.717	I40	8.57338e+06	1.75559e+06
296.833	I41																								296.833	I41	8.57817e+06	1.71965e+06
303.95	I42																								303.95	I42	8.56047e+06	1.80178e+06
311.083	I43																								311.083	I43	8.51173e+06	1.81476e+06
318.2	I44																								318.2	I44	8.45461e+06	1.85792e+06
325.317	I45																								325.317	I45	8.44676e+06	1.85627e+06
332.433	I46																								332.433	I46	8.42742e+06	1.85351e+06
339.55	I47																								339.55	I47	8.35595e+06	1.8958e+06
346.667	I48																								346.667	I48	8.36526e+06	1.86781e+06
353.783	I49																								353.783	I49	8.42595e+06	1.86244e+06
361.667	I50																								361.667	I50	8.33528e+06	1.87062e+06
time [min]:	Peak name																								time [min]:	Peak name	1	2
0	I0																								0	I0	-10304.9	-32246.8
7.1	I1																								7.1	I1	279533	140979
14.2167	I2																								14.2167	I2	4.65934e+06	981940
21.3333	I3																								21.3333	I3	7.40123e+06	1.47403e+06
28.4667	I4																								28.4667	I4	8.063e+06	1.62184e+06
36.5667	I5																								36.5667	I5	8.24912e+06	1.67705e+06
44.1167	I6																								44.1167	I6	8.18048e+06	1.63398e+06
51.3167	I7																								51.3167	I7	8.24657e+06	1.68162e+06
58.45	I8																								58.45	I8	8.25864e+06	1.65077e+06
65.5667	I9																								65.5667	I9	8.29941e+06	1.69561e+06
73.6	I10																								73.6	I10	8.3268e+06	1.65476e+06
80.7	I11																								80.7	I11	8.32987e+06	1.67541e+06
87.8333	I12																								87.8333	I12	8.29486e+06	1.71285e+06
94.9667	I13																								94.9667	I13	8.34519e+06	1.70974e+06
102.117	I14																								102.117	I14	8.35398e+06	1.71376e+06
109.25	I15																								109.25	I15	8.32763e+06	1.71517e+06
116.383	I16																								116.383	I16	8.34178e+06	1.72456e+06
123.533	I17																								123.533	I17	8.35238e+06	1.71072e+06
130.7	I18																								130.7	I18	8.32413e+06	1.7301e+06
137.817	I19																								137.817	I19	8.32749e+06	1.74006e+06
145.65	I20																								145.65	I20	8.35366e+06	1.75201e+06
152.767	I21																								152.767	I21	8.29729e+06	1.73845e+06
159.9	I22																								159.9	I22	8.33076e+06	1.76029e+06
167.017	I23																								167.017	I23	8.27624e+06	1.78195e+06
174.167	I24																								174.167	I24	8.38434e+06	1.77044e+06
181.3	I25																								181.3	I25	8.31092e+06	1.78904e+06
188.45	I26																								188.45	I26	8.36922e+06	1.78473e+06
195.583	I27																								195.583	I27	8.35329e+06	1.7922e+06
202.717	I28																								202.717	I28	8.35961e+06	1.75803e+06
209.85	I29																								209.85	I29	8.36991e+06	1.76337e+06
217.7	I30																								217.7	I30	8.33606e+06	1.79763e+06
224.833	I31																								224.833	I31	8.3647e+06	1.77111e+06
231.967	I32																								231.967	I32	8.34352e+06	1.79568e+06
239.1	I33																								239.1	I33	8.36505e+06	1.79766e+06
246.233	I34																								246.233	I34	8.36402e+06	1.79276e+06
253.35	I35																								253.35	I35	8.37434e+06	1.82172e+06
260.467	I36																								260.467	I36	8.34306e+06	1.81801e+06
267.583	I37																								267.583	I37	8.48796e+06	1.76391e+06
274.717	I38																								274.717	I38	8.60292e+06	1.76179e+06
281.817	I39																								281.817	I39	8.59537e+06	1.77743e+06
289.717	I40																								289.717	I40	8.57338e+06	1.75559e+06
296.833	I41																								296.833	I41	8.57817e+06	1.71965e+06
303.95	I42																								303.95	I42	8.56047e+06	1.80178e+06
311.083	I43																								311.083	I43	8.51173e+06	1.81476e+06
318.2	I44																								318.2	I44	8.45461e+06	1.85792e+06
325.317	I45																								325.317	I45	8.44676e+06	1.85627e+06
332.433	I46																								332.433	I46	8.42742e+06	1.85351e+06
339.55	I47																								339.55	I47	8.35595e+06	1.8958e+06
346.667	I48																								346.667	I48	8.36526e+06	1.86781e+06
353.783	I49																								353.783	I49	8.42595e+06	1.86244e+06
361.667	I50																								361.667	I50	8.33528e+06	1.87062e+06
time [min]:	Peak name																								time [min]:	Peak name	1	2
0	I0																								0	I0	-10304.9	-32246.8
7.1	I1																								7.1	I1	279533	140979
14.2167	I2																								14.2167	I2	4.65934e+06	981940
21.3333	I3																								21.3333	I3	7.40123e+06	1.47403e+06
28.4667	I4																								28.4667	I4	8.063e+06	1.62184e+06
36.5667	I5																								36.5667	I5	8.24912e+06	1.67705e+06
44.1167	I6																								44.1167	I6	8.18048e+06	1.63398e+06
51.3167	I7																								51.3167	I7	8.24657e+06	1.68162e+06
58.45	I8																								58.45	I8	8.25864e+06	1.65077e+06
65.5667	I9																								65.5667	I9	8.29941e+06	1.69561e+06
73.6	I10																								73.6	I10	8.3268e+06	1.65476e+06
80.7	I11																								80.7	I11	8.32987e+06	1.67541e+06
87.8333	I12																								87.8333	I12	8.29486e+06	1.71285e+06
94.9667	I13																								94.9667	I13	8.34519e+06	1.70974e+06
102.117	I14																								102.117	I14	8.35398e+06	1.71376e+06
109.25	I15																								109.25	I15	8.32763e+06	1.71517e+06
116.383	I16																								116.383	I16	8.34178e+06	1.72456e+06
123.533	I17																								123.533	I17	8.35238e+06	1.71072e+06
130.7	I18																								130.7	I18	8.32413e+06	1.7301e+06
137.817	I19																								137.817	I19	8.32749e+06	1.74006e+06
145.65	I20																								145.65	I20	8.35366e+06	1.75201e+06
152.767	I21																								152.767	I21	8.29729e+06	1.73845e+06
159.9	I22																								159.9	I22	8.33076e+06	1.76029e+06
167.017	I23																								167.017	I23	8.27624e+06	1.78195e+06
174.167	I24																								174.167	I24	8.38434e+06	1.77044e+06
181.3	I25																								181.3	I25	8.31092e+06	1.78904e+06
188.45	I26																								188.45	I26	8.36922e+06	1.78473e+06
195.583	I27																								195.583	I27	8.35329e+06	1.7922e+06
202.717	I28																								202.717	I28	8.35961e+06	1.75803e+06
209.85	I29																								209.85	I29	8.36991e+06	1.76337e+06
217.7	I30																								217.7	I30	8.33606e+06	1.79763e+06
224.833	I31																								224.833	I31	8.3647e+06	1.77111e+06
231.967	I32																								231.967	I32	8.34352e+06	1.79568e+06
239.1	I33																								239.1	I33	8.36505e+06	1.79766e+06
246.233	I34																								246.233	I34	8.36402e+06	1.79276e+06
253.35	I35																								253.35	I35	8.37434e+06	1.82172e+06
260.467	I36																								260.467	I36	8.34306e+06	1.81801e+06
267.583	I37																								267.583	I37	8.48796e+06	1.76391e+06
274.717	I38																								274.717	I38	8.60292e+06	1.76179e+06
281.817	I39																								281.817	I39	8.59537e+06	1.77743e+06
289.717	I40																								289.717	I40	8.57338e+06	1.75559e+06
296.833	I41																								296.833	I41	8.57817e+06	1.71965e+06
303.95	I42																								303.95	I42	8.56047e+06	1.80178e+06
311.083	I43																								311.083	I43	8.51173e+06	1.81476e+06
318.2	I44																								318.2	I44	8.45461e+06	1.85792e+06
325.317	I45																								325.317	I45	8.44676e+06	1.85627e+06
332.433	I46																								332.433	I46	8.42742e+06	1.85351e+06
339.55	I47																								339.55	I47	8.35595e+06	1.8958e+06
346.667	I48																								346.667	I48	8.36526e+06	1.86781e+06
353.783	I49																								353.783	I49	8.42595e+06	1.86244e+06
361.667	I50																								361.667	I50	8.33528e+06	1.87062e+06
time [min]:	Peak name																								time [min]:	Peak name	1	2
0	I0																								0	I0	-10304.9	-32246.8
7.1	I1																								7.1	I1	279533	140979
14.2167	I2																								14.2167	I2	4.65934e+06	981940
21.3333	I3																								21.3333	I3	7.40123e+06	1.47403e+06
28.4667	I4																								28.4667	I4	8.063e+06	1.62184e+06
36.5667	I5																								36.5667	I5	8.24912e+06	1.67705e+06
44.1167	I6																								44.1167	I6	8.18048e+06	1.63398e+06
51.3167	I7																								51.3167	I7	8.24657e+06	1.68162e+06
58.45	I8																								58.45	I8	8.25864e+06	1.65077e+06
65.5667	I9																								65.5667	I9	8.29941e+06	1.69561e+06
73.6	I10																								73.6	I10	8.3268e+06	1.65476e+06
80.7	I11																								80.7	I11	8.32987e+06	1.67541e+06
87.8333	I12																								87.8333	I12	8.29486e+06	1.71285e+06
94.9667	I13																								94.9667	I13	8.34519e+06	1.70974e+06
102.117	I14																								102.117	I14	8.35398e+06	1.71376e+06
109.25	I15																								109.25	I15	8.32763e+06	1.71517e+06
116.383	I16																								116.383	I16	8.34178e+06	1.72456e+06
123.533	I17																								123.533	I17	8.35238e+06	1.71072e+06
130.7	I18																								130.7	I18	8.32413e+06	1.7301e+06
137.817	I19																								137.817	I19	8.32749e+06	1.74006e+06
145.65	I20																								145.65	I20	8.35366e+06	1.75201e+06
152.767	I21																								152.767	I21	8.29729e+06	1.73845e+06
159.9	I22																								159.9	I22	8.33076e+06	1.76029e+06
167.017	I23																								167.017	I23	8.27624e+06	1.78195e+06
174.167	I24																								174.167	I24	8.38434e+06	1.77044e+06
181.3	I25																								181.3	I25	8.31092e+06	1.78904e+06
188.45	I26																								188.45	I26	8.36922e+06	1.78473e+06
195.583	I27																								195.583	I27	8.35329e+06	1.7922e+06
202.717	I28																								202.717	I28	8.35961e+06	1.75803e+06
209.85	I29																								209.85	I29	8.36991e+06	1.76337e+06
217.7	I30																								217.7	I30	8.33606e+06	1.79763e+06
224.833	I31																								224.833	I31	8.3647e+06	1.77111e+06
231.967	I32																								231.967	I32	8.34352e+06	1.79568e+06
239.1	I33																								239.1	I33	8.36505e+06	1.79766e+06
246.233	I34																								246.233	I34	8.36402e+06	1.79276e+06
253.35	I35																								253.35	I35	8.37434e+06	1.82172e+06
260.467	I36																								260.467	I36	8.34306e+06	1.81801e+06
267.583	I37																								267.583	I37	8.48796e+06	1.76391e+06
274.717	I38																								274.717	I38	8.60292e+06	1.76179e+06
281.817	I39																								281.817	I39	8.59537e+06	1.77743e+06
289.717	I40																								289.717	I40	8.57338e+06	1.75559e+06
296.833	I41																								296.833	I41	8.57817e+06	1.71965e+06
303.95	I42																								303.95	I42	8.56047e+06	1.80178e+06
311.083	I43																								311.083	I43	8.51173e+06	1.81476e+06
318.2	I44																								318.2	I44	8.45461e+06	1.85792e+06
325.317	I45																								325.317	I45	8.44676e+06	1.85627e+06
332.433	I46																								332.433	I46	8.42742e+06	1.85351e+06
339.55	I47																								339.55	I47	8.35595e+06	1.8958e+06
346.667	I48																								346.667	I48	8.36526e+06	1.86781e+06
353.783	I49																								353.783	I49	8.42595e+06	1.86244e+06
361.667	I50																								361.667	I50	8.33528e+06	1.87062e+06
time [min]:	Peak name																								time [min]:	Peak name	1	2
0	I0																								0	I0	-10304.9	-32246.8
7.1	I1																								7.1	I1	279533	140979
14.2167	I2																								14.2167	I2	4.65934e+06	981940
21.3333	I3																								21.3333	I3	7.40123e+06	1.47403e+06
28.4667	I4																								28.4667	I4	8.063e+06	1.62184e+06
36.5667	I5																								36.5667	I5	8.24912e+06	1.67705e+06
44.1167	I6																								44.1167	I6	8.18048e+06	1.63398e+06
51.3167	I7																								51.3167	I7	8.24657e+06	1.68162e+06
58.45	I8																								58.45	I8	8.25864e+06	1.65077e+06
65.5667	I9																								65.5667	I9	8.29941e+06	1.69561e+06
73.6	I10																								73.6	I10	8.3268e+06	1.65476e+06
80.7	I11																								80.7	I11	8.32987e+06	1.67541e+06
87.8333	I12																								87.8333	I12	8.29486e+06	1.71285e+06
94.9667	I13																								94.9667	I13	8.34519e+06	1.70974e+06
102.117	I14																								102.117	I14	8.35398e+06	1.71376e+06
109.25	I15																								109.25	I15	8.32763e+06	1.71517e+06
116.383	I16																								116.383	I16	8.34178e+06	1.72456e+06
123.533	I17																								123.533	I17	8.35238e+06	1.71072e+06
130.7	I18																								130.7	I18	8.32413e+06	1.7301e+06
137.817	I19																								137.817	I19	8.32749e+06	1.74006e+06
145.65	I20																								145.65	I20	8.35366e+06	1.75201e+06
152.767	I21																								152.767	I21	8.29729e+06	1.73845e+06
159.9	I22																								159.9	I22	8.33076e+06	1.76029e+06
167.017	I23																								167.017	I23	8.27624e+06	1.78195e+06
174.167	I24																								174.167	I24	8.38434e+06	1.77044e+06
181.3	I25																								181.3	I25	8.31092e+06	1.78904e+06
188.45	I26																								188.45	I26	8.36922e+06	1.78473e+06
195.583	I27																								195.583	I27	8.35329e+06	1.7922e+06
202.717	I28																								202.717	I28	8.35961e+06	1.75803e+06
209.85	I29																								209.85	I29	8.36991e+06	1.76337e+06
217.7	I30																								217.7	I30	8.33606e+06	1.79763e+06
224.833	I31																								224.833	I31	8.3647e+06	1.77111e+06
231.967	I32																								231.967	I32	8.34352e+06	1.79568e+06
239.1	I33																								239.1	I33	8.36505e+06	1.79766e+06
246.233	I34																								246.233	I34	8.36402e+06	1.79276e+06
253.35	I35																								253.35	I35	8.37434e+06	1.82172e+06
260.467	I36																								260.467	I36	8.34306e+06	1.81801e+06
267.583	I37																								267.583	I37	8.48796e+06	1.76391e+06
274.717	I38																								274.717	I38	8.60292e+06	1.76179e+06
281.817	I39																								281.817	I39	8.59537e+06	1.77743e+06
289.717	I40																								289.717	I40	8.57338e+06	1.75559e+06
296.833	I41																								296.833	I41	8.57817e+06	1.71965e+06
303.95	I42																								303.95	I42	8.56047e+06	1.80178e+06
311.083	I43																								311.083	I43	8.51173e+06	1.81476e+06
318.2	I44																								318.2	I44	8.45461e+06	1.85792e+06
325.317	I45																								325.317	I45	8.44676e+06	1.85627e+06
332.433	I46																								332.433	I46	8.42742e+06	1.85351e+06
339.55	I47																								339.55	I47	8.35595e+06	1.8958e+06
346.667	I48																								346.667	I48	8.36526e+06	1.86781e+06
353.783	I49																								353.783	I49	8.42595e+06	1.86244e+06
361.667	I50																								361.667	I50	8.33528e+06	1.87062e+06
time [min]:	Peak name																								time [min]:	Peak name	1	2
0	I0																								0	I0	-10304.9	-32246.8
7.1	I1																								7.1	I1	279533	140979
14.2167	I2																								14.2167	I2	4.65934e+06	981940
21.3333	I3																								21.3333	I3	7.40123e+06	1.47403e+06
28.4667	I4																								28.4667	I4	8.063e+06	1.62184e+06
36.5667	I5																								36.5667	I5	8.24912e+06	1.67705e+06
44.1167	I6																								44.1167	I6	8.18048e+06	1.63398e+06
51.3167	I7																								51.3167	I7	8.24657e+06	1.68162e+06
58.45	I8																								58.45	I8	8.25864e+06	1.65077e+06
65.5667	I9																								65.5667	I9	8.29941e+06	1.69561e+06
73.6	I10																								73.6	I10	8.3268e+06	1.65476e+06
80.7	I11																								80.7	I11	8.32987e+06	1.67541e+06
87.8333	I12																								87.8333	I12	8.29486e+06	1.71285e+06
94.9667	I13																								94.9667	I13	8.34519e+06	1.70974e+06
102.117	I14																								102.117	I14	8.35398e+06	1.71376e+06
109.25	I15																								109.25	I15	8.32763e+06	1.71517e+06
116.383	I16																								116.383	I16	8.34178e+06	1.72456e+06
123.533	I17																								123.533	I17	8.35238e+06	1.71072e+06
130.7	I18																								130.7	I18	8.32413e+06	1.7301e+06
137.817	I19																								137.817	I19	8.32749e+06	1.74006e+06
145.65	I20																								145.65	I20	8.35366e+06	1.75201e+06
152.767	I21																								152.767	I21	8.29729e+06	1.73845e+06
159.9	I22																								159.9	I22	8.33076e+06	1.76029e+06
167.017	I23																								167.017	I23	8.27624e+06	1.78195e+06
174.167	I24																								174.167	I24	8.38434e+06	1.77044e+06
181.3	I25																								181.3	I25	8.31092e+06	1.78904e+06
188.45	I26																								188.45	I26	8.36922e+06	1.78473e+06
195.583	I27																								195.583	I27	8.35329e+06	1.7922e+06
202.717	I28																								202.717	I28	8.35961e+06	1.75803e+06
209.85	I29																								209.85	I29	8.36991e+06	1.76337e+06
217.7	I30																								217.7	I30	8.33606e+06	1.79763e+06
224.833	I31																								224.833	I31	8.3647e+06	1.77111e+06
231.967	I32																								231.967	I32	8.34352e+06	1.79568e+06
239.1	I33																								239.1	I33	8.36505e+06	1.79766e+06
246.233	I34																								246.233	I34	8.36402e+06	1.79276e+06
253.35	I35																								253.35	I35	8.37434e+06	1.82172e+06
260.467	I36																								260.467	I36	8.34306e+06	1.81801e+06
267.583	I37																								267.583	I37	8.48796e+06	1.76391e+06
274.717	I38																								274.717	I38	8.60292e+06	1.76179e+06
281.817	I39																								281.817	I39	8.59537e+06	1.77743e+06
289.717	I40																								289.717	I40	8.57338e+06	1.75559e+06
296.833	I41																								296.833	I41	8.57817e+06	1.71965e+06
303.95	I42																								303.95	I42	8.56047e+06	1.80178e+06
311.083	I43																								311.083	I43	8.51173e+06	1.81476e+06
318.2	I44																								318.2	I44	8.45461e+06	1.85792e+06
325.317	I45																								325.317	I45	8.44676e+06	1.85627e+06
332.433	I46																								332.433	I46	8.42742e+06	1.85351e+06
339.55	I47																								339.55	I47	8.35595e+06	1.8958e+06
346.667	I48																								346.667	I48	8.36526e+06	1.86781e+06
353.783	I49																								353.783	I49	8.42595e+06	1.86244e+06
361.667	I50																								361.667	I50	8.33528e+06	1.87062e+06
time [min]:	Peak name																								time [min]:	Peak name	1	2
0	I0																								0	I0	-10304.9	-32246.8
7.1	I1																								7.1	I1	279533	140979
14.2167	I2																								14.2167	I2	4.65934e+06	981940
21.3333	I3																								21.3333	I3	7.40123e+06	1.47403e+06
28.4667	I4																								28.4667	I4	8.063e+06	1.62184e+06
36.5667	I5																								36.5667	I5	8.24912e+06	1.67705e+06
44.1167	I6																								44.1167	I6	8.18048e+06	1.63398e+06
51.3167	I7																								51.3167	I7	8.24657e+06	1.68162e+06
58.45	I8																								58.45	I8	8.25864e+06	1.65077e+06
65.5667	I9																								65.5667	I9	8.29941e+06	1.69561e+06
73.6	I10																								73.6	I10	8.3268e+06	1.65476e+06
80.7	I11																								80.7	I11	8.32987e+06	1.67541e+06
87.8333	I12																								87.8333	I12	8.29486e+06	1.71285e+06
94.9667	I13																								94.9667	I13	8.34519e+06	1.70974e+06
102.117	I14																								102.117	I14	8.35398e+06	1.71376e+06
109.25	I15																								109.25	I15	8.32763e+06	1.71517e+06
116.383	I16																								116.383	I16	8.34178e+06	1.72456e+06
123.533	I17																								123.533	I17	8.35238e+06	1.71072e+06
130.7	I18																								130.7	I18	8.32413e+06	1.7301e+06
137.817	I19																								137.817	I19	8.32749e+06	1.74006e+06
145.65	I20																								145.65	I20	8.35366e+06	1.75201e+06
152.767	I21																								152.767	I21	8.29729e+06	1.73845e+06
159.9	I22																								159.9	I22	8.33076e+06	1.76029e+06
167.017	I23																								167.017	I23	8.27624e+06	1.78195e+06
174.167	I24																								174.167	I24	8.38434e+06	1.77044e+06
181.3	I25																								181.3	I25	8.31092e+06	1.78904e+06
188.45	I26																								188.45	I26	8.36922e+06	1.78473e+06
195.583	I27																								195.583	I27	8.35329e+06	1.7922e+06
202.717	I28																								202.717	I28	8.35961e+06	1.75803e+06
209.85	I29																								209.85	I29	8.36991e+06	1.76337e+06
217.7	I30																								217.7	I30	8.33606e+06	1.79763e+06
224.833	I31																								224.833	I31	8.3647e+06	1.77111e+06
231.967	I32																								231.967	I32	8.34352e+06	1.79568e+06
239.1	I33																								239.1	I33	8.36505e+06	1.79766e+06
246.233	I34																								246.233	I34	8.36402e+06	1.79276e+06
253.35	I35																								253.35	I35	8.37434e+06	1.82172e+06
260.467	I36																								260.467	I36	8.34306e+06	1.81801e+06
267.583	I37																								267.583	I37	8.48796e+06	1.76391e+06
274.717	I38																								274.717	I38	8.60292e+06	1.76179e+06
281.817	I39																								281.817	I39	8.59537e+06	1.77743e+06
289.717	I40																								289.717	I40	8.57338e+06	1.75559e+06
296.833	I41																								296.833	I41	8.57817e+06	1.71965e+06
303.95	I42																								303.95	I42	8.56047e+06	1.80178e+06
311.083	I43																								311.083	I43	8.51173e+06	1.81476e+06
318.2	I44																								318.2	I44	8.45461e+06	1.85792e+06
325.317	I45																								325.317	I45	8.44676e+06	1.85627e+06
332.433	I46																								332.433	I46	8.42742e+06	1.85351e+06
339.55	I47																								339.55	I47	8.35595e+06	1.8958e+06
346.667	I48																								346.667	I48	8.36526e+06	1.86781e+06
353.783	I49																								353.783	I49	8.42595e+06	1.86244e+06
361.667	I50																								361.667	I50	8.33528e+06	1.87062e+06
time [min]:	Peak name																								time [min]:	Peak name	1	2
0	I0																								0	I0	-10304.9	-32246.8
7.1	I1																								7.1	I1	279533	140979
14.2167	I2																								14.2167	I2	4.65934e+06	981940
21.3333	I3																								21.3333	I3	7.40123e+06	1.47403e+06
28.4667	I4																								28.4667	I4	8.063e+06	1.62184e+06
36.5667	I5																								36.5667	I5	8.24912e+06	1.67705e+06
44.1167	I6																								44.1167	I6	8.18048e+06	1.63398e+06
51.3167	I7																								51.3167	I7	8.24657e+06	1.68162e+06
58.45	I8																								58.45	I8	8.25864e+06	1.65077e+06
65.5667	I9																								65.5667	I9	8.29941e+06	1.69561e+06
73.6	I10																								73.6	I10	8.3268e+06	1.65476e+06
80.7	I11																								80.7	I11	8.32987e+06	1.67541e+06
87.8333	I12																								87.8333	I12	8.29486e+06	1.71285e+06
94.9667	I13																								94.9667	I13	8.34519e+06	1.70974e+06
102.117	I14																								102.117	I14	8.35398e+06	1.71376e+06
109.25	I15																								109.25	I15	8.32763e+06	1.71517e+06
116.383	I16																								116.383	I16	8.34178e+06	1.72456e+06
123.533	I17																								123.533	I17	8.35238e+06	1.71072e+06
130.7	I18																								130.7	I18	8.32413e+06	1.7301e+06
137.817	I19																								137.817	I19	8.32749e+06	1.74006e+06
145.65	I20																								145.65	I20	8.35366e+06	1.75201e+06
152.767	I21																								152.767	I21	8.29729e+06	1.73845e+06
159.9	I22																								159.9	I22	8.33076e+06	1.76029e+06
167.017	I23																								167.017	I23	8.27624e+06	1.78195e+06
174.167	I24																								174.167	I24	8.38434e+06	1.77044e+06
181.3	I25																								181.3	I25	8.31092e+06	1.78904e+06
188.45	I26																								188.45	I26	8.36922e+06	1.78473e+06
195.583	I27																								195.583	I27	8.35329e+06	1.7922e+06
202.717	I28																								202.717	I28	8.35961e+06	1.75803e+06
209.85	I29																								209.85	I29	8.36991e+06	1.76337e+06
217.7	I30																								217.7	I30	8.33606e+06	1.79763e+06
224.833	I31																								224.833	I31	8.3647e+06	1.77111e+06
231.967	I32																								231.967	I32	8.34352e+06	1.79568e+06
239.1	I33																								239.1	I33	8.36505e+06	1.79766e+06
246.233	I34																								246.233	I34	8.36402e+06	1.79276e+06
253.35	I35																								253.35	I35	8.37434e+06	1.82172e+06
260.467	I36																								260.467	I36	8.34306e+06	1.81801e+06
267.583	I37																								267.583	I37	8.48796e+06	1.76391e+06
274.717	I38																								274.717	I38	8.60292e+06	1.76179e+06
281.817	I39																								281.817	I39	8.59537e+06	1.77743e+06
289.717	I40																								289.717	I40	8.57338e+06	1.75559e+06
296.833	I41																								296.833	I41	8.57817e+06	1.71965e+06
303.95	I42																								303.95	I42	8.56047e+06	1.80178e+06
311.083	I43																								311.083	I43	8.51173e+06	1.81476e+06
318.2	I44																								318.2	I44	8.45461e+06	1.85792e+06
325.317	I45																								325.317	I45	8.44676e+06	1.85627e+06
332.433	I46																								332.433	I46	8.42742e+06	1.85351e+06
339.55	I47																								339.55	I47	8.35595e+06	1.8958e+06
346.667	I48																								346.667	I48	8.36526e+06	1.86781e+06
353.783	I49																								353.783	I49	8.42595e+06	1.86244e+06
361.667	I50																								361.667	I50	8.33528e+06	1.87062e+06
time [min]:	Peak name																								time [min]:	Peak name	1	2
0	I0																								0	I0	-10304.9	-32246.8
7.1	I1																								7.1	I1	279533	140979
14.2167	I2																								14.2167	I2	4.65934e+06	981940
21.3333	I3																								21.3333	I3	7.40123e+06	1.47403e+06
28.4667	I4																								28.4667	I4	8.063e+06	1.62184e+06
36.5667	I5																								36.5667	I5	8.24912e+06	1.67705e+06
44.1167	I6																								44.1167	I6	8.18048e+06	1.63398e+06
51.3167	I7																								51.3167	I7	8.24657e+06	1.68162e+06
58.45	I8																								58.45	I8	8.25864e+06	1.65077e+06
65.5667	I9																								65.5667	I9	8.29941e+06	1.69561e+06
73.6	I10																								73.6	I10	8.3268e+06	1.65476e+06
80.7	I11																								80.7	I11	8.32987e+06	1.67541e+06
87.8333	I12																								87.8333	I12	8.29486e+06	1.71285e+06
94.9667	I13																								94.9667	I13	8.34519e+06	1.70974e+06
102.117	I14																								102.117	I14	8.35398e+06	1.71376e+06
109.25	I15																								109.25	I15	8.32763e+06	1.71517e+06
116.383	I16																								116.383	I16	8.34178e+06	1.72456e+06
123.533	I17																								123.533	I17	8.35238e+06	1.71072e+06
130.7	I18																								130.7	I18	8.32413e+06	1.7301e+06
137.817	I19																								137.817	I19	8.32749e+06	1.74006e+06
145.65	I20																								145.65	I20	8.35366e+06	1.75201e+06
152.767	I21																								152.767	I21	8.29729e+06	1.73845e+06
159.9	I22																								159.9	I22	8.33076e+06	1.76029e+06
167.017	I23																								167.017	I23	8.27624e+06	1.78195e+06
174.167	I24																								174.167	I24	8.38434e+06	1.77044e+06
181.3	I25																								181.3	I25	8.31092e+06	1.78904e+06
188.45	I26																								188.45	I26	8.36922e+06	1.78473e+06
195.583	I27																								195.583	I27	8.35329e+06	1.7922e+06
202.717	I28																								202.717	I28	8.35961e+06	1.75803e+06
209.85	I29																								209.85	I29	8.36991e+06	1.76337e+06
217.7	I30																								217.7	I30	8.33606e+06	1.79763e+06
224.833	I31																								224.833	I31	8.3647e+06	1.77111e+06
231.967	I32																								231.967	I32	8.34352e+06	1.79568e+06
239.1	I33																								239.1	I33	8.36505e+06	1.79766e+06
246.233	I34																								246.233	I34	8.36402e+06	1.79276e+06
253.35	I35																								253.35	I35	8.37434e+06	1.82172e+06
260.467	I36																								260.467	I36	8.34306e+06	1.81801e+06
267.583	I37																								267.583	I37	8.48796e+06	1.76391e+06
274.717	I38																								274.717	I38	8.60292e+06	1.76179e+06
281.817	I39																								281.817	I39	8.59537e+06	1.77743e+06
289.717	I40																								289.717	I40	8.57338e+06	1.75559e+06
296.833	I41																								296.833	I41	8.57817e+06	1.71965e+06
303.95	I42																								303.95	I42	8.56047e+06	1.80178e+06
311.083	I43																								311.083	I43	8.51173e+06	1.81476e+06
318.2	I44																								318.2	I44	8.45461e+06	1.85792e+06
325.317	I45																								325.317	I45	8.44676e+06	1.85627e+06
332.433	I46																								332.433	I46	8.42742e+06	1.85351e+06
339.55	I47																								339.55	I47	8.35595e+06	1.8958e+06
346.667	I48																								346.667	I48	8.36526e+06	1.86781e+06
353.783	I49																								353.783	I49	8.42595e+06	1.86244e+06
361.667	I50																								361.667	I50	8.33528e+06	1.87062e+06
time [min]:	Peak name																								time [min]:	Peak name	1	2
0	I0																								0	I0	-10304.9	-32246.8
7.1	I1																								7.1	I1	279533	140979
14.2167	I2																								14.2167	I2	4.65934e+06	981940
21.3333	I3																								21.3333	I3	7.40123e+06	1.47403e+06
28.4667	I4																								28.4667	I4	8.063e+06	1.62184e+06
36.5667	I5																								36.5667	I5	8.24912e+06	1.67705e+06
44.1167	I6																								44.1167	I6	8.18048e+06	1.63398e+06
51.3167	I7																								51.3167	I7	8.24657e+06	1.68162e+06
58.45	I8																								58.45	I8	8.25864e+06	1.65077e+06
65.5667	I9																								65.5667	I9	8.29941e+06	1.69561e+06
73.6	I10																								73.6	I10	8.3268e+06	1.65476e+06
80.7	I11																								80.7	I11	8.32987e+06	1.67541e+06
87.8333	I12																								87.8333	I12	8.29486e+06	1.71285e+06
94.9667	I13																								94.9667	I13	8.34519e+06	1.70974e+06
102.117	I14																								102.117	I14	8.35398e+06	1.71376e+06
109.25	I15																								109.25	I15	8.32763e+06	1.71517e+06
116.383	I16																								116.383	I16	8.34178e+06	1.72456e+06
123.533	I17																								123.533	I17	8.35238e+06	1.71072e+06
130.7	I18																								130.7	I18	8.32413e+06	1.7301e+06
137.817	I19																								137.817	I19	8.32749e+06	1.74006e+06
145.65	I20																								145.65	I20	8.35366e+06	1.75201e+06
152.767	I21																								152.767	I21	8.29729e+06	1.73845e+06
159.9	I22																								159.9	I22	8.33076e+06	1.76029e+06
167.017	I23																								167.017	I23	8.27624e+06	1.78195e+06
174.167	I24																								174.167	I24	8.38434e+06	1.77044e+06
181.3	I25																								181.3	I25	8.31092e+06	1.78904e+06
188.45	I26																								188.45	I26	8.36922e+06	1.78473e+06
195.583	I27																								195.583	I27	8.35329e+06	1.7922e+06
202.717	I28																								202.717	I28	8.35961e+06	1.75803e+06
209.85	I29																								209.85	I29	8.36991e+06	1.76337e+06
217.7	I30																								217.7	I30	8.33606e+06	1.79763e+06
224.833	I31																								224.833	I31	8.3647e+06	1.77111e+06
231.967	I32																								231.967	I32	8.34352e+06	1.79568e+06
239.1	I33																								239.1	I33	8.36505e+06	1.79766e+06
246.233	I34																								246.233	I34	8.36402e+06	1.79276e+06
253.35	I35																								253.35	I35	8.37434e+06	1.82172e+06
260.467	I36																								260.467	I36	8.34306e+06	1.81801e+06
267.583	I37																								267.583	I37	8.48796e+06	1.76391e+06
274.717	I38																								274.717	I38	8.60292e+06	1.76179e+06
281.817	I39																								281.817	I39	8.59537e+06	1.77743e+06
289.717	I40																								289.717	I40	8.57338e+06	1.75559e+06
296.833	I41																								296.833	I41	8.57817e+06	1.71965e+06
303.95	I42																								303.95	I42	8.56047e+06	1.80178e+06
311.083	I43																								311.083	I43	8.51173e+06	1.81476e+06
318.2	I44																								318.2	I44	8.45461e+06	1.85792e+06
325.317	I45																								325.317	I45	8.44676e+06	1.85627e+06
332.433	I46																								332.433	I46	8.42742e+06	1.85351e+06
339.55	I47																								339.55	I47	8.35595e+06	1.8958e+06
346.667	I48																								346.667	I48	8.36526e+06	1.86781e+06
353.783	I49																								353.783	I49	8.42595e+06	1.86244e+06
361.667	I50																								361.667	I50	8.33528e+06	1.87062e+06
time [min]:	Peak name																								time [min]:	Peak name	1	2
0	I0																								0	I0	-10304.9	-32246.8
7.1	I1																								7.1	I1	279533	140979
14.2167	I2																								14.2167	I2	4.65934e+06	981940
21.3333	I3																								21.3333	I3	7.40123e+06	1.47403e+06
28.4667	I4																								28.4667	I4	8.063e+06	1.62184e+06
36.5667	I5																								36.5667	I5	8.24912e+06	1.67705e+06
44.1167	I6																								44.1167	I6	8.18048e+06	1.63398e+06
51.3167	I7																								51.3167	I7	8.24657e+06	1.68162e+06
58.45	I8																								58.45	I8	8.25864e+06	1.65077e+06
65.5667	I9																								65.5667	I9	8.29941e+06	1.69561e+06
73.6	I10																								73.6	I10	8.3268e+06	1.65476e+06
80.7	I11																								80.7	I11	8.32987e+06	1.67541e+06
87.8333	I12																								87.8333	I12	8.29486e+06	1.71285e+06
94.9667	I13																								94.9667	I13	8.34519e+06	1.70974e+06
102.117	I14																								102.117	I14	8.35398e+06	1.71376e+06
109.25	I15																								109.25	I15	8.32763e+06	1.71517e+06
116.383	I16																								116.383	I16	8.34178e+06	1.72456e+06
123.533	I17																								123.533	I17	8.35238e+06	1.71072e+06
130.7	I18																								130.7	I18	8.32413e+06	1.7301e+06
137.817	I19																								137.817	I19	8.32749e+06	1.74006e+06
145.65	I20																								145.65	I20	8.35366e+06	1.75201e+06
152.767	I21																								152.767	I21	8.29729e+06	1.73845e+06
159.9	I22																								159.9	I22	8.33076e+06	1.76029e+06
167.017	I23																								167.017	I23	8.27624e+06	1.78195e+06
174.167	I24																								174.167	I24	8.38434e+06	1.77044e+06
181.3	I25																								181.3	I25	8.31092e+06	1.78904e+06
188.45	I26																								188.45	I26	8.36922e+06	1.78473e+06
195.583	I27																								195.583	I27	8.35329e+06	1.7922e+06
202.717	I28																								202.717	I28	8.35961e+06	1.75803e+06
209.85	I29																								209.85	I29	8.36991e+06	1.76337e+06
217.7	I30																								217.7	I30	8.33606e+06	1.79763e+06
224.833	I31																								224.833	I31	8.3647e+06	1.77111e+06
231.967	I32																								231.967	I32	8.34352e+06	1.79568e+06
239.1	I33																								239.1	I33	8.36505e+06	1.79766e+06
246.233	I34																								246.233	I34	8.36402e+06	1.79276e+06
253.35	I35																								253.35	I35	8.37434e+06	1.82172e+06
260.467	I36																								260.467	I36	8.34306e+06	1.81801e+06
267.583	I37																								267.583	I37	8.48796e+06	1.76391e+06
274.717	I38																								274.717	I38	8.60292e+06	1.76179e+06
281.817	I39																								281.817	I39	8.59537e+06	1.77743e+06
289.717	I40																								289.717	I40	8.57338e+06	1.75559e+06
296.833	I41																								296.833	I41	8.57817e+06	1.71965e+06
303.95	I42																								303.95	I42	8.56047e+06	1.80178e+06
311.083	I43																								311.083	I43	8.51173e+06	1.81476e+06
318.2	I44																								318.2	I44	8.45461e+06	1.85792e+06
325.317	I45																								325.317	I45	8.44676e+06	1.85627e+06
332.433	I46																								332.433	I46	8.42742e+06	1.85351e+06
339.55	I47																								339.55	I47	8.35595e+06	1.8958e+06
346.667	I48																								346.667	I48	8.36526e+06	1.86781e+06
353.783	I49																								353.783	I49	8.42595e+06	1.86244e+06
361.667	I50																								361.667	I50	8.33528e+06	1.87062e+06
time [min]:	Peak name																								time [min]:	Peak name	1	2
0	I0																								0	I0	-10304.9	-32246.8
7.1	I1																								7.1	I1	279533	140979
14.2167	I2																								14.2167	I2	4.65934e+06	981940
21.3333	I3																								21.3333	I3	7.40123e+06	1.47403e+06
28.4667	I4																								28.4667	I4	8.063e+06	1.62184e+06
36.5667	I5																								36.5667	I5	8.24912e+06	1.67705e+06
44.1167	I6																								44.1167	I6	8.18048e+06	1.63398e+06
51.3167	I7																								51.3167	I7	8.24657e+06	1.68162e+06
58.45	I8																								58.45	I8	8.25864e+06	1.65077e+06
65.5667	I9																								65.5667	I9	8.29941e+06	1.69561e+06
73.6	I10																								73.6	I10	8.3268e+06	1.65476e+06
80.7	I11																								80.7	I11	8.32987e+06	1.67541e+06
87.8333	I12																								87.8333	I12	8.29486e+06	1.71285e+06
94.9667	I13																								94.9667	I13	8.34519e+06	1.70974e+06
102.117	I14																								102.117	I14	8.35398e+06	1.71376e+06
109.25	I15																								109.25	I15	8.32763e+06	1.71517e+06
116.383	I16																								116.383	I16	8.34178e+06	1.72456e+06
123.533	I17																								123.533	I17	8.35238e+06	1.71072e+06
130.7	I18																								130.7	I18	8.32413e+06	1.7301e+06
137.817	I19																								137.817	I19	8.32749e+06	1.74006e+06
145.65	I20																								145.65	I20	8.35366e+06	1.75201e+06
152.767	I21																								152.767	I21	8.29729e+06	1.73845e+06
159.9	I22																								159.9	I22	8.33076e+06	1.76029e+06
167.017	I23																								167.017	I23	8.27624e+06	1.78195e+06
174.167	I24																								174.167	I24	8.38434e+06	1.77044e+06
181.3	I25																								181.3	I25	8.31092e+06	1.78904e+06
188.45	I26																								188.45	I26	8.36922e+06	1.78473e+06
195.583	I27																								195.583	I27	8.35329e+06	1.7922e+06
202.717	I28																								202.717	I28	8.35961e+06	1.75803e+06
209.85	I29																								209.85	I29	8.36991e+06	1.76337e+06
217.7	I30																								217.7	I30	8.33606e+06	1.79763e+06
224.833	I31																								224.833	I31	8.3647e+06	1.77111e+06
231.967	I32																								231.967	I32	8.34352e+06	1.79568e+06
239.1	I33																								239.1	I33	8.36505e+06	1.79766e+06
246.233	I34																								246.233	I34	8.36402e+06	1.79276e+06
253.35	I35																								253.35	I35	8.37434e+06	1.82172e+06
260.467	I36																								260.467	I36	8.34306e+06	1.81801e+06
267.583	I37																								267.583	I37	8.48796e+06	1.76391e+06
274.717	I38																								274.717	I38	8.60292e+06	1.76179e+06
281.817	I39																								281.817	I39	8.59537e+06	1.77743e+06
289.717	I40																								289.717	I40	8.57338e+06	1.75559e+06
296.833	I41																								296.833	I41	8.57817e+06	1.71965e+06
303.95	I42																								303.95	I42	8.56047e+06	1.80178e+06
311.083	I43																								311.083	I43	8.51173e+06	1.81476e+06
318.2	I44																								318.2	I44	8.45461e+06	1.85792e+06
325.317	I45																								325.317	I45	8.44676e+06	1.85627e+06
332.433	I46																								332.433	I46	8.42742e+06	1.85351e+06
339.55	I47																								339.55	I47	8.35595e+06	1.8958e+06
346.667	I48																								346.667	I48	8.36526e+06	1.86781e+06
353.783	I49																								353.783	I49	8.42595e+06	1.86244e+06
361.667	I50																								361.667	I50	8.33528e+06	1.87062e+06
time [min]:	Peak name																								time [min]:	Peak name	1	2
0	I0																								0	I0	-10304.9	-32246.8
7.1	I1																								7.1	I1	279533	140979
14.2167	I2																								14.2167	I2	4.65934e+06	981940
21.3333	I3																								21.3333	I3	7.40123e+06	1.47403e+06
28.4667	I4																								28.4667	I4	8.063e+06	1.62184e+06
36.5667	I5																								36.5667	I5	8.24912e+06	1.67705e+06
44.1167	I6																								44.1167	I6	8.18048e+06	1.63398e+06
51.3167	I7																								51.3167	I7	8.24657e+06	1.68162e+06
58.45	I8																								58.45	I8	8.25864e+06	1.65077e+06
65.5667	I9																								65.5667	I9	8.29941e+06	1.69561e+06
73.6	I10																								73.6	I10	8.3268e+06	1.65476e+06
80.7	I11																								80.7	I11	8.32987e+06	1.67541e+06
87.8333	I12																								87.8333	I12	8.29486e+06	1.71285e+06
94.9667	I13																								94.9667	I13	8.34519e+06	1.70974e+06
102.117	I14																								102.117	I14	8.35398e+06	1.71376e+06
109.25	I15																								109.25	I15	8.32763e+06	1.71517e+06
116.383	I16																								116.383	I16	8.34178e+06	1.72456e+06
123.533	I17																								123.533	I17	8.35238e+06	1.71072e+06
130.7	I18																								130.7	I18	8.32413e+06	1.7301e+06
137.817	I19																								137.817	I19	8.32749e+06	1.74006e+06
145.65	I20																								145.65	I20	8.35366e+06	1.75201e+06
152.767	I21																								152.767	I21	8.29729e+06	1.73845e+06
159.9	I22																								159.9	I22	8.33076e+06	1.76029e+06
167.017	I23																								167.017	I23	8.27624e+06	1.78195e+06
174.167	I24																								174.167	I24	8.38434e+06	1.77044e+06
181.3	I25																								181.3	I25	8.31092e+06	1.78904e+06
188.45	I26																								188.45	I26	8.36922e+06	1.78473e+06
195.583	I27																								195.583	I27	8.35329e+06	1.7922e+06
202.717	I28																								202.717	I28	8.35961e+06	1.75803e+06
209.85	I29																								209.85	I29	8.36991e+06	1.76337e+06
217.7	I30																								217.7	I30	8.33606e+06	1.79763e+06
224.833	I31																								224.833	I31	8.3647e+06	1.77111e+06
231.967	I32																								231.967	I32	8.34352e+06	1.79568e+06
239.1	I33																								239.1	I33	8.36505e+06	1.79766e+06
246.233	I34																								246.233	I34	8.36402e+06	1.79276e+06
253.35	I35																								253.35	I35	8.37434e+06	1.82172e+06
260.467	I36																								260.467	I36	8.34306e+06	1.81801e+06
267.583	I37																								267.583	I37	8.48796e+06	1.76391e+06
274.717	I38																								274.717	I38	8.60292e+06	1.76179e+06
281.817	I39																								281.817	I39	8.59537e+06	1.77743e+06
289.717	I40																								289.717	I40	8.57338e+06	1.75559e+06
296.833	I41																								296.833	I41	8.57817e+06	1.71965e+06
303.95	I42																								303.95	I42	8.56047e+06	1.80178e+06
311.083	I43																								311.083	I43	8.51173e+06	1.81476e+06
318.2	I44																								318.2	I44	8.45461e+06	1.85792e+06
325.317	I45																								325.317	I45	8.44676e+06	1.85627e+06
332.433	I46																								332.433	I46	8.42742e+06	1.85351e+06
339.55	I47																								339.55	I47	8.35595e+06	1.8958e+06
346.667	I48																								346.667	I48	8.36526e+06	1.86781e+06
353.783	I49																								353.783	I49	8.42595e+06	1.86244e+06
361.667	I50																								361.667	I50	8.33528e+06	1.87062e+06
time [min]:	Peak name																								time [min]:	Peak name	1	2
0	I0																								0	I0	-10304.9	-32246.8
7.1	I1																								7.1	I1	279533	140979
14.2167	I2																								14.2167	I2	4.65934e+06	981940
21.3333	I3																								21.3333	I3	7.40123e+06	1.47403e+06
28.4667	I4																								28.4667	I4	8.063e+06	1.62184e+06
36.5667	I5																								36.5667	I5	8.24912e+06	1.67705e+06
44.1167	I6																								44.1167	I6	8.18048e+06	1.63398e+06
51.3167	I7																								51.3167	I7	8.24657e+06	1.68162e+06
58.45	I8																								58.45	I8	8.25864e+06	1.65077e+06
65.5667	I9																								65.5667	I9	8.29941e+06	1.69561e+06
73.6	I10																								73.6	I10	8.3268e+06	1.65476e+06
80.7	I11																								80.7	I11	8.32987e+06	1.67541e+06
87.8333	I12																								87.8333	I12	8.29486e+06	1.71285e+06
94.9667	I13																								94.9667	I13	8.34519e+06	1.70974e+06
102.117	I14																								102.117	I14	8.35398e+06	1.71376e+06
109.25	I15																								109.25	I15	8.32763e+06	1.71517e+06
116.383	I16																								116.383	I16	8.34178e+06	1.72456e+06
123.533	I17																								123.533	I17	8.35238e+06	1.71072e+06
130.7	I18																								130.7	I18	8.32413e+06	1.7301e+06
137.817	I19																								137.817	I19	8.32749e+06	1.74006e+06
145.65	I20																								145.65	I20	8.35366e+06	1.75201e+06
152.767	I21																								152.767	I21	8.29729e+06	1.73845e+06
159.9	I22																								159.9	I22	8.33076e+06	1.76029e+06
167.017	I23																								167.017	I23	8.27624e+06	1.78195e+06
174.167	I24																								174.167	I24	8.38434e+06	1.77044e+06
181.3	I25																								181.3	I25	8.31092e+06	1.78904e+06
188.45	I26																								188.45	I26	8.36922e+06	1.78473e+06
195.583	I27																								195.583	I27	8.35329e+06	1.7922e+06
202.717	I28																								202.717	I28	8.35961e+06	1.75803e+06
209.85	I29																								209.85	I29	8.36991e+06	1.76337e+06
217.7	I30																								217.7	I30	8.33606e+06	1.79763e+06
224.833	I31																								224.833	I31	8.3647e+06	1.77111e+06
231.967	I32																								231.967	I32	8.34352e+06	1.79568e+06
239.1	I33																								239.1	I33	8.36505e+06	1.79766e+06
246.233	I34																								246.233	I34	8.36402e+06	1.79276e+06
253.35	I35																								253.35	I35	8.37434e+06	1.82172e+06
260.467	I36																								260.467	I36	8.34306e+06	1.81801e+06
267.583	I37																								267.583	I37	8.48796e+06	1.76391e+06
274.717	I38																								274.717	I38	8.60292e+06	1.76179e+06
281.817	I39																								281.817	I39	8.59537e+06	1.77743e+06
289.717	I40																								289.717	I40	8.57338e+06	1.75559e+06
296.833	I41																								296.833	I41	8.57817e+06	1.71965e+06
303.95	I42																								303.95	I42	8.56047e+06	1.80178e+06
311.083	I43																								311.083	I43	8.51173e+06	1.81476e+06
318.2	I44																								318.2	I44	8.45461e+06	1.85792e+06
325.317	I45																								325.317	I45	8.44676e+06	1.85627e+06
332.433	I46																								332.433	I46	8.42742e+06	1.85351e+06
339.55	I47																								339.55	I47	8.35595e+06	1.8958e+06
346.667	I48																								346.667	I48	8.36526e+06	1.86781e+06
353.783	I49																								353.783	I49	8.42595e+06	1.86244e+06
361.667	I50																								361.667	I50	8.33528e+06	1.87062e+06
time [min]:	Peak name																								time [min]:	Peak name	1	2
0	I0																								0	I0	-10304.9	-32246.8
7.1	I1																								7.1	I1	279533	140979
14.2167	I2																								14.2167	I2	4.65934e+06	981940
21.3333	I3																								21.3333	I3	7.40123e+06	1.47403e+06
28.4667	I4																								28.4667	I4	8.063e+06	1.62184e+06
36.5667	I5																								36.5667	I5	8.24912e+06	1.67705e+06
44.1167	I6																								44.1167	I6	8.18048e+06	1.63398e+06
51.3167	I7																								51.3167	I7	8.24657e+06	1.68162e+06
58.45	I8																								58.45	I8	8.25864e+06	1.65077e+06
65.5667	I9																								65.5667	I9	8.29941e+06	1.69561e+06
73.6	I10																								73.6	I10	8.3268e+06	1.65476e+06
80.7	I11																								80.7	I11	8.32987e+06	1.67541e+06
87.8333	I12																								87.8333	I12	8.29486e+06	1.71285e+06
94.9667	I13																								94.9667	I13	8.34519e+06	1.70974e+06
102.117	I14																								102.117	I14	8.35398e+06	1.71376e+06
109.25	I15																								109.25	I15	8.32763e+06	1.71517e+06
116.383	I16																								116.383	I16	8.34178e+06	1.72456e+06
123.533	I17																								123.533	I17	8.35238e+06	1.71072e+06
130.7	I18																								130.7	I18	8.32413e+06	1.7301e+06
137.817	I19																								137.817	I19	8.32749e+06	1.74006e+06
145.65	I20																								145.65	I20	8.35366e+06	1.75201e+06
152.767	I21																								152.767	I21	8.29729e+06	1.73845e+06
159.9	I22																								159.9	I22	8.33076e+06	1.76029e+06
167.017	I23																								167.017	I23	8.27624e+06	1.78195e+06
174.167	I24																								174.167	I24	8.38434e+06	1.77044e+06
181.3	I25																								181.3	I25	8.31092e+06	1.78904e+06
188.45	I26																								188.45	I26	8.36922e+06	1.78473e+06
195.583	I27																								195.583	I27	8.35329e+06	1.7922e+06
202.717	I28																								202.717	I28	8.35961e+06	1.75803e+06
209.85	I29																								209.85	I29	8.36991e+06	1.76337e+06
217.7	I30																								217.7	I30	8.33606e+06	1.79763e+06
224.833	I31																								224.833	I31	8.3647e+06	1.77111e+06
231.967	I32																								231.967	I32	8.34352e+06	1.79568e+06
239.1	I33																								239.1	I33	8.36505e+06	1.79766e+06
246.233	I34																								246.233	I34	8.36402e+06	1.79276e+06
253.35	I35																								253.35	I35	8.37434e+06	1.82172e+06
260.467	I36																								260.467	I36	8.34306e+06	1.81801e+06
267.583	I37																								267.583	I37	8.48796e+06	1.76391e+06
274.717	I38																								274.717	I38	8.60292e+06	1.76179e+06
281.817	I39																								281.817	I39	8.59537e+06	1.77743e+06
289.717	I40																								289.717	I40	8.57338e+06	1.75559e+06
296.833	I41																								296.833	I41	8.57817e+06	1.71965e+06
303.95	I42																								303.95	I42	8.56047e+06	1.80178e+06
311.083	I43																								311.083	I43	8.51173e+06	1.81476e+06
318.2	I44																								318.2	I44	8.45461e+06	1.85792e+06
325.317	I45																								325.317	I45	8.44676e+06	1.85627e+06
332.433	I46																								332.433	I46	8.42742e+06	1.85351e+06
339.55	I47																								339.55	I47	8.35595e+06	1.8958e+06
346.667	I48																								346.667	I48	8.36526e+06	1.86781e+06
353.783	I49																								353.783	I49	8.42595e+06	1.86244e+06
361.667	I50																								361.667	I50	8.33528e+06	1.87062e+06
time [min]:	Peak name																								time [min]:	Peak name	1	2
0	I0																								0	I0	-10304.9	-32246.8
7.1	I1																								7.1	I1	279533	140979
14.2167	I2																								14.2167	I2	4.65934e+06	981940
21.3333	I3																								21.3333	I3	7.40123e+06	1.47403e+06
28.4667	I4																								28.4667	I4	8.063e+06	1.62184e+06
36.5667	I5																								36.5667	I5	8.24912e+06	1.67705e+06
44.1167	I6																								44.1167	I6	8.18048e+06	1.63398e+06
51.3167	I7																								51.3167	I7	8.24657e+06	1.68162e+06
58.45	I8																								58.45	I8	8.25864e+06	1.65077e+06
65.5667	I9																								65.5667	I9	8.29941e+06	1.69561e+06
73.6	I10																								73.6	I10	8.3268e+06	1.65476e+06
80.7	I11																								80.7	I11	8.32987e+06	1.67541e+06
87.8333	I12																								87.8333	I12	8.29486e+06	1.71285e+06
94.9667	I13																								94.9667	I13	8.34519e+06	1.70974e+06
102.117	I14																								102.117	I14	8.35398e+06	1.71376e+06
109.25	I15																								109.25	I15	8.32763e+06	1.71517e+06
116.383	I16																								116.383	I16	8.34178e+06	1.72456e+06
123.533	I17																								123.533	I17	8.35238e+06	1.71072e+06
130.7	I18																								130.7	I18	8.32413e+06	1.7301e+06
137.817	I19																								137.817	I19	8.32749e+06	1.74006e+06
145.65	I20																								145.65	I20	8.35366e+06	1.75201e+06
152.767	I21																								152.767	I21	8.29729e+06	1.73845e+06
159.9	I22																								159.9	I22	8.33076e+06	1.76029e+06
167.017	I23																								167.017	I23	8.27624e+06	1.78195e+06
174.167	I24																								174.167	I24	8.38434e+06	1.77044e+06
181.3	I25																								181.3	I25	8.31092e+06	1.78904e+06
188.45	I26																								188.45	I26	8.36922e+06	1.78473e+06
195.583	I27																								195.583	I27	8.35329e+06	1.7922e+06
202.717	I28																								202.717	I28	8.35961e+06	1.75803e+06
209.85	I29																								209.85	I29	8.36991e+06	1.76337e+06
217.7	I30																								217.7	I30	8.33606e+06	1.79763e+06
224.833	I31																								224.833	I31	8.3647e+06	1.77111e+06
231.967	I32																								231.967	I32	8.34352e+06	1.79568e+06
239.1	I33																								239.1	I33	8.36505e+06	1.79766e+06
246.233	I34																								246.233	I34	8.36402e+06	1.79276e+06
253.35	I35																								253.35	I35	8.37434e+06	1.82172e+06
260.467	I36																								260.467	I36	8.34306e+06	1.81801e+06
267.583	I37																								267.583	I37	8.48796e+06	1.76391e+06
274.717	I38																								274.717	I38	8.60292e+06	1.76179e+06
281.817	I39																								281.817	I39	8.59537e+06	1.77743e+06
289.717	I40																								289.717	I40	8.57338e+06	1.75559e+06
296.833	I41																								296.833	I41	8.57817e+06	1.71965e+06
303.95	I42																								303.95	I42	8.56047e+06	1.80178e+06
311.083	I43																								311.083	I43	8.51173e+06	1.81476e+06
318.2	I44																								318.2	I44	8.45461e+06	1.85792e+06
325.317	I45																								325.317	I45	8.44676e+06	1.85627e+06
332.433	I46																								332.433	I46	8.42742e+06	1.85351e+06
339.55	I47																								339.55	I47	8.35595e+06	1.8958e+06
346.667	I48																								346.667	I48	8.36526e+06	1.86781e+06
353.783	I49																								353.783	I49	8.42595e+06	1.86244e+06
361.667	I50																								361.667	I50	8.33528e+06	1.87062e+06
time [min]:	Peak name																								time [min]:	Peak name	1	2
0	I0																								0	I0	-10304.9	-32246.8
7.1	I1																								7.1	I1	279533	140979
14.2167	I2																								14.2167	I2	4.65934e+06	981940
21.3333	I3																								21.3333	I3	7.40123e+06	1.47403e+06
28.4667	I4																								28.4667	I4	8.063e+06	1.62184e+06
36.5667	I5																								36.5667	I5	8.24912e+06	1.67705e+06
44.1167	I6																								44.1167	I6	8.18048e+06	1.63398e+06
51.3167	I7																								51.3167	I7	8.24657e+06	1.68162e+06
58.45	I8																								58.45	I8	8.25864e+06	1.65077e+06
65.5667	I9																								65.5667	I9	8.29941e+06	1.69561e+06
73.6	I10																								73.6	I10	8.3268e+06	1.65476e+06
80.7	I11																								80.7	I11	8.32987e+06	1.67541e+06
87.8333	I12																								87.8333	I12	8.29486e+06	1.71285e+06
94.9667	I13																								94.9667	I13	8.34519e+06	1.70974e+06
102.117	I14																								102.117	I14	8.35398e+06	1.71376e+06
109.25	I15																								109.25	I15	8.32763e+06	1.71517e+06
116.383	I16																								116.383	I16	8.34178e+06	1.72456e+06
123.533	I17																								123.533	I17	8.35238e+06	1.71072e+06
130.7	I18																								130.7	I18	8.32413e+06	1.7301e+06
137.817	I19																								137.817	I19	8.32749e+06	1.74006e+06
145.65	I20																								145.65	I20	8.35366e+06	1.75201e+06
152.767	I21																								152.767	I21	8.29729e+06	1.73845e+06
159.9	I22																								159.9	I22	8.33076e+06	1.76029e+06
167.017	I23																								167.017	I23	8.27624e+06	1.78195e+06
174.167	I24																								174.167	I24	8.38434e+06	1.77044e+06
181.3	I25																								181.3	I25	8.31092e+06	1.78904e+06
188.45	I26																								188.45	I26	8.36922e+06	1.78473e+06
195.583	I27																								195.583	I27	8.35329e+06	1.7922e+06
202.717	I28																								202.717	I28	8.35961e+06	1.75803e+06
209.85	I29																								209.85	I29	8.36991e+06	1.76337e+06
217.7	I30																								217.7	I30	8.33606e+06	1.79763e+06
224.833	I31																								224.833	I31	8.3647e+06	1.77111e+06
231.967	I32																								231.967	I32	8.34352e+06	1.79568e+06
239.1	I33																								239.1	I33	8.36505e+06	1.79766e+06
246.233	I34																								246.233	I34	8.36402e+06	1.79276e+06
253.35	I35																								253.35	I35	8.37434e+06	1.82172e+06
260.467	I36																								260.467	I36	8.34306e+06	1.81801e+06
267.583	I37																								267.583	I37	8.48796e+06	1.76391e+06
274.717	I38																								274.717	I38	8.60292e+06	1.76179e+06
281.817	I39																								281.817	I39	8.59537e+06	1.77743e+06
289.717	I40																								289.717	I40	8.57338e+06	1.75559e+06
296.833	I41																								296.833	I41	8.57817e+06	1.71965e+06
303.95	I42																								303.95	I42	8.56047e+06	1.80178e+06
311.083	I43																								311.083	I43	8.51173e+06	1.81476e+06
318.2	I44																								318.2	I44	8.45461e+06	1.85792e+06
325.317	I45																								325.317	I45	8.44676e+06	1.85627e+06
332.433	I46																								332.433	I46	8.42742e+06	1.85351e+06
339.55	I47																								339.55	I47	8.35595e+06	1.8958e+06
346.667	I48																								346.667	I48	8.36526e+06	1.86781e+06
353.783	I49																								353.783	I49	8.42595e+06	1.86244e+06
361.667	I50																								361.667	I50	8.33528e+06	1.87062e+06
time [min]:	Peak name																								time [min]:	Peak name	1	2
0	I0																								0	I0	-10304.9	-32246.8
7.1	I1																								7.1	I1	279533	140979
14.2167	I2																								14.2167	I2	4.65934e+06	981940
21.3333	I3																								21.3333	I3	7.40123e+06	1.47403e+06
28.4667	I4																								28.4667	I4	8.063e+06	1.62184e+06
36.5667	I5																								36.5667	I5	8.24912e+06	1.67705e+06
44.1167	I6																								44.1167	I6	8.18048e+06	1.63398e+06
51.3167	I7																								51.3167	I7	8.24657e+06	1.68162e+06
58.45	I8																								58.45	I8	8.25864e+06	1.65077e+06
65.5667	I9																								65.5667	I9	8.29941e+06	1.69561e+06
73.6	I10																								73.6	I10	8.3268e+06	1.65476e+06
80.7	I11																								80.7	I11	8.32987e+06	1.67541e+06
87.8333	I12																								87.8333	I12	8.29486e+06	1.71285e+06
94.9667	I13																								94.9667	I13	8.34519e+06	1.70974e+06
102.117	I14																								102.117	I14	8.35398e+06	1.71376e+06
109.25	I15																								109.25	I15	8.32763e+06	1.71517e+06
116.383	I16																								116.383	I16	8.34178e+06	1.72456e+06
123.533	I17																								123.533	I17	8.35238e+06	1.71072e+06
130.7	I18																								130.7	I18	8.32413e+06	1.7301e+06
137.817	I19																								137.817	I19	8.32749e+06	1.74006e+06
145.65	I20																								145.65	I20	8.35366e+06	1.75201e+06
152.767	I21																								152.767	I21	8.29729e+06	1.73845e+06
159.9	I22																								159.9	I22	8.33076e+06	1.76029e+06
167.017	I23																								167.017	I23	8.27624e+06	1.78195e+06
174.167	I24																								174.167	I24	8.38434e+06	1.77044e+06
181.3	I25																								181.3	I25	8.31092e+06	1.78904e+06
188.45	I26																								188.45	I26	8.36922e+06	1.78473e+06
195.583	I27																								195.583	I27	8.35329e+06	1.7922e+06
202.717	I28																								202.717	I28	8.35961e+06	1.75803e+06
209.85	I29																								209.85	I29	8.36991e+06	1.76337e+06
217.7	I30																								217.7	I30	8.33606e+06	1.79763e+06
224.833	I31																								224.833	I31	8.3647e+06	1.77111e+06
231.967	I32																								231.967	I32	8.34352e+06	1.79568e+06
239.1	I33																								239.1	I33	8.36505e+06	1.79766e+06
246.233	I34																								246.233	I34	8.36402e+06	1.79276e+06
253.35	I35																								253.35	I35	8.37434e+06	1.82172e+06
260.467	I36																								260.467	I36	8.34306e+06	1.81801e+06
267.583	I37																								267.583	I37	8.48796e+06	1.76391e+06
274.717	I38																								274.717	I38	8.60292e+06	1.76179e+06
281.817	I39																								281.817	I39	8.59537e+06	1.77743e+06
289.717	I40																								289.717	I40	8.57338e+06	1.75559e+06
296.833	I41																								296.833	I41	8.57817e+06	1.71965e+06
303.95	I42																								303.95	I42	8.56047e+06	1.80178e+06
311.083	I43																								311.083	I43	8.51173e+06	1.81476e+06
318.2	I44																								318.2	I44	8.45461e+06	1.85792e+06
325.317	I45																								325.317	I45	8.44676e+06	1.85627e+06
332.433	I46																								332.433	I46	8.42742e+06	1.85351e+06
339.55	I47																								339.55	I47	8.35595e+06	1.8958e+06
346.667	I48																								346.667	I48	8.36526e+06	1.86781e+06
353.783	I49																								353.783	I49	8.42595e+06	1.86244e+06
361.667	I50																								361.667	I50	8.33528e+06	1.87062e+06
time [min]:	Peak name																								time [min]:	Peak name	1	2
0	I0																								0	I0	-10304.9	-32246.8
7.1	I1																								7.1	I1	279533	140979
14.2167	I2																								14.2167	I2	4.65934e+06	981940
21.3333	I3																								21.3333	I3	7.40123e+06	1.47403e+06
28.4667	I4																								28.4667	I4	8.063e+06	1.62184e+06
36.5667	I5																								36.5667	I5	8.24912e+06	1.67705e+06
44.1167	I6																								44.1167	I6	8.18048e+06	1.63398e+06
51.3167	I7																								51.3167	I7	8.24657e+06	1.68162e+06
58.45	I8																								58.45	I8	8.25864e+06	1.65077e+06
65.5667	I9																								65.5667	I9	8.29941e+06	1.69561e+06
73.6	I10																								73.6	I10	8.3268e+06	1.65476e+06
80.7	I11																								80.7	I11	8.32987e+06	1.67541e+06
87.8333	I12																								87.8333	I12	8.29486e+06	1.71285e+06
94.9667	I13																								94.9667	I13	8.34519e+06	1.70974e+06
102.117	I14																								102.117	I14	8.35398e+06	1.71376e+06
109.25	I15																								109.25	I15	8.32763e+06	1.71517e+06
116.383	I16																								116.383	I16	8.34178e+06	1.72456e+06
123.533	I17																								123.533	I17	8.35238e+06	1.71072e+06
130.7	I18																								130.7	I18	8.32413e+06	1.7301e+06
137.817	I19																								137.817	I19	8.32749e+06	1.74006e+06
145.65	I20																								145.65	I20	8.35366e+06	1.75201e+06
152.767	I21																								152.767	I21	8.29729e+06	1.73845e+06
159.9	I22																								159.9	I22	8.33076e+06	1.76029e+06
167.017	I23																								167.017	I23	8.27624e+06	1.78195e+06
174.167	I24																								174.167	I24	8.38434e+06	1.77044e+06
181.3	I25																								181.3	I25	8.31092e+06	1.78904e+06
188.45	I26																								188.45	I26	8.36922e+06	1.78473e+06
195.583	I27																								195.583	I27	8.35329e+06	1.7922e+06
202.717	I28																								202.717	I28	8.35961e+06	1.75803e+06
209.85	I29																								209.85	I29	8.36991e+06	1.76337e+06
217.7	I30																								217.7	I30	8.33606e+06	1.79763e+06
224.833	I31																								224.833	I31	8.3647e+06	1.77111e+06
231.967	I32																								231.967	I32	8.34352e+06	1.79568e+06
239.1	I33																								239.1	I33	8.36505e+06	1.79766e+06
246.233	I34																								246.233	I34	8.36402e+06	1.79276e+06
253.35	I35																								253.35	I35	8.37434e+06	1.82172e+06
260.467	I36																								260.467	I36	8.34306e+06	1.81801e+06
267.583	I37																								267.583	I37	8.48796e+06	1.76391e+06
274.717	I38																								274.717	I38	8.60292e+06	1.76179e+06
281.817	I39																								281.817	I39	8.59537e+06	1.77743e+06
289.717	I40																								289.717	I40	8.57338e+06	1.75559e+06
296.833	I41																								296.833	I41	8.57817e+06	1.71965e+06
303.95	I42																								303.95	I42	8.56047e+06	1.80178e+06
311.083	I43																								311.083	I43	8.51173e+06	1.81476e+06
318.2	I44																								318.2	I44	8.45461e+06	1.85792e+06
325.317	I45																								325.317	I45	8.44676e+06	1.85627e+06
332.433	I46																								332.433	I46	8.42742e+06	1.85351e+06
339.55	I47																								339.55	I47	8.35595e+06	1.8958e+06
346.667	I48																								346.667	I48	8.36526e+06	1.86781e+06
353.783	I49																								353.783	I49	8.42595e+06	1.86244e+06
361.667	I50																								361.667	I50	8.33528e+06	1.87062e+06
time [min]:	Peak name																								time [min]:	Peak name	1	2
0	I0																								0	I0	-10304.9	-32246.8
7.1	I1																								7.1	I1	279533	140979
14.2167	I2																								14.2167	I2	4.65934e+06	981940
21.3333	I3																								21.3333	I3	7.40123e+06	1.47403e+06
28.4667	I4																								28.4667	I4	8.063e+06	1.62184e+06
36.5667	I5																								36.5667	I5	8.24912e+06	1.67705e+06
44.1167	I6																								44.1167	I6	8.18048e+06	1.63398e+06
51.3167	I7																								51.3167	I7	8.24657e+06	1.68162e+06
58.45	I8																								58.45	I8	8.25864e+06	1.65077e+06
65.5667	I9																								65.5667	I9	8.29941e+06	1.69561e+06
73.6	I10																								73.6	I10	8.3268e+06	1.65476e+06
80.7	I11																								80.7	I11	8.32987e+06	1.67541e+06
87.8333	I12																								87.8333	I12	8.29486e+06	1.71285e+06
94.9667	I13																								94.9667	I13	8.34519e+06	1.70974e+06
102.117	I14																								102.117	I14	8.35398e+06	1.71376e+06
109.25	I15																								109.25	I15	8.32763e+06	1.71517e+06
116.383	I16																								116.383	I16	8.34178e+06	1.72456e+06
123.533	I17																								123.533	I17	8.35238e+06	1.71072e+06
130.7	I18																								130.7	I18	8.32413e+06	1.7301e+06
137.817	I19																								137.817	I19	8.32749e+06	1.74006e+06
145.65	I20																								145.65	I20	8.35366e+06	1.75201e+06
152.767	I21																								152.767	I21	8.29729e+06	1.73845e+06
159.9	I22																								159.9	I22	8.33076e+06	1.76029e+06
167.017	I23																								167.017	I23	8.27624e+06	1.78195e+06
174.167	I24																								174.167	I24	8.38434e+06	1.77044e+06
181.3	I25																								181.3	I25	8.31092e+06	1.78904e+06
188.45	I26																								188.45	I26	8.36922e+06	1.78473e+06
195.583	I27																								195.583	I27	8.35329e+06	1.7922e+06
202.717	I28																								202.717	I28	8.35961e+06	1.75803e+06
209.85	I29																								209.85	I29	8.36991e+06	1.76337e+06
217.7	I30																								217.7	I30	8.33606e+06	1.79763e+06
224.833	I31																								224.833	I31	8.3647e+06	1.77111e+06
231.967	I32																								231.967	I32	8.34352e+06	1.79568e+06
239.1	I33																								239.1	I33	8.36505e+06	1.79766e+06
246.233	I34																								246.233	I34	8.36402e+06	1.79276e+06
253.35	I35																								253.35	I35	8.37434e+06	1.82172e+06
260.467	I36																								260.467	I36	8.34306e+06	1.81801e+06
267.583	I37																								267.583	I37	8.48796e+06	1.76391e+06
274.717	I38																								274.717	I38	8.60292e+06	1.76179e+06
281.817	I39																								281.817	I39	8.59537e+06	1.77743e+06
289.717	I40																								289.717	I40	8.57338e+06	1.75559e+06
296.833	I41																								296.833	I41	8.57817e+06	1.71965e+06
303.95	I42																								303.95	I42	8.56047e+06	1.80178e+06
311.083	I43																								311.083	I43	8.51173e+06	1.81476e+06
318.2	I44																								318.2	I44	8.45461e+06	1.85792e+06
325.317	I45																								325.317	I45	8.44676e+06	1.85627e+06
332.433	I46																								332.433	I46	8.42742e+06	1.85351e+06
339.55	I47																								339.55	I47	8.35595e+06	1.8958e+06
346.667	I48																								346.667	I48	8.36526e+06	1.86781e+06
353.783	I49																								353.783	I49	8.42595e+06	1.86244e+06
361.667	I50																								361.667	I50	8.33528e+06	1.87062e+06
time [min]:	Peak name																								time [min]:	Peak name	1	2
0	I0																								0	I0	-10304.9	-32246.8
7.1	I1																								7.1	I1	279533	140979
14.2167	I2																								14.2167	I2	4.65934e+06	981940
21.3333	I3																								21.3333	I3	7.40123e+06	1.47403e+06
28.4667	I4																								28.4667	I4	8.063e+06	1.62184e+06
36.5667	I5																								36.5667	I5	8.24912e+06	1.67705e+06
44.1167	I6																								44.1167	I6	8.18048e+06	1.63398e+06
51.3167	I7																								51.3167	I7	8.24657e+06	1.68162e+06
58.45	I8																								58.45	I8	8.25864e+06	1.65077e+06
65.5667	I9																								65.5667	I9	8.29941e+06	1.69561e+06
73.6	I10																								73.6	I10	8.3268e+06	1.65476e+06
80.7	I11																								80.7	I11	8.32987e+06	1.67541e+06
87.8333	I12																								87.8333	I12	8.29486e+06	1.71285e+06
94.9667	I13																								94.9667	I13	8.34519e+06	1.70974e+06
102.117	I14																								102.117	I14	8.35398e+06	1.71376e+06
109.25	I15																								109.25	I15	8.32763e+06	1.71517e+06
116.383	I16																								116.383	I16	8.34178e+06	1.72456e+06
123.533	I17																								123.533	I17	8.35238e+06	1.71072e+06
130.7	I18																								130.7	I18	8.32413e+06	1.7301e+06
137.817	I19																								137.817	I19	8.32749e+06	1.74006e+06
145.65	I20																								145.65	I20	8.35366e+06	1.75201e+06
152.767	I21																								152.767	I21	8.29729e+06	1.73845e+06
159.9	I22																								159.9	I22	8.33076e+06	1.76029e+06
167.017	I23																								167.017	I23	8.27624e+06	1.78195e+06
174.167	I24																								174.167	I24	8.38434e+06	1.77044e+06
181.3	I25																								181.3	I25	8.31092e+06	1.78904e+06
188.45	I26																								188.45	I26	8.36922e+06	1.78473e+06
195.583	I27																								195.583	I27	8.35329e+06	1.7922e+06
202.717	I28																								202.717	I28	8.35961e+06	1.75803e+06
209.85	I29																								209.85	I29	8.36991e+06	1.76337e+06
217.7	I30																								217.7	I30	8.33606e+06	1.79763e+06
224.833	I31																								224.833	I31	8.3647e+06	1.77111e+06
231.967	I32																								231.967	I32	8.34352e+06	1.79568e+06
239.1	I33																								239.1	I33	8.36505e+06	1.79766e+06
246.233	I34																								246.233	I34	8.36402e+06	1.79276e+06
253.35	I35																								253.35	I35	8.37434e+06	1.82172e+06
260.467	I36																								260.467	I36	8.34306e+06	1.81801e+06
267.583	I37																								267.583	I37	8.48796e+06	1.76391e+06
274.717	I38																								274.717	I38	8.60292e+06	1.76179e+06
281.817	I39																								281.817	I39	8.59537e+06	1.77743e+06
289.717	I40																								289.717	I40	8.57338e+06	1.75559e+06
296.833	I41																								296.833	I41	8.57817e+06	1.71965e+06
303.95	I42																								303.95	I42	8.56047e+06	1.80178e+06
311.083	I43																								311.083	I43	8.51173e+06	1.81476e+06
318.2	I44																								318.2	I44	8.45461e+06	1.85792e+06
325.317	I45																								325.317	I45	8.44676e+06	1.85627e+06
332.433	I46																								332.433	I46	8.42742e+06	1.85351e+06
339.55	I47																								339.55	I47	8.35595e+06	1.8958e+06
346.667	I48																								346.667	I48	8.36526e+06	1.86781e+06
353.783	I49																								353.783	I49	8.42595e+06	1.86244e+06
361.667	I50																								361.667	I50	8.33528e+06	1.87062e+06
time [min]:	Peak name																								time [min]:	Peak name	1	2
0	I0																								0	I0	-10304.9	-32246.8
7.1	I1																								7.1	I1	279533	140979
14.2167	I2																								14.2167	I2	4.65934e+06	981940
21.3333	I3																								21.3333	I3	7.40123e+06	1.47403e+06
28.4667	I4																								28.4667	I4	8.063e+06	1.62184e+06
36.5667	I5																								36.5667	I5	8.24912e+06	1.67705e+06
44.1167	I6																								44.1167	I6	8.18048e+06	1.63398e+06
51.3167	I7																								51.3167	I7	8.24657e+06	1.68162e+06
58.45	I8																								58.45	I8	8.25864e+06	1.65077e+06
65.5667	I9																								65.5667	I9	8.29941e+06	1.69561e+06
73.6	I10																								73.6	I10	8.3268e+06	1.65476e+06
80.7	I11																								80.7	I11	8.32987e+06	1.67541e+06
87.8333	I12																								87.8333	I12	8.29486e+06	1.71285e+06
94.9667	I13																								94.9667	I13	8.34519e+06	1.70974e+06
102.117	I14																								102.117	I14	8.35398e+06	1.71376e+06
109.25	I15																								109.25	I15	8.32763e+06	1.71517e+06
116.383	I16																								116.383	I16	8.34178e+06	1.72456e+06
123.533	I17																								123.533	I17	8.35238e+06	1.71072e+06
130.7	I18																								130.7	I18	8.32413e+06	1.7301e+06
137.817	I19																								137.817	I19	8.32749e+06	1.74006e+06
145.65	I20																								145.65	I20	8.35366e+06	1.75201e+06
152.767	I21																								152.767	I21	8.29729e+06	1.73845e+06
159.9	I22																								159.9	I22	8.33076e+06	1.76029e+06
167.017	I23																								167.017	I23	8.27624e+06	1.78195e+06
174.167	I24																								174.167	I24	8.38434e+06	1.77044e+06
181.3	I25																								181.3	I25	8.31092e+06	1.78904e+06
188.45	I26																								188.45	I26	8.36922e+06	1.78473e+06
195.583	I27																								195.583	I27	8.35329e+06	1.7922e+06
202.717	I28																								202.717	I28	8.35961e+06	1.75803e+06
209.85	I29																								209.85	I29	8.36991e+06	1.76337e+06
217.7	I30																								217.7	I30	8.33606e+06	1.79763e+06
224.833	I31																								224.833	I31	8.3647e+06	1.77111e+06
231.967	I32																								231.967	I32	8.34352e+06	1.79568e+06
239.1	I33																								239.1	I33	8.36505e+06	1.79766e+06
246.233	I34																								246.233	I34	8.36402e+06	1.79276e+06
253.35	I35																								253.35	I35	8.37434e+06	1.82172e+06
260.467	I36																								260.467	I36	8.34306e+06	1.81801e+06
267.583	I37																								267.583	I37	8.48796e+06	1.76391e+06
274.717	I38																								274.717	I38	8.60292e+06	1.76179e+06
281.817	I39																								281.817	I39	8.59537e+06	1.77743e+06
289.717	I40																								289.717	I40	8.57338e+06	1.75559e+06
296.833	I41																								296.833	I41	8.57817e+06	1.71965e+06
303.95	I42																								303.95	I42	8.56047e+06	1.80178e+06
311.083	I43																								311.083	I43	8.51173e+06	1.81476e+06
318.2	I44																								318.2	I44	8.45461e+06	1.85792e+06
325.317	I45																								325.317	I45	8.44676e+06	1.85627e+06
332.433	I46																								332.433	I46	8.42742e+06	1.85351e+06
339.55	I47																								339.55	I47	8.35595e+06	1.8958e+06
346.667	I48																								346.667	I48	8.36526e+06	1.86781e+06
353.783	I49																								353.783	I49	8.42595e+06	1.86244e+06
361.667	I50																								361.667	I50	8.33528e+06	1.87062e+06
time [min]:	Peak name																								time [min]:	Peak name	1	2
0	I0																								0	I0	-10304.9	-32246.8
7.1	I1																								7.1	I1	279533	140979
14.2167	I2																								14.2167	I2	4.65934e+06	981940
21.3333	I3																								21.3333	I3	7.40123e+06	1.47403e+06
28.4667	I4																								28.4667	I4	8.063e+06	1.62184e+06
36.5667	I5																								36.5667	I5	8.24912e+06	1.67705e+06
44.1167	I6																								44.1167	I6	8.18048e+06	1.63398e+06
51.3167	I7																								51.3167	I7	8.24657e+06	1.68162e+06
58.45	I8																								58.45	I8	8.25864e+06	1.65077e+06
65.5667	I9																								65.5667	I9	8.29941e+06	1.69561e+06
73.6	I10																								73.6	I10	8.3268e+06	1.65476e+06
80.7	I11																								80.7	I11	8.32987e+06	1.67541e+06
87.8333	I12																								87.8333	I12	8.29486e+06	1.71285e+06
94.9667	I13																								94.9667	I13	8.34519e+06	1.70974e+06
102.117	I14																								102.117	I14	8.35398e+06	1.71376e+06
109.25	I15																								109.25	I15	8.32763e+06	1.71517e+06
116.383	I16																								116.383	I16	8.34178e+06	1.72456e+06
123.533	I17																								123.533	I17	8.35238e+06	1.71072e+06
130.7	I18																								130.7	I18	8.32413e+06	1.7301e+06
137.817	I19																								137.817	I19	8.32749e+06	1.74006e+06
145.65	I20																								145.65	I20	8.35366e+06	1.75201e+06
152.767	I21																								152.767	I21	8.29729e+06	1.73845e+06
159.9	I22																								159.9	I22	8.33076e+06	1.76029e+06
167.017	I23																								167.017	I23	8.27624e+06	1.78195e+06
174.167	I24																								174.167	I24	8.38434e+06	1.77044e+06
181.3	I25																								181.3	I25	8.31092e+06	1.78904e+06
188.45	I26																								188.45	I26	8.36922e+06	1.78473e+06
195.583	I27																								195.583	I27	8.35329e+06	1.7922e+06
202.717	I28																								202.717	I28	8.35961e+06	1.75803e+06
209.85	I29																								209.85	I29	8.36991e+06	1.76337e+06
217.7	I30																								217.7	I30	8.33606e+06	1.79763e+06
224.833	I31																								224.833	I31	8.3647e+06	1.77111e+06
231.967	I32																								231.967	I32	8.34352e+06	1.79568e+06
239.1	I33																								239.1	I33	8.36505e+06	1.79766e+06
246.233	I34																								246.233	I34	8.36402e+06	1.79276e+06
253.35	I35																								253.35	I35	8.37434e+06	1.82172e+06
260.467	I36																								260.467	I36	8.34306e+06	1.81801e+06
267.583	I37																								267.583	I37	8.48796e+06	1.76391e+06
274.717	I38																								274.717	I38	8.60292e+06	1.76179e+06
281.817	I39																								281.817	I39	8.59537e+06	1.77743e+06
289.717	I40																								289.717	I40	8.57338e+06	1.75559e+06
296.833	I41																								296.833	I41	8.57817e+06	1.71965e+06
303.95	I42																								303.95	I42	8.56047e+06	1.80178e+06
311.083	I43																								311.083	I43	8.51173e+06	1.81476e+06
318.2	I44																								318.2	I44	8.45461e+06	1.85792e+06
325.317	I45																								325.317	I45	8.44676e+06	1.85627e+06
332.433	I46																								332.433	I46	8.42742e+06	1.85351e+06
339.55	I47																								339.55	I47	8.35595e+06	1.8958e+06
346.667	I48																								346.667	I48	8.36526e+06	1.86781e+06
353.783	I49																								353.783	I49	8.42595e+06	1.86244e+06
361.667	I50																								361.667	I50	8.33528e+06	1.87062e+06
time [min]:	Peak name																								time [min]:	Peak name	1	2
0	I0																								0	I0	-10304.9	-32246.8
7.1	I1																								7.1	I1	279533	140979
14.2167	I2																								14.2167	I2	4.65934e+06	981940
21.3333	I3																								21.3333	I3	7.40123e+06	1.47403e+06
28.4667	I4																								28.4667	I4	8.063e+06	1.62184e+06
36.5667	I5																								36.5667	I5	8.24912e+06	1.67705e+06
44.1167	I6																								44.1167	I6	8.18048e+06	1.63398e+06
51.3167	I7																								51.3167	I7	8.24657e+06	1.68162e+06
58.45	I8																								58.45	I8	8.25864e+06	1.65077e+06
65.5667	I9																								65.5667	I9	8.29941e+06	1.69561e+06
73.6	I10																								73.6	I10	8.3268e+06	1.65476e+06
80.7	I11																								80.7	I11	8.32987e+06	1.67541e+06
87.8333	I12																								87.8333	I12	8.29486e+06	1.71285e+06
94.9667	I13																								94.9667	I13	8.34519e+06	1.70974e+06
102.117	I14																								102.117	I14	8.35398e+06	1.71376e+06
109.25	I15																								109.25	I15	8.32763e+06	1.71517e+06
116.383	I16																								116.383	I16	8.34178e+06	1.72456e+06
123.533	I17																								123.533	I17	8.35238e+06	1.71072e+06
130.7	I18																								130.7	I18	8.32413e+06	1.7301e+06
137.817	I19																								137.817	I19	8.32749e+06	1.74006e+06
145.65	I20																								145.65	I20	8.35366e+06	1.75201e+06
152.767	I21																								152.767	I21	8.29729e+06	1.73845e+06
159.9	I22																								159.9	I22	8.33076e+06	1.76029e+06
167.017	I23																								167.017	I23	8.27624e+06	1.78195e+06
174.167	I24																								174.167	I24	8.38434e+06	1.77044e+06
181.3	I25																								181.3	I25	8.31092e+06	1.78904e+06
188.45	I26																								188.45	I26	8.36922e+06	1.78473e+06
195.583	I27																								195.583	I27	8.35329e+06	1.7922e+06
202.717	I28																								202.717	I28	8.35961e+06	1.75803e+06
209.85	I29																								209.85	I29	8.36991e+06	1.76337e+06
217.7	I30																								217.7	I30	8.33606e+06	1.79763e+06
224.833	I31																								224.833	I31	8.3647e+06	1.77111e+06
231.967	I32																								231.967	I32	8.34352e+06	1.79568e+06
239.1	I33																								239.1	I33	8.36505e+06	1.79766e+06
246.233	I34																								246.233	I34	8.36402e+06	1.79276e+06
253.35	I35																								253.35	I35	8.37434e+06	1.82172e+06
260.467	I36																								260.467	I36	8.34306e+06	1.81801e+06
267.583	I37																								267.583	I37	8.48796e+06	1.76391e+06
274.717	I38																								274.717	I38	8.60292e+06	1.76179e+06
281.817	I39																								281.817	I39	8.59537e+06	1.77743e+06
289.717	I40																								289.717	I40	8.57338e+06	1.75559e+06
296.833	I41																								296.833	I41	8.57817e+06	1.71965e+06
303.95	I42																								303.95	I42	8.56047e+06	1.80178e+06
311.083	I43																								311.083	I43	8.51173e+06	1.81476e+06
318.2	I44																								318.2	I44	8.45461e+06	1.85792e+06
325.317	I45																								325.317	I45	8.44676e+06	1.85627e+06
332.433	I46																								332.433	I46	8.42742e+06	1.85351e+06
339.55	I47																								339.55	I47	8.35595e+06	1.8958e+06
346.667	I48																								346.667	I48	8.36526e+06	1.86781e+06
353.783	I49																								353.783	I49	8.42595e+06	1.86244e+06
361.667	I50																								361.667	I50	8.33528e+06	1.87062e+06
time [min]:	Peak name																								time [min]:	Peak name	1	2
0	I0																								0	I0	-10304.9	-32246.8
7.1	I1																								7.1	I1	279533	140979
14.2167	I2																								14.2167	I2	4.65934e+06	981940
21.3333	I3																								21.3333	I3	7.40123e+06	1.47403e+06
28.4667	I4																								28.4667	I4	8.063e+06	1.62184e+06
36.5667	I5																								36.5667	I5	8.24912e+06	1.67705e+06
44.1167	I6																								44.1167	I6	8.18048e+06	1.63398e+06
51.3167	I7																								51.3167	I7	8.24657e+06	1.68162e+06
58.45	I8																								58.45	I8	8.25864e+06	1.65077e+06
65.5667	I9																								65.5667	I9	8.29941e+06	1.69561e+06
73.6	I10																								73.6	I10	8.3268e+06	1.65476e+06
80.7	I11																								80.7	I11	8.32987e+06	1.67541e+06
87.8333	I12																								87.8333	I12	8.29486e+06	1.71285e+06
94.9667	I13																								94.9667	I13	8.34519e+06	1.70974e+06
102.117	I14																								102.117	I14	8.35398e+06	1.71376e+06
109.25	I15																								109.25	I15	8.32763e+06	1.71517e+06
116.383	I16																								116.383	I16	8.34178e+06	1.72456e+06
123.533	I17																								123.533	I17	8.35238e+06	1.71072e+06
130.7	I18																								130.7	I18	8.32413e+06	1.7301e+06
137.817	I19																								137.817	I19	8.32749e+06	1.74006e+06
145.65	I20																								145.65	I20	8.35366e+06	1.75201e+06
152.767	I21																								152.767	I21	8.29729e+06	1.73845e+06
159.9	I22																								159.9	I22	8.33076e+06	1.76029e+06
167.017	I23																								167.017	I23	8.27624e+06	1.78195e+06
174.167	I24																								174.167	I24	8.38434e+06	1.77044e+06
181.3	I25																								181.3	I25	8.31092e+06	1.78904e+06
188.45	I26																								188.45	I26	8.36922e+06	1.78473e+06
195.583	I27																								195.583	I27	8.35329e+06	1.7922e+06
202.717	I28																								202.717	I28	8.35961e+06	1.75803e+06
209.85	I29																								209.85	I29	8.36991e+06	1.76337e+06
217.7	I30																								217.7	I30	8.33606e+06	1.79763e+06
224.833	I31																								224.833	I31	8.3647e+06	1.77111e+06
231.967	I32																								231.967	I32	8.34352e+06	1.79568e+06
239.1	I33																								239.1	I33	8.36505e+06	1.79766e+06
246.233	I34																								246.233	I34	8.36402e+06	1.79276e+06
253.35	I35																								253.35	I35	8.37434e+06	1.82172e+06
260.467	I36																								260.467	I36	8.34306e+06	1.81801e+06
267.583	I37																								267.583	I37	8.48796e+06	1.76391e+06
274.717	I38																								274.717	I38	8.60292e+06	1.76179e+06
281.817	I39																								281.817	I39	8.59537e+06	1.77743e+06
289.717	I40																								289.717	I40	8.57338e+06	1.75559e+06
296.833	I41																								296.833	I41	8.57817e+06	1.71965e+06
303.95	I42																								303.95	I42	8.56047e+06	1.80178e+06
311.083	I43																								311.083	I43	8.51173e+06	1.81476e+06
318.2	I44																								318.2	I44	8.45461e+06	1.85792e+06
325.317	I45																								325.317	I45	8.44676e+06	1.85627e+06
332.433	I46																								332.433	I46	8.42742e+06	1.85351e+06
339.55	I47																								339.55	I47	8.35595e+06	1.8958e+06
346.667	I48																								346.667	I48	8.36526e+06	1.86781e+06
353.783	I49																								353.783	I49	8.42595e+06	1.86244e+06
361.667	I50																								361.667	I50	8.33528e+06	1.87062e+06
time [min]:	Peak name																								time [min]:	Peak name	1	2
0	I0																								0	I0	-10304.9	-32246.8
7.1	I1																								7.1	I1	279533	140979
14.2167	I2																								14.2167	I2	4.65934e+06	981940
21.3333	I3																								21.3333	I3	7.40123e+06	1.47403e+06
28.4667	I4																								28.4667	I4	8.063e+06	1.62184e+06
36.5667	I5																								36.5667	I5	8.24912e+06	1.67705e+06
44.1167	I6																								44.1167	I6	8.18048e+06	1.63398e+06
51.3167	I7																								51.3167	I7	8.24657e+06	1.68162e+06
58.45	I8																								58.45	I8	8.25864e+06	1.65077e+06
65.5667	I9																								65.5667	I9	8.29941e+06	1.69561e+06
73.6	I10																								73.6	I10	8.3268e+06	1.65476e+06
80.7	I11																								80.7	I11	8.32987e+06	1.67541e+06
87.8333	I12																								87.8333	I12	8.29486e+06	1.71285e+06
94.9667	I13																								94.9667	I13	8.34519e+06	1.70974e+06
102.117	I14																								102.117	I14	8.35398e+06	1.71376e+06
109.25	I15																								109.25	I15	8.32763e+06	1.71517e+06
116.383	I16																								116.383	I16	8.34178e+06	1.72456e+06
123.533	I17																								123.533	I17	8.35238e+06	1.71072e+06
130.7	I18																								130.7	I18	8.32413e+06	1.7301e+06
137.817	I19																								137.817	I19	8.32749e+06	1.74006e+06
145.65	I20																								145.65	I20	8.35366e+06	1.75201e+06
152.767	I21																								152.767	I21	8.29729e+06	1.73845e+06
159.9	I22																								159.9	I22	8.33076e+06	1.76029e+06
167.017	I23																								167.017	I23	8.27624e+06	1.78195e+06
174.167	I24																								174.167	I24	8.38434e+06	1.77044e+06
181.3	I25																								181.3	I25	8.31092e+06	1.78904e+06
188.45	I26																								188.45	I26	8.36922e+06	1.78473e+06
195.583	I27																								195.583	I27	8.35329e+06	1.7922e+06
202.717	I28																								202.717	I28	8.35961e+06	1.75803e+06
209.85	I29																								209.85	I29	8.36991e+06	1.76337e+06
217.7	I30																								217.7	I30	8.33606e+06	1.79763e+06
224.833	I31																								224.833	I31	8.3647e+06	1.77111e+06
231.967	I32																								231.967	I32	8.34352e+06	1.79568e+06
239.1	I33																								239.1	I33	8.36505e+06	1.79766e+06
246.233	I34																								246.233	I34	8.36402e+06	1.79276e+06
253.35	I35																								253.35	I35	8.37434e+06	1.82172e+06
260.467	I36																								260.467	I36	8.34306e+06	1.81801e+06
267.583	I37																								267.583	I37	8.48796e+06	1.76391e+06
274.717	I38																								274.717	I38	8.60292e+06	1.76179e+06
281.817	I39																								281.817	I39	8.59537e+06	1.77743e+06
289.717	I40																								289.717	I40	8.57338e+06	1.75559e+06
296.833	I41																								296.833	I41	8.57817e+06	1.71965e+06
303.95	I42																								303.95	I42	8.56047e+06	1.80178e+06
311.083	I43																								311.083	I43	8.51173e+06	1.81476e+06
318.2	I44																								318.2	I44	8.45461e+06	1.85792e+06
325.317	I45																								325.317	I45	8.44676e+06	1.85627e+06
332.433	I46																								332.433	I46	8.42742e+06	1.85351e+06
339.55	I47																								339.55	I47	8.35595e+06	1.8958e+06
346.667	I48																								346.667	I48	8.36526e+06	1.86781e+06
353.783	I49																								353.783	I49	8.42595e+06	1.86244e+06
361.667	I50																								361.667	I50	8.33528e+06	1.87062e+06
time [min]:	Peak name																								time [min]:	Peak name	1	2
0	I0																								0	I0	-10304.9	-32246.8
7.1	I1																								7.1	I1	279533	140979
14.2167	I2																								14.2167	I2	4.65934e+06	981940
21.3333	I3																								21.3333	I3	7.40123e+06	1.47403e+06
28.4667	I4																								28.4667	I4	8.063e+06	1.62184e+06
36.5667	I5																								36.5667	I5	8.24912e+06	1.67705e+06
44.1167	I6																								44.1167	I6	8.18048e+06	1.63398e+06
51.3167	I7																								51.3167	I7	8.24657e+06	1.68162e+06
58.45	I8																								58.45	I8	8.25864e+06	1.65077e+06
65.5667	I9																								65.5667	I9	8.29941e+06	1.69561e+06
73.6	I10																								73.6	I10	8.3268e+06	1.65476e+06
80.7	I11																								80.7	I11	8.32987e+06	1.67541e+06
87.8333	I12																								87.8333	I12	8.29486e+06	1.71285e+06
94.9667	I13																								94.9667	I13	8.34519e+06	1.70974e+06
102.117	I14																								102.117	I14	8.35398e+06	1.71376e+06
109.25	I15																								109.25	I15	8.32763e+06	1.71517e+06
116.383	I16																								116.383	I16	8.34178e+06	1.72456e+06
123.533	I17																								123.533	I17	8.35238e+06	1.71072e+06
130.7	I18																								130.7	I18	8.32413e+06	1.7301e+06
137.817	I19																								137.817	I19	8.32749e+06	1.74006e+06
145.65	I20																								145.65	I20	8.35366e+06	1.75201e+06
152.767	I21																								152.767	I21	8.29729e+06	1.73845e+06
159.9	I22																								159.9	I22	8.33076e+06	1.76029e+06
167.017	I23																								167.017	I23	8.27624e+06	1.78195e+06
174.167	I24																								174.167	I24	8.38434e+06	1.77044e+06
181.3	I25																								181.3	I25	8.31092e+06	1.78904e+06
188.45	I26																								188.45	I26	8.36922e+06	1.78473e+06
195.583	I27																								195.583	I27	8.35329e+06	1.7922e+06
202.717	I28																								202.717	I28	8.35961e+06	1.75803e+06
209.85	I29																								209.85	I29	8.36991e+06	1.76337e+06
217.7	I30																								217.7	I30	8.33606e+06	1.79763e+06
224.833	I31																								224.833	I31	8.3647e+06	1.77111e+06
231.967	I32																								231.967	I32	8.34352e+06	1.79568e+06
239.1	I33																								239.1	I33	8.36505e+06	1.79766e+06
246.233	I34																								246.233	I34	8.36402e+06	1.79276e+06
253.35	I35																								253.35	I35	8.37434e+06	1.82172e+06
260.467	I36																								260.467	I36	8.34306e+06	1.81801e+06
267.583	I37																								267.583	I37	8.48796e+06	1.76391e+06
274.717	I38																								274.717	I38	8.60292e+06	1.76179e+06
281.817	I39																								281.817	I39	8.59537e+06	1.77743e+06
289.717	I40																								289.717	I40	8.57338e+06	1.75559e+06
296.833	I41																								296.833	I41	8.57817e+06	1.71965e+06
303.95	I42																								303.95	I42	8.56047e+06	1.80178e+06
311.083	I43																								311.083	I43	8.51173e+06	1.81476e+06
318.2	I44																								318.2	I44	8.45461e+06	1.85792e+06
325.317	I45																								325.317	I45	8.44676e+06	1.85627e+06
332.433	I46																								332.433	I46	8.42742e+06	1.85351e+06
339.55	I47																								339.55	I47	8.35595e+06	1.8958e+06
346.667	I48																								346.667	I48	8.36526e+06	1.86781e+06
353.783	I49																								353.783	I49	8.42595e+06	1.86244e+06
361.667	I50																								361.667	I50	8.33528e+06	1.87062e+06
time [min]:	Peak name																								time [min]:	Peak name	1	2
0	I0																								0	I0	-10304.9	-32246.8
7.1	I1																								7.1	I1	279533	140979
14.2167	I2																								14.2167	I2	4.65934e+06	981940
21.3333	I3																								21.3333	I3	7.40123e+06	1.47403e+06
28.4667	I4																								28.4667	I4	8.063e+06	1.62184e+06
36.5667	I5																								36.5667	I5	8.24912e+06	1.67705e+06
44.1167	I6																								44.1167	I6	8.18048e+06	1.63398e+06
51.3167	I7																								51.3167	I7	8.24657e+06	1.68162e+06
58.45	I8																								58.45	I8	8.25864e+06	1.65077e+06
65.5667	I9																								65.5667	I9	8.29941e+06	1.69561e+06
73.6	I10																								73.6	I10	8.3268e+06	1.65476e+06
80.7	I11																								80.7	I11	8.32987e+06	1.67541e+06
87.8333	I12																								87.8333	I12	8.29486e+06	1.71285e+06
94.9667	I13																								94.9667	I13	8.34519e+06	1.70974e+06
102.117	I14																								102.117	I14	8.35398e+06	1.71376e+06
109.25	I15																								109.25	I15	8.32763e+06	1.71517e+06
116.383	I16																								116.383	I16	8.34178e+06	1.72456e+06
123.533	I17																								123.533	I17	8.35238e+06	1.71072e+06
130.7	I18																								130.7	I18	8.32413e+06	1.7301e+06
137.817	I19																								137.817	I19	8.32749e+06	1.74006e+06
145.65	I20																								145.65	I20	8.35366e+06	1.75201e+06
152.767	I21																								152.767	I21	8.29729e+06	1.73845e+06
159.9	I22																								159.9	I22	8.33076e+06	1.76029e+06
167.017	I23																								167.017	I23	8.27624e+06	1.78195e+06
174.167	I24																								174.167	I24	8.38434e+06	1.77044e+06
181.3	I25																								181.3	I25	8.31092e+06	1.78904e+06
188.45	I26																								188.45	I26	8.36922e+06	1.78473e+06
195.583	I27																								195.583	I27	8.35329e+06	1.7922e+06
202.717	I28																								202.717	I28	8.35961e+06	1.75803e+06
209.85	I29																								209.85	I29	8.36991e+06	1.76337e+06
217.7	I30																								217.7	I30	8.33606e+06	1.79763e+06
224.833	I31																								224.833	I31	8.3647e+06	1.77111e+06
231.967	I32																								231.967	I32	8.34352e+06	1.79568e+06
239.1	I33																								239.1	I33	8.36505e+06	1.79766e+06
246.233	I34																								246.233	I34	8.36402e+06	1.79276e+06
253.35	I35																								253.35	I35	8.37434e+06	1.82172e+06
260.467	I36																								260.467	I36	8.34306e+06	1.81801e+06
267.583	I37																								267.583	I37	8.48796e+06	1.76391e+06
274.717	I38																								274.717	I38	8.60292e+06	1.76179e+06
281.817	I39																								281.817	I39	8.59537e+06	1.77743e+06
289.717	I40																								289.717	I40	8.57338e+06	1.75559e+06
296.833	I41																								296.833	I41	8.57817e+06	1.71965e+06
303.95	I42																								303.95	I42	8.56047e+06	1.80178e+06
311.083	I43																								311.083	I43	8.51173e+06	1.81476e+06
318.2	I44																								318.2	I44	8.45461e+06	1.85792e+06
325.317	I45																								325.317	I45	8.44676e+06	1.85627e+06
332.433	I46																								332.433	I46	8.42742e+06	1.85351e+06
339.55	I47																								339.55	I47	8.35595e+06	1.8958e+06
346.667	I48																								346.667	I48	8.36526e+06	1.86781e+06
353.783	I49																								353.783	I49	8.42595e+06	1.86244e+06
361.667	I50																								361.667	I50	8.33528e+06	1.87062e+06
time [min]:	Peak name																								time [min]:	Peak name	1	2
0	I0																								0	I0	-10304.9	-32246.8
7.1	I1																								7.1	I1	279533	140979
14.2167	I2																								14.2167	I2	4.65934e+06	981940
21.3333	I3																								21.3333	I3	7.40123e+06	1.47403e+06
28.4667	I4																								28.4667	I4	8.063e+06	1.62184e+06
36.5667	I5																								36.5667	I5	8.24912e+06	1.67705e+06
44.1167	I6																								44.1167	I6	8.18048e+06	1.63398e+06
51.3167	I7																								51.3167	I7	8.24657e+06	1.68162e+06
58.45	I8																								58.45	I8	8.25864e+06	1.65077e+06
65.5667	I9																								65.5667	I9	8.29941e+06	1.69561e+06
73.6	I10																								73.6	I10	8.3268e+06	1.65476e+06
80.7	I11																								80.7	I11	8.32987e+06	1.67541e+06
87.8333	I12																								87.8333	I12	8.29486e+06	1.71285e+06
94.9667	I13																								94.9667	I13	8.34519e+06	1.70974e+06
102.117	I14																								102.117	I14	8.35398e+06	1.71376e+06
109.25	I15																								109.25	I15	8.32763e+06	1.71517e+06
116.383	I16																								116.383	I16	8.34178e+06	1.72456e+06
123.533	I17																								123.533	I17	8.35238e+06	1.71072e+06
130.7	I18																								130.7	I18	8.32413e+06	1.7301e+06
137.817	I19																								137.817	I19	8.32749e+06	1.74006e+06
145.65	I20																								145.65	I20	8.35366e+06	1.75201e+06
152.767	I21																								152.767	I21	8.29729e+06	1.73845e+06
159.9	I22																								159.9	I22	8.33076e+06	1.76029e+06
167.017	I23																								167.017	I23	8.27624e+06	1.78195e+06
174.167	I24																								174.167	I24	8.38434e+06	1.77044e+06
181.3	I25																								181.3	I25	8.31092e+06	1.78904e+06
188.45	I26																								188.45	I26	8.36922e+06	1.78473e+06
195.583	I27																								195.583	I27	8.35329e+06	1.7922e+06
202.717	I28																								202.717	I28	8.35961e+06	1.75803e+06
209.85	I29																								209.85	I29	8.36991e+06	1.76337e+06
217.7	I30																								217.7	I30	8.33606e+06	1.79763e+06
224.833	I31																								224.833	I31	8.3647e+06	1.77111e+06
231.967	I32																								231.967	I32	8.34352e+06	1.79568e+06
239.1	I33																								239.1	I33	8.36505e+06	1.79766e+06
246.233	I34																								246.233	I34	8.36402e+06	1.79276e+06
253.35	I35																								253.35	I35	8.37434e+06	1.82172e+06
260.467	I36																								260.467	I36	8.34306e+06	1.81801e+06
267.583	I37																								267.583	I37	8.48796e+06	1.76391e+06
274.717	I38																								274.717	I38	8.60292e+06	1.76179e+06
281.817	I39																								281.817	I39	8.59537e+06	1.77743e+06
289.717	I40																								289.717	I40	8.57338e+06	1.75559e+06
296.833	I41																								296.833	I41	8.57817e+06	1.71965e+06
303.95	I42																								303.95	I42	8.56047e+06	1.80178e+06
311.083	I43																								311.083	I43	8.51173e+06	1.81476e+06
318.2	I44																								318.2	I44	8.45461e+06	1.85792e+06
325.317	I45																								325.317	I45	8.44676e+06	1.85627e+06
332.433	I46																								332.433	I46	8.42742e+06	1.85351e+06
339.55	I47																								339.55	I47	8.35595e+06	1.8958e+06
346.667	I48																								346.667	I48	8.36526e+06	1.86781e+06
353.783	I49																								353.783	I49	8.42595e+06	1.86244e+06
361.667	I50																								361.667	I50	8.33528e+06	1.87062e+06
time [min]:	Peak name																								time [min]:	Peak name	1	2
0	I0																								0	I0	-10304.9	-32246.8
7.1	I1																								7.1	I1	279533	140979
14.2167	I2																								14.2167	I2	4.65934e+06	981940
21.3333	I3																								21.3333	I3	7.40123e+06	1.47403e+06
28.4667	I4																								28.4667	I4	8.063e+06	1.62184e+06
36.5667	I5																								36.5667	I5	8.24912e+06	1.67705e+06
44.1167	I6																								44.1167	I6	8.18048e+06	1.63398e+06
51.3167	I7																								51.3167	I7	8.24657e+06	1.68162e+06
58.45	I8																								58.45	I8	8.25864e+06	1.65077e+06
65.5667	I9																								65.5667	I9	8.29941e+06	1.69561e+06
73.6	I10																								73.6	I10	8.3268e+06	1.65476e+06
80.7	I11																								80.7	I11	8.32987e+06	1.67541e+06
87.8333	I12																								87.8333	I12	8.29486e+06	1.71285e+06
94.9667	I13																								94.9667	I13	8.34519e+06	1.70974e+06
102.117	I14																								102.117	I14	8.35398e+06	1.71376e+06
109.25	I15																								109.25	I15	8.32763e+06	1.71517e+06
116.383	I16																								116.383	I16	8.34178e+06	1.72456e+06
123.533	I17																								123.533	I17	8.35238e+06	1.71072e+06
130.7	I18																								130.7	I18	8.32413e+06	1.7301e+06
137.817	I19																								137.817	I19	8.32749e+06	1.74006e+06
145.65	I20																								145.65	I20	8.35366e+06	1.75201e+06
152.767	I21																								152.767	I21	8.29729e+06	1.73845e+06
159.9	I22																								159.9	I22	8.33076e+06	1.76029e+06
167.017	I23																								167.017	I23	8.27624e+06	1.78195e+06
174.167	I24																								174.167	I24	8.38434e+06	1.77044e+06
181.3	I25																								181.3	I25	8.31092e+06	1.78904e+06
188.45	I26																								188.45	I26	8.36922e+06	1.78473e+06
195.583	I27																								195.583	I27	8.35329e+06	1.7922e+06
202.717	I28																								202.717	I28	8.35961e+06	1.75803e+06
209.85	I29																								209.85	I29	8.36991e+06	1.76337e+06
217.7	I30																								217.7	I30	8.33606e+06	1.79763e+06
224.833	I31																								224.833	I31	8.3647e+06	1.77111e+06
231.967	I32																								231.967	I32	8.34352e+06	1.79568e+06
239.1	I33																								239.1	I33	8.36505e+06	1.79766e+06
246.233	I34																								246.233	I34	8.36402e+06	1.79276e+06
253.35	I35																								253.35	I35	8.37434e+06	1.82172e+06
260.467	I36																								260.467	I36	8.34306e+06	1.81801e+06
267.583	I37																								267.583	I37	8.48796e+06	1.76391e+06
274.717	I38																								274.717	I38	8.60292e+06	1.76179e+06
281.817	I39																								281.817	I39	8.59537e+06	1.77743e+06
289.717	I40																								289.717	I40	8.57338e+06	1.75559e+06
296.833	I41																								296.833	I41	8.57817e+06	1.71965e+06
303.95	I42																								303.95	I42	8.56047e+06	1.80178e+06
311.083	I43																								311.083	I43	8.51173e+06	1.81476e+06
318.2	I44																								318.2	I44	8.45461e+06	1.85792e+06
325.317	I45																								325.317	I45	8.44676e+06	1.85627e+06
332.433	I46																								332.433	I46	8.42742e+06	1.85351e+06
339.55	I47																								339.55	I47	8.35595e+06	1.8958e+06
346.667	I48																								346.667	I48	8.36526e+06	1.86781e+06
353.783	I49																								353.783	I49	8.42595e+06	1.86244e+06
361.667	I50																								361.667	I50	8.33528e+06	1.87062e+06
time [min]:	Peak name																								time [min]:	Peak name	1	2
0	I0																								0	I0	-10304.9	-32246.8
7.1	I1																								7.1	I1	279533	140979
14.2167	I2																								14.2167	I2	4.65934e+06	981940
21.3333	I3																								21.3333	I3	7.40123e+06	1.47403e+06
28.4667	I4																								28.4667	I4	8.063e+06	1.62184e+06
36.5667	I5																								36.5667	I5	8.24912e+06	1.67705e+06
44.1167	I6																								44.1167	I6	8.18048e+06	1.63398e+06
51.3167	I7																								51.3167	I7	8.24657e+06	1.68162e+06
58.45	I8																								58.45	I8	8.25864e+06	1.65077e+06
65.5667	I9																								65.5667	I9	8.29941e+06	1.69561e+06
73.6	I10																								73.6	I10	8.3268e+06	1.65476e+06
80.7	I11																								80.7	I11	8.32987e+06	1.67541e+06
87.8333	I12																								87.8333	I12	8.29486e+06	1.71285e+06
94.9667	I13																								94.9667	I13	8.34519e+06	1.70974e+06
102.117	I14																								102.117	I14	8.35398e+06	1.71376e+06
109.25	I15																								109.25	I15	8.32763e+06	1.71517e+06
116.383	I16																								116.383	I16	8.34178e+06	1.72456e+06
123.533	I17																								123.533	I17	8.35238e+06	1.71072e+06
130.7	I18																								130.7	I18	8.32413e+06	1.7301e+06
137.817	I19																								137.817	I19	8.32749e+06	1.74006e+06
145.65	I20																								145.65	I20	8.35366e+06	1.75201e+06
152.767	I21																								152.767	I21	8.29729e+06	1.73845e+06
159.9	I22																								159.9	I22	8.33076e+06	1.76029e+06
167.017	I23																								167.017	I23	8.27624e+06	1.78195e+06
174.167	I24																								174.167	I24	8.38434e+06	1.77044e+06
181.3	I25																								181.3	I25	8.31092e+06	1.78904e+06
188.45	I26																								188.45	I26	8.36922e+06	1.78473e+06
195.583	I27																								195.583	I27	8.35329e+06	1.7922e+06
202.717	I28																								202.717	I28	8.35961e+06	1.75803e+06
209.85	I29																								209.85	I29	8.36991e+06	1.76337e+06
217.7	I30																								217.7	I30	8.33606e+06	1.79763e+06
224.833	I31																								224.833	I31	8.3647e+06	1.77111e+06
231.967	I32																								231.967	I32	8.34352e+06	1.79568e+06
239.1	I33																								239.1	I33	8.36505e+06	1.79766e+06
246.233	I34																								246.233	I34	8.36402e+06	1.79276e+06
253.35	I35																								253.35	I35	8.37434e+06	1.82172e+06
260.467	I36																								260.467	I36	8.34306e+06	1.81801e+06
267.583	I37																								267.583	I37	8.48796e+06	1.76391e+06
274.717	I38																								274.717	I38	8.60292e+06	1.76179e+06
281.817	I39																								281.817	I39	8.59537e+06	1.77743e+06
289.717	I40																								289.717	I40	8.57338e+06	1.75559e+06
296.833	I41																								296.833	I41	8.57817e+06	1.71965e+06
303.95	I42																								303.95	I42	8.56047e+06	1.80178e+06
311.083	I43																								311.083	I43	8.51173e+06	1.81476e+06
318.2	I44																								318.2	I44	8.45461e+06	1.85792e+06
325.317	I45																								325.317	I45	8.44676e+06	1.85627e+06
332.433	I46																								332.433	I46	8.42742e+06	1.85351e+06
339.55	I47																								339.55	I47	8.35595e+06	1.8958e+06
346.667	I48																								346.667	I48	8.36526e+06	1.86781e+06
353.783	I49																								353.783	I49	8.42595e+06	1.86244e+06
361.667	I50																								361.667	I50	8.33528e+06	1.87062e+06
time [min]:	Peak name																								time [min]:	Peak name	1	2
0	I0																								0	I0	-10304.9	-32246.8
7.1	I1																								7.1	I1	279533	140979
14.2167	I2																								14.2167	I2	4.65934e+06	981940
21.3333	I3																								21.3333	I3	7.40123e+06	1.47403e+06
28.4667	I4																								28.4667	I4	8.063e+06	1.62184e+06
36.5667	I5																								36.5667	I5	8.24912e+06	1.67705e+06
44.1167	I6																								44.1167	I6	8.18048e+06	1.63398e+06
51.3167	I7																								51.3167	I7	8.24657e+06	1.68162e+06
58.45	I8																								58.45	I8	8.25864e+06	1.65077e+06
65.5667	I9																								65.5667	I9	8.29941e+06	1.69561e+06
73.6	I10																								73.6	I10	8.3268e+06	1.65476e+06
80.7	I11																								80.7	I11	8.32987e+06	1.67541e+06
87.8333	I12																								87.8333	I12	8.29486e+06	1.71285e+06
94.9667	I13																								94.9667	I13	8.34519e+06	1.70974e+06
102.117	I14																								102.117	I14	8.35398e+06	1.71376e+06
109.25	I15																								109.25	I15	8.32763e+06	1.71517e+06
116.383	I16																								116.383	I16	8.34178e+06	1.72456e+06
123.533	I17																								123.533	I17	8.35238e+06	1.71072e+06
130.7	I18																								130.7	I18	8.32413e+06	1.7301e+06
137.817	I19																								137.817	I19	8.32749e+06	1.74006e+06
145.65	I20																								145.65	I20	8.35366e+06	1.75201e+06
152.767	I21																								152.767	I21	8.29729e+06	1.73845e+06
159.9	I22																								159.9	I22	8.33076e+06	1.76029e+06
167.017	I23																								167.017	I23	8.27624e+06	1.78195e+06
174.167	I24																								174.167	I24	8.38434e+06	1.77044e+06
181.3	I25																								181.3	I25	8.31092e+06	1.78904e+06
188.45	I26																								188.45	I26	8.36922e+06	1.78473e+06
195.583	I27																								195.583	I27	8.35329e+06	1.7922e+06
202.717	I28																								202.717	I28	8.35961e+06	1.75803e+06
209.85	I29																								209.85	I29	8.36991e+06	1.76337e+06
217.7	I30																								217.7	I30	8.33606e+06	1.79763e+06
224.833	I31																								224.833	I31	8.3647e+06	1.77111e+06
231.967	I32																								231.967	I32	8.34352e+06	1.79568e+06
239.1	I33																								239.1	I33	8.36505e+06	1.79766e+06
246.233	I34																								246.233	I34	8.36402e+06	1.79276e+06
253.35	I35																								253.35	I35	8.37434e+06	1.82172e+06
260.467	I36																								260.467	I36	8.34306e+06	1.81801e+06
267.583	I37																								267.583	I37	8.48796e+06	1.76391e+06
274.717	I38																								274.717	I38	8.60292e+06	1.76179e+06
281.817	I39																								281.817	I39	8.59537e+06	1.77743e+06
289.717	I40																								289.717	I40	8.57338e+06	1.75559e+06
296.833	I41																								296.833	I41	8.57817e+06	1.71965e+06
303.95	I42																								303.95	I42	8.56047e+06	1.80178e+06
311.083	I43																								311.083	I43	8.51173e+06	1.81476e+06
318.2	I44																								318.2	I44	8.45461e+06	1.85792e+06
325.317	I45																								325.317	I45	8.44676e+06	1.85627e+06
332.433	I46																								332.433	I46	8.42742e+06	1.85351e+06
339.55	I47																								339.55	I47	8.35595e+06	1.8958e+06
346.667	I48																								346.667	I48	8.36526e+06	1.86781e+06
353.783	I49																								353.783	I49	8.42595e+06	1.86244e+06
361.667	I50																								361.667	I50	8.33528e+06	1.87062e+06
time [min]:	Peak name																								time [min]:	Peak name	1	2
0	I0																								0	I0	-10304.9	-32246.8
7.1	I1																								7.1	I1	279533	140979
14.2167	I2																								14.2167	I2	4.65934e+06	981940
21.3333	I3																								21.3333	I3	7.40123e+06	1.47403e+06
28.4667	I4																								28.4667	I4	8.063e+06	1.62184e+06
36.5667	I5																								36.5667	I5	8.24912e+06	1.67705e+06
44.1167	I6																								44.1167	I6	8.18048e+06	1.63398e+06
51.3167	I7																								51.3167	I7	8.24657e+06	1.68162e+06
58.45	I8																								58.45	I8	8.25864e+06	1.65077e+06
65.5667	I9																								65.5667	I9	8.29941e+06	1.69561e+06
73.6	I10																								73.6	I10	8.3268e+06	1.65476e+06
80.7	I11																								80.7	I11	8.32987e+06	1.67541e+06
87.8333	I12																								87.8333	I12	8.29486e+06	1.71285e+06
94.9667	I13																								94.9667	I13	8.34519e+06	1.70974e+06
102.117	I14																								102.117	I14	8.35398e+06	1.71376e+06
109.25	I15																								109.25	I15	8.32763e+06	1.71517e+06
116.383	I16																								116.383	I16	8.34178e+06	1.72456e+06
123.533	I17																								123.533	I17	8.35238e+06	1.71072e+06
130.7	I18																								130.7	I18	8.32413e+06	1.7301e+06
137.817	I19																								137.817	I19	8.32749e+06	1.74006e+06
145.65	I20																								145.65	I20	8.35366e+06	1.75201e+06
152.767	I21																								152.767	I21	8.29729e+06	1.73845e+06
159.9	I22																								159.9	I22	8.33076e+06	1.76029e+06
167.017	I23																								167.017	I23	8.27624e+06	1.78195e+06
174.167	I24																								174.167	I24	8.38434e+06	1.77044e+06
181.3	I25																								181.3	I25	8.31092e+06	1.78904e+06
188.45	I26																								188.45	I26	8.36922e+06	1.78473e+06
195.583	I27																								195.583	I27	8.35329e+06	1.7922e+06
202.717	I28																								202.717	I28	8.35961e+06	1.75803e+06
209.85	I29																								209.85	I29	8.36991e+06	1.76337e+06
217.7	I30																								217.7	I30	8.33606e+06	1.79763e+06
224.833	I31																								224.833	I31	8.3647e+06	1.77111e+06
231.967	I32																								231.967	I32	8.34352e+06	1.79568e+06
239.1	I33																								239.1	I33	8.36505e+06	1.79766e+06
246.233	I34																								246.233	I34	8.36402e+06	1.79276e+06
253.35	I35																								253.35	I35	8.37434e+06	1.82172e+06
260.467	I36																								260.467	I36	8.34306e+06	1.81801e+06
267.583	I37																								267.583	I37	8.48796e+06	1.76391e+06
274.717	I38																								274.717	I38	8.60292e+06	1.76179e+06
281.817	I39																								281.817	I39	8.59537e+06	1.77743e+06
289.717	I40																								289.717	I40	8.57338e+06	1.75559e+06
296.833	I41																								296.833	I41	8.57817e+06	1.71965e+06
303.95	I42																								303.95	I42	8.56047e+06	1.80178e+06
311.083	I43																								311.083	I43	8.51173e+06	1.81476e+06
318.2	I44																								318.2	I44	8.45461e+06	1.85792e+06
325.317	I45																								325.317	I45	8.44676e+06	1.85627e+06
332.433	I46																								332.433	I46	8.42742e+06	1.85351e+06
339.55	I47																								339.55	I47	8.35595e+06	1.8958e+06
346.667	I48																								346.667	I48	8.36526e+06	1.86781e+06
353.783	I49																								353.783	I49	8.42595e+06	1.86244e+06
361.667	I50																								361.667	I50	8.33528e+06	1.87062e+06
time [min]:	Peak name																								time [min]:	Peak name	1	2
0	I0																								0	I0	-10304.9	-32246.8
7.1	I1																								7.1	I1	279533	140979
14.2167	I2																								14.2167	I2	4.65934e+06	981940
21.3333	I3																								21.3333	I3	7.40123e+06	1.47403e+06
28.4667	I4																								28.4667	I4	8.063e+06	1.62184e+06
36.5667	I5																								36.5667	I5	8.24912e+06	1.67705e+06
44.1167	I6																								44.1167	I6	8.18048e+06	1.63398e+06
51.3167	I7																								51.3167	I7	8.24657e+06	1.68162e+06
58.45	I8																								58.45	I8	8.25864e+06	1.65077e+06
65.5667	I9																								65.5667	I9	8.29941e+06	1.69561e+06
73.6	I10																								73.6	I10	8.3268e+06	1.65476e+06
80.7	I11																								80.7	I11	8.32987e+06	1.67541e+06
87.8333	I12																								87.8333	I12	8.29486e+06	1.71285e+06
94.9667	I13																								94.9667	I13	8.34519e+06	1.70974e+06
102.117	I14																								102.117	I14	8.35398e+06	1.71376e+06
109.25	I15																								109.25	I15	8.32763e+06	1.71517e+06
116.383	I16																								116.383	I16	8.34178e+06	1.72456e+06
123.533	I17																								123.533	I17	8.35238e+06	1.71072e+06
130.7	I18																								130.7	I18	8.32413e+06	1.7301e+06
137.817	I19																								137.817	I19	8.32749e+06	1.74006e+06
145.65	I20																								145.65	I20	8.35366e+06	1.75201e+06
152.767	I21																								152.767	I21	8.29729e+06	1.73845e+06
159.9	I22																								159.9	I22	8.33076e+06	1.76029e+06
167.017	I23																								167.017	I23	8.27624e+06	1.78195e+06
174.167	I24																								174.167	I24	8.38434e+06	1.77044e+06
181.3	I25																								181.3	I25	8.31092e+06	1.78904e+06
188.45	I26																								188.45	I26	8.36922e+06	1.78473e+06
195.583	I27																								195.583	I27	8.35329e+06	1.7922e+06
202.717	I28																								202.717	I28	8.35961e+06	1.75803e+06
209.85	I29																								209.85	I29	8.36991e+06	1.76337e+06
217.7	I30																								217.7	I30	8.33606e+06	1.79763e+06
224.833	I31																								224.833	I31	8.3647e+06	1.77111e+06
231.967	I32																								231.967	I32	8.34352e+06	1.79568e+06
239.1	I33																								239.1	I33	8.36505e+06	1.79766e+06
246.233	I34																								246.233	I34	8.36402e+06	1.79276e+06
253.35	I35																								253.35	I35	8.37434e+06	1.82172e+06
260.467	I36																								260.467	I36	8.34306e+06	1.81801e+06
267.583	I37																								267.583	I37	8.48796e+06	1.76391e+06
274.717	I38																								274.717	I38	8.60292e+06	1.76179e+06
281.817	I39																								281.817	I39	8.59537e+06	1.77743e+06
289.717	I40																								289.717	I40	8.57338e+06	1.75559e+06
296.833	I41																								296.833	I41	8.57817e+06	1.71965e+06
303.95	I42																								303.95	I42	8.56047e+06	1.80178e+06
311.083	I43																								311.083	I43	8.51173e+06	1.81476e+06
318.2	I44																								318.2	I44	8.45461e+06	1.85792e+06
325.317	I45																								325.317	I45	8.44676e+06	1.85627e+06
332.433	I46																								332.433	I46	8.42742e+06	1.85351e+06
339.55	I47																								339.55	I47	8.35595e+06	1.8958e+06
346.667	I48																								346.667	I48	8.36526e+06	1.86781e+06
353.783	I49																								353.783	I49	8.42595e+06	1.86244e+06
361.667	I50																								361.667	I50	8.33528e+06	1.87062e+06
time [min]:	Peak name																								time [min]:	Peak name	1	2
0	I0																								0	I0	-10304.9	-32246.8
7.1	I1																								7.1	I1	279533	140979
14.2167	I2																								14.2167	I2	4.65934e+06	981940
21.3333	I3																								21.3333	I3	7.40123e+06	1.47403e+06
28.4667	I4																								28.4667	I4	8.063e+06	1.62184e+06
36.5667	I5																								36.5667	I5	8.24912e+06	1.67705e+06
44.1167	I6																								44.1167	I6	8.18048e+06	1.63398e+06
51.3167	I7																								51.3167	I7	8.24657e+06	1.68162e+06
58.45	I8																								58.45	I8	8.25864e+06	1.65077e+06
65.5667	I9																								65.5667	I9	8.29941e+06	1.69561e+06
73.6	I10																								73.6	I10	8.3268e+06	1.65476e+06
80.7	I11																								80.7	I11	8.32987e+06	1.67541e+06
87.8333	I12																								87.8333	I12	8.29486e+06	1.71285e+06
94.9667	I13																								94.9667	I13	8.34519e+06	1.70974e+06
102.117	I14																								102.117	I14	8.35398e+06	1.71376e+06
109.25	I15																								109.25	I15	8.32763e+06	1.71517e+06
116.383	I16																								116.383	I16	8.34178e+06	1.72456e+06
123.533	I17																								123.533	I17	8.35238e+06	1.71072e+06
130.7	I18																								130.7	I18	8.32413e+06	1.7301e+06
137.817	I19																								137.817	I19	8.32749e+06	1.74006e+06
145.65	I20																								145.65	I20	8.35366e+06	1.75201e+06
152.767	I21																								152.767	I21	8.29729e+06	1.73845e+06
159.9	I22																								159.9	I22	8.33076e+06	1.76029e+06
167.017	I23																								167.017	I23	8.27624e+06	1.78195e+06
174.167	I24																								174.167	I24	8.38434e+06	1.77044e+06
181.3	I25																								181.3	I25	8.31092e+06	1.78904e+06
188.45	I26																								188.45	I26	8.36922e+06	1.78473e+06
195.583	I27																								195.583	I27	8.35329e+06	1.7922e+06
202.717	I28																								202.717	I28	8.35961e+06	1.75803e+06
209.85	I29																								209.85	I29	8.36991e+06	1.76337e+06
217.7	I30																								217.7	I30	8.33606e+06	1.79763e+06
224.833	I31																								224.833	I31	8.3647e+06	1.77111e+06
231.967	I32																								231.967	I32	8.34352e+06	1.79568e+06
239.1	I33																								239.1	I33	8.36505e+06	1.79766e+06
246.233	I34																								246.233	I34	8.36402e+06	1.79276e+06
253.35	I35																								253.35	I35	8.37434e+06	1.82172e+06
260.467	I36																								260.467	I36	8.34306e+06	1.81801e+06
267.583	I37																								267.583	I37	8.48796e+06	1.76391e+06
274.717	I38																								274.717	I38	8.60292e+06	1.76179e+06
281.817	I39																								281.817	I39	8.59537e+06	1.77743e+06
289.717	I40																								289.717	I40	8.57338e+06	1.75559e+06
296.833	I41																								296.833	I41	8.57817e+06	1.71965e+06
303.95	I42																								303.95	I42	8.56047e+06	1.80178e+06
311.083	I43																								311.083	I43	8.51173e+06	1.81476e+06
318.2	I44																								318.2	I44	8.45461e+06	1.85792e+06
325.317	I45																								325.317	I45	8.44676e+06	1.85627e+06
332.433	I46																								332.433	I46	8.42742e+06	1.85351e+06
339.55	I47																								339.55	I47	8.35595e+06	1.8958e+06
346.667	I48																								346.667	I48	8.36526e+06	1.86781e+06
353.783	I49																								353.783	I49	8.42595e+06	1.86244e+06
361.667	I50																								361.667	I50	8.33528e+06	1.87062e+06
time [min]:	Peak name																								time [min]:	Peak name	1	2
0	I0																								0	I0	-10304.9	-32246.8
7.1	I1																								7.1	I1	279533	140979
14.2167	I2																								14.2167	I2	4.65934e+06	981940
21.3333	I3																								21.3333	I3	7.40123e+06	1.47403e+06
28.4667	I4																								28.4667	I4	8.063e+06	1.62184e+06
36.5667	I5																								36.5667	I5	8.24912e+06	1.67705e+06
44.1167	I6																								44.1167	I6	8.18048e+06	1.63398e+06
51.3167	I7																								51.3167	I7	8.24657e+06	1.68162e+06
58.45	I8																								58.45	I8	8.25864e+06	1.65077e+06
65.5667	I9																								65.5667	I9	8.29941e+06	1.69561e+06
73.6	I10																								73.6	I10	8.3268e+06	1.65476e+06
80.7	I11																								80.7	I11	8.32987e+06	1.67541e+06
87.8333	I12																								87.8333	I12	8.29486e+06	1.71285e+06
94.9667	I13																								94.9667	I13	8.34519e+06	1.70974e+06
102.117	I14																								102.117	I14	8.35398e+06	1.71376e+06
109.25	I15																								109.25	I15	8.32763e+06	1.71517e+06
116.383	I16																								116.383	I16	8.34178e+06	1.72456e+06
123.533	I17																								123.533	I17	8.35238e+06	1.71072e+06
130.7	I18																								130.7	I18	8.32413e+06	1.7301e+06
137.817	I19																								137.817	I19	8.32749e+06	1.74006e+06
145.65	I20																								145.65	I20	8.35366e+06	1.75201e+06
152.767	I21																								152.767	I21	8.29729e+06	1.73845e+06
[truncated: 1,046,372+ more rows]

## Sheet: Phosphorus
time [min]:	Peak name	internal standard #1	OPPh3	PPh3	A/B	C	[PPh3]	[OPPh3]	[A/B]	[C	total phosphorus		when phosphorus source is PPH3
0	I0	1.21757e+08	2.4947e+06	4.21146e+08	526452	-712077	139.661	0.276109	0.0226096	-0.0203267	139.982
7.13333	I1	1.21739e+08	4.03711e+06	5.85529e+08	9.40008e+06	3306293	194.202	0.446886	0.403767	0.0943944	195.457		INTERNAL REFERENCE (CF SPECTRUM)			FLOW CALIBRATION
14.2167	I2	1.25537e+08	4.24769e+06	6.93537e+08	2.71614e+07	7.76058e+06	223.066	0.455971	1.13138	0.214861	225.785		Triphenylphosphine mass (g)	0.0264			Triphenylphosphosphate	Peak 1	Peak 2	Peak 3
21.3333	I3	1.25804e+08	4.88113e+06	6.94432e+08	3.75552e+07	8.93163e+06	222.881	0.522858	1.56101	0.246759	226.526		Triphenylphosphine n (moles)	0.000100652		0 mL/min	4.7106e+07	1019112491	4935514	11101407	2720052
28.4667	I4	1.27357e+08	6.49723e+06	6.83396e+08	3.88792e+07	1.0144e+07	216.664	0.687484	1.59634	0.276835	220.544		Reaction Volume (L)	0.0224		4 mL/min	1.30273e+07	7.92691e+07	1.15025e+06	3.33378e+06	1.02344e+06
36.6167	I5	1.26893e+08	6.18848e+06	6.83834e+08	3.67045e+07	9.72679e+06	217.594	0.657205	1.51255	0.266419	221.277		Triphenylphosphine concentration (M)	0.00449339		CF	3.61594	12.8564	4.2908	3.32998	3.32
44.1833	I6	1.24954e+08	7.21296e+06	6.76449e+08	3.68248e+07	8.90012e+06	218.585	0.777892	1.54106	0.24756	222.445		Triphenylphosphine concentration (mM)	4.49339			internal standard			#	acyl cpmplex
51.3333	I7	1.2583e+08	7.96752e+06	6.79181e+08	3.53268e+07	8.78553e+06	217.94	0.853288	1.46808	0.242672	221.73
58.4667	I8	1.25769e+08	8.26254e+06	6.78908e+08	3.63734e+07	1.0756e+07	217.959	0.885314	1.51231	0.297243	221.869
65.6	I9	1.25904e+08	8.42599e+06	6.79676e+08	3.67279e+07	9.47952e+06	217.971	0.901857	1.52541	0.261687	221.924		[Triphenylphosphate] ACTUAL EXPERIMENT
73.6167	I10	1.26728e+08	8.73746e+06	6.83043e+08	3.75849e+07	1.01139e+07	217.627	0.929116	1.55086	0.277385	221.658		Triphenylphosphate mass (g)	0.083	from this reaction
80.7167	I11	1.25355e+08	8.71109e+06	6.81134e+08	3.69856e+07	9.92052e+06	219.396	0.936458	1.54284	0.275061	223.418		Triphenylphosphate n (moles)	0.000254383
87.8667	I12	1.25688e+08	9.1737e+06	6.8174e+08	3.60674e+07	9.66371e+06	219.008	0.983571	1.50055	0.267229	222.992		Reaction Volume (L)	0.0224
95	I13	1.26269e+08	9.71757e+06	6.8418e+08	3.8284e+07	9.11684e+06	218.781	1.03709	1.58544	0.250947	222.989		Triphenylphosphate concentration (M)	0.0113564
102.15	I14	1.26126e+08	9.3615e+06	6.81533e+08	3.81334e+07	1.04381e+07	218.182	1.00023	1.581	0.287642	222.345		Triphenylphosphate concentration (mM)	11.3564
109.267	I15	1.25792e+08	1.01279e+07	6.8391e+08	3.74513e+07	1.02902e+07	219.525	1.08499	1.55684	0.284321	223.723
116.4	I16	1.26811e+08	9.3762e+06	6.8495e+08	3.76103e+07	1.02858e+07	218.091	0.996383	1.55088	0.281914	222.189
123.583	I17	1.26074e+08	9.6129e+06	6.83528e+08	3.73451e+07	1.08229e+07	218.91	1.0275	1.54894	0.298368	223.035
130.717	I18	1.27155e+08	1.03467e+07	684553651	3.74958e+07	1.06655e+07	217.375	1.09654	1.54198	0.291529	221.556
137.833	I19	1.26758e+08	1.04075e+07	6.86176e+08	3.75438e+07	9.58606e+06	218.574	1.10645	1.54879	0.262846	222.778
145.667	I20	1.267e+08	1.06634e+07	6.86482e+08	3.7515e+07	1.11727e+07	218.77	1.13416	1.5483	0.306491	223.001
152.783	I21	1.26898e+08	1.09744e+07	6.84894e+08	3.7392e+07	1.01008e+07	217.924	1.16542	1.54082	0.276652	222.171		when phosphorus source is RhHCOPPh33
159.917	I22	1.26961e+08	1.10989e+07	6.85112e+08	3.77274e+07	1.03324e+07	217.885	1.17806	1.55387	0.282856	222.171
167.033	I23	1.27475e+08	1.0544e+07	6.86624e+08	37289705	9.91938e+06	217.485	1.11465	1.52965	0.270454	221.659		Rh concentration
174.183	I24	1.26917e+08	1.10376e+07	6.85498e+08	3.59733e+07	10676155	218.084	1.17196	1.48214	0.292368	222.22		actual weight (g)	0.0133
181.317	I25	1.27208e+08	1.19764e+07	6.86656e+08	3.77726e+07	1.02959e+07	217.951	1.26872	1.55271	0.281308	222.326		MW RhHCO(PPh3)3 (g/mol)	918.78
188.467	I26	1.26759e+08	1.16146e+07	6.86889e+08	36822866	9.66089e+06	218.798	1.23475	1.51903	0.264894	223.07		MW Rh(acac)(CO)2 (g/mol)	258.03
195.6	I27	1.2728e+08	1.13458e+07	6.87081e+08	3.7451e+07	1.05526e+07	217.963	1.20124	1.53862	0.288159	222.241		Number of mol (n)	5.15444e-05
202.733	I28	1.27464e+08	1.15393e+07	6.86021e+08	3.70982e+07	9.93967e+06	217.313	1.21997	1.52192	0.271031	221.576		actual volume of reaction (L)	0.0211
209.867	I29	1.26595e+08	1.17092e+07	6.87109e+08	3.78301e+07	1.00421e+07	219.152	1.24642	1.56261	0.275704	223.523		[Rh] (M)	0.00244286
217.733	I30	1.26815e+08	1.18555e+07	6.86273e+08	3.68004e+07	1.04988e+07	218.505	1.25981	1.51744	0.287741	222.8		[Rh] (mM)	2.44286		[PPh3]	7.32859
224.85	I31	1.26942e+08	1.15298e+07	6.86495e+08	37494791	9.2654e+06	218.357	1.22397	1.54452	0.253684	222.67
231.983	I32	1.26703e+08	1.16635e+07	6.88528e+08	3.69601e+07	1.06167e+07	219.417	1.2405	1.52537	0.291231	223.708
239.133	I33	1.26837e+08	1.13995e+07	6.88298e+08	3.6431e+07	1.04599e+07	219.113	1.21115	1.50195	0.286626	223.328
246.25	I34	1.275e+08	1.1381e+07	6.89991e+08	3.63633e+07	1.07067e+07	218.508	1.20289	1.49135	0.291863	222.694
253.367	I35	1.27877e+08	1.19571e+07	6.9066e+08	3.68735e+07	1.04386e+07	218.076	1.26006	1.50783	0.283718	222.352
260.483	I36	1.27484e+08	1.20382e+07	6.90381e+08	3.68376e+07	1.18004e+07	218.661	1.27251	1.511	0.321719	222.955
267.6	I37	1.29772e+08	1.28396e+07	7.07326e+08	4.10795e+07	1.0114e+07	220.076	1.3333	1.65528	0.27088	224.72
274.717	I38	1.31247e+08	12356588	7.11012e+08	3.99494e+07	1.06059e+07	218.737	1.26872	1.59165	0.280861	223.189
281.85	I39	1.3085e+08	1.19557e+07	7.11506e+08	40434967	1.10036e+07	219.553	1.23128	1.61589	0.292277	224.017
289.733	I40	1.31479e+08	1.18292e+07	7.14441e+08	4.05967e+07	1.09054e+07	219.405	1.21243	1.61459	0.288284	223.847
296.85	I41	1.30986e+08	1.27939e+07	7.11525e+08	4.05939e+07	1.08263e+07	219.332	1.31624	1.62056	0.28727	223.889
303.983	I42	1.30335e+08	1.30873e+07	712078598	3.98704e+07	1.1499e+07	220.599	1.35315	1.59963	0.306644	225.151
311.1	I43	1.29872e+08	1.33489e+07	710029820	4.04617e+07	1.0544e+07	220.749	1.38511	1.62914	0.282181	225.392
318.217	I44	1.2951e+08	1.31591e+07	7.04572e+08	3.90569e+07	1.06398e+07	219.664	1.36924	1.57698	0.285539	224.187
325.333	I45	1.27718e+08	1.30177e+07	7.00857e+08	3.83806e+07	1.15178e+07	221.571	1.37353	1.5714	0.313438	226.087
332.45	I46	1.2829e+08	1.30552e+07	6.95601e+08	3.71582e+07	1.04565e+07	218.93	1.37135	1.51458	0.283289	223.33
339.55	I47	1.28627e+08	1.31836e+07	6.97197e+08	3.68802e+07	1.11417e+07	218.857	1.38121	1.49931	0.301061	223.237
346.683	I48	1.27892e+08	1.32697e+07	6.93691e+08	3.64923e+07	1.08053e+07	219.007	1.39821	1.49206	0.293649	223.389
353.817	I49	1.28213e+08	1.27752e+07	6.9851e+08	3.75302e+07	9.8843e+06	219.978	1.34275	1.53066	0.267948	224.382
361.683	I50	1.29232e+08	1.29861e+07	7.00046e+08	3.68809e+07	1.16629e+07	218.721	1.35414	1.49231	0.313667	223.06											6.51792
																						7.45221
																						6.90797
																					Object	Integral [abs]	Integral [rel]
																					Integral 1	1.6066e+06	0.7651
																					Integral 2	1.63721e+06	0.7797
																					Integral 3	2.44396e+07	11.6394
																					Object	Integral [abs]	Integral [rel]
																					Integral 1	1.04717e+07	0.8794
																					Integral 2	1.22008e+07	1.0247
																					Integral 3	1.68828e+08	14.1785
