# Supplementary material for: Mapping catalyst activation, turnover speciation and deactivation in Rh/PPh3-catalysed olefin hydroformylation
Source: Royal Society of Chemistry journal article supplement (doi:10.1039/d2cy00312k), 2022-01-01
Supplement: d2cy00312k8.xlsx [file d2cy00312k8.xlsx]

## Sheet: Proton
time [min]:	Peak name	1-hexene #1	1-heptanal #1	2-methylhexanal #1	Hydrogen #2	TMB aromatic #3	TMB methyl #9	1-hexene (other H double bond)	[1-hexene]	[1-heptanal]	[2-methylhexanal]	[Hydrogen]	[TMB aromatic]	[TMB methyl]	[1-hexene (other H double bond)]	Conversion	Regioselectivity n-heptanal	Regioselectivity 2-methylhexanal	PPh3/Rh= 10	total
0.0166667	I0	51883938	36615.2	12255	12617.5	5.66218e+07	2.19168e+08	117092653	521.977	0.437425	0.135095	0.0133549	120.146	96.3249	537.24	0	76.4035	23.5965	3.23792	0.437425	INTERNAL REFERENCE			FLOW CALIBRATION
7.23333	I1	50766866	50038.8	9347.75	-14850.2	5.77848e+07	2.23313e+08	1.15904e+08	501.259	0.586694	0.101134	-0.0154264	120.338	96.3249	521.918	3.96912	85.2967	14.7033	5.80119		1-hexene Volume (mL)	1.3			1-hexene (initial)	1-hexene (end)	1-heptanal (end)	2-methylhexanal (end)	Hydrogen (end)	TMB aromatic (initial)	TMB methyl (initial)	TMB aromatic (end)	TMB methyl (end)	1-hexene (other H double bond)
14.4333	I2	47897876	68947.8	8467.25	8781194	5.59674e+07	2.19515e+08	109870845	481.113	0.822383	0.0931921	9.2797	118.569	96.3249	503.307	7.82874	89.8215	10.1785	8.8246		1-hexene n (moles)	0.0104729		0 mL/min	29142933	4176547	20157390	6.62235e+06	1074285	2.00388e+07	62136918	20500117	6.30756e+07	6.17893e+06
21.55	I3	5.14398e+07	118735	31461	9.7622e+06	5.92392e+07	2.27008e+08	1.1729e+08	499.636	1.36948	0.334837	9.9759	121.359	96.3249	519.56	4.28002	80.3537	19.6463	4.09		Reaction Volume (L)	0.0224		4 mL/min	6.75363e+06	987741	4.8867e+06	1.7202e+06	1.58738e+06	7.57361e+06	3.6012e+07	8.49335e+06	3.78577e+07	1.62179e+06
28.6833	I4	52281004	204878	79813.2	9.58578e+06	6.00202e+07	2.28448e+08	1.1922e+08	504.605	2.34816	0.84409	9.73385	122.183	96.3249	524.778	3.32811	73.5581	26.4419	2.78188		1-hexene (M)	0.467541		CF	4.31515	4.22838	4.12495	3.84975	0.676765	2.64587	1.72545	2.41367	1.66612	3.80995
35.8167	I5	52712491	335839	119697	9.56942e+06	6.05814e+07	2.29681e+08	1.20121e+08	506.039	3.82847	1.2591	9.66509	122.664	96.3249	525.908	3.05339	75.2515	24.7485	3.04065		1-hexene(mM)	467.541
42.9333	I6	5.20317e+07	515087	172473	9436360	60366085	2.2938e+08	118680918	500.159	5.87955	1.81663	9.5432	122.388	96.3249	520.284	4.17993	76.3957	23.6043	3.23652
50.0667	I7	5.23524e+07	748596	279320	9349751	6.07082e+07	2.29382e+08	1.19267e+08	503.238	8.54492	2.94202	9.45554	123.081	96.3249	522.851	3.58996	74.3881	25.6119	2.90444		# is the number of protons of the peak taken for integration			0 mL	static with long delay (flow+ full relaxtion effects)
57.2	I8	5.22654e+07	1.00255e+06	369821	9.35671e+06	60992803	2.30463e+08	119035278	500.044	11.39	3.87696	9.41818	123.078	96.3249	519.386	4.20188	74.6056	25.3944	2.93787		If #>1 the integration will be divided by the number of protons			4 mL	flow with shot delay (flow + poor relaxiation)
64.3167	I9	5.28851e+07	1302982	490639	9232155	6.17147e+07	231369020	120351458	503.992	14.7452	5.1234	9.25642	124.047	96.3249	523.072	3.44551	74.2137	25.7863	2.87802
72.35	I10	5.87236e+07	1.91734e+06	655330	9.01615e+06	64272440	2.34405e+08	1.30746e+08	552.384	21.4166	6.75453	8.92277	127.515	96.3249	560.889	-5.8254	76.0233	23.9767	3.17071						initial CF were calculated under Argon ( the reactor was still no pressurized)
79.4667	I11	54243170	2198638	769534	8943524	6.38939e+07	235420234	1.22991e+08	508.039	24.4528	7.89742	8.81272	126.217	96.3249	525.345	2.67033	75.5878	24.4122	3.09631		INTERNAL REFERENCE STANDARD				final CF were calculated under 10 bar H2/CO ( reactor pressurized)
86.6167	I12	54835479	2.70586e+06	925422	8.83633e+06	6.42251e+07	2.35107e+08	1.2411e+08	514.271	30.1342	9.5099	8.7187	127.04	96.3249	530.832	1.47639	76.0118	23.9882	3.16872		Mass of TMB (g)	0.3629
93.75	I13	5.35544e+07	3.2032e+06	1111707	8.69685e+06	6.4155e+07	235731579	121385447	500.925	35.5783	11.3939	8.55834	126.565	96.3249	517.803	4.03315	75.7433	24.2567	3.12256		Molecular weight of TMB (g/mol)	168.19
100.867	I14	5.27628e+07	3.74655e+06	1291559	8.58484e+06	6.43741e+07	236499040	1.19515e+08	491.919	41.4784	13.1943	8.4207	126.586	96.3249	508.171	5.75854	75.8667	24.1333	3.14366		Moles of TMB (n)	0.00215768
107.983	I15	5.33366e+07	4.41747e+06	1.51829e+06	8.45744e+06	65098423	236640168	120721872	496.972	48.877	15.5013	8.29078	127.934	96.3249	512.995	4.79044	75.9216	24.0784	3.1531		Reaction Volume (L)	0.0224
115.1	I16	52254205	5052800	1.73992e+06	8365853	64977768	2.36655e+08	1.18276e+08	486.857	55.9031	17.763	8.20049	127.688	96.3249	502.57	6.72832	75.8872	24.1128	3.14717		TMB (M)	0.0963249
122.2	I17	5.13875e+07	5.72716e+06	1.98013e+06	8.23772e+06	6.52213e+07	237349726	116476151	477.38	63.1785	20.1561	8.05125	127.792	96.3249	493.473	8.54394	75.8131	24.1869	3.13446		TMB (mM)	96.3249		FLOW CALIBRATION
129.333	I18	47746461	6.15859e+06	2123831	8.20571e+06	6.26963e+07	233570376	1.085e+08	450.732	69.0371	21.9687	8.14973	124.832	96.3249	467.117	13.649	75.8601	24.1399	3.14253						1-hexene (initial)	1-hexene (end)	1-heptanal (end)	2-methylhexanal (end)	Hydrogen (end)	TMB aromatic (initial)	TMB methyl (initial)	TMB aromatic (end)	TMB methyl (end)	1-hexene (other H double bond)
136.433	I19	46773420	6.91265e+06	2378858	8179486	6.27786e+07	233733456	1.06438e+08	441.239	77.436	24.5895	8.11802	124.909	96.3249	457.922	15.4678	75.8987	24.1013	3.14915					0 mL/min	2.78016e+07	7.53593e+06	1.87317e+07	5722346	4.41821e+06	2.16925e+07	6.43757e+07	2.16584e+07	6.12478e+07	1.44223e+07
144.217	I20	49812430	8334421	2.89244e+06	8049478	64141683	2.34984e+08	1.11388e+08	467.407	92.8659	29.7391	7.94648	126.942	96.3249	476.669	10.4546	75.744	24.256	3.12269					4 mL/min	6.11977e+06	1757276	3.67838e+06	1.21779e+06	3.89945e+06	7.34342e+06	3.6664e+07	7.98182e+06	3.63252e+07	3.68713e+06
151.333	I21	4.57583e+07	8.64983e+06	2971773	7880290	6.34882e+07	2.3492e+08	103910275	429.482	96.4063	30.563	7.78156	125.682	96.3249	444.788	17.7202	75.9288	24.0712	3.15435					CF	4.54292	4.28842	5.09238	4.69897	1.13304	2.954	1.75583	2.71347	1.6861	3.91153
158.433	I22	44355078	9365979	3.22651e+06	7.75442e+06	63415927	2.355e+08	1.00854e+08	415.286	104.131	33.1012	7.63841	125.23	96.3249	430.641	20.4398	75.8795	24.1205	3.14584
165.6	I23	44528356	10494266	3.60492e+06	7.62642e+06	64213622	235976146	1.00939e+08	416.068	116.44	36.9087	7.49717	126.55	96.3249	430.138	20.2901	75.9316	24.0684	3.15482
172.717	I24	43701509	11419133	3.95897e+06	7.51055e+06	64604827	236469767	9.91051e+07	407.489	126.438	40.4491	7.36786	127.055	96.3249	421.44	21.9335	75.7626	24.2374	3.12585
179.833	I25	4.17251e+07	12138995	4.19734e+06	7.35933e+06	63946520	2.35855e+08	9.47612e+07	390.075	134.759	42.9963	7.23833	126.088	96.3249	404.019	25.2698	75.8115	24.1885	3.13419
186.967	I26	41411302	1.33385e+07	4.59986e+06	7161872	6.45963e+07	2.36565e+08	9.39094e+07	385.979	147.631	46.9782	7.02298	126.987	96.3249	399.185	26.0544	75.8602	24.1398	3.14254
194.083	I27	40500893	1.42959e+07	4934161	6.97941e+06	64731117	2.36795e+08	9.16981e+07	377.126	158.072	50.3433	6.8374	127.128	96.3249	389.406	27.7504	75.8448	24.1552	3.13989
201.2	I28	38238910	1.49726e+07	5177534	6.84832e+06	6.40106e+07	2.36076e+08	86982888	357.149	166.06	52.9874	6.72941	126.096	96.3249	370.508	31.5777	75.81	24.19	3.13395
208.333	I29	37704868	16252322	5.59131e+06	6.75026e+06	6.45919e+07	236354932	85583735	351.745	180.04	57.1545	6.62523	127.091	96.3249	364.118	32.6129	75.904	24.096	3.15006
216.117	I30	39491662	1.87625e+07	6.42972e+06	6568166	6.58218e+07	2.37031e+08	88144566	367.363	207.255	65.5373	6.42812	129.142	96.3249	373.944	29.6208	75.9754	24.0246	3.16239
223.233	I31	35424577	18612937	6439467	6452543	6.5048e+07	2.3695e+08	8.05234e+07	329.643	205.673	65.6591	6.31713	127.667	96.3249	341.729	36.8473	75.8012	24.1988	3.13244
230.333	I32	3.37212e+07	19469447	6.75236e+06	6331299	6.46112e+07	2.36339e+08	76692572	314.603	215.693	69.0273	6.21444	127.138	96.3249	326.312	39.7287	75.7561	24.2439	3.12475
237.45	I33	32331195	2.06549e+07	7147896	6188008	64746689	2.36987e+08	7.35893e+07	300.811	228.201	72.8712	6.0572	127.056	96.3249	312.253	42.3709	75.7961	24.2039	3.13157
244.583	I34	31011304	2.18982e+07	7.51372e+06	6065273	64855986	237090491	70467085	288.404	241.831	76.5671	5.93446	127.215	96.3249	298.874	44.7478	75.9524	24.0476	3.15842
251.683	I35	2.91876e+07	2.27199e+07	7797483	5.94632e+06	6.41099e+07	235718196	66442037	273.024	252.367	79.9213	5.85195	126.484	96.3249	283.443	47.6943	75.9482	24.0518	3.15769
258.783	I36	2.79013e+07	23928855	8156484	5850986	64276164	2.35949e+08	63448030	260.735	265.535	83.519	5.75248	126.687	96.3249	270.405	50.0485	76.0728	23.9272	3.17934
265.883	I37	26742842	2.53655e+07	8635717	5.71139e+06	64752135	2.36558e+08	6.08072e+07	249.268	280.754	88.1989	5.6008	127.297	96.3249	258.484	52.2454	76.0948	23.9052	3.18319
273	I38	2.56144e+07	2.66636e+07	9102992	5652176	6.49534e+07	236577792	5.83084e+07	238.729	295.096	92.9633	5.54226	127.682	96.3249	247.841	54.2644	76.0441	23.9559	3.17433
280.117	I39	2.40295e+07	2.73881e+07	9.28939e+06	5588509	64401870	235704610	5.46886e+07	224.787	304.237	95.2183	5.50013	127.067	96.3249		56.9354	76.163	23.837	3.19516
287.867	I40	24836856	3.13738e+07	1.0589e+07	5.45147e+06	66253986	237215886	5.56075e+07	230.86	346.292	107.848	5.33108	129.888	96.3249		55.7721	76.2523	23.7477	3.21094
295	I41	21472990	3.01563e+07	10235223	5.34698e+06	65071473	2.36712e+08	48864906	200.018	333.563	104.467	5.24004	127.842	96.3249		61.6807	76.1507	23.8493	3.193
302.1	I42	2.02036e+07	3.14175e+07	10707766	5297006	65311233	237115235	46082902	187.873	346.921	109.104	5.18222	128.095	96.3249		64.0074	76.075	23.925	3.17973
309.167	I43	18896164	32500597	11014891	5231378	65183680	2.36707e+08	43092890	176.018	359.5	112.427	5.12684	128.065	96.3249		66.2786	76.1771	23.8229	3.19763
316.267	I44	17603124	3.34693e+07	11338328	5.16945e+06	6.51692e+07	236855744	40022700	163.871	369.982	115.656	5.06297	127.956	96.3249		68.6058	76.1848	23.8152	3.199
323.35	I45	16374726	34646517	1.17708e+07	5.12437e+06	6.53788e+07	237421041	3.72878e+07	152.072	382.084	119.781	5.00687	128.062	96.3249		70.8661	76.1328	23.8672	3.18985
330.467	I46	15111982	35723995	1.20601e+07	5052680	6.53058e+07	2.36846e+08	34477281	140.686	394.923	123.023	4.9488	128.229	96.3249		73.0475	76.2479	23.7521	3.21015
337.567	I47	13964271	3.69034e+07	12431326	4.98967e+06	65383367	2.36866e+08	31779067	129.99	407.927	126.799	4.88667	128.371	96.3249		75.0966	76.2871	23.7129	3.21711
344.65	I48	1.27317e+07	3.78658e+07	12745410	4998224	65491564	237285577	2.91013e+07	118.307	417.826	129.773	4.8864	128.356	96.3249		77.3347	76.3015	23.6985	3.21967
351.717	I49	11649163	38840676	13135218	4.97632e+06	6.55423e+07	2.37417e+08	2.6702e+07	108.188	428.345	133.668	4.86229	128.384	96.3249		79.2735	76.2162	23.7838	3.20455
359.5	I50	11503285	4.32516e+07	14551474	4.93955e+06	6.69514e+07	2.37806e+08	25947592	106.658	476.209	147.838	4.81847	130.93	96.3249		79.5665	76.3098	23.6902	3.22116
366.583	I51	9628363	41080350	13854951	4.93375e+06	65966113	2.38127e+08	22052998	89.1536	451.694	140.571	4.80633	128.829	96.3249		82.92	76.2654	23.7346	3.21327
374.05	I52	8.8443e+06	4.2847e+07	1.44056e+07	4890453	66861254	2.3874e+08	2.02848e+07	81.6835	469.91	145.783	4.75192	130.242	96.3249		84.3511	76.3221	23.6779	3.22335
381.133	I53	7.74263e+06	4.29802e+07	14428938	4883522	66214591	237682478	1.78198e+07	71.8268	473.467	146.669	4.7663	129.556	96.3249		86.2395	76.3489	23.6511	3.22813
388.217	I54	6.67839e+06	42480122	1.43449e+07	4930717	65005724	236147742	15330049	62.3567	471	146.763	4.84363	128.018	96.3249		88.0537	76.2428	23.7572	3.20926
395.317	I55	5.83194e+06	43008251	1.44821e+07	5.00262e+06	64891700	2.36248e+08	13468864	54.4303	476.653	148.103	4.91218	127.739	96.3249		89.5723	76.2943	23.7057	3.21839
402.433	I56	5293960	44481866	14923669	5095327	6.53217e+07	236285269	12155836	49.4014	492.907	152.595	5.00242	128.565	96.3249		90.5357	76.3603	23.6397	3.23017
409.55	I57	4514235	43819745	14742762	5089757	6.44581e+07	235459416	10465393	42.273	487.273	151.274	5.01448	127.31	96.3249		91.9014	76.3097	23.6903	3.22113
416.65	I58	3.93499e+06	44410241	1.49025e+07	5142693	64680281	2.361e+08	9206395	36.7488	492.499	152.498	5.05288	127.402	96.3249		92.9597	76.3568	23.6432	3.22954
423.75	I59	3468026	4.50711e+07	1.51185e+07	5147397	64995098	236614959	8.11094e+06	32.3173	498.741	154.372	5.0465	127.744	96.3249		93.8087	76.3637	23.6363	3.23078
431.5	I60	3179033	4.84769e+07	16184913	5221983	6.55531e+07	235715371	7.39114e+06	29.7374	538.475	165.891	5.13917	129.333	96.3249		94.3029	76.4481	23.5519	3.24595
438.6	I61	2.46654e+06	45274344	15188028	5242654	64324659	2.3555e+08	6.02132e+06	23.0887	503.255	155.783	5.16313	126.998	96.3249		95.5767	76.3621	23.6379	3.23049
445.7	I62	2174232	45456748	1.52534e+07	5273937	64373114	2.35732e+08	5.19936e+06	20.3368	504.892	156.332	5.18993	126.995	96.3249		96.1039	76.3572	23.6428	3.22961
452.783	I63	1867631	45904657	1.54471e+07	5.34619e+06	64498487	235668381	4547631	17.4737	510.005	158.36	5.26245	127.277	96.3249		96.6524	76.3063	23.6937	3.22054
459.867	I64	1.63496e+06	4.60441e+07	15474097	5346251	64322401	235475567	3955854	15.3093	511.973	158.767	5.26682	127.034	96.3249		97.0671	76.3295	23.6705	3.22467
466.967	I65	1423489	4.64669e+07	15582511	5.31334e+06	64699241	236387073	3465465	13.2778	514.681	159.263	5.21422	127.285	96.3249		97.4563	76.3685	23.6315	3.23164
474.083	I66	1212283	46954266	15737525	5.36398e+06	64903518	236263839	3021007	11.3136	520.351	160.931	5.26666	127.754	96.3249		97.8325	76.3782	23.6218	3.23338
481.183	I67	1017914	46903508	1.57479e+07	5335762	64670433	236284607	2626617	9.49885	519.743	161.023	5.23849	127.284	96.3249		98.1802	76.3468	23.6532	3.22775
488.283	I68	883576	4.75109e+07	1.5891e+07	5.30808e+06	65041114	236970002	2255234	8.22141	524.951	162.016	5.19624	127.643	96.3249		98.4249	76.4157	23.5843	3.24011
495.4	I69	783984	4.74775e+07	15939979	5311688	6.51183e+07	2.37101e+08	2.00842e+06	7.29071	524.293	162.426	5.1969	127.724	96.3249		98.6033	76.3475	23.6525	3.22788
503.3	I70	680304	5.10325e+07	16963251	5380110	6.59235e+07	2.37148e+08	1.7984e+06	6.32527	563.438	172.819	5.2628	129.278	96.3249		98.7882	76.5274	23.4726	3.26028
510.4	I71	523227	4.78968e+07	16065966	5.31106e+06	6.51151e+07	2.37431e+08	1466651	4.85902	528.188	163.483	5.18907	127.54	96.3249		99.0691	76.3641	23.6359	3.23085
517.517	I72	397049	47984137	16187283	5.30759e+06	6.52533e+07	2.3768e+08	1.28657e+06	3.68338	528.596	164.544	5.18024	127.677	96.3249		99.2943	76.261	23.739	3.21249
524.617	I73	356990	47153475	1.57883e+07	5435757	64426352	236144257	1.12523e+06	3.3333	522.824	161.532	5.33983	126.879	96.3249		99.3614	76.3965	23.6035	3.23666
531.717	I74	284110	47377907	15925861	5443700	6.46189e+07	2.36266e+08	980709	2.65143	525.041	162.856	5.34488	127.192	96.3249		99.492	76.3256	23.6744	3.22397
538.833	I75	283186	4.77011e+07	15977359	5.43568e+06	6.48525e+07	2.36659e+08	906638	2.63843	527.745	163.111	5.32815	127.44	96.3249		99.4945	76.39	23.61	3.23549
545.967	I76	247896	4.76532e+07	1.59807e+07	5430635	6.45773e+07	2.36132e+08	841016	2.31479	528.392	163.509	5.33508	127.183	96.3249		99.5565	76.3681	23.6319	3.23157
553.067	I77	178696	47585505	1.59474e+07	5.43721e+06	64599883	2.36395e+08	745788	1.66675	527.055	162.988	5.33561	127.086	96.3249		99.6807	76.3801	23.6199	3.23372
560.2	I78	131625	47679696	1.59687e+07	5426719	6.47192e+07	236892733	658286	1.22513	526.988	162.861	5.31411	127.053	96.3249		99.7653	76.3917	23.6083	3.23581
567.333	I79	118372	47993798	1.61158e+07	5406731	64976189	2.3706e+08	624793	1.101	530.086	164.246	5.29081	127.467	96.3249		99.7891	76.3447	23.6553	3.22739
575.117	I80	108850	51068325	1.70659e+07	5.41722e+06	6.57144e+07	2.37271e+08	588512	1.01153	563.541	173.774	5.29635	128.801	96.3249		99.8062	76.4315	23.5685	3.24295
582.217	I81	55524	4.74499e+07	1.58654e+07	5405483	64565606	2.36941e+08	528906	0.516697	524.341	161.775	5.29224	126.725	96.3249		99.901	76.4216	23.5784	3.24117
589.367	I82	50828.5	47609737	15912378	5435061	64574495	2.36666e+08	496914	0.473552	526.72	162.443	5.32739	126.89	96.3249		99.9093	76.4289	23.5711	3.24249
596.467	I83	35304	46638962	15615332	5386527	63786245	235530969	445916	0.3305	518.465	160.179	5.30525	125.945	96.3249		99.9367	76.3973	23.6027	3.2368
603.583	I84	40191	4.69543e+07	1.57224e+07	5381844	6.40764e+07	236209617	432478	0.375169	520.471	160.814	5.28541	126.154	96.3249		99.9281	76.3955	23.6045	3.23649
610.7	I85	61265.5	47150572	1.57985e+07	5.37873e+06	6.40905e+07	236252551	408648	0.571788	522.552	161.563	5.28139	126.159	96.3249		99.8905	76.3837	23.6163	3.23436
617.817	I86	65263.5	47069188	1.57544e+07	5385031	64193765	236146767	381128	0.609374	521.884	161.184	5.28995	126.419	96.3249		99.8833	76.4029	23.5971	3.23781
624.933	I87	48018.5	4.74475e+07	15931429	5365147	6.4604e+07	236942562	404192	0.446849	524.312	162.448	5.25271	126.8	96.3249		99.9144	76.3458	23.6542	3.22758
632.05	I88	17973.5	4.74601e+07	1.59171e+07	5.32357e+06	64542298	237305865	375133	0.167001	523.647	162.053	5.20403	126.485	96.3249		99.968	76.3668	23.6332	3.23134
639.15	I89	499	47460864	1.59322e+07	5357964	64294381	2.36459e+08	328919	0.00465307	525.531	162.788	5.25641	126.45	96.3249		99.9991	76.35	23.65	3.22833
646.933	I90	62990	5.11797e+07	1.70314e+07	5469071	65727848	2.37917e+08	356872	0.583769	563.236	172.952	5.33252	128.477	96.3249		99.8882	76.5071	23.4929	3.2566
654.05	I91	31762	4.78921e+07	16069327	5335714	64907799	237912039	338544	0.294365	527.068	163.186	5.20261	126.877	96.3249		99.9436	76.3586	23.6414	3.22986
661.167	I92	28127	47944861	1.61085e+07	5345505	6.50451e+07	2.37793e+08	337452	0.260808	527.913	163.666	5.21477	127.209	96.3249		99.95	76.3344	23.6656	3.22555
668.267	I93	47760	4.8161e+07	1.61781e+07	5.33091e+06	6.51512e+07	2.38348e+08	312192	0.441822	529.057	163.99	5.18841	127.12	96.3249		99.9154	76.3378	23.6622	3.22615
675.367	I94	14845	4.80661e+07	1.60947e+07	5339504	65262601	2.38849e+08	316990	0.137041	526.907	162.803	5.18588	127.07	96.3249		99.9737	76.3955	23.6045	3.23647
682.467	I95	18059.5	4.79653e+07	16095978	5.30501e+06	65087560	2.38243e+08	300443	0.16714	527.14	163.229	5.16548	127.052	96.3249		99.968	76.3562	23.6438	3.22944
689.583	I96	-7660.5	48117559	16144969	5.28199e+06	65198871	2.38722e+08	260264	-0.0707554	527.752	163.398	5.13274	127.013	96.3249		100.014	76.3586	23.6414	3.22986
696.7	I97	43392	48454059	16186418	5.32553e+06	6.55674e+07	239000086	327044	0.40032	530.825	163.627	5.16904	127.583	96.3249		99.9233	76.438	23.562	3.24412
703.8	I98	33705.5	48182315	16210989	5.28429e+06	6.52357e+07	2.3826e+08	318454	0.311921	529.487	164.384	5.14494	127.332	96.3249		99.9402	76.3091	23.6909	3.22104
710.917	I99	30640.5	4.80838e+07	16126498	5.22742e+06	65116695	238451454	300090	0.283329	527.98	163.396	5.08548	126.997	96.3249		99.9457	76.3665	23.6335	3.23129
718.7	I100	54584.5	5.20035e+07	17311715	5274664	6.66678e+07	239769036	348735	0.501963	567.882	174.441	5.10325	129.308	96.3249		99.9038	76.5007	23.4993	3.25544
725.833	I101	13104	4.82444e+07	16183055	5246471	65329021	2.38935e+08	298208	0.120926	528.671	163.637	5.09368	127.153	96.3249		99.9768	76.3635	23.6365	3.23075
732.95	I102	29875.5	4.85482e+07	1.62903e+07	5.22803e+06	6.56638e+07	2.3973e+08	298402	0.274782	530.237	164.175	5.05895	127.381	96.3249		99.9474	76.3576	23.6424	3.2297
740.033	I103	12478	48424437	1.62483e+07	5.28602e+06	6.56851e+07	240195996	309670	0.114545	527.859	163.434	5.10515	127.176	96.3249		99.9781	76.3582	23.6418	3.2298
747.167	I104	25860.5	48489812	1.62748e+07	5196105	6.55476e+07	239405474	295642	0.238176	530.317	164.242	5.03488	127.328	96.3249		99.9544	76.3531	23.6469	3.22888
754.267	I105	1864	48477687	16277872	5213158	6.53931e+07	238880795	300124	0.0172052	531.349	164.633	5.0625	127.307	96.3249		99.9967	76.3452	23.6548	3.22747
761.383	I106	19370.5	48455722	16257964	5.17461e+06	65449116	239030951	287480	0.178683	530.774	164.329	5.02191	127.336	96.3249		99.9658	76.3591	23.6409	3.22995
768.5	I107	35201	48616433	16297543	5.15744e+06	6.55854e+07	2.39262e+08	321538	0.324396	532.019	164.569	5.00039	127.478	96.3249		99.9379	76.375	23.625	3.2328
775.633	I108	22580.5	48662442	16365677	5262709	6.57728e+07	239673985	289442	0.207734	531.609	164.974	5.0937	127.623	96.3249		99.9602	76.3167	23.6833	3.22239
782.733	I109	-14963.5	4.86271e+07	16344486	5166476	6.57933e+07	2.40011e+08	317862	-0.137467	530.476	164.528	4.99353	127.483	96.3249		100.026	76.327	23.673	3.22422
790.683	I110	-18246.5	5.23345e+07	17494935	5.21062e+06	66830078	2.40714e+08	282950	-0.167138	569.254	175.595	5.0215	129.114	96.3249		100.032	76.4254	23.5746	3.24185
797.8	I111	19837	4.88411e+07	16441719	5162991	6.56723e+07	2.39845e+08	291080	0.182364	533.179	165.622	4.99362	127.337	96.3249		99.9651	76.2992	23.7008	3.21926
806.017	I112	40417.5	4.85085e+07	1.63132e+07	5.15545e+06	6.55545e+07	2.38855e+08	311316	0.373105	531.744	165.008	5.007	127.635	96.3249		99.9285	76.3175	23.6825	3.22252
813.117	I113	48190.5	48428176	1.62374e+07	5124983	6.55625e+07	239497798	302654	0.443665	529.438	163.801	4.96405	127.308	96.3249		99.915	76.3717	23.6283	3.23221
820.2	I114	16139	4.85368e+07	1.62622e+07	5.11608e+06	65595565	2.39917e+08	311839	0.148324	529.698	163.764	4.94676	127.15	96.3249		99.9716	76.3846	23.6154	3.23452
827.317	I115	19513.5	4.86512e+07	1.63563e+07	5.15846e+06	65932735	2.40736e+08	305246	0.178727	529.142	164.152	4.97078	127.369	96.3249		99.9658	76.3229	23.6771	3.22349
834.433	I116	28145	4.90789e+07	16497728	5.12279e+06	6.62266e+07	241343208	275502	0.257135	532.45	165.155	4.92398	127.614	96.3249		99.9507	76.3255	23.6745	3.22395
841.55	I117	17394.5	48643233	1.63756e+07	5.07475e+06	6.59328e+07	2.40576e+08	305778	0.159424	529.405	164.455	4.89336	127.453	96.3249		99.9695	76.2986	23.7014	3.21916
848.667	I118	28685	48624392	1.62946e+07	5.07779e+06	65727972	239907344	302542	0.263637	530.676	164.098	4.90994	127.412	96.3249		99.9495	76.3812	23.6188	3.23391
855.817	I119	31623.5	48778721	16400676	5.05215e+06	65787738	2.39915e+08	302343	0.290636	532.344	165.161	4.885	127.524	96.3249		99.9443	76.3212	23.6788	3.22319
863.633	I120	7845.5	52337730	17536135	5.00418e+06	6.6946e+07	2.40957e+08	308344	0.0717922	568.715	175.831	4.81769	129.207	96.3249		99.9862	76.3841	23.6159	3.23444
870.75	I121	7302	48893212	1.64211e+07	4.9989e+06	66065098	241062631	338866	0.0667894	531.053	164.579	4.81049	127.451	96.3249		99.9872	76.3411	23.6589	3.22674
877.9	I122	18249.5	4.95031e+07	1.65836e+07	5.02711e+06	6.64273e+07	241692839	319718	0.166488	536.275	165.774	4.82502	127.816	96.3249		99.9681	76.3871	23.6129	3.23498
885.033	I123	-10201.5	48770569	1.64186e+07	4.97529e+06	6.58453e+07	240447721	294161	-0.0935489	531.075	164.975	4.80002	127.352	96.3249		100.018	76.2984	23.7016	3.21913
892.167	I124	-3791.5	48799606	16467219	4956157	65812548	2.4017e+08	296202	-0.0348088	532.007	165.655	4.7871	127.436	96.3249		100.007	76.2557	23.7443	3.21154
899.283	I125	2010.5	49037185	1.64766e+07	4912355	65908262	2.40412e+08	299102	0.0184392	534.057	165.582	4.74	127.493	96.3249		99.9965	76.3333	23.6667	3.22534
906.4	I126	29739.5	4.92028e+07	1.64796e+07	4.87854e+06	66209238	240116311	314913	0.273091	536.521	165.816	4.71317	128.233	96.3249		99.9477	76.3908	23.6092	3.23564
913.5	I127	31650.5	48975286	1.64935e+07	4.92834e+06	66058839	240704191	295834	0.289929	532.736	165.55	4.74965	127.629	96.3249		99.9445	76.2919	23.7081	3.21797
920.633	I128	26441.5	49105997	1.6233e+07	4.88318e+06	66040204	2.40983e+08	295952	0.241933	533.539	162.747	4.70068	127.445	96.3249		99.9537	76.6264	23.3736	3.27834

## Sheet: Hydride
time [min]:	Peak name	A/B	C	Riv 1	Riv 2	[A/B]	[C]	Sum Hyds	%			1	2
0.0166667	I0	-11545.4		-265.88	0	-0.00206251	0	-0.00206251	-0.087048	RG Calibration				Flow Calibration
7.18333	I1	28053.5		646.047	0	0.00501158	0	0.00501158	0.211513		Hyd 1	Hyd 2			Hyd1	Hyd 2	1-hexene
14.3167	I2	60317.3		1389.06	0	0.0107753	0	0.0107753	0.454771	CF	0.9894	0.9894		0 mL/min	2.04628e+06	1	29142933
21.4333	I3	95891.6		2208.3	0	0.0171304	0	0.0171304	0.722988	RG Hyd	203	203		4 mL/min	933902	1	6.75363e+06
28.5667	I4	93982.2		2164.33	0	0.0167893	0	0.0167893	0.708593	RG 1H	4.5	4.5		CF	1.05	1.05	4.31515
35.6833	I5	142010		3270.37	0	0.0253692	0	0.0253692	1.07071	Int TMB	1.11756e+08	9.54712e+07
42.8	I6	143111		3295.71	0	0.0255658	0	0.0255658	1.079	[TMB]	96.3249	96.3249
49.95	I7	171209		3942.79	0	0.0305854	0	0.0305854	1.29085
57.0667	I8	201703		4645.05	0	0.036033	0	0.036033	1.52077	IRF	45.5944	45.5944
64.2	I9	245582		5655.55	0	0.0438717	0	0.0438717	1.8516
72.2167	I10	266690		6141.64	0	0.0476425	0	0.0476425	2.01075
79.35	I11	301828		6950.84	0	0.0539197	0	0.0539197	2.27567
86.5167	I12	305094		7026.06	0	0.0545032	0	0.0545032	2.3003
93.6333	I13	330999		7622.62	0	0.0591309	0	0.0591309	2.49561
100.75	I14	361116		8316.19	0	0.0645111	0	0.0645111	2.72269
107.867	I15	370931		8542.23	0	0.0662646	0	0.0662646	2.79669
114.983	I16	393086		9052.43	0	0.0702223	0	0.0702223	2.96373
122.083	I17	435856		10037.4	0	0.077863	0	0.077863	3.2862
129.2	I18	431431		9935.47	0	0.0770724	0	0.0770724	3.25283
136.317	I19	468080		10779.5	0	0.0836196	0	0.0836196	3.52916
144.083	I20	493304		11360.4	0	0.0881257	0	0.0881257	3.71934
151.2	I21	508169		11702.7	0	0.0907812	0	0.0907812	3.83141
158.317	I22	526678		12128.9	0	0.0940877	0	0.0940877	3.97096
165.467	I23	543024		12505.4	0	0.0970078	0	0.0970078	4.09421
172.583	I24	593885		13676.7	0	0.106094	0	0.106094	4.47768
179.717	I25	595268		13708.5	0	0.106341	0	0.106341	4.48811
186.85	I26	655303		15091.1	0	0.117066	0	0.117066	4.94075
193.983	I27	687806		15839.6	0	0.122872	0	0.122872	5.18581
201.083	I28	706757		16276	0	0.126258	0	0.126258	5.32869
208.233	I29	732375		16866	0	0.130834	0	0.130834	5.52184
215.983	I30	777477		17904.6	0	0.138891	0	0.138891	5.8619
223.1	I31	786982		18123.5	0	0.140589	0	0.140589	5.93357
230.217	I32	823167		18956.8	0	0.147054	0	0.147054	6.20638
237.35	I33	877710		20212.9	0	0.156797	0	0.156797	6.61762
244.45	I34	873735		20121.4	0	0.156087	0	0.156087	6.58765
251.55	I35	928645		21385.9	0	0.165897	0	0.165897	7.00165
258.65	I36	968473		22303.1	0	0.173012	0	0.173012	7.30194
265.75	I37	1.00889e+06		23233.8	0	0.180231	0	0.180231	7.60664
272.867	I38	1.05099e+06		24203.3	0	0.187752	0	0.187752	7.92407
279.983	I39	1.06634e+06		24556.9	0	0.190495	0	0.190495	8.03984
287.733	I40	1.13212e+06		26071.8	0	0.202246	0	0.202246	8.53579
294.867	I41	1.17694e+06		27104	0	0.210254	0	0.210254	8.87374			Rh concentration
301.967	I42	1.18776e+06		27353.1	0	0.212186	0	0.212186	8.95528			actual weight (g)	0.0129
309.05	I43	1.25437e+06		28887	0	0.224085	0	0.224085	9.45747			MW RhHCO(PPh3)3 (g/mol)	918.78
316.133	I44	1.32084e+06		30417.9	0	0.23596	0	0.23596	9.95868			MW Rh(acac)(CO)2 (g/mol)	258.03
323.233	I45	1.36997e+06		31549.3	0	0.244737	0	0.244737	10.3291			Number of mol (n)	4.99942e-05
330.333	I46	1.39753e+06		32183.9	0	0.24966	0	0.24966	10.5369			actual volume of reaction (L)	0.0211
337.433	I47	1.44302e+06		33231.6	0	0.257787	0	0.257787	10.8799			[Rh] (M)	0.00236939
344.5	I48	1.51872e+06		34974.9	0	0.27131	0	0.27131	11.4506			[Rh] (mM)	2.36939
351.6	I49	1.55766e+06		35871.5	0	0.278266	0	0.278266	11.7442
359.367	I50	1.61035e+06		37084.9	0	0.287678	0	0.287678	12.1414
366.45	I51	1.6708e+06		38477	0	0.298477	0	0.298477	12.5972
373.917	I52	1.72396e+06		39701.4	0	0.307976	0	0.307976	12.9981
381	I53	1.78654e+06		41142.5	0	0.319154	0	0.319154	13.4699
388.1	I54	1.83233e+06		42197	0	0.327335	0	0.327335	13.8151
395.183	I55	1.88078e+06		43312.7	0	0.335989	0	0.335989	14.1804
402.333	I56	1.93937e+06		44661.9	0	0.346456	0	0.346456	14.6221			16.8971
409.433	I57	1.95744e+06		45078.1	0	0.349684	0	0.349684	14.7584
416.533	I58	2.03413e+06		46844.3	0	0.363385	0	0.363385	15.3366
423.617	I59	2.05483e+06		47320.9	0	0.367082	0	0.367082	15.4927
431.383	I60	2.08209e+06		47948.6	0	0.371951	0	0.371951	15.6982
438.483	I61	2.14381e+06		49370	0	0.382978	0	0.382978	16.1635
445.567	I62	2.15881e+06		49715.6	0	0.385658	0	0.385658	16.2767
452.65	I63	2.1994e+06		50650.4	0	0.39291	0	0.39291	16.5827
459.75	I64	2.18152e+06		50238.4	0	0.389714	0	0.389714	16.4478
466.85	I65	2.24113e+06		51611.3	0	0.400364	0	0.400364	16.8973
473.95	I66	2.23623e+06		51498.4	0	0.399488	0	0.399488	16.8604
481.05	I67	2.24065e+06		51600.2	0	0.400278	0	0.400278	16.8937
488.167	I68	2.25242e+06		51871.2	0	0.40238	0	0.40238	16.9824
495.283	I69	2.26362e+06		52129.3	0	0.404382	0	0.404382	17.0669
503.167	I70	2.27654e+06		52426.8	0	0.40669	0	0.40669	17.1643
510.3	I71	2.25566e+06		51945.9	0	0.402959	0	0.402959	17.0069
517.4	I72	2.28046e+06		52517.1	0	0.407391	0	0.407391	17.1939
524.5	I73	2.27854e+06		52472.8	0	0.407047	0	0.407047	17.1794
531.6	I74	2.24573e+06		51717.2	0	0.401186	0	0.401186	16.932
538.733	I75	2.26738e+06		52215.7	0	0.405053	0	0.405053	17.0952
545.85	I76	2.25494e+06		51929.4	0	0.402831	0	0.402831	17.0015
552.95	I77	2.26022e+06		52051	0	0.403775	0	0.403775	17.0413
560.083	I78	2.28092e+06		52527.6	0	0.407472	0	0.407472	17.1973
567.2	I79	2.28805e+06		52691.8	0	0.408745	0	0.408745	17.2511
574.983	I80	2.26697e+06		52206.5	0	0.404981	0	0.404981	17.0922
582.117	I81	2.26007e+06		52047.5	0	0.403748	0	0.403748	17.0401
589.25	I82	2.24967e+06		51807.9	0	0.401889	0	0.401889	16.9617
596.35	I83	2.21943e+06		51111.5	0	0.396487	0	0.396487	16.7337
603.45	I84	2.24633e+06		51731.1	0	0.401294	0	0.401294	16.9366
610.583	I85	2.2411e+06		51610.5	0	0.400358	0	0.400358	16.8971
617.7	I86	2.2645e+06		52149.4	0	0.404538	0	0.404538	17.0735
624.817	I87	2.24701e+06		51746.7	0	0.401414	0	0.401414	16.9416
631.917	I88	2.23826e+06		51545.1	0	0.399851	0	0.399851	16.8757
639.033	I89	2.23467e+06		51462.4	0	0.399209	0	0.399209	16.8486
646.8	I90	2.22528e+06		51246.3	0	0.397532	0	0.397532	16.7778
653.933	I91	2.20526e+06		50785.1	0	0.393955	0	0.393955	16.6268
661.033	I92	2.24003e+06		51585.9	0	0.400167	0	0.400167	16.889
668.15	I93	2.20814e+06		50851.6	0	0.394471	0	0.394471	16.6486
675.25	I94	2.24144e+06		51618.4	0	0.400419	0	0.400419	16.8997
682.35	I95	2.2185e+06		51090.2	0	0.396322	0	0.396322	16.7267
689.45	I96	2.20441e+06		50765.7	0	0.393804	0	0.393804	16.6205
696.567	I97	2.20711e+06		50827.9	0	0.394287	0	0.394287	16.6408
703.683	I98	2.19262e+06		50494.1	0	0.391698	0	0.391698	16.5316
710.8	I99	2.1955e+06		50560.4	0	0.392212	0	0.392212	16.5533
718.583	I100	2.21315e+06		50966.9	0	0.395365	0	0.395365	16.6864
725.717	I101	2.19043e+06		50443.7	0	0.391307	0	0.391307	16.5151
732.817	I102	2.16992e+06		49971.3	0	0.387642	0	0.387642	16.3604
739.933	I103	2.16916e+06		49953.9	0	0.387507	0	0.387507	16.3547
747.033	I104	2.18007e+06		50205.1	0	0.389456	0	0.389456	16.437
754.15	I105	2.17976e+06		50197.9	0	0.3894	0	0.3894	16.4346
761.267	I106	2.12939e+06		49037.9	0	0.380402	0	0.380402	16.0548
768.383	I107	2.15526e+06		49633.8	0	0.385024	0	0.385024	16.2499
775.5	I108	2.16016e+06		49746.6	0	0.385899	0	0.385899	16.2868
782.633	I109	2.17116e+06		50000	0	0.387865	0	0.387865	16.3698
790.55	I110	2.1773e+06		50141.4	0	0.388962	0	0.388962	16.4161
797.667	I111	2.13993e+06		49280.8	0	0.382286	0	0.382286	16.1343
805.883	I112	2.12966e+06		49044.3	0	0.380451	0	0.380451	16.0569
812.983	I113	2.15916e+06		49723.7	0	0.385721	0	0.385721	16.2793
820.083	I114	2.14898e+06		49489.2	0	0.383902	0	0.383902	16.2026
827.2	I115	2.13194e+06		49096.6	0	0.380857	0	0.380857	16.074
834.317	I116	2.12886e+06		49025.7	0	0.380307	0	0.380307	16.0508
841.433	I117	2.1382e+06		49241	0	0.381977	0	0.381977	16.1213
848.567	I118	2.10984e+06		48587.9	0	0.376911	0	0.376911	15.9075
855.7	I119	2.12317e+06		48894.8	0	0.379292	0	0.379292	16.008
863.517	I120	2.11662e+06		48744	0	0.378121	0	0.378121	15.9586
870.633	I121	2.11181e+06		48633.1	0	0.377261	0	0.377261	15.9223
877.8	I122	2.08633e+06		48046.3	0	0.37271	0	0.37271	15.7302
884.917	I123	2.12239e+06		48876.9	0	0.379153	0	0.379153	16.0021
892.05	I124	2.10349e+06		48441.5	0	0.375775	0	0.375775	15.8595
899.167	I125	2.10511e+06		48478.8	0	0.376064	0	0.376064	15.8718
906.267	I126	2.09048e+06		48142	0	0.373452	0	0.373452	15.7615
913.4	I127	2.0826e+06		47960.5	0	0.372044	0	0.372044	15.7021
920.517	I128	2.09145e+06		48164.3	0	0.373625	0	0.373625	15.7688

## Sheet: Phosphorus
time [min]:	Peak name	internal standard #1	OPPh3	PPh3	A/B	V	Q	[PPh3]	[OPPh3]	[A/b]	[V]	[Q]	total phosphorus		when phosphorus source is PPH3
0.0166667	I0	1.29477e+08	713603	5.62917e+06	-174472	-31024.5	-97845.1	0.709778	0.052183	-0.00753975	-0.00229663	-0.00112479	0.741163
7.2	I1	1.27974e+08	709179	5.19876e+06	204804	-183234	-268227	0.663205	0.0524684	0.00895444	-0.0137234	-0.00311965	0.703015		INTERNAL REFERENCE (CF SPECTRUM)			FLOW CALIBRATION
14.3333	I2	1.31793e+08	1.03482e+06	6.90071e+06	590998	-261442	732906	0.854816	0.0743424	0.0250909	-0.0190135	0.00827718	0.94959		Triphenylphosphine mass (g)	0.0265			Triphenylphosphosphate	Peak 1	Peak 2	Peak 3
21.45	I3	1.32781e+08	868592	6.88818e+06	364783	-391394	830262	0.846913	0.0619362	0.0153716	-0.0282525	0.00930689	0.892394		Triphenylphosphine n (moles)	0.000101033		0 mL/min	7.57499e+07	7.89196e+06	2.93551e+06	6.45772e+06	3.99827e+06
28.6	I4	132786475	1.26388e+06	6.69443e+06	778002	144992	1.7319e+06	0.823057	0.090119	0.032783	0.0104657	0.019413	1.01909		Reaction Volume (L)	0.0224		4 mL/min	2.28924e+07	1.97289e+06	1.26534e+06	1.37486e+06	1.45817e+06
35.7	I5	1.33762e+08	499005	7142106	627397	373995	2.42187e+06	0.871695	0.0353213	0.0262441	0.0267986	0.026949	1.04005		Triphenylphosphine concentration (M)	0.00451041		CF	3.30895	4.0002	2.31993	2.74197	2.74197	4.69699
42.8333	I6	1.33651e+08	1.63755e+06	6447005	986300	-540782	3.59043e+06	0.787508	0.116007	0.0412912	-0.0387817	0.0399851	0.948519		Triphenylphosphine concentration (mM)	4.51041			internal standard			#	acyl cpmplex
49.9833	I7	1.34745e+08	846042	6.63383e+06	1.43366e+06	-284058	3.71808e+06	0.803752	0.0594488	0.0595328	-0.0202057	0.0410707	0.982926
57.0833	I8	1.35274e+08	2.31402e+06	6.74731e+06	702854	-530430	3.65956e+06	0.814305	0.161964	0.0290719	-0.0375831	0.0402661	0.999512
64.2167	I9	1.3513e+08	749409	6.79863e+06	1.54013e+06	-946910	4.53328e+06	0.821371	0.0525087	0.0637716	-0.0671637	0.0499328	0.917029		[Triphenylphosphate] ACTUAL EXPERIMENT
72.2333	I10	1.31627e+08	1.80553e+06	7.99712e+06	1937234	-1.4717e+06	5.4372e+06	0.991877	0.129874	0.0823489	-0.107164	0.0614829	1.1336		Triphenylphosphate mass (g)	0.0987	from this reaction
79.3667	I11	1.29736e+08	2765767	7.54625e+06	1.74925e+06	-153602	5.15258e+06	0.949601	0.201846	0.0754421	-0.0113478	0.0591138	1.33875		Triphenylphosphate n (moles)	0.000302501
86.5333	I12	1.29681e+08	951115	7.19177e+06	1.43793e+06	-199330	6.62984e+06	0.905378	0.0694418	0.0620418	-0.0147324	0.0760942	1.14553		Reaction Volume (L)	0.0224
93.65	I13	1.30632e+08	2.62889e+06	6.9493e+06	1.85113e+06	-391450	5.71912e+06	0.868484	0.19054	0.0792881	-0.0287213	0.0651635	1.22532		Triphenylphosphate concentration (M)	0.0135045
100.767	I14	1.30065e+08	2.06256e+06	8.8886e+06	837132	1.0238e+06	7.47651e+06	1.11569	0.150145	0.0360126	0.0754451	0.0855584	1.5743		Triphenylphosphate concentration (mM)	13.5045
107.883	I15	1.3006e+08	2.38246e+06	8.27597e+06	1.24308e+06	182389	7.79492e+06	1.03883	0.173439	0.0534784	0.0134411	0.0892059	1.43532
114.983	I16	1.3094e+08	1.96982e+06	8.39821e+06	3.01487e+06	-39894.1	8.44597e+06	1.04709	0.142435	0.12883	-0.00292021	0.0960069	1.53735
122.1	I17	1.31265e+08	2.21134e+06	8.77606e+06	2.53604e+06	-406626	8603208	1.09149	0.159503	0.1081	-0.0296908	0.0975516	1.50536
129.2	I18	1.31949e+08	2.87182e+06	9.13819e+06	2.21467e+06	-425534	9.58567e+06	1.13064	0.20607	0.0939125	-0.0309104	0.108129	1.57084
136.317	I19	1.32539e+08	2.27264e+06	9.30048e+06	3.53144e+06	-200270	9.17031e+06	1.1456	0.162349	0.149083	-0.0144827	0.102983	1.68013
144.1	I20	1.32933e+08	2.08727e+06	9.54817e+06	3.71402e+06	-387672	9.49514e+06	1.17262	0.148665	0.156326	-0.0279518	0.106315	1.68435
151.217	I21	1.34167e+08	2.705e+06	8.10465e+06	2.82078e+06	266764	1.04754e+07	0.986187	0.190891	0.117637	0.0190572	0.116212	1.56668		when phosphorus source is RhHCOPPh33
158.35	I22	1.35286e+08	2.66595e+06	8.99488e+06	2.74387e+06	536534	9.51638e+06	1.08546	0.186579	0.113483	0.0380121	0.104699	1.67972
165.483	I23	1.36433e+08	2.77095e+06	8.63949e+06	3.25498e+06	-190722	10712662	1.03381	0.192298	0.133491	-0.0133986	0.11687	1.58316		Rh concentration
172.6	I24	138554381	2.59404e+06	9.66648e+06	3.45856e+06	513782	1.02169e+07	1.13898	0.177264	0.139668	0.0355416	0.109754	1.77642		actual weight (g)	0.0133
179.717	I25	1.39421e+08	3.46804e+06	1.03853e+07	4.35884e+06	212282	1.09994e+07	1.21608	0.235516	0.17493	0.0145936	0.117427	1.94807		MW RhHCO(PPh3)3 (g/mol)	918.78
186.867	I26	1.39239e+08	3.05771e+06	8815080	4.28913e+06	-575856	1.15277e+07	1.03356	0.207921	0.172357	-0.0396397	0.123226	1.63014		MW Rh(acac)(CO)2 (g/mol)	258.03
193.983	I27	137523128	3.03538e+06	1.13952e+07	3.98048e+06	123426	1.15392e+07	1.35275	0.208978	0.16195	0.00860216	0.12489	2.02772		Number of mol (n)	5.15444e-05
201.1	I28	1.34596e+08	2.84265e+06	1.12226e+07	4.17614e+06	1.0903e+06	1.18343e+07	1.36123	0.199965	0.173606	0.0776413	0.130868	2.19455		actual volume of reaction (L)	0.0211
208.233	I29	1.33627e+08	2.23091e+06	1.03745e+07	5.51872e+06	36988.9	1.16612e+07	1.26748	0.158071	0.231082	0.0026531	0.129889	2.02291		[Rh] (M)	0.00244286
216	I30	1.31475e+08	2.96485e+06	1.02948e+07	4.8358e+06	-188382	1.17927e+07	1.27834	0.213513	0.205801	-0.0137333	0.133504	2.0095		[Rh] (mM)	2.44286		[PPh3]	7.32859
223.117	I31	1.31629e+08	4.32808e+06	1.11048e+07	4.99895e+06	1.17572e+06	1.14073e+07	1.3773	0.311321	0.212495	0.0856111	0.12899	2.41382
230.233	I32	133007329	2385225	1.1036e+07	4.67894e+06	-33000.8	1.1629e+07	1.35458	0.169792	0.196831	-0.00237808	0.130134	2.04342
237.35	I33	1.34216e+08	2.97436e+06	1.2481e+07	5.38938e+06	-62019.6	1.18409e+07	1.51814	0.209823	0.224675	-0.00442896	0.131312	2.29977
244.467	I34	1.3426e+08	3.87634e+06	1.03951e+07	5.49504e+06	1.00325e+06	1.17216e+07	1.26401	0.273362	0.229005	0.0716209	0.129946	2.26857
251.567	I35	1.34067e+08	3.51952e+06	1.1172e+07	6.05157e+06	623651	1.24548e+07	1.36044	0.248556	0.252561	0.0445858	0.138273	2.34156
258.65	I36	1.34113e+08	3.36147e+06	1.05344e+07	5.81061e+06	309840	1.29552e+07	1.28236	0.237314	0.242422	0.0221434	0.143779	2.19258
265.767	I37	1.35628e+08	3.77318e+06	1.08176e+07	6.82789e+06	805895	1.15738e+07	1.30213	0.263404	0.281682	0.0569517	0.127014	2.36982
272.9	I38	1.36788e+08	2.88405e+06	1.29683e+07	5.93473e+06	668825	1.14707e+07	1.54776	0.199627	0.242758	0.0468642	0.124815	2.45145
280	I39	1.3924e+08	3.56953e+06	1.02275e+07	7.50548e+06	1.62696e+06	1.17936e+07	1.19916	0.242723	0.301603	0.111993	0.126069	2.39514
287.783	I40	1.4048e+08	3.39675e+06	1.04575e+07	6.60608e+06	689753	1.17197e+07	1.2153	0.228936	0.263118	0.0470606	0.124173	2.18877
294.867	I41	1.42043e+08	3.38814e+06	1.04455e+07	7.13741e+06	885298	1.17699e+07	1.20055	0.225842	0.281152	0.0597374	0.123332	2.2315
301.967	I42	1.39686e+08	3.57085e+06	1.11165e+07	8.23395e+06	2.36765e+06	1.0494e+07	1.29922	0.242037	0.329819	0.162458	0.111818	2.63763
309.067	I43	1.37331e+08	3.15937e+06	1.06024e+07	8.87731e+06	1.38009e+06	1.15868e+07	1.26039	0.217819	0.361688	0.09632	0.125579	2.51981
316.133	I44	1.34809e+08	4.13284e+06	10556081	7.19121e+06	1.83719e+06	1.12033e+07	1.27836	0.290264	0.298472	0.130621	0.123695	2.5505
323.25	I45	1.33854e+08	4.01101e+06	1.09987e+07	8.13741e+06	1.67276e+06	1.05369e+07	1.34147	0.283718	0.340155	0.119779	0.117167	2.66222
330.333	I46	1.32695e+08	2.6165e+06	1.13447e+07	8.49231e+06	1.00446e+06	1.0884e+07	1.39575	0.186694	0.358089	0.0725528	0.122083	2.56581
337.433	I47	1.33138e+08	3.19747e+06	1.05969e+07	7.92679e+06	3.18746e+06	9.67625e+06	1.29941	0.227388	0.333132	0.229467	0.108176	2.76017
344.5	I48	133161986	4.33336e+06	1.13437e+07	9.81784e+06	2.82724e+06	9.37791e+06	1.39074	0.308112	0.412531	0.203498	0.104821	3.03573
351.617	I49	1.33398e+08	3.73476e+06	1.158e+07	10186651	3.21149e+06	9.10258e+06	1.41719	0.265081	0.427272	0.230747	0.101564	3.09987
359.383	I50	1.34764e+08	4.37258e+06	1.18669e+07	9.73578e+06	2.56475e+06	8.82824e+06	1.43757	0.307204	0.404219	0.182409	0.0975042	3.01554											6.51792
366.833	I51	1.34252e+08	4.5256e+06	1.15709e+07	9.98302e+06	3.97482e+06	9.44405e+06	1.40707	0.319168	0.416066	0.283775	0.104704	3.23062											7.45221
373.917	I52	1.35994e+08	4.08933e+06	1.22301e+07	1.09725e+07	3.4124e+06	8.1772e+06	1.46818	0.284706	0.451446	0.240502	0.0894973	3.22628											6.90797
381	I53	1.35322e+08	3.73721e+06	1.21307e+07	1.09588e+07	4.41884e+06	7.77475e+06	1.46349	0.261483	0.453125	0.312981	0.0855153	3.3427
388.1	I54	1.34651e+08	5.1536e+06	1.21198e+07	1.11531e+07	4.90138e+06	7.63548e+06	1.46945	0.362381	0.463454	0.348888	0.0844017	3.54092
395.183	I55	1.34575e+08	4.40237e+06	1.16038e+07	1.15462e+07	5.06922e+06	8.02182e+06	1.40768	0.309732	0.48006	0.361039	0.0887225	3.48833
402.333	I56	1.34925e+08	4.39058e+06	1.18529e+07	11398247	5.7722e+06	6.6813e+06	1.43418	0.308102	0.47268	0.410041	0.0737044	3.58143
409.433	I57	1.34969e+08	4.67019e+06	1.24276e+07	1.24439e+07	6.28788e+06	7.1882e+06	1.50323	0.327615	0.515873	0.446526	0.0792702	3.83491
416.533	I58	1.36543e+08	4.82933e+06	1.1892e+07	1.26833e+07	5.39699e+06	5.50702e+06	1.42187	0.334875	0.519739	0.378845	0.0600307	3.61394										Object	Integral [abs]	Integral [rel]
423.633	I59	1.37033e+08	4411729	1.21638e+07	12590188	7.44345e+06	4792440	1.44915	0.304822	0.514076	0.520626	0.0520541	3.87543										Integral 1	1.6066e+06	0.7651
431.383	I60	1.37803e+08	4.64662e+06	1.1935e+07	1.1798e+07	8.11467e+06	4924860	1.41395	0.319259	0.479038	0.564404	0.0531938	3.87329										Integral 2	1.63721e+06	0.7797
438.483	I61	1.37791e+08	5.64908e+06	1.24199e+07	1.32545e+07	7235422	4.52544e+06	1.47153	0.388169	0.538226	0.503294	0.0488839	3.99162										Integral 3	2.44396e+07	11.6394
445.567	I62	1.38959e+08	4.88351e+06	1.26112e+07	13705515	8.3354e+06	3.31757e+06	1.48163	0.332743	0.551862	0.574934	0.0355352	4.1035
452.667	I63	1.3898e+08	4.88007e+06	1.23791e+07	1.42117e+07	8.94367e+06	2.58364e+06	1.45414	0.332459	0.57216	0.616796	0.0276698	4.19218
459.75	I64	1.39408e+08	5.75386e+06	1.24198e+07	1.38205e+07	9.31703e+06	2.85584e+06	1.45444	0.390781	0.554698	0.640569	0.0304908	4.26625										Object	Integral [abs]	Integral [rel]
466.867	I65	1.38412e+08	5.12007e+06	1.26472e+07	13423337	9.47307e+06	2.27493e+06	1.49173	0.35024	0.542636	0.655986	0.0244636	4.26368										Integral 1	1.04717e+07	0.8794
473.967	I66	1.39745e+08	5.42587e+06	1.29937e+07	1.34303e+07	9.46994e+06	1760094	1.51797	0.367617	0.537737	0.649512	0.0187466	4.27883										Integral 2	1.22008e+07	1.0247
481.067	I67	1.38684e+08	5.86252e+06	1.3221e+07	1.29972e+07	1.00496e+07	1.39731e+06	1.55635	0.40024	0.524378	0.694543	0.0149965	4.40943										Integral 3	1.68828e+08	14.1785
488.183	I68	1.40148e+08	5.35039e+06	1.18253e+07	1.44478e+07	1.08093e+07	923117	1.37751	0.361461	0.576815	0.739241	0.00980378	4.38089
495.283	I69	1.39714e+08	6.20977e+06	1.23457e+07	13482269	1.02346e+07	1.73556e+06	1.4426	0.420822	0.539938	0.702114	0.0184895	4.36602
503.183	I70	1.41227e+08	5.07169e+06	1.31096e+07	1.43152e+07	1.09383e+07	1154296	1.51545	0.340016	0.567155	0.742355	0.0121653	4.48665
510.3	I71	1.41587e+08	6.10058e+06	1.38966e+07	1.41273e+07	1.08402e+07	551696	1.60235	0.407955	0.558285	0.733822	0.00579965	4.60031
517.417	I72	1.40196e+08	5.80831e+06	1.28501e+07	1.38611e+07	1.14739e+07	959493	1.49638	0.392263	0.553199	0.78443	0.0101866	4.57408
524.5	I73	1.4036e+08	5.995e+06	1.42387e+07	1.38835e+07	11655552	316264	1.65613	0.404398	0.553448	0.795915	0.00335375	4.76261
531.617	I74	1.40712e+08	5.21345e+06	1.26461e+07	14511860	1.16104e+07	822994	1.46722	0.350799	0.577051	0.790849	0.00870545	4.56252
538.733	I75	1.40616e+08	5.70939e+06	1.05792e+07	1.3105e+07	1.10223e+07	1.27466e+06	1.22826	0.384431	0.521462	0.7513	0.0134922	4.1717
545.85	I76	140882467	5.85438e+06	1.27014e+07	1.35215e+07	1.11903e+07	570751	1.47186	0.393448	0.53702	0.76131	0.00602996	4.46799
552.983	I77	140493493	5.50851e+06	1.22088e+07	1.38947e+07	1.13627e+07	195811	1.41868	0.371229	0.55337	0.775179	0.00207447	4.44909
560.1	I78	1.40496e+08	5.89501e+06	1.36378e+07	1.43956e+07	1.23514e+07	215993	1.58472	0.39727	0.573308	0.84262	0.00228824	4.81613
567.217	I79	1.40497e+08	6.33103e+06	1.19914e+07	1.3151e+07	1.1661e+07	493172	1.39339	0.42665	0.52374	0.795513	0.00522465	4.46377
575	I80	1.39452e+08	5.77734e+06	1.20165e+07	1.3476e+07	1.19338e+07	73952.6	1.40677	0.392253	0.540702	0.820223	0.00078932	4.52167
582.15	I81	140303128	5.73328e+06	1.32668e+07	1.39091e+07	1.09919e+07	680674	1.54372	0.386901	0.554692	0.7509	0.00722098	4.54903
589.25	I82	1.39586e+08	5.88655e+06	1.28416e+07	1.40153e+07	12135941	-25858.2	1.50191	0.399284	0.561797	0.833313	-0.000275728	4.69114
596.367	I83	1.38084e+08	6.60137e+06	1.36398e+07	1.41512e+07	1.06576e+07	506266	1.61263	0.452642	0.573419	0.739767	0.00545708	4.6971
603.467	I84	1.39161e+08	6.37255e+06	1.2547e+07	1.42763e+07	1.26906e+07	1.40978e+06	1.47195	0.433571	0.574012	0.874066	0.0150785	4.81675
610.6	I85	1.38768e+08	5.54324e+06	1.21896e+07	1.36734e+07	1.16309e+07	-324704	1.43407	0.378214	0.551324	0.803344	-0.00348276	4.51814
617.717	I86	1.39722e+08	5.13585e+06	1.31093e+07	12465802	1.18392e+07	-120104	1.53173	0.348025	0.499201	0.812147	-0.00127943	4.50118
624.833	I87	1.39666e+08	5.91781e+06	1.34774e+07	1.35421e+07	1.20812e+07	539431	1.57538	0.401176	0.542521	0.829083	0.00574871	4.72552
631.933	I88	1.4006e+08	6.39156e+06	1.36801e+07	14545967	1.09745e+07	481083	1.59457	0.432072	0.581098	0.751014	0.00511246	4.69598
639.05	I89	1.40408e+08	6.24486e+06	1.16491e+07	1.38177e+07	1.16035e+07	-146687	1.35448	0.421109	0.550638	0.792094	-0.00155498	4.45949
646.833	I90	1.40871e+08	5.95551e+06	1.3972e+07	1.48503e+07	1.19397e+07	-381316	1.61922	0.400277	0.589841	0.812363	-0.00402891	4.81988
653.95	I91	140840721	5.54786e+06	1.17184e+07	13648150	1.08867e+07	648065	1.35834	0.372959	0.542209	0.740877	0.00684881	4.30432
661.05	I92	141658447	5.6845e+06	1.22929e+07	1.38046e+07	1.23706e+07	16019.6	1.41672	0.379939	0.54526	0.837	0.00016832	4.56134
668.15	I93	1.4166e+08	5.76139e+06	1.28688e+07	1.4112e+07	1.15738e+07	-52993.5	1.48306	0.385072	0.557393	0.783077	-0.0005568	4.54852
675.25	I94	1.41243e+08	5.80644e+06	1.35323e+07	1.24928e+07	1.07667e+07	85876.2	1.56413	0.38923	0.494894	0.730624	0.000904962	4.40531
682.35	I95	1.41035e+08	5.83485e+06	1.20861e+07	1.47705e+07	1.29736e+07	135730	1.39904	0.391711	0.585988	0.881679	0.00143242	4.72751
689.467	I96	1.40806e+08	6.29846e+06	1.20385e+07	1.43405e+07	1.10365e+07	15713.7	1.3958	0.423524	0.569855	0.751258	0.000166105	4.46172
696.583	I97	1.40591e+08	6.94951e+06	1.2783e+07	1.46798e+07	1.19568e+07	155105	1.48438	0.468017	0.584233	0.815146	0.00164208	4.7528
703.7	I98	1.41689e+08	6.57747e+06	1.25469e+07	1.42673e+07	1.11751e+07	669786	1.44567	0.439527	0.563411	0.755948	0.00703597	4.53095
710.8	I99	1.41682e+08	5.20734e+06	1.24411e+07	13208719	1.19584e+07	428515	1.43355	0.347988	0.521635	0.808978	0.00450169	4.44727
718.617	I100	1.41573e+08	7.00312e+06	1.16074e+07	1.36351e+07	1.21199e+07	409566	1.33852	0.468354	0.538889	0.82053	0.00430594	4.53002
725.717	I101	1.41626e+08	5.20238e+06	1.21686e+07	1.39324e+07	1.20928e+07	-438510	1.40271	0.347795	0.550433	0.818395	-0.00460852	4.48356
732.833	I102	1.42591e+08	6.83617e+06	1.26545e+07	1.29218e+07	1.17907e+07	492432	1.44886	0.453926	0.507052	0.792552	0.0051402	4.50713
739.933	I103	1.41785e+08	6.21969e+06	1.28117e+07	1.25603e+07	1.24039e+07	123103	1.47519	0.415338	0.495666	0.838504	0.0012923	4.56016
747.05	I104	1.40765e+08	5.81342e+06	1.30435e+07	1.35796e+07	1.1959e+07	72213.5	1.51275	0.391021	0.539775	0.814286	0.000763568	4.61266
754.167	I105	1.41888e+08	6.39891e+06	1.2767e+07	1.35682e+07	1.21416e+07	-388674	1.46897	0.426996	0.535055	0.820177	-0.00407722	4.60235
761.283	I106	142086613	6.60056e+06	1.2096e+07	1.4123e+07	1.14715e+07	-395742	1.38982	0.439836	0.556155	0.773828	-0.00414556	4.48548
768.4	I107	1.42127e+08	6.04496e+06	1.28745e+07	1.3753e+07	1.16201e+07	255763	1.47885	0.4027	0.541432	0.783631	0.00267848	4.53436
775.517	I108	1.42789e+08	7.32196e+06	1.22992e+07	1.2741e+07	1.18122e+07	38542.6	1.40621	0.485508	0.499262	0.792889	0.000401764	4.47642
782.633	I109	1.42943e+08	5.06352e+06	1.18066e+07	1.32661e+07	11949873	-441061	1.34844	0.335393	0.51928	0.801269	-0.00459262	4.32034
790.567	I110	1.40989e+08	5.92202e+06	1.24702e+07	1.26573e+07	1.1207e+07	200568	1.44397	0.397693	0.502315	0.761872	0.0021174	4.37216
798.783	I111	1.40776e+08	6660922	1.28469e+07	1.2439e+07	1.21177e+07	800095	1.48985	0.447993	0.494402	0.825029	0.00845939	4.58516
805.9	I112	1.41515e+08	5.72322e+06	1.28743e+07	1.30901e+07	1.12867e+07	732631	1.48522	0.382915	0.517561	0.764436	0.00770563	4.43983
812.983	I113	1.40378e+08	5.8145e+06	1.20816e+07	1.28611e+07	1.16111e+07	113955	1.40506	0.392172	0.512625	0.79278	0.00120826	4.40925
820.083	I114	1.40799e+08	5.57629e+06	1.22928e+07	1.25935e+07	1.09161e+07	191239	1.42535	0.374982	0.50046	0.743096	0.00202164	4.28946
827.217	I115	1.40708e+08	6.58095e+06	1.27931e+07	1.2807e+07	1.11102e+07	-520453	1.48432	0.442827	0.509271	0.756801	-0.00550538	4.45378
834.333	I116	1.39712e+08	6.14063e+06	1.34029e+07	1.34581e+07	1.14078e+07	-35934.8	1.56616	0.416144	0.53898	0.782609	-0.00038283	4.6251
841.45	I117	1.42084e+08	6.50386e+06	1.16275e+07	1.37489e+07	1.24166e+07	511017	1.33601	0.433401	0.541433	0.837598	0.00535322	4.53283
848.583	I118	1.41005e+08	5.33033e+06	1.26002e+07	1.34169e+07	1.11667e+07	156807	1.45885	0.357917	0.532398	0.759046	0.00165521	4.40131
855.717	I119	1.40944e+08	5.97896e+06	1.20481e+07	1.26522e+07	1.22208e+07	252178	1.39553	0.401645	0.502274	0.831056	0.00266308	4.4665
863.533	I120	1.40343e+08	6.68402e+06	1.27814e+07	1.25293e+07	1.3249e+07	-444600	1.48682	0.450932	0.499524	0.904839	-0.00471524	4.74176
870.65	I121	1.41036e+08	5.03871e+06	12699116	1.41715e+07	1.16337e+07	-422555	1.46998	0.338261	0.56222	0.790615	-0.0044594	4.50945
877.817	I122	1.40254e+08	6.33069e+06	1.22495e+07	1.28199e+07	1.12855e+07	-240149	1.42585	0.427364	0.511433	0.771229	-0.00254853	4.41599
884.95	I123	1.40863e+08	6.19049e+06	1.238e+07	1.35773e+07	1.07849e+07	212976	1.43481	0.416094	0.539308	0.733829	0.00225039	4.39942
892.05	I124	1.41509e+08	6.91508e+06	1.19083e+07	1.39608e+07	1.11974e+07	525821	1.37384	0.462676	0.55201	0.75842	0.00553068	4.46291
899.167	I125	1.41382e+08	5.59253e+06	1.16989e+07	1.39511e+07	1.16279e+07	-482152	1.3509	0.374524	0.552126	0.788287	-0.00507594	4.40117
906.283	I126	1.41654e+08	5.37802e+06	1.18273e+07	1.25148e+07	1.08867e+07	511860	1.3631	0.359467	0.494329	0.736624	0.00537835	4.18985
913.417	I127	1.41006e+08	6.32923e+06	1.15619e+07	1.37397e+07	11717913	432463	1.33863	0.424987	0.545203	0.796506	0.00456494	4.4516
920.533	I128	1.42885e+08	5.9718e+06	1.22587e+07	1.30822e+07	1.15298e+07	-72036.8	1.40064	0.395714	0.512288	0.773412	-0.000750399	4.367
