# Supplementary material for: Mapping catalyst activation, turnover speciation and deactivation in Rh/PPh3-catalysed olefin hydroformylation
Source: Royal Society of Chemistry journal article supplement (doi:10.1039/d2cy00312k), 2022-01-01
Supplement: d2cy00312k9.xlsx [file d2cy00312k9.xlsx]

## Sheet: Proton
time [min]:	Peak name	1-hexene #1	1-heptanal #1	2-methylhexanal #1	Hydrogen #2	TMB aromatic #3	TMB methyl #9	1-hexene (other H double bond)	[1-hexene]	[1-heptanal]	[2-methylhexanal]	[Hydorgen]	[TMB aromatic]	[TMB methyl]	[1-hexene (other H double bond)]	Conversion	Regioselectivity n-heptanal	Regioselectivity 2-methylhexanal	L:B ratio
0.0166667	I0	5.11637e+07	13130.5	1907.5	75263	53411620	205597919	1.15205e+08	535.852	0.163301	0.0218904	0.0829306	117.985	94.0688	550.267	0	88.1796	11.8204	7.45992		INTERNAL REFERENCE			FLOW CALIBRATION
7.2	I1	4.75003e+07	23955.8	-5098.5	90551	5.26454e+07	2.06453e+08	1.08286e+08	495.424	0.296697	-0.0582678	0.0993627	115.81	94.0688	515.079	7.54467	124.438	-24.4382	-5.09196		1-hexene Volume (mL)	1.3			1-hexene (initial)	1-hexene (end)	1-heptanal (end)	2-methylhexanal (end)	Hydrogen (end)	TMB aromatic (initial)	TMB methyl (initial)	TMB aromatic (end)	TMB methyl (end)	1-hexene (other H double bond)
14.3333	I2	4.6243e+07	38321	5173.75	6.97713e+06	5.20088e+07	2.04699e+08	1.05752e+08	486.444	0.478682	0.0596346	7.7217	115.391	94.0688	507.334	9.22049	88.922	11.078	8.02692		1-hexene n (moles)	0.0104729		0 mL/min	29142933	4176547	20157390	6.62235e+06	1074285	2.00388e+07	62136918	20500117	6.30756e+07	6.17893e+06
21.45	I3	4.61357e+07	58732.8	16508.2	8.56943e+06	5.21163e+07	205030326	105766569	484.53	0.732467	0.189973	9.4686	115.442	94.0688	506.585	9.57766	79.4054	20.5946	3.85564		Reaction Volume (L)	0.0224		4 mL/min	6.75363e+06	987741	4.8867e+06	1.7202e+06	1.58738e+06	7.57361e+06	3.6012e+07	8.49335e+06	3.78577e+07	1.62179e+06
28.5833	I4	46234552	104316	40814.8	8.88732e+06	52105729	204906393	105872487	485.862	1.30174	0.46997	9.82578	115.489	94.0688	507.399	9.32907	73.4736	26.5264	2.76983		1-hexene (M)	0.467541		CF	4.31515	4.22838	4.12495	3.84975	0.676765	2.64587	1.72545	2.41367	1.66612	3.80995
35.7167	I5	45534374	184119	67208.5	8.71442e+06	5.1729e+07	2.03966e+08	1.04464e+08	480.711	2.30817	0.777454	9.67905	115.182	94.0688	502.959	10.2904	74.804	25.196	2.96888		1-hexene(mM)	467.541
42.85	I6	4.54788e+07	280228	98102.5	8568089	5.18917e+07	2.049e+08	1.04296e+08	477.935	3.497	1.12966	9.47314	115.018	94.0688	499.86	10.8085	75.5837	24.4163	3.09563
50	I7	45546498	383532	144883	8.53324e+06	51904295	2.0471e+08	1.04532e+08	479.091	4.79058	1.66989	9.44338	115.153	94.0688	501.456	10.5927	74.1522	25.8478	2.86881		# is the number of protons of the peak taken for integration			0 mL	static with long delay (flow+ full relaxtion effects)
57.1333	I8	4.5061e+07	507332	185702	8.41771e+06	5.18139e+07	2.04871e+08	1.03421e+08	473.611	6.33194	2.13867	9.30817	114.861	94.0688	495.735	11.6154	74.7519	25.2481	2.96069		If #>1 the integration will be divided by the number of protons			4 mL	flow with shot delay (flow + poor relaxiation)
64.25	I9	45034870	656470	242613	8.28329e+06	5.19699e+07	2.05248e+08	103240270	472.468	8.17827	2.78897	9.14273	114.996	94.0688	493.961	11.8287	74.57	25.43	2.93236
72.3	I10	4.7235e+07	909722	323387	7561652	5.22449e+07	2.04114e+08	1.06744e+08	498.302	11.3962	3.73816	8.39258	116.246	94.0688	513.561	7.00757	75.3002	24.6998	3.04862						initial CF were calculated under Argon ( the reactor was still no pressurized)
79.4	I11	4.38762e+07	1.01319e+06	373813	8201392	5.15429e+07	2.04691e+08	100620601	461.565	12.6566	4.30887	9.07697	114.361	94.0688	482.737	13.8634	74.6021	25.3979	2.93733		INTERNAL REFERENCE STANDARD				final CF were calculated under 10 bar H2/CO ( reactor pressurized)
86.5167	I12	4.36153e+07	1230884	451196	8.01667e+06	5.16331e+07	2.04879e+08	1.00062e+08	458.399	15.3619	5.19608	8.86439	114.456	94.0688	479.615	14.4542	74.7248	25.2752	2.95645		Mass of TMB (g)	0.3544
93.6	I13	43333013	1.44485e+06	519977	7833201	5.1501e+07	2.04603e+08	9.94183e+07	456.046	18.0566	5.99625	8.67319	114.317	94.0688	477.173	14.8934	75.0705	24.9295	3.01131		Molecular weight of TMB (g/mol)	168.19
100.7	I14	4.33503e+07	1.6999e+06	604916	7.72336e+06	5.17117e+07	205020405	99376398	455.3	21.2008	6.96156	8.53416	114.552	94.0688	476.002	15.0327	75.2806	24.7194	3.04541		Moles of TMB (n)	0.00210714
107.783	I15	4.28153e+07	1.93401e+06	697362	7.69225e+06	51581880	2.04996e+08	9.81986e+07	449.734	24.1234	8.0264	8.50079	114.277	94.0688	470.415	16.0713	75.0343	24.9657	3.0055		Reaction Volume (L)	0.0224
114.867	I16	4.23773e+07	2.22116e+06	788622	7.51717e+06	51703331	2.05494e+08	9.72769e+07	444.055	27.6381	9.05479	8.2872	114.269	94.0688	464.872	17.1312	75.3227	24.6773	3.05231		TMB (M)	0.0940688
121.967	I17	41893353	2473724	882872	7.41579e+06	5.15715e+07	204860440	9.61633e+07	440.341	30.8758	10.1683	8.20071	114.33	94.0688	460.971	17.8242	75.226	24.774	3.03648		TMB (mM)	94.0688		FLOW CALIBRATION
129.05	I18	4.16438e+07	2.76599e+06	999635	7501204	5.14759e+07	2.04298e+08	9.55735e+07	438.923	34.6189	11.5448	8.318	114.432	94.0688	459.405	18.0888	74.9916	25.0084	2.99866						1-hexene (initial)	1-hexene (end)	1-heptanal (end)	2-methylhexanal (end)	Hydrogen (end)	TMB aromatic (initial)	TMB methyl (initial)	TMB aromatic (end)	TMB methyl (end)	1-hexene (other H double bond)
136.133	I19	4.13879e+07	3.10713e+06	1107138	7.21089e+06	51753882	2.05214e+08	9.49644e+07	434.28	38.7149	12.7293	7.96039	114.537	94.0688	454.441	18.9553	75.2561	24.7439	3.04141					0 mL/min	2.78016e+07	7.53593e+06	1.87317e+07	5722346	4.41821e+06	2.16925e+07	6.43757e+07	2.16584e+07	6.12478e+07	1.44223e+07
143.933	I20	4.398e+07	3.70993e+06	1.29925e+06	7.16677e+06	5.27819e+07	2.05884e+08	9.95122e+07	459.975	46.0754	14.8894	7.88592	116.432	94.0688	474.653	14.1601	75.577	24.423	3.0945					4 mL/min	6.11977e+06	1757276	3.67838e+06	1.21779e+06	3.89945e+06	7.34342e+06	3.6664e+07	7.98182e+06	3.63252e+07	3.68713e+06
151.017	I21	4.04232e+07	3803107	1.34464e+06	7.14785e+06	51689317	205236686	9.27688e+07	424.109	47.3815	15.4582	7.88991	114.381	94.0688	443.884	20.8534	75.4006	24.5994	3.06514					CF	4.54292	4.28842	5.09238	4.69897	1.13304	2.954	1.75583	2.71347	1.6861	3.91153
158.083	I22	3.97272e+07	4128722	1.46625e+06	7.09901e+06	5.15972e+07	2.04983e+08	9.12729e+07	417.323	51.5019	16.8771	7.8457	114.319	94.0688	437.267	22.1197	75.3183	24.6817	3.05158
165.167	I23	39484015	4.48819e+06	1.59221e+06	7.06762e+06	5.16004e+07	2.04619e+08	9.0687e+07	415.507	56.0856	18.3596	7.82491	114.529	94.0688	435.233	22.4588	75.3381	24.6619	3.05484
172.25	I24	3.88402e+07	4.87187e+06	1.70431e+06	6.79218e+06	5.15929e+07	2.05134e+08	8.92579e+07	407.706	60.7274	19.6029	7.50108	114.225	94.0688	427.299	23.9146	75.5972	24.4028	3.09788
179.35	I25	3.85703e+07	5255684	1844738	6.77989e+06	51665495	2.04976e+08	8.86219e+07	405.185	65.5621	21.2344	7.49328	114.474	94.0688	424.581	24.385	75.5354	24.4646	3.08754
186.417	I26	3.79615e+07	5629431	1.9821e+06	6.78094e+06	5.17263e+07	2.05298e+08	8.72368e+07	398.163	70.1142	22.7798	7.48268	114.429	94.0688	417.29	25.6954	75.4776	24.5224	3.07791
193.533	I27	38072359	6.16705e+06	2.14814e+06	6.57719e+06	5.22245e+07	2.06103e+08	8.7244e+07	397.767	76.5102	24.5916	7.2295	115.08	94.0688	415.694	25.7694	75.6764	24.3236	3.11124
200.633	I28	3.72571e+07	6.49783e+06	2.27037e+06	6.53621e+06	5.18527e+07	2.05508e+08	85570193	390.375	80.8471	26.0661	7.20524	114.591	94.0688	408.898	27.1487	75.6194	24.3806	3.10162
207.717	I29	3.67635e+07	6.9338e+06	2.44987e+06	6586691	5.21213e+07	2.06222e+08	84523135	383.87	85.973	28.0296	7.23576	114.786	94.0688	402.497	28.3627	75.4132	24.5868	3.06722
215.533	I30	3.87197e+07	7914892	2.75118e+06	6.3975e+06	5.29912e+07	2.06357e+08	8.77913e+07	404.031	98.0733	31.4562	7.02332	116.625	94.0688	417.786	24.6004	75.715	24.285	3.11777
222.617	I31	35746932	7908727	2737440	6.15915e+06	5.21142e+07	205896423	8.20202e+07	373.845	98.2163	31.3692	6.77678	114.952	94.0688	391.196	30.2335	75.7926	24.2074	3.13097
229.717	I32	3.51052e+07	8.3218e+06	2.89101e+06	6.12112e+06	5.20081e+07	2.05653e+08	8.07104e+07	367.568	103.468	33.1682	6.74291	114.854	94.0688	385.404	31.405	75.7252	24.2748	3.1195
236.833	I33	3.44968e+07	8.7694e+06	3038476	6.03544e+06	5.1872e+07	205353128	7.91372e+07	361.726	109.193	34.911	6.65824	114.72	94.0688	378.444	32.4953	75.7737	24.2263	3.12775
243.917	I34	3.37706e+07	9.22788e+06	3202640	5989054	5.19497e+07	2.05816e+08	7.76738e+07	353.314	114.643	36.7144	6.5922	114.634	94.0688	370.61	34.0651	75.7432	24.2568	3.12256
251	I35	33239554	9.69123e+06	3.35341e+06	5793510	5.17853e+07	2.05229e+08	7.61431e+07	348.754	120.744	38.5529	6.39523	114.598	94.0688	364.347	34.916	75.7981	24.2019	3.13192
258.083	I36	3.2753e+07	10195297	3496725	5654079	5.18131e+07	2.04836e+08	7.5071e+07	344.307	127.268	40.2775	6.25326	114.879	94.0688	359.905	35.7459	75.9602	24.0398	3.15977
265.183	I37	31934748	1.059e+07	3706668	5.85484e+06	51696016	204728311	7.34419e+07	335.883	132.264	42.7183	6.47872	114.68	94.0688	352.28	37.3181	75.5871	24.4129	3.0962
272.267	I38	3.14246e+07	1.11035e+07	3.843e+06	5.69913e+06	5.17711e+07	2.05025e+08	7.21749e+07	330.039	138.478	44.2254	6.29729	114.681	94.0688	345.702	38.4086	75.7939	24.2061	3.13118

## Sheet: Hydride
time [min]:	Peak name	A/B	C	Riv 1	Riv 2	[A/B]	[C]	Sum Hyds	%			1	2													time [min]:	Peak name	1
0.0166667	I0	4144.84		99.9975	0	0.000805632	0	0.000805632	0.0337401	RG Calibration				Flow Calibration												0.0166667	I0	4144.84
7.11667	I1	-15402.7		-371.601	0	-0.00299382	0	-0.00299382	-0.125382		Hyd 1	Hyd 2			Hyd1	Hyd 2	1-hexene									7.11667	I1	-15402.7
14.25	I2	4441.18		107.147	0	0.000863232	0	0.000863232	0.0361524	CF	0.9894	0.9894		0 mL/min	2.04628e+06	1	29142933									14.25	I2	4441.18
21.3667	I3	127701		3080.88	0	0.0248212	0	0.0248212	1.03952	RG Hyd	203	203		4 mL/min	933902	1	6.75363e+06									21.3667	I3	127701
28.4833	I4	103758		2503.24	0	0.0201674	0	0.0201674	0.844616	RG 1H	4.5	9		CF	1.1	1	4.31515									28.4833	I4	103758
35.6333	I5	180175		4346.86	0	0.0350206	0	0.0350206	1.46667	Int TMB	105084876	65984307														35.6333	I5	180175
42.7667	I6	201674		4865.55	0	0.0391994	0	0.0391994	1.64168	[TMB]	94.0688	467.541														42.7667	I6	201674
49.9	I7	211892		5112.06		0.0411854		0.0411854	1.72486						1.0898e+06											49.9	I7	211892
57.0333	I8	259111		6251.25		0.0503633		0.0503633	2.10923	IRF	45.5944	22.7972			893931											57.0333	I8	259111
64.15	I9	306597		7396.88		0.0595931		0.0595931	2.49577						1.21911											64.15	I9	306597
72.2167	I10	260562		6286.27		0.0506455		0.0506455	2.12105																	72.2167	I10	260562
79.3167	I11	299837		7233.8		0.0582793		0.0582793	2.44075																	79.3167	I11	299837
86.4167	I12	309700		7471.74		0.0601963		0.0601963	2.52104																	86.4167	I12	309700
93.5	I13	355902		8586.42		0.0691767		0.0691767	2.89714																	93.5	I13	355902
100.583	I14	346610		8362.23		0.0673705		0.0673705	2.82149																	100.583	I14	346610
107.683	I15	291231		7026.18		0.0566066		0.0566066	2.3707																	107.683	I15	291231
114.783	I16	462929		11168.5		0.0899794		0.0899794	3.76836																	114.783	I16	462929
121.867	I17	341007		8227.05		0.0662814		0.0662814	2.77588																	121.867	I17	341007
128.95	I18	358546		8650.2		0.0696905		0.0696905	2.91866																	128.95	I18	358546
136.017	I19	397646		9593.52		0.0772904		0.0772904	3.23694																	136.017	I19	397646
143.833	I20	480750		11598.4		0.0934432		0.0934432	3.91343																	143.833	I20	480750
150.9	I21	456450		11012.2		0.0887201		0.0887201	3.71562																	150.9	I21	456450
157.983	I22	514258		12406.9		0.0999563		0.0999563	4.1862																	157.983	I22	514258
165.083	I23	476366		11492.7		0.0925911		0.0925911	3.87774																	165.083	I23	476366
172.15	I24	481626		11619.6		0.0936136		0.0936136	3.92056																	172.15	I24	481626
179.233	I25	487238		11755		0.0947043		0.0947043	3.96624																	179.233	I25	487238
186.333	I26	547983		13220.5		0.106511		0.106511	4.46072																	186.333	I26	547983
193.433	I27	513366		12385.3		0.0997829		0.0997829	4.17893																	193.433	I27	513366
200.533	I28	543480		13111.9		0.105636		0.105636	4.42407																	200.533	I28	543480
207.617	I29	598235		14432.9		0.116279		0.116279	4.86978																	207.617	I29	598235
215.433	I30	513930		12399		0.0998925		0.0998925	4.18352																	215.433	I30	513930
222.517	I31	607350		14652.8		0.118051		0.118051	4.94399																	222.517	I31	607350
229.617	I32	609073		14694.4		0.118385		0.118385	4.95801																	229.617	I32	609073
236.733	I33	661062		15948.6		0.12849		0.12849	5.38121																	236.733	I33	661062
243.817	I34	657790		15869.7		0.127855		0.127855	5.35458																	243.817	I34	657790
250.9	I35	634833		15315.8		0.123392		0.123392	5.1677																	250.9	I35	634833
257.983	I36	703220		16965.7		0.136685		0.136685	5.72439																	257.983	I36	703220
265.083	I37	703273		16967		0.136695		0.136695	5.72482																	265.083	I37	703273
												Rh concentration
												actual weight (g)	0.013
												MW RhHCO(PPh3)3 (g/mol)	918.78
												MW Rh(acac)(CO)2 (g/mol)	258.03
												Number of mol (n)	5.03817e-05
												actual volume of reaction (L)	0.0211
												[Rh] (M)	0.00238776
												[Rh] (mM)	2.38776
												0

## Sheet: Phosphorus
time [min]:	Peak name	internal standard #1	OPPh3	PPh3	A/B	Q	[OPPh3]	[PPh3]	[A/B]	Q	total phosphorus		when phosphorus source is PPH3
0.0166667	I0	1.04722e+08	76970.7	3.77305e+06	-559823	-982554	1.00017	0.0109191	-0.0195618	-0.0710344	0.97197
7.15	I1	1.04637e+08	1.25456e+06	3.83902e+06	-153831	-1.01169e+06	1.01848	0.178115	-0.00537963	-0.0731999	1.18584		INTERNAL REFERENCE (CF SPECTRUM)			FLOW CALIBRATION
14.2333	I2	1.0587e+08	1.22781e+06	4.60838e+06	-12246.5	-618056	1.20836	0.172288	-0.000423287	-0.044198	1.3798		Triphenylphosphine mass (g)	0.0264			Triphenylphosphosphate	Peak 1	Peak 2	Peak 3
21.3833	I3	1.05269e+08	1.41132e+06	3.90256e+06	1.3438e+06	1.06284e+06	1.02913	0.199169	0.0467122	0.0764388	1.32172		Triphenylphosphine n (moles)	0.000100652		0 mL/min	4.8929e+07	5638050	4.51446e+06	4.47085e+06
28.5167	I4	1.05877e+08	1.39079e+06	4.02306e+06	107721	1.58231e+06	1.05481	0.195144	0.003723	0.113146	1.2574		Reaction Volume (L)	0.0224		4 mL/min	1.40621e+07	1.54333e+06	766896	2.31499e+06
35.65	I5	1.06647e+08	883230	4.19413e+06	542619	2.42693e+06	1.09172	0.123033	0.0186183	0.172289	1.25199		Triphenylphosphine concentration (M)	0.00449339		CF	4.5	11	5.88667	2.9	3
42.7833	I6	1.05779e+08	1.31295e+06	3.77681e+06	921175	3.14726e+06	0.991167	0.184394	0.0318669	0.225259	1.2393		Triphenylphosphine concentration (mM)	4.49339			internal standard			#	acyl cpmplex
49.95	I7	1.06128e+08	1.65394e+06	3.93245e+06	1.29445e+06	2.97178e+06	1.02861	0.231519	0.0446325	0.211999	1.3494
57.05	I8	1.05909e+08	1.12328e+06	4.74243e+06	1108235	3.77007e+06	1.24304	0.157562	0.0382906	0.269503	1.47719
64.15	I9	1.05632e+08	2.12652e+06	3.99917e+06	1.17868e+06	4.45198e+06	1.05098	0.299069	0.0408315	0.319085	1.43171		[Triphenylphosphate] ACTUAL EXPERIMENT
72.2333	I10	1.05043e+08	2.05727e+06	4.34466e+06	2.00993e+06	5.39892e+06	1.14817	0.290951	0.0700179	0.389124	1.57916		Triphenylphosphate mass (g)	0.083	from this reaction
79.3333	I11	1.0502e+08	1.60121e+06	4.8013e+06	209691	5.72046e+06	1.26913	0.226502	0.00730638	0.412388	1.51024		Triphenylphosphate n (moles)	0.000254383
86.4333	I12	1.0444e+08	2.09289e+06	4.51285e+06	1.79321e+06	4.9964e+06	1.19951	0.297697	0.0628289	0.362191	1.62286		Reaction Volume (L)	0.0224
93.5	I13	1.04721e+08	1.69433e+06	4.68037e+06	1.90479e+06	5.1487e+06	1.24069	0.240359	0.066559	0.372229	1.61417		Triphenylphosphate concentration (M)	0.0113564
100.6	I14	1.051e+08	1.51134e+06	6.46194e+06	1.5365e+06	5.56e+06	1.70678	0.213625	0.0534961	0.400515	2.0274		Triphenylphosphate concentration (mM)	11.3564
107.683	I15	1.0491e+08	2.53143e+06	6.08191e+06	1.65382e+06	6.59053e+06	1.60933	0.358466	0.0576858	0.475613	2.08316
114.783	I16	1.06151e+08	2.20593e+06	4.70602e+06	1.59548e+06	7.01889e+06	1.23069	0.308718	0.0549999	0.500601	1.64941
121.867	I17	1.05614e+08	1.7501e+06	5.7366e+06	1.80482e+06	8.14649e+06	1.50783	0.246171	0.0625324	0.583978	1.87906
128.95	I18	1.05619e+08	2.20037e+06	4.99438e+06	2.19004e+06	7.9878e+06	1.31268	0.309494	0.0758763	0.572579	1.77393
136.017	I19	1.06088e+08	2.53053e+06	6.77262e+06	1.68346e+06	7.67444e+06	1.7722	0.354358	0.0580673	0.547684	2.24269
143.833	I20	1.05943e+08	1.64312e+06	6.4625e+06	2.48499e+06	9235047	1.69336	0.230407	0.0858318	0.659958	2.09543
150.9	I21	1.0558e+08	2.3834e+06	5.97595e+06	2.68347e+06	9.07437e+06	1.57125	0.335361	0.0930057	0.650703	2.09262		when phosphorus source is RhHCOPPh33
157.983	I22	1.04747e+08	2.31468e+06	6.97009e+06	1.78809e+06	8.92018e+06	1.84722	0.328283	0.0624662	0.644736	2.30044
165.083	I23	1.05954e+08	2.50502e+06	7.2493e+06	1.91534e+06	9.77724e+06	1.89932	0.35123	0.0661491	0.69863	2.38285		Rh concentration
172.167	I24	1.05263e+08	2.37576e+06	7.2727e+06	3041632	9.49611e+06	1.91795	0.335291	0.105736	0.682994	2.46472		actual weight (g)	0.0133
179.25	I25	1.04989e+08	2.52032e+06	7.06144e+06	2.32138e+06	1.05185e+07	1.86711	0.356623	0.0809092	0.758504	2.38555		MW RhHCO(PPh3)3 (g/mol)	918.78
186.333	I26	1.06066e+08	2.25213e+06	7.28377e+06	3.64941e+06	1.02642e+07	1.90633	0.315438	0.125904	0.732653	2.47358		MW Rh(acac)(CO)2 (g/mol)	258.03
193.45	I27	1.05246e+08	1.87409e+06	7.59552e+06	2.33324e+06	9.99914e+06	2.00343	0.264535	0.0811242	0.719296	2.43021		Number of mol (n)	5.15444e-05
200.533	I28	1.05791e+08	2.46197e+06	8.50109e+06	2.38671e+06	1.12789e+07	2.23072	0.345725	0.0825554	0.807168	2.74155		actual volume of reaction (L)	0.0211
207.617	I29	1.05452e+08	1.83632e+06	8.79677e+06	2.19698e+06	1.07562e+07	2.31573	0.258696	0.0762371	0.772243	2.7269		[Rh] (M)	0.00244286
215.433	I30	1.04986e+08	3.12816e+06	8.05618e+06	2.67689e+06	1.04701e+07	2.13019	0.442644	0.0933027	0.755034	2.75944		[Rh] (mM)	2.44286		[PPh3]	7.32859
222.533	I31	1.05118e+08	3.14037e+06	8.85049e+06	3.13393e+06	1.03292e+07	2.33728	0.443814	0.109096	0.743941	2.99928
229.65	I32	1.0505e+08	3.21929e+06	8.31645e+06	2.64485e+06	1.10304e+07	2.19767	0.455262	0.0921298	0.794961	2.83719
236.75	I33	1.04794e+08	2246406	9.81227e+06	3.23177e+06	1.164e+07	2.59929	0.318456	0.11285	0.840945	3.14344
243.817	I34	1.05813e+08	3.27861e+06	9.88439e+06	3.20221e+06	1.1573e+07	2.59317	0.460306	0.11074	0.828045	3.27495
250.9	I35	1.06029e+08	3.16739e+06	9.47283e+06	3.07442e+06	1.21331e+07	2.48014	0.443787	0.106105	0.86636	3.13614
258	I36	1.05369e+08	2.76656e+06	9.1449e+06	3.64018e+06	1.16867e+07	2.40926	0.390052	0.126417	0.839701	3.05215
265.083	I37	1.05581e+08	2.36589e+06	9.39255e+06	4.02206e+06	1.12905e+07	2.46956	0.332894	0.139399	0.809609	3.08125
																						6.51792
																						7.45221
																						6.90797
																					Object	Integral [abs]	Integral [rel]
																					Integral 1	1.6066e+06	0.7651
																					Integral 2	1.63721e+06	0.7797
																					Integral 3	2.44396e+07	11.6394
																					Object	Integral [abs]	Integral [rel]
																					Integral 1	1.04717e+07	0.8794
																					Integral 2	1.22008e+07	1.0247
																					Integral 3	1.68828e+08	14.1785
