# Supplementary material for: Mapping catalyst activation, turnover speciation and deactivation in Rh/PPh3-catalysed olefin hydroformylation
Source: Royal Society of Chemistry journal article supplement (doi:10.1039/d2cy00312k), 2022-01-01
Supplement: d2cy00312k10.xlsx [file d2cy00312k10.xlsx]

## Sheet: Proton
time [min]:	Peak name	1-hexene #1	1-heptanal #1	2-methylhexanal #1	Hydrogen #2	TMB aromatic #3	TMB methyl #9	1-hexene (other H double bond)	[1-hexene]	[1-heptanal]	[2-methylhexanal]	[Hydrogen]	[TMB aromatic]	[TMB methyl]	[1-hexene (other H double bond)]	Conversion	Regioselectivity n-heptanal	Regioselectivity 2-methylhexanal	L/B
0.0166667	I0	2.58984e+06	27.4219	873.938	-512.703		1.21756e+07		436.955	0.00549395	0.161566	-0.0091008	0	89.7423	0	0	3.28861	96.7114	0.0340043		INTERNAL REFERENCE			FLOW CALIBRATION
6.56667	I1	2.46136e+06	355.859	-1796.29	-1403.86		1.20872e+07		418.314	0.0718174	-0.334511	-0.0251016	0	89.7423	0	4.26618	-27.3389	127.339	-0.214694		1-hexene Volume (mL)	1.3			1-hexene (initial)	1-hexene (end)	1-heptanal (end)	2-methylhexanal (end)	Hydrogen (end)	TMB aromatic (initial)	TMB methyl (initial)	TMB aromatic (end)	TMB methyl (end)	1-hexene (other H double bond)
13.55	I2	2.39402e+06	294.719	-649.391	448281		1.1989e+07		410.201	0.0599654	-0.121922	8.08108	0	89.7423	0	6.12273	-96.7864	196.786	-0.491835		1-hexene n (moles)	0.0104729		0 mL/min	29142933	4176547	20157390	6.62235e+06	1074285	2.00388e+07	62136918	20500117	6.30756e+07	6.17893e+06
20	I3	2.30394e+06	6355.12	828.641	592667		1.20024e+07		394.327	1.29161	0.155402	10.672	0	89.7423	0	9.75573	89.2605	10.7395	8.31142		Reaction Volume (L)	0.0224		4 mL/min	6.75363e+06	987741	4.8867e+06	1.7202e+06	1.58738e+06	7.57361e+06	3.6012e+07	8.49335e+06	3.78577e+07	1.62179e+06
26.4667	I4	2.33781e+06	19455.4	6717.33	575417		1.2072e+07		397.817	3.93131	1.2525	10.3016	0	89.7423	0	8.95688	75.8383	24.1617	3.13878		1-hexene (M)	0.467541		CF	4.31515	4.22838	4.12495	3.84975	0.676765	2.64587	1.72545	2.41367	1.66612	3.80995
32.95	I5	2.16592e+06	40540.2	9927.23	564576		1.19845e+07		371.257	8.25167	1.86452	10.1813	0	89.7423	0	15.0354	81.569	18.431	4.42563		1-hexene(mM)	467.541
39.4	I6	2.25861e+06	66906.7	22034.7	556169		1.21049e+07		383.295	13.483	4.09737	9.92999	0	89.7423	0	12.2805	76.6935	23.3065	3.29064
45.8667	I7	2.29123e+06	91756.1	30832.3	553262		1.2215e+07		385.328	18.324	5.68163	9.78908	0	89.7423	0	11.8152	76.3321	23.6679	3.22513		# is the number of protons of the peak taken for integration			0 mL	static with long delay (flow+ full relaxtion effects)
52.3333	I8	2.25217e+06	122470	38966.4	545038		1.22436e+07		377.872	24.4003	7.16374	9.62098	0	89.7423	0	13.5216	77.3041	22.6959	3.40608		If #>1 the integration will be divided by the number of protons			4 mL	flow with shot delay (flow + poor relaxiation)
58.7833	I9	2.24243e+06	157046	53021.7	538925		1.22358e+07		376.48	31.3093	9.75398	9.5192	0	89.7423	0	13.8401	76.2464	23.7536	3.2099
66.7333	I10	3.22418e+06	274179	89198.6	536936		1.23685e+07		535.493	54.0745	16.233	9.38225	0	89.7423	0	-22.5511	76.9114	23.0886	3.33115						initial CF were calculated under Argon ( the reactor was still no pressurized)
73.1833	I11	2.16924e+06	227757	78290.8	530496		1.23315e+07		361.365	45.0541	14.2908	9.29758	0	89.7423	0	17.2993	75.9191	24.0809	3.15268		INTERNAL REFERENCE STANDARD				final CF were calculated under 10 bar H2/CO ( reactor pressurized)
79.6333	I12	2.1191e+06	261031	88363.9	533874		1.23661e+07		352.024	51.4915	16.0843	9.33059	0	89.7423	0	19.437	76.1982	23.8018	3.20136		Mass of TMB (g)	0.3381
86.0833	I13	2.07343e+06	284027	95074.4	520823		1.23929e+07		343.692	55.9067	17.2683	9.08282	0	89.7423	0	21.3439	76.4013	23.5987	3.23753		Molecular weight of TMB (g/mol)	168.19
92.55	I14	2.19144e+06	332502	107918	521346		1.24344e+07		362.044	65.2302	19.5358	9.06162	0	89.7423	0	17.1439	76.9532	23.0468	3.339		Moles of TMB (n)	0.00201023
99	I15	2.09051e+06	357618	112930	521794		1.24365e+07		345.307	70.1451	20.4395	9.06783	0	89.7423	0	20.9741	77.436	22.564	3.43185		Reaction Volume (L)	0.0224
105.45	I16	1.98415e+06	376486	121124	515940		1.2403e+07		328.625	74.0455	21.9818	8.99032	0	89.7423	0	24.7921	77.1088	22.8912	3.36848		TMB (M)	0.0897423
111.917	I17	1.93751e+06	403674	138031	515355		1.24657e+07		319.286	78.9935	24.9241	8.93497	0	89.7423	0	26.9292	76.0155	23.9845	3.16937		TMB (mM)	89.7423		FLOW CALIBRATION
118.35	I18	1.88844e+06	433398	138455	509168		1.24531e+07		311.516	84.8963	25.026	8.83667	0	89.7423	0	28.7075	77.233	22.767	3.39232						1-hexene (initial)	1-hexene (end)	1-heptanal (end)	2-methylhexanal (end)	Hydrogen (end)	TMB aromatic (initial)	TMB methyl (initial)	TMB aromatic (end)	TMB methyl (end)	1-hexene (other H double bond)
124.817	I19	1.89445e+06	467194	146322	496726		1.24205e+07		313.325	91.7558	26.5173	8.6433	0	89.7423	0	28.2935	77.5796	22.4204	3.46022					0 mL/min	2.78016e+07	7.53593e+06	1.87317e+07	5722346	4.41821e+06	2.16925e+07	6.43757e+07	2.16584e+07	6.12478e+07	1.44223e+07
132.067	I20	2.70914e+06	708994	222978	503548		1.25302e+07		444.149	138.027	40.0558	8.68535	0	89.7423	0	-1.64653	77.5072	22.4928	3.44586					4 mL/min	6.11977e+06	1757276	3.67838e+06	1.21779e+06	3.89945e+06	7.34342e+06	3.6664e+07	7.98182e+06	3.63252e+07	3.68713e+06
138.517	I21	1.89156e+06	546172	174788	500200		1.25328e+07		310.044	106.306	31.3921	8.62576	0	89.7423	0	29.0444	77.2022	22.7978	3.38638					CF	4.54292	4.28842	5.09238	4.69897	1.13304	2.954	1.75583	2.71347	1.6861	3.91153
144.983	I22	1.78649e+06	546533	177037	492070		1.24434e+07		294.926	107.14	32.0246	8.54652	0	89.7423	0	32.5043	76.988	23.012	3.34556
151.417	I23	1.72174e+06	563055	190294	494451		1.24515e+07		284.053	110.308	34.4004	8.5823	0	89.7423	0	34.9926	76.2277	23.7723	3.20658
157.883	I24	1.74502e+06	603235	200259	491613		1.25055e+07		286.652	117.67	36.0456	8.49625	0	89.7423	0	34.3977	76.5504	23.4496	3.26446
164.35	I25	1.79454e+06	660967	216289	486887		1.25427e+07		293.911	128.548	38.8152	8.38957	0	89.7423	0	32.7365	76.8078	23.1922	3.31179
170.8	I26	1.68923e+06	651327	214139	477845		1.24318e+07		279.132	127.803	38.7723	8.30722	0	89.7423	0	36.1189	76.7239	23.2761	3.29625
177.25	I27	1.65421e+06	675699	221019	477048		1.2436e+07		273.252	132.541	40.0045	8.2906	0	89.7423	0	37.4644	76.8151	23.1849	3.31316
183.717	I28	1.64274e+06	710912	227594	474486		1.25209e+07		269.517	138.502	40.9153	8.19013	0	89.7423	0	38.3192	77.1955	22.8045	3.3851
190.167	I29	1.57217e+06	710413	233615	467249		1.24498e+07		259.413	139.196	42.2376	8.11128	0	89.7423	0	40.6317	76.72	23.28	3.29554
197.367	I30	2.28114e+06	1.07196e+06	339195	473110		1.25909e+07		372.176	207.681	60.6389	8.12098	0	89.7423	0	14.8251	77.4005	22.5995	3.42488
203.817	I31	1.53016e+06	770306	245704	465989		1.2477e+07		251.93	150.601	44.3262	8.07174	0	89.7423	0	42.3442	77.2602	22.7398	3.39757
210.267	I32	1.46854e+06	774269	253623	462695		1.24629e+07		242.058	151.548	45.8067	8.02377	0	89.7423	0	44.6033	76.7896	23.2104	3.30842
216.7	I33	1.4429e+06	798623	259085	461766		1.24578e+07		237.93	156.378	46.8123	8.01094	0	89.7423	0	45.5482	76.9614	23.0386	3.34054
223.15	I34	1.51807e+06	879874	286726	459599		1.24917e+07		249.645	171.821	51.6659	7.95169	0	89.7423	0	42.8671	76.8819	23.1181	3.32561
229.6	I35	1.44087e+06	876609	281672	456664		1.24664e+07		237.431	171.531	50.8584	7.91699	0	89.7423	0	45.6623	77.1309	22.8691	3.37272
236.05	I36	1.39838e+06	903903	297076	451117		1.24951e+07		229.899	176.465	53.5163	7.80281	0	89.7423	0	47.386	76.7301	23.2699	3.2974
242.5	I37	1.343e+06	900682	286091	445031		1.24789e+07		221.081	176.064	51.6043	7.70755	0	89.7423	0	49.4042	77.3336	22.6664	3.41181
248.95	I38	1.39601e+06	962247	319539	448899		1.25139e+07		229.166	187.574	57.4768	7.75284	0	89.7423	0	47.5538	76.5449	23.4551	3.26347
255.4	I39	1.30413e+06	952162	310142	438933		1.24739e+07		214.77	186.203	55.9653	7.60502	0	89.7423	0	50.8484	76.8899	23.1101	3.32712
262.55	I40	1.89339e+06	1.40597e+06	447246	436839		1.26424e+07		307.654	271.283	79.6297	7.46782	0	89.7423	0	29.5912	77.3079	22.6921	3.40681
269	I41	1.31933e+06	1.03933e+06	336544	436614		1.25294e+07		216.31	202.349	60.4606	7.53132	0	89.7423	0	50.4961	76.9946	23.0054	3.3468
275.433	I42	1.23482e+06	1.01642e+06	330642	436183		1.24918e+07		203.063	198.483	59.5787	7.5465	0	89.7423	0	53.5277	76.9131	23.0869	3.33145
281.883	I43	1.22962e+06	1.03732e+06	342225	431646		1.25385e+07		201.455	201.81	61.4364	7.44021	0	89.7423	0	53.8956	76.6621	23.3379	3.28487
									#DIV/0!	#DIV/0!	#DIV/0!	#DIV/0!	#DIV/0!	#DIV/0!	#DIV/0!	#DIV/0!	#DIV/0!	#DIV/0!	#DIV/0!
									#DIV/0!	#DIV/0!	#DIV/0!	#DIV/0!	#DIV/0!	#DIV/0!	#DIV/0!	#DIV/0!	#DIV/0!	#DIV/0!	#DIV/0!
									#DIV/0!	#DIV/0!	#DIV/0!	#DIV/0!	#DIV/0!	#DIV/0!	#DIV/0!	#DIV/0!	#DIV/0!	#DIV/0!	#DIV/0!
									#DIV/0!	#DIV/0!	#DIV/0!	#DIV/0!	#DIV/0!	#DIV/0!	#DIV/0!	#DIV/0!	#DIV/0!	#DIV/0!	#DIV/0!
									#DIV/0!	#DIV/0!	#DIV/0!	#DIV/0!	#DIV/0!	#DIV/0!	#DIV/0!	#DIV/0!	#DIV/0!	#DIV/0!	#DIV/0!
									#DIV/0!	#DIV/0!	#DIV/0!	#DIV/0!	#DIV/0!	#DIV/0!	#DIV/0!	#DIV/0!	#DIV/0!	#DIV/0!	#DIV/0!
									#DIV/0!	#DIV/0!	#DIV/0!	#DIV/0!	#DIV/0!	#DIV/0!	#DIV/0!	#DIV/0!	#DIV/0!	#DIV/0!	#DIV/0!
									#DIV/0!	#DIV/0!	#DIV/0!	#DIV/0!	#DIV/0!	#DIV/0!	#DIV/0!	#DIV/0!	#DIV/0!	#DIV/0!	#DIV/0!
									#DIV/0!	#DIV/0!	#DIV/0!	#DIV/0!	#DIV/0!	#DIV/0!	#DIV/0!	#DIV/0!	#DIV/0!	#DIV/0!	#DIV/0!
									#DIV/0!	#DIV/0!	#DIV/0!	#DIV/0!	#DIV/0!	#DIV/0!	#DIV/0!	#DIV/0!	#DIV/0!	#DIV/0!	#DIV/0!
									#DIV/0!	#DIV/0!	#DIV/0!	#DIV/0!	#DIV/0!	#DIV/0!	#DIV/0!	#DIV/0!	#DIV/0!	#DIV/0!	#DIV/0!
									#DIV/0!	#DIV/0!	#DIV/0!	#DIV/0!	#DIV/0!	#DIV/0!	#DIV/0!	#DIV/0!	#DIV/0!	#DIV/0!	#DIV/0!
									#DIV/0!	#DIV/0!	#DIV/0!	#DIV/0!	#DIV/0!	#DIV/0!	#DIV/0!	#DIV/0!	#DIV/0!	#DIV/0!	#DIV/0!
									#DIV/0!	#DIV/0!	#DIV/0!	#DIV/0!	#DIV/0!	#DIV/0!	#DIV/0!	#DIV/0!	#DIV/0!	#DIV/0!	#DIV/0!
									#DIV/0!	#DIV/0!	#DIV/0!	#DIV/0!	#DIV/0!	#DIV/0!	#DIV/0!	#DIV/0!	#DIV/0!	#DIV/0!	#DIV/0!
									#DIV/0!	#DIV/0!	#DIV/0!	#DIV/0!	#DIV/0!	#DIV/0!	#DIV/0!	#DIV/0!	#DIV/0!	#DIV/0!	#DIV/0!
									#DIV/0!	#DIV/0!	#DIV/0!	#DIV/0!	#DIV/0!	#DIV/0!	#DIV/0!	#DIV/0!	#DIV/0!	#DIV/0!	#DIV/0!
									#DIV/0!	#DIV/0!	#DIV/0!	#DIV/0!	#DIV/0!	#DIV/0!	#DIV/0!	#DIV/0!	#DIV/0!	#DIV/0!	#DIV/0!
									#DIV/0!	#DIV/0!	#DIV/0!	#DIV/0!	#DIV/0!	#DIV/0!	#DIV/0!	#DIV/0!	#DIV/0!	#DIV/0!	#DIV/0!
									#DIV/0!	#DIV/0!	#DIV/0!	#DIV/0!	#DIV/0!	#DIV/0!	#DIV/0!	#DIV/0!	#DIV/0!	#DIV/0!	#DIV/0!
									#DIV/0!	#DIV/0!	#DIV/0!	#DIV/0!	#DIV/0!	#DIV/0!	#DIV/0!	#DIV/0!	#DIV/0!	#DIV/0!	#DIV/0!
									#DIV/0!	#DIV/0!	#DIV/0!	#DIV/0!	#DIV/0!	#DIV/0!	#DIV/0!	#DIV/0!	#DIV/0!	#DIV/0!	#DIV/0!
									#DIV/0!	#DIV/0!	#DIV/0!	#DIV/0!	#DIV/0!	#DIV/0!	#DIV/0!	#DIV/0!	#DIV/0!	#DIV/0!	#DIV/0!
									#DIV/0!	#DIV/0!	#DIV/0!	#DIV/0!	#DIV/0!	#DIV/0!	#DIV/0!	#DIV/0!	#DIV/0!	#DIV/0!	#DIV/0!
									#DIV/0!	#DIV/0!	#DIV/0!	#DIV/0!	#DIV/0!	#DIV/0!	#DIV/0!	#DIV/0!	#DIV/0!	#DIV/0!	#DIV/0!
									#DIV/0!	#DIV/0!	#DIV/0!	#DIV/0!	#DIV/0!	#DIV/0!	#DIV/0!	#DIV/0!	#DIV/0!	#DIV/0!	#DIV/0!
									#DIV/0!	#DIV/0!	#DIV/0!	#DIV/0!	#DIV/0!	#DIV/0!	#DIV/0!	#DIV/0!	#DIV/0!	#DIV/0!	#DIV/0!
									#DIV/0!	#DIV/0!	#DIV/0!	#DIV/0!	#DIV/0!	#DIV/0!	#DIV/0!	#DIV/0!	#DIV/0!	#DIV/0!	#DIV/0!
									#DIV/0!	#DIV/0!	#DIV/0!	#DIV/0!	#DIV/0!	#DIV/0!	#DIV/0!	#DIV/0!	#DIV/0!	#DIV/0!	#DIV/0!
									#DIV/0!	#DIV/0!	#DIV/0!	#DIV/0!	#DIV/0!	#DIV/0!	#DIV/0!	#DIV/0!	#DIV/0!	#DIV/0!	#DIV/0!
									#DIV/0!	#DIV/0!	#DIV/0!	#DIV/0!	#DIV/0!	#DIV/0!	#DIV/0!	#DIV/0!	#DIV/0!	#DIV/0!	#DIV/0!
									#DIV/0!	#DIV/0!	#DIV/0!	#DIV/0!	#DIV/0!	#DIV/0!	#DIV/0!	#DIV/0!	#DIV/0!	#DIV/0!	#DIV/0!
									#DIV/0!	#DIV/0!	#DIV/0!	#DIV/0!	#DIV/0!	#DIV/0!	#DIV/0!	#DIV/0!	#DIV/0!	#DIV/0!	#DIV/0!
									#DIV/0!	#DIV/0!	#DIV/0!	#DIV/0!	#DIV/0!	#DIV/0!	#DIV/0!	#DIV/0!	#DIV/0!	#DIV/0!	#DIV/0!
									#DIV/0!	#DIV/0!	#DIV/0!	#DIV/0!	#DIV/0!	#DIV/0!	#DIV/0!	#DIV/0!	#DIV/0!	#DIV/0!	#DIV/0!
									#DIV/0!	#DIV/0!	#DIV/0!	#DIV/0!	#DIV/0!	#DIV/0!	#DIV/0!	#DIV/0!	#DIV/0!	#DIV/0!	#DIV/0!
									#DIV/0!	#DIV/0!	#DIV/0!	#DIV/0!	#DIV/0!	#DIV/0!	#DIV/0!	#DIV/0!	#DIV/0!	#DIV/0!	#DIV/0!
									#DIV/0!	#DIV/0!	#DIV/0!	#DIV/0!	#DIV/0!	#DIV/0!	#DIV/0!	#DIV/0!	#DIV/0!	#DIV/0!	#DIV/0!
									#DIV/0!	#DIV/0!	#DIV/0!	#DIV/0!	#DIV/0!	#DIV/0!	#DIV/0!	#DIV/0!	#DIV/0!	#DIV/0!	#DIV/0!
									#DIV/0!	#DIV/0!	#DIV/0!	#DIV/0!	#DIV/0!	#DIV/0!	#DIV/0!	#DIV/0!	#DIV/0!	#DIV/0!	#DIV/0!
									#DIV/0!	#DIV/0!	#DIV/0!	#DIV/0!	#DIV/0!	#DIV/0!	#DIV/0!	#DIV/0!	#DIV/0!	#DIV/0!	#DIV/0!
									#DIV/0!	#DIV/0!	#DIV/0!	#DIV/0!	#DIV/0!	#DIV/0!	#DIV/0!	#DIV/0!	#DIV/0!	#DIV/0!	#DIV/0!
									#DIV/0!	#DIV/0!	#DIV/0!	#DIV/0!	#DIV/0!	#DIV/0!	#DIV/0!	#DIV/0!	#DIV/0!	#DIV/0!	#DIV/0!

## Sheet: Hydride
time [min]:	Peak name	A/B	C	Riv 1	Riv 2	[A/B]	[C]	Sum Hyds	%			1	2
0.0166667	I0	-8529.52	11219	-198.666	492.121	-0.00165203	0.00409229	0.00244026	0.102206	RG Calibration				Flow Calibration
7	I1	-3963.78	-8623.36	-92.3227	-378.264	-0.000767721	-0.0031455	-0.00391323	-0.163898		Hyd 1	Hyd 2			Hyd1	Hyd 2	1-hexene
13.45	I2	1.07729e+06	52248.9	25091.8	2291.9	0.208654	0.0190586	0.227713	9.53732	CF	0.9894	0.9894		0 mL/min	4.78213e+06	1	29142933
19.9167	I3	3.39527e+06	77592.5	79081.2	3403.6	0.65761	0.0283031	0.685913	28.7282	RG Hyd	203	203		4 mL/min	4.5031e+06	1	6.75363e+06
26.4167	I4	5.34125e+06	135893	124406	5960.95	1.03451	0.0495691	1.08408	45.4048	RG 1H	4.5	9		CF	1.06196	1	4.31515
32.85	I5	6.65233e+06	178018	154943	7808.78	1.28845	0.0649349	1.35338	56.684	Int TMB	97127922	65984307
39.3167	I6	7.67349e+06	223424	178727	9800.51	1.48623	0.0814975	1.56773	65.6614	[TMB]	89.7423	467.541
45.7667	I7	8.38682e+06	227485	195342	9978.63	1.62439	0.0829787	1.70737	71.51
52.2333	I8	8.77895e+06	280552	204475	12306.4	1.70034	0.102336	1.80268	75.5018	IRF	45.5944	22.7972
58.7	I9	8.84958e+06	250729	206120	10998.2	1.71402	0.0914573	1.80548	75.6191
66.6333	I10	8.8968e+06	273409	207220	11993.1	1.72317	0.0997301	1.8229	76.3486
73.0833	I11	8.94453e+06	269989	208332	11843.1	1.73241	0.0984828	1.8309	76.6836
79.5333	I12	9.00928e+06	275577	209840	12088.2	1.74495	0.100521	1.84547	77.2943
85.9833	I13	8.96899e+06	272832	208902	11967.8	1.73715	0.0995199	1.83667	76.9255
92.45	I14	9.01674e+06	289143	210014	12683.3	1.7464	0.105469	1.85187	77.562
98.9	I15	9.0877e+06	287191	211667	12597.6	1.76014	0.104757	1.8649	78.1078
105.367	I16	9.07793e+06	275728	211439	12094.8	1.75825	0.100576	1.85883	77.8534
111.8	I17	9.13583e+06	295325	212788	12954.4	1.76946	0.107724	1.87719	78.6225
118.267	I18	9.11907e+06	293004	212397	12852.6	1.76622	0.106878	1.8731	78.4511
124.75	I19	9.13583e+06	266255	212788	11679.3	1.76946	0.0971205	1.86658	78.1784
131.967	I20	9.14012e+06	281951	212887	12367.8	1.77029	0.102846	1.87314	78.453
138.433	I21	9.16539e+06	268704	213476	11786.7	1.77519	0.0980141	1.8732	78.4556
144.867	I22	9.19957e+06	296769	214272	13017.8	1.78181	0.108251	1.89006	79.1616
151.333	I23	9.16933e+06	307677	213568	13496.3	1.77595	0.11223	1.88818	79.083
157.783	I24	9.1877e+06	325885	213996	14295	1.77951	0.118872	1.89838	79.5102
164.233	I25	9.18364e+06	296663	213901	13013.1	1.77872	0.108212	1.88694	79.0308
170.7	I26	9.1941e+06	241229	214145	10581.5	1.78075	0.0879922	1.86874	78.2687
177.167	I27	9.25582e+06	301287	215582	13216	1.7927	0.109899	1.9026	79.687
183.633	I28	9.22992e+06	355339	214979	15587	1.78769	0.129615	1.9173	80.3026
190.05	I29	9.22965e+06	293720	214973	12884	1.78764	0.107139	1.89477	79.3591
197.25	I30	9.23658e+06	332076	215134	14566.5	1.78898	0.12113	1.91011	80.0013
203.733	I31	9.31296e+06	354649	216913	15556.7	1.80377	0.129364	1.93313	80.9657
210.15	I32	9.2484e+06	327381	215410	14360.6	1.79127	0.119417	1.91069	80.0255
216.6	I33	9.27266e+06	278155	215975	12201.3	1.79597	0.101461	1.89743	79.4702
223.033	I34	9.30056e+06	301286	216624	13215.9	1.80137	0.109899	1.91127	80.0499
229.5	I35	9.30635e+06	320556	216759	14061.2	1.80249	0.116928	1.91942	80.3913
235.933	I36	9.31939e+06	345797	217063	15168.4	1.80502	0.126135	1.93115	80.8826
242.4	I37	9.37901e+06	320703	218452	14067.6	1.81656	0.116981	1.93354	80.9829
248.833	I38	9.31544e+06	327848	216971	14381.1	1.80425	0.119588	1.92384	80.5764
255.283	I39	9.33885e+06	338723	217516	14858.1	1.80879	0.123555	1.93234	80.9325
262.433	I40	9.34911e+06	355478	217755	15593	1.81077	0.129666	1.94044	81.2716
268.883	I41	9.3876e+06	332769	218652	14596.9	1.81823	0.121382	1.93961	81.237			Rh concentration
275.317	I42	9.36133e+06	316810	218040	13896.9	1.81314	0.115561	1.9287	80.7801			actual weight (g)	0.0138
281.767	I43	9.39122e+06	352162	218736	15447.6	1.81893	0.128457	1.94738	81.5626			MW RhHCO(PPh3)3 (g/mol)	918.78
					0		0					MW Rh(acac)(CO)2 (g/mol)	258.03
				0	0	0	0	0	0			Number of mol (n)	5.34822e-05
				0	0	0	0	0	0			actual volume of reaction (L)	0.0224
				0	0	0	0	0	0			[Rh] (M)	0.0023876
				0	0	0	0	0	0			[Rh] (mM)	2.3876
												0

## Sheet: Phosphorus
time [min]:	Peak name	internal standard #1	OPPh3	PPh3	A/B	C	[PPh3]	[OPPh3]	[A/B]	[C]	total phosphorus		when phosphorus source is PPH3
0.0166667	I0	1.45379e+08	683262	1.30623e+08	-53254.6	184405	32.5421	0.0828932	-0.0016288	0.00528107	32.6218
7	I1	1.43257e+08	500303	1.29716e+08	212483	-344196	32.7947	0.0615954	0.00659504	-0.0100032	32.8695		INTERNAL REFERENCE (CF SPECTRUM)			FLOW CALIBRATION
13.45	I2	1.42928e+08	2.06395e+06	1.29464e+08	1.17866e+07	-273245	32.8066	0.254692	0.366678	-0.00795951	33.7947		Triphenylphosphine mass (g)	0.2626			Triphenylphosphosphate	TPP	TPPO	A/B
19.9	I3	1.43942e+08	2.3667e+06	1.35978e+08	2.55959e+07	709109	34.2142	0.289992	0.790662	0.0205104	36.0855		Triphenylphosphine n (moles)	0.00100118		0 mL/min	6.91362e+07	1.81492e+08	3.0732e+06	1.31526e+07
26.3833	I4	1.44198e+08	2500474	1.39731e+08	3.43608e+07	1.39799e+06	35.0961	0.30584	1.05953	0.0403639	37.521		Reaction Volume (L)	0.0224		4 mL/min	1.41255e+07	1.56474e+07	544089	4.61831e+06
32.85	I5	1.45517e+08	2.21295e+06	1.43352e+08	4.10017e+07	2.2509e+06	35.6794	0.268219	1.25285	0.0644009	38.4533		Triphenylphosphine concentration (M)	0.0446956		CF	4.89445	11.5989	5.64834	2.84793	4
39.3167	I6	1.4589e+08	3.45266e+06	1.47008e+08	4.59168e+07	1.71263e+06	36.4958	0.417406	1.39944	0.0488749	39.7121		Triphenylphosphine concentration (mM)	44.6956			internal standard				acyl cpmplex
45.7833	I7	1.46549e+08	3.57001e+06	1.48586e+08	5.00501e+07	2.35272e+06	36.7215	0.429653	1.51856	0.0668399	40.1883
52.2333	I8	1.46546e+08	2.58058e+06	1.42799e+08	5.02406e+07	1.40784e+06	35.292	0.310581	1.52437	0.0399971	38.6514
59.1333	I9	1.37787e+08	4.08357e+06	1.33089e+08	4.85225e+07	1.81362e+06	34.9831	0.522712	1.56582	0.0548006	38.6375		[Triphenylphosphate] ACTUAL EXPERIMENT
66.6333	I10	1.38831e+08	2952971	1.30651e+08	4.88866e+07	1.50437e+06	34.0842	0.375149	1.56571	0.0451147	37.5908		Triphenylphosphate mass (g)	0.1117
73.0833	I11	1.39264e+08	3.8345e+06	1.33505e+08	5.02801e+07	1.35346e+06	34.7205	0.485626	1.60534	0.0404629	38.4168		Triphenylphosphate n (moles)	0.000342344
79.5333	I12	1.40256e+08	3.46282e+06	1.31456e+08	5.03279e+07	2.37239e+06	33.9456	0.43545	1.5955	0.0704227	37.5721		Reaction Volume (L)	0.0224
85.9833	I13	1.3901e+08	3.40269e+06	1.32772e+08	4.95884e+07	1.30658e+06	34.593	0.431727	1.58615	0.0391328	38.197		Triphenylphosphate concentration (M)	0.0152832
92.4333	I14	1.39555e+08	3.49933e+06	1.341e+08	4.99834e+07	1.26585e+06	34.8025	0.442254	1.59254	0.0377647	38.4298		Triphenylphosphate concentration (mM)	15.2832
98.9	I15	1.39412e+08	3.87638e+06	1.31481e+08	4.92698e+07	2.08689e+06	34.1579	0.490408	1.57141	0.0623232	37.7911
105.367	I16	1.3961e+08	3.58517e+06	134481576	5.01942e+07	2.58061e+06	34.8878	0.452923	1.59863	0.0769583	38.538
111.8	I17	140385712	3.37645e+06	1.33532e+08	4.9019e+07	2.39701e+06	34.4502	0.424198	1.55257	0.071088	37.9795
118.267	I18	1.41042e+08	3.2298e+06	1.34575e+08	5.01623e+07	1.77335e+06	34.5575	0.403887	1.58139	0.0523475	38.1242
124.75	I19	1.4063e+08	3.43279e+06	1.34203e+08	5.01446e+07	1.35444e+06	34.5629	0.430527	1.58546	0.0400989	38.1644
131.95	I20	1.40959e+08	3.80003e+06	1.34669e+08	5.04062e+07	1.39943e+06	34.6021	0.475471	1.59001	0.0413338	38.2576
138.433	I21	1.41012e+08	4.06057e+06	1.35248e+08	5.07955e+07	2.60981e+06	34.7377	0.507881	1.60169	0.077055	38.4489		when phosphorus source is RhHCOPPh33
144.867	I22	1.41517e+08	3.22249e+06	1.33753e+08	5.09935e+07	2.06661e+06	34.2314	0.401621	1.6022	0.0607997	37.8374
151.333	I23	1.42046e+08	3.84485e+06	1.32017e+08	5.12189e+07	2.23667e+06	33.6613	0.477401	1.60329	0.0655577	37.3453		Rh concentration
157.783	I24	1.41256e+08	4.07117e+06	134138441	5.18312e+07	2013258	34.3933	0.508328	1.63153	0.0593393	38.1647		actual weight (g)	0.0138
164.25	I25	1.41707e+08	4.09753e+06	1.33896e+08	5.10517e+07	2.43308e+06	34.2219	0.509991	1.60188	0.0714851	37.9356		MW RhHCO(PPh3)3 (g/mol)	918.78
170.7	I26	1.41965e+08	3.74404e+06	1.34068e+08	5.14633e+07	2.89421e+06	34.2036	0.465147	1.61185	0.0848786	37.8925		MW Rh(acac)(CO)2 (g/mol)	258.03
177.167	I27	1.41936e+08	3.66971e+06	1.36044e+08	5.09548e+07	2.34421e+06	34.7148	0.456007	1.59626	0.068763	38.3634		Number of mol (n)	5.34822e-05
183.617	I28	1.40749e+08	4.03511e+06	1.3718e+08	5.12989e+07	2.22899e+06	35.2997	0.50564	1.62059	0.0659346	39.0466		actual volume of reaction (L)	0.0224
190.05	I29	1.41513e+08	4.32396e+06	1.31668e+08	5.06454e+07	2865556	33.6986	0.538911	1.59131	0.0843069	37.4201		[Rh] (M)	0.0023876
197.267	I30	1.41628e+08	4131114	1.34109e+08	5.0599e+07	2.27067e+06	34.2955	0.514459	1.58856	0.0667507	37.987		[Rh] (mM)	2.3876		[PPh3]	7.16279
203.717	I31	1.42655e+08	4.42401e+06	1.34323e+08	5.17576e+07	1.36736e+06	34.1028	0.546966	1.61323	0.0399066	37.8762
210.15	I32	141155715	4.02383e+06	1.34091e+08	5.16744e+07	2.07148e+06	34.4055	0.502774	1.62775	0.0610987	38.1637
216.583	I33	1.42324e+08	4.66979e+06	1.34037e+08	5.14752e+07	1.73274e+06	34.1094	0.578696	1.60816	0.050688	37.9044
223.05	I34	1.4202e+08	4.55531e+06	1.34522e+08	5.08728e+07	2.68392e+06	34.3062	0.56572	1.59275	0.0786813	38.0574
229.483	I35	1.42117e+08	4.14722e+06	1.36614e+08	5.14946e+07	2.5784e+06	34.8157	0.514686	1.61111	0.075536	38.5526
235.95	I36	1.41891e+08	3.67512e+06	1.3484e+08	5.28986e+07	2.14192e+06	34.4184	0.456822	1.65767	0.0628487	38.1906
242.383	I37	1.42552e+08	4.89979e+06	1.36131e+08	5.15918e+07	1.56381e+06	34.587	0.606228	1.60923	0.0456731	38.4117
248.85	I38	1.42527e+08	5.10004e+06	1.33249e+08	5.0319e+07	2.62783e+06	33.8606	0.631114	1.5698	0.0767627	37.6313
255.283	I39	1.4186e+08	4.36387e+06	1.35358e+08	5.20969e+07	2.91402e+06	34.5581	0.542555	1.63291	0.0855227	38.3665
262.433	I40	1.42246e+08	4.7009e+06	1.36033e+08	5.26557e+07	2.79191e+06	34.6362	0.582871	1.64595	0.0817169	38.511
268.883	I41	1.41711e+08	4.69693e+06	1.34273e+08	5.23807e+07	2.72654e+06	34.3172	0.584579	1.64353	0.0801049	38.1889
275.333	I42	1.4281e+08	4.56683e+06	1.35891e+08	5.08385e+07	3.39968e+06	34.4633	0.56401	1.58286	0.0991125	38.193
281.767	I43	1.42013e+08	4.73119e+06	1.35807e+08	5.19329e+07	3.08275e+06	34.6356	0.58759	1.62602	0.0903777	38.4752
							#DIV/0!	#DIV/0!	#DIV/0!	#DIV/0!	#DIV/0!
																						6.51792
																						7.45221
																						6.90797
																					Object	Integral [abs]	Integral [rel]
																					Integral 1	1.6066e+06	0.7651
																					Integral 2	1.63721e+06	0.7797
																					Integral 3	2.44396e+07	11.6394
																					Object	Integral [abs]	Integral [rel]
																					Integral 1	1.04717e+07	0.8794
																					Integral 2	1.22008e+07	1.0247
																					Integral 3	1.68828e+08	14.1785
