# Supplementary material for: Mapping catalyst activation, turnover speciation and deactivation in Rh/PPh3-catalysed olefin hydroformylation
Source: Royal Society of Chemistry journal article supplement (doi:10.1039/d2cy00312k), 2022-01-01
Supplement: d2cy00312k11.xlsx [file d2cy00312k11.xlsx]

## Sheet: Proton
time [min]:	Peak name	1-hexene #1	1-heptanal #1	2-methylhexanal #1	Hydrogen #2	TMB aromatic #3	TMB methyl #9	1-hexene (other H double bond)	[1-hexene]	[1-heptanal]	[2-methylhexanal]	[Hydrogen]	[TMB aromatic]	[TMB methyl]	[1-hexene (other H double bond)]	Conversion	Regioselectivity n-heptanal	Regioselectivity 2-methylhexanal	PPh3/Rh= 10
0.0166667	I0	4.94001e+07	5535	-4942.5	-9731.75		2.12772e+08	1.12298e+08	460.44	0.0612613	-0.0504775	-0.00954302	0	86.6367	477.35	0	568.086	-468.086	-1.21364		INTERNAL REFERENCE			FLOW CALIBRATION
8.55	I1	45364944	-6498	5351.5	4457.75		210203370	1.04999e+08	427.996	-0.0727985	0.0553223	0.0044247	0	86.6367	451.777	7.04636	416.559	-316.559	-1.3159		1-hexene Volume (mL)	1.3			1-hexene (initial)	1-hexene (end)	1-heptanal (end)	2-methylhexanal (end)	Hydrogen (end)	TMB aromatic (initial)	TMB methyl (initial)	TMB aromatic (end)	TMB methyl (end)	1-hexene (other H double bond)
15.6833	I2	4.4333e+07	11630.5	-8109.75	10751841		207819825	1.02643e+08	423.057	0.131793	-0.0847979	10.7945	0	86.6367	446.707	8.11901	280.438	-180.438	-1.55421		1-hexene n (moles)	0.0104729		0 mL/min	29142933	4176547	20157390	6.62235e+06	1074285	2.00388e+07	62136918	20500117	6.30756e+07	6.17893e+06
22.8167	I3	4.43485e+07	135843	38090	1.12976e+07		2.09243e+08	1.02632e+08	420.326	1.52886	0.395571	11.2653	0	86.6367	443.619	8.712	79.4448	20.5552	3.86495		Reaction Volume (L)	0.0224		4 mL/min	6.75363e+06	987741	4.8867e+06	1.7202e+06	1.58738e+06	7.57361e+06	3.6012e+07	8.49335e+06	3.78577e+07	1.62179e+06
29.9667	I4	44084390	288359	99498.5	11116076		2.08826e+08	1.02286e+08	418.657	3.25186	1.03537	11.1064	0	86.6367	443.006	9.07448	75.8499	24.1501	3.14076		1-hexene (M)	0.467541		CF	4.31515	4.22838	4.12495	3.84975	0.676765	2.64587	1.72545	2.41367	1.66612	3.80995
37.0833	I5	4.35917e+07	607048	220998	1.09743e+07		209113917	1.01175e+08	413.409	6.83632	2.29651	10.9497	0	86.6367	437.593	10.2144	74.8543	25.1457	2.97683		1-hexene(mM)	467.541
44.2333	I6	42999404	980340	354208	1.07111e+07		209149277	99790644	407.722	11.0383	3.68016	10.6853	0	86.6367	431.531	11.4493	74.9963	25.0037	2.99941
51.3667	I7	4.21901e+07	1.44202e+06	523898	10510051		2.08606e+08	97939982	401.091	16.2789	5.4574	10.512	0	86.6367	424.632	12.8896	74.8927	25.1073	2.98291		# is the number of protons of the peak taken for integration			0 mL	static with long delay (flow+ full relaxtion effects)
58.5	I8	4.13772e+07	2.02083e+06	703619	10316375		2.09905e+08	9.6008e+07	390.929	22.672	7.28417	10.2545	0	86.6367	413.679	15.0967	75.6839	24.3161	3.1125		If #>1 the integration will be divided by the number of protons			4 mL	flow with shot delay (flow + poor relaxiation)
65.6167	I9	41210110	2652777	935678	1.02039e+07		2.10216e+08	9.55326e+07	388.774	29.7179	9.67222	10.1276	0	86.6367	411.022	15.5646	75.4451	24.5549	3.0725
73.6333	I10	4.25012e+07	3.5464e+06	1.28409e+06	1.00488e+07		2.10426e+08	97712523	400.554	39.6891	13.2606	9.9638	0	86.6367	419.982	13.0062	74.9562	25.0438	2.99301						initial CF were calculated under Argon ( the reactor was still no pressurized)
80.75	I11	3.90003e+07	4118978	1.50399e+06	9.85252e+06		2.09788e+08	9.07307e+07	368.678	46.2372	15.5787	9.79887	0	86.6367	391.159	19.9292	74.7983	25.2017	2.96798		INTERNAL REFERENCE STANDARD				final CF were calculated under 10 bar H2/CO ( reactor pressurized)
87.8833	I12	3.81997e+07	4956222	1.80252e+06	9841175		2.10098e+08	8.87439e+07	360.576	55.5535	18.6433	9.77314	0	86.6367	382.029	21.6888	74.8731	25.1269	2.97981		Mass of TMB (g)	0.3264
95	I13	3.70665e+07	5823939	2.09764e+06	9661470		2.1084e+08	86145135	348.648	65.0499	21.6194	9.56092	0	86.6367	369.537	24.2793	75.0553	24.9447	3.00887		Molecular weight of TMB (g/mol)	168.19
102.167	I14	35852458	6699248	2.41642e+06	9405262		209708000	83377477	339.049	75.2304	25.0393	9.35759	0	86.6367	359.594	26.3641	75.028	24.972	3.00449		Moles of TMB (n)	0.00194066
109.283	I15	3.46718e+07	7.70286e+06	2654093	9.22689e+06		2.09253e+08	8.05623e+07	328.597	86.6888	27.5619	9.2001	0	86.6367	348.208	28.6341	75.8759	24.1241	3.14524		Reaction Volume (L)	0.0224
116.417	I16	33658399	8.58822e+06	3.11027e+06	9.18273e+06		2.09942e+08	7.82681e+07	317.946	96.3355	32.1932	9.12601	0	86.6367	337.182	30.9474	74.9525	25.0475	2.99242		TMB (M)	0.0866367
123.517	I17	3.23115e+07	9508075	3.41802e+06	8952742		2.10362e+08	7.52317e+07	304.613	106.441	35.308	8.87969	0	86.6367	323.454	33.8429	75.0912	24.9088	3.01464		TMB (mM)	86.6367		FLOW CALIBRATION
130.667	I18	3.16974e+07	1.06329e+07	3.78579e+06	8932554		2.09594e+08	7.36025e+07	299.918	119.468	39.2502	8.8921	0	86.6367	317.608	34.8627	75.2706	24.7294	3.04377						1-hexene (initial)	1-hexene (end)	1-heptanal (end)	2-methylhexanal (end)	Hydrogen (end)	TMB aromatic (initial)	TMB methyl (initial)	TMB aromatic (end)	TMB methyl (end)	1-hexene (other H double bond)
137.767	I19	30091686	1.15917e+07	4.06089e+06	8.77386e+06		2.10194e+08	69944983	283.913	129.87	41.9822	8.70922	0	86.6367	300.964	38.3388	75.5708	24.4292	3.09346					0 mL/min	2.78016e+07	7.53593e+06	1.87317e+07	5722346	4.41821e+06	2.16925e+07	6.43757e+07	2.16584e+07	6.12478e+07	1.44223e+07
145.583	I20	3.03524e+07	1.33433e+07	4725477	8.6765e+06		2.10814e+08	6.98298e+07	285.53	149.055	48.7091	8.58722	0	86.6367	299.584	37.9876	75.3701	24.6299	3.0601					4 mL/min	6.11977e+06	1757276	3.67838e+06	1.21779e+06	3.89945e+06	7.34342e+06	3.6664e+07	7.98182e+06	3.63252e+07	3.68713e+06
152.75	I21	2.78863e+07	1.39446e+07	4.92246e+06	8.5063e+06		210608019	6.48056e+07	262.588	155.924	50.7893	8.42702	0	86.6367	278.302	42.9702	75.4301	24.5699	3.07001					CF	4.54292	4.28842	5.09238	4.69897	1.13304	2.954	1.75583	2.71347	1.6861	3.91153
159.867	I22	2.6545e+07	14932467	5283648	8.19531e+06		2.10148e+08	6.1755e+07	250.505	167.336	54.6353	8.13671	0	86.6367	265.782	45.5944	75.3863	24.6137	3.06278
167.017	I23	2.53245e+07	1.58506e+07	5.66765e+06	8.22097e+06		209259623	5.89561e+07	240.002	178.378	58.8548	8.19682	0	86.6367	254.813	47.8756	75.1911	24.8089	3.03082
174.133	I24	2.39542e+07	16946768	6.02822e+06	8.12359e+06		209592830	5.58358e+07	226.654	190.411	62.4996	8.08686	0	86.6367	240.943	50.7745	75.2879	24.7121	3.0466
181.267	I25	22613209	18007052	6.2982e+06	8.01125e+06		210400591	52626955	213.144	201.548	65.048	7.9444	0	86.6367	226.225	53.7085	75.6005	24.3995	3.09844
188.367	I26	2.15585e+07	1.88454e+07	6.67158e+06	7941016		209412844	5.02832e+07	204.161	211.925	69.2293	7.9119	0	86.6367	217.169	55.6596	75.3768	24.6232	3.06121
195.5	I27	2.04042e+07	1.98378e+07	6.90867e+06	7.78894e+06		2.08893e+08	4.75711e+07	193.711	223.642	71.8679	7.7797	0	86.6367	205.967	57.9291	75.68	24.32	3.11184
202.65	I28	1.94618e+07	2.07931e+07	7347373	7.60502e+06		2.0887e+08	4.54101e+07	184.785	234.436	76.4399	7.59683	0	86.6367	196.632	59.8678	75.4114	24.5886	3.06693
209.783	I29	1.81343e+07	21782478	7.68907e+06	7.63262e+06		2.09021e+08	4.23349e+07	172.055	245.414	79.9371	7.61889	0	86.6367	183.184	62.6324	75.4305	24.5695	3.07009
217.683	I30	17802797	2.39775e+07	8422463	7.55123e+06		2.0934e+08	4.11457e+07	168.654	269.733	87.4284	7.52618	0	86.6367	177.767	63.3712	75.5213	24.4787	3.08519
224.8	I31	1.57055e+07	2.37116e+07	8.31331e+06	7410750		2.08427e+08	3.67411e+07	149.436	267.91	86.673	7.41849	0	86.6367	159.432	67.545	75.5564	24.4436	3.09104
231.95	I32	1.47668e+07	25062345	8723860	7.38031e+06		2.08827e+08	3.43613e+07	140.236	282.629	90.7791	7.37387	0	86.6367	148.82	69.5431	75.689	24.311	3.11337
239.067	I33	1.35207e+07	2.58929e+07	9.02327e+06	7328284		2.09274e+08	31611731	128.127	291.372	93.6942	7.30626	0	86.6367	136.619	72.1729	75.668	24.332	3.10982
246.2	I34	1.26546e+07	2.6846e+07	9.2956e+06	7239003		2.08519e+08	2.95079e+07	120.354	303.191	96.8714	7.24337	0	86.6367	127.988	73.8611	75.7859	24.2141	3.12983
253.3	I35	11499682	2.73342e+07	9.5213e+06	7.1538e+06		208385343	2.70349e+07	109.44	308.902	99.2873	7.16272	0	86.6367	117.337	76.2314	75.6762	24.3238	3.11119
260.417	I36	1.06166e+07	28011484	9.73534e+06	7117833		2.07628e+08	24858342	101.405	317.711	101.89	7.1527	0	86.6367	108.284	77.9765	75.7175	24.2825	3.11819
268.133	I37	9.69121e+06	2.91538e+07	1.01467e+07	7.10787e+06		2.09872e+08	22753675	91.5762	327.133	105.06	7.06633	0	86.6367	98.0565	80.1111	75.6915	24.3085	3.11378
275.25	I38	8704612	2.95312e+07	1.02938e+07	7.08782e+06		208981437	2.05376e+07	82.6038	332.778	107.036	7.07641	0	86.6367	88.8832	82.0598	75.6633	24.3367	3.10902
282.35	I39	7957734	3.016e+07	1.041e+07	7.02398e+06		2.07789e+08	1.87608e+07	75.9496	341.815	108.866	7.05292	0	86.6367	81.6597	83.505	75.8441	24.1559	3.13977
290.25	I40	7.57667e+06	32258707	1.11589e+07	7.00215e+06		208209001	1.76836e+07	72.1668	364.863	116.462	7.01681	0	86.6367	76.8157	84.3266	75.8038	24.1962	3.13288
297.367	I41	6.53831e+06	3.12773e+07	10892138	7.00045e+06		2.07855e+08	15477496	62.3825	354.365	113.872	7.02706	0	86.6367	67.3471	86.4515	75.6807	24.3193	3.11196
304.483	I42	5.83424e+06	3.17215e+07	1.09943e+07	6.96028e+06		2.07469e+08	1.39046e+07	55.7685	360.066	115.153	6.99973	0	86.6367	60.6154	87.888	75.7684	24.2316	3.12684
311.583	I43	5.34906e+06	3.23074e+07	11203396	6931398		2.07413e+08	1.26948e+07	51.1446	366.816	117.376	6.97257	0	86.6367	55.3563	88.8922	75.7584	24.2416	3.12514
319.033	I44	4.76467e+06	32628812	1.12904e+07	6.91534e+06		2.07481e+08	1.14539e+07	45.5422	370.345	118.249	6.95416	0	86.6367	49.9292	90.109	75.798	24.202	3.1319

## Sheet: Hydride
time [min]:	Peak name	A/B	C	Riv 1	Riv 2	[A/B]	[C]	Sum Hyds	%			1	2
3.9	I0	3333.57		80.425	0	0.000664492	0	0.000664492	0.0267984	RG Calibration				Flow Calibration
11.0167	I1	-15370		-370.813	0	-0.00306375	0	-0.00306375	-0.123559		Hyd 1	Hyd 2			Hyd1	Hyd 2	1-hexene
18.15	I2	175829		4242.01	0	0.0350486	0	0.0350486	1.41348	CF	0.9894	0.9894		0 mL/min	2.04628e+06	1	29142933
25.2833	I3	346877		8368.68	0	0.0691442	0	0.0691442	2.78852	RG Hyd	203	203		4 mL/min	933902	1	6.75363e+06
32.4	I4	484518		11689.4	0	0.0965805	0	0.0965805	3.89501	RG 1H	4.5	9		CF	1.1	1	4.31515
39.55	I5	595328		14362.8	0	0.118669	0	0.118669	4.78581	Int TMB	9.43726e+07	65984307
46.7	I6	705274		17015.3	0	0.140585	0	0.140585	5.66965	[TMB]	86.6367	467.541
53.8333	I7	831139		20051.9		0.165674		0.165674	6.68147
60.9333	I8	914402		22060.7		0.182271		0.182271	7.35082	IRF	45.5944	22.7972
68.0667	I9	1.00211e+06		24176.7		0.199754		0.199754	8.05592
76.0833	I10	1.07404e+06		25912.1		0.214092		0.214092	8.63416
83.2	I11	1.20549e+06		29083.4		0.240295		0.240295	9.69087
90.3167	I12	1.29712e+06		31294.1		0.25856		0.25856	10.4275
97.45	I13	1.33504e+06		32208.8		0.266118		0.266118	10.7323
104.617	I14	1.43292e+06		34570.2		0.285628		0.285628	11.5191
111.733	I15	1.49146e+06		35982.7		0.297298		0.297298	11.9898
118.85	I16	1.58915e+06		38339.5		0.31677		0.31677	12.7751
125.967	I17	1.66994e+06		40288.5		0.332874		0.332874	13.4245
133.1	I18	1.73524e+06		41864		0.345891		0.345891	13.9495
140.217	I19	1.7356e+06		41872.6		0.345962		0.345962	13.9524
148.033	I20	1.89758e+06		45780.7		0.378252		0.378252	15.2546
155.183	I21	2.00215e+06		48303.3		0.399094		0.399094	16.0951
162.333	I22	2.05652e+06		49615		0.409932		0.409932	16.5322
169.45	I23	2.12138e+06		51179.9		0.422861		0.422861	17.0536
176.583	I24	2.21835e+06		53519.4		0.442191		0.442191	17.8332
183.7	I25	2.26401e+06		54620.9		0.451292		0.451292	18.2002
190.833	I26	2.37476e+06		57292.9		0.473368		0.473368	19.0905
197.967	I27	2.39031e+06		57668.1		0.476468		0.476468	19.2156
205.117	I28	2.46166e+06		59389.5		0.490691		0.490691	19.7892
212.233	I29	2.57877e+06		62214.8		0.514035		0.514035	20.7306
220.133	I30	2.6642e+06		64275.8		0.531063		0.531063	21.4173
227.25	I31	2.71783e+06		65569.7		0.541754		0.541754	21.8484
234.4	I32	2.82193e+06		68081.2		0.562504		0.562504	22.6853
241.517	I33	2.82762e+06		68218.5		0.563639		0.563639	22.7311
248.65	I34	2.91337e+06		70287.3		0.580731		0.580731	23.4204
255.767	I35	3.0007e+06		72394.1		0.598139		0.598139	24.1224
262.9	I36	3.07214e+06		74117.6		0.612379		0.612379	24.6967
270.583	I37	3.17183e+06		76522.9		0.632252		0.632252	25.4982
277.7	I38	3.23117e+06		77954.6		0.64408		0.64408	25.9752
284.8	I39	3.26445e+06		78757.3		0.650713		0.650713	26.2427
292.7	I40	3.34625e+06		80730.9		0.667019		0.667019	26.9003
299.817	I41	3.40608e+06		82174.3		0.678945		0.678945	27.3813			Rh concentration
306.917	I42	3.44339e+06		83074.3		0.686381		0.686381	27.6812			actual weight (g)	0.0135
314.017	I43	3.50919e+06		84661.9		0.699498		0.699498	28.2102			MW RhHCO(PPh3)3 (g/mol)	918.78
321.5	I44	3.54472e+06		85519.1		0.706581		0.706581	28.4958			MW Rh(acac)(CO)2 (g/mol)	258.03
				0		0		0	0			Number of mol (n)	5.23195e-05
				0		0		0	0			actual volume of reaction (L)	0.0211
				0		0		0	0			[Rh] (M)	0.0024796
				0		0		0	0			[Rh] (mM)	2.4796
												0

## Sheet: Phosphorus
time [min]:	Peak name	internal standard #1	OPPh3	PPh3	A/B	Q	[PPh3]	[OPPh3]	}A/B]	[Q]	total phosphorus	%	when phosphorus source is PPH3
7.7	I0	1.19727e+08	1.44713e+06	3.32128e+06	444505	-178822	0.467073	0.250359	0.0152235	-0.0120504	0.747879	-0.485984
14.8333	I1	118962347	844722	3232714	860153	-240930	0.457539	0.147079	0.0296481	-0.0163401	0.663914	-0.658981	INTERNAL REFERENCE (CF SPECTRUM)			FLOW CALIBRATION
21.9667	I2	1.1968e+08	1215470	3.16384e+06	1.74812e+06	663347	0.445107	0.210363	0.0598936	0.0447192	0.775257	1.80348	Triphenylphosphine mass (g)	0.0398			Triphenylphosphosphate	Peak 1	Peak 2	Peak 3
29.1167	I3	1.19707e+08	891054	3.76252e+06	1.79171e+06	1.25557e+06	0.529212	0.154181	0.0613733	0.0846242	0.806139	3.41282	Triphenylphosphine n (moles)	0.00015174		0 mL/min	4.15418e+07	9.49461e+06	2.8405e+06	4.47085e+06
36.2333	I4	1.20611e+08	1.3265e+06	3.66699e+06	2.03847e+06	2.51042e+06	0.511908	0.227806	0.069302	0.167931	0.878319	6.77252	Reaction Volume (L)	0.0224		4 mL/min	1.21515e+07	2.39456e+06	582329	2.31499e+06
43.3833	I5	1.20954e+08	1.65739e+06	4.61633e+06	2.16611e+06	2.76391e+06	0.642612	0.283827	0.0734332	0.184365	1.0733	7.43529	Triphenylphosphine concentration (M)	0.00677413		CF	3.41867	3.96507	4.87783	1.93126	1.9
50.5333	I6	1.20846e+08	1.61744e+06	4.87417e+06	3.96853e+06	4.06723e+06	0.679107	0.27723	0.134656	0.271543	1.22565	10.9511	Triphenylphosphine concentration (mM)	6.77413			internal standard				acyl cpmplex
57.6667	I7	1.22168e+08	1.88391e+06	4.85289e+06	5.92353e+06	4.55802e+06	0.668829	0.319411	0.198818	0.301019	1.38588	12.1398
64.7667	I8	1.22352e+08	2.50588e+06	6.56034e+06	6.0106e+06	4.87582e+06	0.902787	0.424225	0.201436	0.321521	1.72988	12.9667
71.9167	I9	1.21571e+08	2.54034e+06	6.08544e+06	6.12005e+06	5.48312e+06	0.842813	0.43282	0.206421	0.363891	1.68848	14.6754	[Triphenylphosphate] ACTUAL EXPERIMENT
79.9167	I10	1.2168e+08	1.85235e+06	7.16668e+06	6.1395e+06	5.77392e+06	0.991674	0.315318	0.206892	0.382847	1.72078	15.4399	Triphenylphosphate mass (g)	0.1061
87.05	I11	1.22604e+08	2.32232e+06	8127091	7.7595e+06	5.79312e+06	1.11609	0.39234	0.259513	0.381224	2.02746	15.3744	Triphenylphosphate n (moles)	0.000325181
94.15	I12	1.23389e+08	3.39455e+06	8.06314e+06	7.11265e+06	6.82478e+06	1.10027	0.569841	0.236367	0.446259	2.14285	17.9972	Reaction Volume (L)	0.0224
101.333	I13	1.23146e+08	2.41927e+06	9.98798e+06	7.39015e+06	7.04475e+06	1.36561	0.406921	0.246073	0.46155	2.26468	18.6139	Triphenylphosphate concentration (M)	0.014517
108.45	I14	1.2259e+08	2.71994e+06	9.7988e+06	8848947	6.44912e+06	1.34583	0.459571	0.295984	0.424444	2.39737	17.1175	Triphenylphosphate concentration (mM)	14.517
115.567	I15	123100270	2.69962e+06	1.13889e+07	9.64613e+06	7.57538e+06	1.55773	0.454244	0.32131	0.496499	2.6546	20.0234
122.683	I16	1.23435e+08	3.67235e+06	1.18457e+07	9.83999e+06	6.54445e+06	1.61582	0.616243	0.326878	0.427767	2.88582	17.2515
129.8	I17	1.22971e+08	3.47817e+06	1.31368e+07	8.54835e+06	7.30233e+06	1.79869	0.585859	0.285041	0.479105	2.95463	19.3219
136.933	I18	1.22955e+08	3.35511e+06	1.33778e+07	1.00431e+07	7.08734e+06	1.83193	0.565206	0.334926	0.465061	3.06699	18.7555
144.05	I19	1.2287e+08	2.97671e+06	16448211	1.09557e+07	8.03565e+06	2.25395	0.501809	0.365617	0.527655	3.48699	21.2799
151.867	I20	1.23293e+08	3.75511e+06	1.65429e+07	1.05348e+07	7.94487e+06	2.25914	0.630854	0.350363	0.519901	3.59072	20.9672
159.017	I21	1.22528e+08	3.03732e+06	1.78035e+07	1.19185e+07	7.79997e+06	2.44648	0.513454	0.398856	0.513607	3.75764	20.7133	when phosphorus source is RhHCOPPh33
166.15	I22	1.22561e+08	3.99445e+06	1.84586e+07	1.21218e+07	7.18637e+06	2.53582	0.675074	0.40555	0.473077	4.022	19.0788
173.283	I23	1.22077e+08	3.65623e+06	1.88255e+07	1.29261e+07	7.7474e+06	2.59647	0.620365	0.434177	0.512032	4.08519	20.6498	Rh concentration
180.417	I24	1.22824e+08	3.68415e+06	1.86239e+07	1.2756e+07	7.83984e+06	2.55306	0.621301	0.425856	0.514991	4.02607	20.7691	actual weight (g)	0.0135
187.533	I25	122326314	3.83499e+06	1.94027e+07	1.23516e+07	7.08509e+06	2.67063	0.649367	0.414032	0.467304	4.14806	18.8459	MW RhHCO(PPh3)3 (g/mol)	918.78
194.667	I26	1.23008e+08	4.68303e+06	1.8502e+07	1.30076e+07	7.09369e+06	2.53255	0.788572	0.433605	0.465279	4.18833	18.7643	MW Rh(acac)(CO)2 (g/mol)	258.03
201.8	I27	1.24312e+08	3.5771e+06	1.8126e+07	1.43708e+07	6.91067e+06	2.45503	0.596023	0.474022	0.448517	3.9991	18.0883	Number of mol (n)	5.23195e-05
208.95	I28	1.24155e+08	4.57303e+06	1.9085e+07	1.38593e+07	6.94447e+06	2.5882	0.762932	0.457727	0.451282	4.26658	18.1998	actual volume of reaction (L)	0.0211
216.067	I29	1.24345e+08	3.89802e+06	1.9775e+07	1.42929e+07	6.95479e+06	2.67769	0.649327	0.471328	0.451263	4.26967	18.199	[Rh] (M)	0.0024796
223.967	I30	1.24424e+08	4.00921e+06	1.88624e+07	1.55986e+07	6.59543e+06	2.55249	0.667423	0.514059	0.427674	4.24803	17.2477	[Rh] (mM)	2.4796		[PPh3]	7.43879
231.1	I31	1.243e+08	3.69089e+06	1.88291e+07	1.56376e+07	6.79148e+06	2.55053	0.615046	0.515857	0.440827	4.19729	17.7782
238.233	I32	1.25231e+08	4.00805e+06	1.9127e+07	16586948	6412787	2.57162	0.662931	0.543107	0.413151	4.32076	16.662
245.35	I33	1.24298e+08	4206236	1.86621e+07	1.73098e+07	6.07071e+06	2.52793	0.70093	0.571026	0.394046	4.37091	15.8916
252.483	I34	124389379	4.42596e+06	1.86903e+07	1.74156e+07	5.50569e+06	2.5299	0.737006	0.574099	0.35711	4.41511	14.4019
259.6	I35	1.24092e+08	3.99156e+06	2.02583e+07	1.70907e+07	4989719	2.74873	0.666264	0.564739	0.32442	4.54447	13.0836
267.3	I36	1.24313e+08	4.04376e+06	1.925e+07	1.85924e+07	5.94548e+06	2.60726	0.673775	0.613265	0.385872	4.50756	15.5619
274.417	I37	1.23611e+08	4.48509e+06	19572032	1.79532e+07	5.26245e+06	2.66593	0.751553	0.595546	0.343482	4.60857	13.8523
281.517	I38	1.23292e+08	5.19984e+06	2.02657e+07	1.86069e+07	4.76315e+06	2.76756	0.873577	0.618827	0.311696	4.87878	12.5704
288.633	I39	1.23248e+08	4.36063e+06	1.92509e+07	1.89169e+07	4.53136e+06	2.62991	0.732849	0.62936	0.296634	4.62148	11.963
296.517	I40	1.23094e+08	4.72926e+06	1.97023e+07	1.99099e+07	4.41915e+06	2.69495	0.795798	0.663229	0.289652	4.8172	11.6814
303.65	I41	1.23238e+08	5.00208e+06	20093615	1.92476e+07	4.43937e+06	2.74526	0.840722	0.640416	0.290637	4.86682	11.7211
310.75	I42	1.23367e+08	4.71305e+06	18632357	21844507	3.82308e+06	2.54297	0.791318	0.726064	0.250028	4.78641	10.0834
318.2	I43	1.23404e+08	4996890	1.94236e+07	1.96042e+07	4.34287e+06	2.65015	0.83872	0.651405	0.283937	4.79168	11.4509
325.35	I44	1.22738e+08	4.80879e+06	1.87221e+07	2.1475e+07	3.37265e+06	2.56831	0.811529	0.717441	0.221701	4.81472	8.94099
																						6.51792
																						7.45221
																						6.90797
																					Object	Integral [abs]	Integral [rel]
																					Integral 1	1.6066e+06	0.7651
																					Integral 2	1.63721e+06	0.7797
																					Integral 3	2.44396e+07	11.6394
																					Object	Integral [abs]	Integral [rel]
																					Integral 1	1.04717e+07	0.8794
																					Integral 2	1.22008e+07	1.0247
																					Integral 3	1.68828e+08	14.1785
