# Supplementary material for: Mapping catalyst activation, turnover speciation and deactivation in Rh/PPh3-catalysed olefin hydroformylation
Source: Royal Society of Chemistry journal article supplement (doi:10.1039/d2cy00312k), 2022-01-01
Supplement: d2cy00312k12.xlsx [file d2cy00312k12.xlsx]

## Sheet: Proton
time [min]:	Peak name	1-hexene #1	1-heptanal #1	2-methylhexanal #1	Hydrogen #2	TMB aromatic #3	TMB methyl #9	1-hexene (other H double bond)	[1-hexene]	[1-heptanal]	[2-methylhexanal]	[Hydrogen]	[TMB aromatic]	[TMB methyl]	[1-hexene (other H double bond)]	Conversion	Regioselectivity n-heptanal	Regioselectivity 2-methylhexanal	PPh3/Rh= 10
0.0166667	I0	2.31676e+07	5906.25	-9160	2521.38	1.94694e+07	7.48205e+07	5.22393e+07	522.637	0.158218	-0.226423	0.0100187	92.6361	73.7368	537.449	0	-231.972	331.972	-0.698769		INTERNAL REFERENCE
5.88333	I1	2.1649e+07	-331	3420.88	3425.62	1.9118e+07	7.44307e+07	4.94456e+07	490.938	-0.00891333	0.0850025	0.0136831	91.4406	73.7368	511.371	6.06518	-11.7143	111.714	-0.10486		1-hexene Volume (mL)	1.3
11.6	I2	2.11259e+07	3386	-114.375	3954111	1.89992e+07	7.45778e+07	4.86582e+07	478.131	0.0910001	-0.00283641	15.7629	90.693	73.7368	502.235	8.51575	103.217	-3.2172	-32.0829		1-hexene n (moles)	0.0104729
17.3667	I3	21147044	66770.2	14899.2	4.31339e+06	1.90927e+07	7.45552e+07	4.86412e+07	478.754	1.79502	0.369601	17.2003	91.167	73.7368	502.212	8.39646	82.9254	17.0746	4.85664		Reaction Volume (L)	0.0224
23.1	I4	2.10577e+07	208914	59169.2	4.20381e+06	1.92188e+07	7.48463e+07	4.8465e+07	474.876	5.59451	1.46208	16.6981	91.4118	73.7368	498.447	9.13838	79.2806	20.7194	3.8264		1-hexene (M)	0.467541							1.13304
28.8333	I5	2.06394e+07	411178	131121	4.10352e+06	1.91461e+07	7.50312e+07	4.76607e+07	464.297	10.9838	3.23203	16.2596	90.842	73.7368	488.967	11.1627	77.2645	22.7355	3.39841		1-hexene(mM)	467.541
34.5833	I6	2.04372e+07	680784	223213	4.00608e+06	1.92541e+07	7.53117e+07	4.71827e+07	458.036	18.118	5.48156	15.8144	91.0142	73.7368	482.26	12.3605	76.7727	23.2273	3.30527
40.3167	I7	2.00859e+07	972292	325243	3.92692e+06	1.93576e+07	7.56241e+07	4.63845e+07	448.303	25.7692	7.95417	15.4379	91.1251	73.7368	472.143	14.2228	76.4135	23.5865	3.23971
46.05	I8	2.00413e+07	1.31428e+06	445068	3.8416e+06	1.94533e+07	7.56016e+07	4.59277e+07	447.44	34.8433	10.8878	15.107	91.6031	73.7368	467.632	14.3879	76.1916	23.8084	3.20021
51.8333	I9	1.95062e+07	1.6621e+06	553071	3.78566e+06	1.93927e+07	7.5303e+07	4.48785e+07	437.221	44.2394	13.5836	14.946	91.6797	73.7368	458.761	16.3433	76.5083	23.4917	3.25682
57.55	I10	1.88601e+07	2.03631e+06	687089	3.70808e+06	1.93812e+07	7.54049e+07	4.34444e+07	422.168	54.1263	16.8523	14.6199	91.5018	73.7368	443.501	19.2236	76.2572	23.7428	3.2118
63.2667	I11	1.82731e+07	2.39376e+06	798148	3.65573e+06	1.93115e+07	7.55073e+07	4.21139e+07	408.473	63.5414	19.5498	14.394	91.0489	73.7368	429.336	21.8439	76.4719	23.5281	3.25024		INTERNAL REFERENCE STANDARD
69.0167	I12	1.78663e+07	2.7941e+06	937361	3.6101e+06	1.94348e+07	7.58668e+07	4.12318e+07	397.487	73.8166	22.8508	14.147	91.1958	73.7368	418.352	23.9459	76.3614	23.6386	3.23037		Mass of TMB (g)	0.2778
74.7333	I13	1.75631e+07	3.24403e+06	1.0682e+06	3.5614e+06	1.96351e+07	7.62836e+07	40502045	388.607	85.2349	25.8982	13.8799	91.6327	73.7368	408.702	25.6449	76.6963	23.3037	3.29116		Molecular weight of TMB (g/mol)	168.19
80.5167	I14	1.71496e+07	3.66671e+06	1.2063e+06	3.50705e+06	1.95099e+07	7.58125e+07	3.96267e+07	381.817	96.9394	29.4281	13.753	91.6141	73.7368	402.353	26.9442	76.7123	23.2877	3.29411		Moles of TMB (n)	0.0016517
86.2667	I15	16637395	4.09883e+06	1.36177e+06	3.44424e+06	1.94748e+07	7.5662e+07	3.83294e+07	371.149	108.579	33.2868	13.5335	91.631	73.7368	389.955	28.9853	76.5364	23.4636	3.26193		Reaction Volume (L)	0.0224
92.05	I16	1.62895e+07	4636738	1535151	3.40701e+06	1.9605e+07	7.59505e+07	3.75292e+07	362.008	122.362	37.3824	13.3364	91.8935	73.7368	380.364	30.7344	76.5986	23.4014	3.27325		TMB (M)	0.0737368
97.8	I17	1.56135e+07	4968488	1.65232e+06	3.38311e+06	1.95653e+07	7.59584e+07	3.6044e+07	346.948	131.103	40.2314	13.2415	91.6977	73.7368	365.273	33.6159	76.5188	23.4812	3.25873		TMB (mM)	73.7368		FLOW CALIBRATION
103.55	I18	1.5183e+07	5.41462e+06	1790543	3.34207e+06	1.95444e+07	7.58724e+07	34962675	337.765	143.037	43.6463	13.0957	91.7036	73.7368	354.717	35.373	76.6201	23.3799	3.27718						1-hexene (initial)	1-hexene (end)	1-heptanal (end)	2-methylhexanal (end)	Hydrogen (end)	TMB aromatic (initial)	TMB methyl (initial)	TMB aromatic (end)	TMB methyl (end)	1-hexene (other H double bond)
109.3	I19	1.47617e+07	5.90495e+06	1.95199e+06	3.30907e+06	1.97222e+07	7.62139e+07	3.40505e+07	326.92	155.291	47.3685	12.9082	92.1231	73.7368	343.914	37.448	76.6266	23.3734	3.27836					0 mL/min	2.78016e+07	7.53593e+06	1.87317e+07	5722346	4.41821e+06	2.16925e+07	6.43757e+07	2.16584e+07	6.12478e+07	1.44223e+07
115.05	I20	1.43347e+07	6.32047e+06	2.08576e+06	3.27486e+06	1.97514e+07	7.62619e+07	3.30891e+07	317.265	166.114	50.5828	12.7668	92.2015	73.7368	333.993	39.2954	76.6573	23.3427	3.284					4 mL/min	6.11977e+06	1757276	3.67838e+06	1.21779e+06	3.89945e+06	7.34342e+06	3.6664e+07	7.98182e+06	3.63252e+07	3.68713e+06
120.783	I21	1.37304e+07	6.61508e+06	2.17835e+06	3.26681e+06	1.96601e+07	7.63289e+07	3.16667e+07	303.623	173.704	52.782	12.7242	91.6947	73.7368	319.355	41.9056	76.6953	23.3047	3.29098					CF	4.54292	4.28842	5.09238	4.69897	1.13304	2.954	1.75583	2.71347	1.6861	3.91153
126.517	I22	13230518	6983071	2.29111e+06	3.22251e+06	1.9665e+07	7.64351e+07	3.05997e+07	292.163	183.113	55.4371	12.5342	91.5903	73.7368	308.166	44.0983	76.7608	23.2392	3.30307
132.267	I23	1.29841e+07	7.3931e+06	2.42589e+06	3188708	19719610	7.62742e+07	2.99777e+07	287.327	194.273	58.822	12.4289	92.0382	73.7368	302.539	45.0236	76.7589	23.2411	3.30273
138.017	I24	1.24388e+07	7.69192e+06	2.53023e+06	3.14392e+06	1.95932e+07	75951323	2.87566e+07	276.429	202.985	61.6128	12.3064	91.8368	73.7368	291.45	47.1089	76.7145	23.2855	3.29453
143.767	I25	1.19635e+07	8.109e+06	2.66331e+06	3098329	19602374	7.61386e+07	2.76714e+07	265.212	213.465	64.694	12.0981	91.654	73.7368	279.761	49.255	76.7421	23.2579	3.29961
149.517	I26	1.16504e+07	8.5186e+06	2.78452e+06	3.06685e+06	1.96508e+07	7.58707e+07	2.69318e+07	259.184	225.039	67.8771	12.0175	92.205	73.7368	273.245	50.4083	76.8271	23.1729	3.31539
155.25	I27	1.11323e+07	8.84092e+06	2896143	3.03679e+06	19612079	7.60433e+07	2.5789e+07	247.096	233.024	70.4378	11.8727	91.8143	73.7368	261.056	52.7212	76.7886	23.2114	3.30822
160.983	I28	1.05258e+07	9.06743e+06	2.96033e+06	3.01896e+06	1.94338e+07	7.56366e+07	2.44041e+07	234.89	240.279	72.3861	11.8664	91.4687	73.7368	248.366	55.0567	76.8487	23.1513	3.31941
166.75	I29	10301921	9.55657e+06	3.12454e+06	2.99556e+06	1.95441e+07	7.5802e+07	2.38459e+07	229.392	252.688	76.2345	11.7488	91.7874	73.7368	242.155	56.1088	76.823	23.177	3.31462
172.483	I30	9.88886e+06	9.80231e+06	3.20259e+06	2.97451e+06	1.94796e+07	7.57024e+07	2.29009e+07	220.484	259.527	78.2417	11.6816	91.6046	73.7368	232.865	57.8132	76.8357	23.1643	3.31699
178.217	I31	9.465e+06	1.00724e+07	3.28232e+06	2.96374e+06	1.94952e+07	7.57826e+07	2.19307e+07	210.81	266.397	80.1048	11.627	91.5812	73.7368	222.764	59.6641	76.8819	23.1181	3.32561
183.95	I32	9.24465e+06	1.04995e+07	3.41728e+06	2.93049e+06	1.96027e+07	7.59863e+07	2.14389e+07	205.351	276.949	83.1747	11.4657	91.8393	73.7368	217.184	60.7088	76.9038	23.0962	3.32972
189.683	I33	8882185	1.06603e+07	3468817	2.91931e+06	1.95238e+07	7.5627e+07	2.06097e+07	198.236	282.525	84.8303	11.4762	91.9039	73.7368	209.776	62.07	76.9078	23.0922	3.33047
195.383	I34	8.58623e+06	1.09742e+07	3.59241e+06	2.9036e+06	1.96198e+07	7.59416e+07	1.99336e+07	190.837	289.638	87.4888	11.3672	91.9736	73.7368	202.053	63.4857	76.8012	23.1988	3.31057
201.117	I35	8.50748e+06	1.15852e+07	3.7718e+06	2.89262e+06	1.99056e+07	76539341	1.97445e+07	187.61	303.377	91.1404	11.2358	92.5843	73.7368	198.574	64.1031	76.8983	23.1017	3.32868
206.833	I36	8.24762e+06	1.18009e+07	3.82603e+06	2.88846e+06	1.98472e+07	7.68063e+07	1.89432e+07	181.248	307.952	92.1294	11.1806	91.992	73.7368	189.853	65.3206	76.9723	23.0277	3.34261
212.567	I37	7868710	1.20812e+07	3.9149e+06	2.86926e+06	1.99688e+07	7.68357e+07	1.82848e+07	172.855	315.145	94.2334	11.102	92.5203	73.7368	183.184	66.9264	76.9814	23.0186	3.3443
218.317	I38	7.52458e+06	1.22396e+07	3.9796e+06	2.84352e+06	19781919	7.63877e+07	1.7487e+07	166.264	321.151	96.3525	11.067	92.1919	73.7368	176.219	68.1874	76.9218	23.0782	3.33309
224.1	I39	7.31598e+06	1.26857e+07	4.12252e+06	2807460	1.99275e+07	7.65142e+07	1.69445e+07	161.388	332.305	99.6477	10.9086	92.717	73.7368	170.47	69.1204	76.9309	23.0691	3.3348
229.833	I40	6.90885e+06	1.26758e+07	4122294	2.79886e+06	1.97322e+07	76129684	1.60257e+07	153.177	333.724	100.146	10.9301	92.2718	73.7368	162.04	70.6916	76.918	23.082	3.33239
235.567	I41	6.74565e+06	1.3124e+07	4251014	2.79328e+06	1.98809e+07	7.65844e+07	1.54996e+07	148.67	343.472	102.659	10.8435	92.415	73.7368	155.791	71.5538	76.989	23.011	3.34574
241.3	I42	6.40975e+06	1.33987e+07	4.34242e+06	2.78592e+06	19998969	7.67857e+07	1.49182e+07	140.897	349.742	104.592	10.7866	92.7204	73.7368	149.554	73.0412	76.9791	23.0209	3.34387
247.033	I43	6.14348e+06	13491533	4.36803e+06	2.7642e+06	1.98327e+07	7.64122e+07	1.42418e+07	135.704	353.886	105.723	10.7548	92.3987	73.7368	143.47	74.0348	76.9971	23.0029	3.34729
252.733	I44	5.94324e+06	13764344	4.45314e+06	2762023	1.99164e+07	7.67281e+07	1.3733e+07	130.74	359.555	107.339	10.7021	92.4071	73.7368	137.776	74.9845	77.0099	22.9901	3.34971
258.433	I45	5.57148e+06	1.37991e+07	4461817	2.74762e+06	1.97902e+07	7.64678e+07	1.29847e+07	122.98	361.69	107.915	10.6825	92.1338	73.7368	130.711	76.4694	77.0201	22.9799	3.35164
264.133	I46	5.4541e+06	1.4265e+07	4617012	2.74154e+06	1.99992e+07	7.71907e+07	1.2598e+07	119.261	370.399	110.622	10.5591	92.2349	73.7368	125.631	77.1809	77.0026	22.9974	3.34832
269.9	I47	5296712	1.46869e+07	4.75835e+06	2.74526e+06	20071842	7.72872e+07	1.22711e+07	115.675	380.878	113.866	10.5602	92.4543	73.7368	122.218	77.867	76.9848	23.0152	3.34496
275.633	I48	5.0286e+06	1.47753e+07	4.77587e+06	2.72134e+06	2.00823e+07	7.71997e+07	1.16533e+07	109.944	383.605	114.415	10.48	92.6074	73.7368	116.197	78.9636	77.026	22.974	3.35274
281.367	I49	4824414	1.4975e+07	4835819	2.70748e+06	2.00536e+07	7.7081e+07	1.11575e+07	105.642	389.389	116.03	10.4427	92.6173	73.7368	111.424	79.7867	77.0429	22.9571	3.35594
287.117	I50	4.59647e+06	1.50848e+07	4.87981e+06	2.70737e+06	1.99144e+07	7.65686e+07	1.07042e+07	101.324	394.868	117.869	10.5122	92.59	73.7368	107.613	80.6129	77.0118	22.9882	3.35007
292.85	I51	4.38645e+06	15201626	4913409	2.69289e+06	1.99413e+07	7.67521e+07	1.0165e+07	96.4638	396.976	118.397	10.431	92.4932	73.7368	101.948	81.5429	77.027	22.973	3.35293
298.583	I52	4.16538e+06	1.53247e+07	4.95648e+06	2.69202e+06	1.99239e+07	7.67725e+07	9.68838e+06	91.5777	400.082	119.403	10.4248	92.3879	73.7368	97.1418	82.4778	77.0152	22.9848	3.3507
304.3	I53	3.95745e+06	15453890	4.97633e+06	2.68636e+06	1.98449e+07	76562426	9.19557e+06	87.245	404.563	120.21	10.4314	92.2743	73.7368	92.4536	83.3068	77.093	22.907	3.36547
310.067	I54	3.88854e+06	1.59735e+07	5.15831e+06	2.6991e+06	2.01607e+07	77160687	9.01128e+06	85.0611	414.924	123.64	10.3996	93.0156	73.7368	89.8982	83.7246	77.0427	22.9573	3.35591
315.817	I55	3.65858e+06	1.5963e+07	5.16506e+06	2678418	20156527	7.70991e+07	8.54862e+06	80.0948	414.983	123.9	10.3282	93.0709	73.7368	85.3507	84.6749	77.0079	22.9921	3.34933
321.567	I56	3.55445e+06	1.63007e+07	5.26229e+06	2.68189e+06	2.01853e+07	7.72776e+07	8.21841e+06	77.6353	422.783	125.941	10.3177	92.9884	73.7368	81.8644	85.1455	77.0484	22.9516	3.35699
327.283	I57	3.32402e+06	1.62415e+07	5228482	2.67972e+06	2.00823e+07	7.73686e+07	7.74546e+06	72.5168	420.752	124.985	10.2972	92.4052	73.7368	77.0625	86.1248	77.098	22.902	3.36643
333.05	I58	3.25578e+06	16589263	5.35983e+06	2.65821e+06	2.01915e+07	7.7325e+07	7.55652e+06	71.0682	430.003	128.197	10.2204	92.96	73.7368	75.225	86.402	77.0339	22.9661	3.35424
338.783	I59	3.03352e+06	1.6502e+07	5.33139e+06	2.66195e+06	2.01616e+07	7.74614e+07	7122371	66.1002	426.989	127.292	10.2167	92.6592	73.7368	70.7783	87.3526	77.0347	22.9653	3.35439
344.517	I60	2.92384e+06	1.67246e+07	5.3893e+06	2.63976e+06	2.01306e+07	7.73042e+07	6822218	63.8397	433.628	128.936	10.1521	92.7044	73.7368	67.9334	87.7851	77.0806	22.9194	3.36311
350.233	I61	2.793e+06	1.67308e+07	5.39902e+06	2.64303e+06	20047610	77027232	6492091	61.2023	435.348	129.634	10.2013	92.6544	73.7368	64.8785	88.2897	77.0552	22.9448	3.3583
355.933	I62	2670794	1.67817e+07	5.40632e+06	2.63818e+06	1.99777e+07	76909537	6.19819e+06	58.6139	437.341	130.008	10.1981	92.4724	73.7368	62.0362	88.785	77.0851	22.9149	3.36397
361.667	I63	2551211	1.69427e+07	5460770	2.63471e+06	2.00353e+07	7.70948e+07	5.92856e+06	55.855	440.475	131.001	10.1602	92.5164	73.7368	59.195	89.3129	77.0767	22.9233	3.36237
367.367	I64	2.38598e+06	1.68896e+07	5.44847e+06	2.63044e+06	2.00141e+07	76982641	5.59348e+06	52.3137	439.736	130.897	10.1585	92.553	73.7368	55.9307	89.9904	77.0611	22.9389	3.35941
373.117	I65	2.30577e+06	1.73632e+07	5.58945e+06	2.62608e+06	20298480	7.73472e+07	5.41372e+06	50.3166	449.934	133.651	10.0939	93.4258	73.7368	53.8781	90.3725	77.0983	22.9017	3.36649
378.867	I66	2.23417e+06	1.75534e+07	5.6487e+06	2.62403e+06	2.02259e+07	7.7217e+07	5.21936e+06	48.8365	455.631	135.295	10.103	93.2488	73.7368	52.0314	90.6557	77.1045	22.8955	3.36768
384.633	I67	2.10071e+06	1.76414e+07	5.68151e+06	2.61594e+06	20272021	7.7531e+07	4.9354e+06	45.7332	456.061	135.53	10.0311	93.0827	73.7368	49.0013	91.2495	77.0906	22.9094	3.36502
390.35	I68	1.97106e+06	1.735e+07	5.59279e+06	2.59234e+06	2.00391e+07	77185462	4.62922e+06	43.1028	450.535	134.011	9.98511	92.4252	73.7368	46.1671	91.7528	77.0744	22.9256	3.36194
396.083	I69	1862734	1.75291e+07	5.63279e+06	2601223	2.00983e+07	7.74463e+07	4.41787e+06	40.5967	453.651	134.515	9.98556	92.3858	73.7368	43.9109	92.2323	77.1298	22.8702	3.37251
401.85	I70	1820492	1.78014e+07	5.72331e+06	2581972	2.01611e+07	7.71881e+07	4.24598e+06	39.8088	462.24	137.134	9.94482	92.9848	73.7368	42.3436	92.3831	77.1205	22.8795	3.37073
407.6	I71	1.71738e+06	1.78012e+07	5.72184e+06	2.57861e+06	2.02026e+07	7.7273e+07	4.03685e+06	37.5127	461.727	136.948	9.92095	93.0736	73.7368	40.2139	92.8224	77.1249	22.8751	3.37156
413.3	I72	1.60418e+06	1.77527e+07	5.72823e+06	2.57186e+06	2.01169e+07	7.70957e+07	3.84584e+06	35.1207	461.528	137.416	9.91777	92.8922	73.7368	38.3992	93.2801	77.057	22.943	3.35862
419.017	I73	1.55502e+06	1.78486e+07	5744573	2.56579e+06	2.00417e+07	7.71522e+07	3.66997e+06	34.0196	463.681	137.707	9.88708	92.4771	73.7368	36.6163	93.4908	77.1018	22.8982	3.36716
424.733	I74	1.47841e+06	1.79681e+07	5.77505e+06	2.56558e+06	2.01728e+07	7.75316e+07	3.48696e+06	32.1852	464.502	137.76	9.83789	92.6265	73.7368	34.6202	93.8418	77.1262	22.8738	3.37182
430.45	I75	1446548	1.80551e+07	5.80453e+06	2586893	2.01327e+07	7.74197e+07	3.34616e+06	31.5371	467.426	138.664	9.93397	92.5757	73.7368	33.2703	93.9658	77.1216	22.8784	3.37093
436.167	I76	1.3298e+06	18207579	5.86086e+06	2.58741e+06	2.02757e+07	7.76494e+07	3.21816e+06	28.9062	469.979	139.595	9.90656	92.9579	73.7368	31.9029	94.4692	77.0996	22.9004	3.36673
441.867	I77	1.3036e+06	1.81963e+07	5.85459e+06	2.58321e+06	2.02143e+07	7.76079e+07	3.06394e+06	28.3517	469.938	139.52	9.89577	92.7257	73.7368	30.3903	94.5753	77.1075	22.8925	3.36824
447.6	I78	1.24673e+06	18261162	5.88054e+06	2.58467e+06	2.01703e+07	77410157	2.94879e+06	27.184	472.819	140.497	9.92667	92.7601	73.7368	29.3228	94.7987	77.0923	22.9077	3.36534
453.317	I79	1.17858e+06	1.84841e+07	5938056	2.59534e+06	2.03438e+07	7.77935e+07	2.78552e+06	25.5714	476.233	141.172	9.91852	93.0974	73.7368	27.5628	95.1072	77.1347	22.8653	3.37343
459.033	I80	1105101	1.8421e+07	5.93354e+06	2584740	20311099	7.78376e+07	2.64365e+06	23.9637	474.339	140.984	9.87241	92.8948	73.7368	26.1442	95.4149	77.0877	22.9123	3.36448
464.767	I81	1.05808e+06	1.859e+07	5.96232e+06	2.61031e+06	20368740	7.78813e+07	2.5164e+06	22.9312	478.422	141.589	9.96449	93.1062	73.7368	24.8718	95.6124	77.1635	22.8365	3.37896
470.5	I82	1.001e+06	1.84866e+07	5.95066e+06	2.58068e+06	2.03516e+07	7.79659e+07	2.40167e+06	21.6705	475.244	141.158	9.84071	92.927	73.7368	23.7121	95.8536	77.0996	22.9004	3.36674
476.217	I83	945148	1.86335e+07	6.00534e+06	2.5667e+06	2.03658e+07	7.79178e+07	2.30962e+06	20.4741	479.316	142.544	9.79341	93.0491	73.7368	22.8174	96.0825	77.0778	22.9222	3.36259
481.933	I84	903140	1.86493e+07	6.01611e+06	2.57457e+06	2.02846e+07	7.77401e+07	2.21921e+06	19.6088	480.818	143.126	9.8459	92.8901	73.7368	21.9743	96.2481	77.0611	22.9389	3.35941
487.633	I85	882268	1.8696e+07	6.00127e+06	2.56873e+06	2.02932e+07	7.77486e+07	2.11022e+06	19.1535	481.97	142.757	9.82249	92.9194	73.7368	20.8927	96.3352	77.1489	22.8511	3.37615
493.333	I86	795253	1.86559e+07	5992090	2.58044e+06	2.03028e+07	7.77244e+07	1.99994e+06	17.2699	481.088	142.583	9.87037	92.992	73.7368	19.8071	96.6956	77.1381	22.8619	3.37409
499.067	I87	764714	1.88876e+07	6.05637e+06	2.57079e+06	2.03701e+07	7.76827e+07	1.9295e+06	16.6156	487.321	144.19	9.83869	93.3505	73.7368	19.1197	96.8208	77.1675	22.8325	3.37972
504.817	I88	744974	1.90087e+07	6.10953e+06	2.56518e+06	2.04807e+07	7.81144e+07	1.83714e+06	16.0972	487.736	144.652	9.763	93.3387	73.7368	18.1039	96.92	77.1261	22.8739	3.3718
510.55	I89	727957	1.8896e+07	6089338	2.55619e+06	2.03899e+07	7.81117e+07	1730854	15.7301	484.862	144.179	9.72911	92.9282	73.7368	17.0571	96.9903	77.0796	22.9204	3.36293
516.267	I90	657805	1.90524e+07	6.12926e+06	2.56773e+06	2.04622e+07	7.81766e+07	1.65812e+06	14.2024	488.471	145.003	9.76491	93.1802	73.7368	16.3268	97.2826	77.1098	22.8902	3.36869
521.983	I91	622472	1.90076e+07	6.09722e+06	2.55126e+06	2.04092e+07	7.81588e+07	1.54802e+06	13.4426	487.431	144.278	9.70448	92.9597	73.7368	15.2461	97.4279	77.1607	22.8393	3.37841
527.7	I92	580047	1.89875e+07	6.1148e+06	2.54704e+06	2.04383e+07	7.81856e+07	1.51805e+06	12.5221	486.75	144.645	9.68513	93.0606	73.7368	14.9458	97.6041	77.0912	22.9088	3.36514
533.417	I93	567873	1.93154e+07	6204207	2.54521e+06	2.06086e+07	7.85645e+07	1.45566e+06	12.2002	492.767	146.052	9.63149	93.3835	73.7368	14.2625	97.6657	77.1372	22.8628	3.37392
539.167	I94	531333	19084009	6.13777e+06	2566730	2.03979e+07	7.80276e+07	1.37663e+06	11.4937	490.214	145.482	9.77975	93.0645	73.7368	13.5809	97.8008	77.1145	22.8855	3.36959
544.9	I95	508855	19396822	6.23883e+06	2.54878e+06	2.05509e+07	7.81794e+07	1.3103e+06	10.9861	497.281	147.59	9.6925	93.5808	73.7368	12.9015	97.898	77.1132	22.8868	3.36934
550.617	I96	471842	1.90981e+07	6.15129e+06	2.54472e+06	2.03998e+07	7.79841e+07	1.24977e+06	10.2125	490.849	145.884	9.70129	93.125	73.7368	12.3363	98.046	77.0887	22.9113	3.36466
556.383	I97	451735	1.94699e+07	6.27399e+06	2.55068e+06	2.05874e+07	7.84317e+07	1.1967e+06	9.72149	497.55	147.944	9.66853	93.4453	73.7368	11.745	98.1399	77.0805	22.9195	3.36309
562.1	I98	458603	19321618	6.19962e+06	2555771	2.0549e+07	7.84886e+07	1.12846e+06	9.86213	493.402	146.085	9.6808	93.2032	73.7368	11.0673	98.113	77.1559	22.8441	3.37751
567.833	I99	392336	1.9311e+07	6.2262e+06	2.5277e+06	2.0543e+07	78270359	1105171	8.46061	494.507	147.12	9.60118	93.4359	73.7368	10.8691	98.3812	77.0708	22.9292	3.36124
573.567	I100	382884	1.9427e+07	6.26797e+06	2.54943e+06	2.05164e+07	78131967	1.05467e+06	8.2714	498.359	148.37	9.70087	93.4802	73.7368	10.3908	98.4174	77.0584	22.9416	3.3589
579.3	I101	379357	1.9478e+07	6.26742e+06	2.5247e+06	2.05874e+07	78383515	1.0079e+06	8.16891	498.063	147.88	9.57593	93.5026	73.7368	9.89813	98.437	77.1063	22.8937	3.36801
585.017	I102	348444	19477428	6.26872e+06	2.51941e+06	2.06227e+07	7.87375e+07	943216	7.4695	495.809	147.246	9.51293	93.2422	73.7368	9.22126	98.5708	77.1021	22.8979	3.36721
590.75	I103	353649	1.96149e+07	6300833	2.52907e+06	2.07149e+07	78945494	915915	7.56112	497.993	147.611	9.52422	93.4121	73.7368	8.93076	98.5533	77.136	22.864	3.37369
596.467	I104	339181	1.95369e+07	6.26849e+06	2523032	2.067e+07	7.88121e+07	866017	7.26406	496.852	147.102	9.51757	93.3674	73.7368	8.45852	98.6101	77.1565	22.8435	3.37761
602.2	I105	301677	1.94543e+07	6.25556e+06	2.51217e+06	2.06178e+07	7.85756e+07	828269	6.48029	496.24	147.24	9.5051	93.4118	73.7368	8.11417	98.7601	77.1182	22.8818	3.37029
607.95	I106	304510	1.95359e+07	6286264	2.49268e+06	20506155	7.82231e+07	794328	6.57064	500.567	148.629	9.47386	93.3247	73.7368	7.81673	98.7428	77.1056	22.8944	3.36789
613.683	I107	283457	1.96831e+07	6.34742e+06	2.66543e+06	2.07115e+07	7.87348e+07	779910	6.0766	501.061	149.1	10.0646	93.6465	73.7368	7.62497	98.8373	77.0672	22.9328	3.36057
619.433	I108	271337	1.98016e+07	6.37794e+06	2.54733e+06	2.07159e+07	7.85738e+07	734545	5.82871	505.111	150.124	9.63837	93.8586	73.7368	7.19617	98.8847	77.0886	22.9114	3.36463
625.167	I109	246683	1.95637e+07	6.29679e+06	2.52317e+06	20546132	7.83669e+07	701446	5.31309	500.359	148.605	9.57216	93.3351	73.7368	6.89005	98.9834	77.1012	22.8988	3.36704
630.9	I110	244404	19564211	6.3016e+06	2.51425e+06	20627949	7.85063e+07	680758	5.25465	499.485	148.454	9.52137	93.5404	73.7368	6.67497	98.9946	77.0882	22.9118	3.36457
636.667	I111	224124	1.99332e+07	6.40583e+06	2.5106e+06	2.07754e+07	78977886	656623	4.78986	505.866	150.009	9.45077	93.6466	73.7368	6.39987	99.0835	77.1285	22.8715	3.37224
642.417	I112	208756	1.99554e+07	6.40849e+06	2.49948e+06	2.08417e+07	7.89556e+07	617037	4.46268	506.573	150.113	9.41159	93.9719	73.7368	6.01574	99.1461	77.1408	22.8592	3.3746
648.167	I113	206719	1.98141e+07	6.36413e+06	2.50647e+06	2.07671e+07	7.90273e+07	595391	4.41514	502.53	148.939	9.42935	93.5503	73.7368	5.79944	99.1552	77.138	22.862	3.37407
653.9	I114	210017	19620984	6.30293e+06	2.49902e+06	2.0675e+07	7.86668e+07	557545	4.50612	499.912	148.183	9.4444	93.5624	73.7368	5.45568	99.1378	77.1356	22.8644	3.37362
659.633	I115	190464	1.9724e+07	6.35357e+06	2.49596e+06	2.06526e+07	7.84625e+07	550422	4.09725	503.845	149.762	9.45739	93.7046	73.7368	5.40001	99.216	77.0868	22.9132	3.3643
665.367	I116	158434	1.97614e+07	6.36126e+06	2.49183e+06	2.0704e+07	7.88056e+07	525166	3.39337	502.603	149.291	9.40064	93.5285	73.7368	5.1298	99.3507	77.0989	22.9011	3.3666
671.1	I117	158894	1.98268e+07	6.37382e+06	2.52145e+06	20736433	7.86532e+07	513917	3.40982	505.244	149.875	9.53081	93.8567	73.7368	5.02964	99.3476	77.1224	22.8776	3.3711
676.867	I118	164482	2.0132e+07	6.46439e+06	2.48974e+06	2.09035e+07	7.91288e+07	479448	3.50852	509.937	151.091	9.35439	94.044	73.7368	4.6641	99.3287	77.143	22.857	3.37502
682.617	I119	120930	1.983e+07	6.36966e+06	2.49281e+06	2.07243e+07	78678860	467424	2.59428	505.161	149.729	9.41947	93.771	73.7368	4.57313	99.5036	77.1368	22.8632	3.37384
688.35	I120	138690	1.9872e+07	6.39969e+06	2.48001e+06	2.08182e+07	7.90252e+07	442767	2.96225	504.01	149.775	9.33003	93.7834	73.7368	4.31291	99.4332	77.0911	22.9089	3.36511
694.067	I121	152208	1.99251e+07	6413220	2.47732e+06	2.08142e+07	7.91244e+07	426664	3.2469	504.723	149.904	9.30822	93.6477	73.7368	4.15084	99.3787	77.1009	22.8991	3.36699
699.767	I122	127466	1.99967e+07	6.45024e+06	2.49427e+06	2.08986e+07	7.92602e+07	418938	2.71443	505.671	150.511	9.35587	93.8665	73.7368	4.06869	99.4806	77.0627	22.9373	3.3597
705.533	I123	99411.1	2.02517e+07	6.51961e+06	2.45939e+06	2.10104e+07	79291014	406215	2.11618	511.92	152.07	9.22145	94.3317	73.7368	3.9436	99.5951	77.0975	22.9025	3.36634
711.267	I124	97284	2.0036e+07	6.4737e+06	2.44437e+06	2.09038e+07	79354278	368484	2.06924	506.063	150.879	9.15782	93.7784	73.7368	3.57445	99.6041	77.0331	22.9669	3.3541
716.983	I125	102976	2.03084e+07	6.5297e+06	2.60677e+06	2.10933e+07	7.97693e+07	364751	2.17892	510.274	151.392	9.71546	94.1362	73.7368	3.51983	99.5831	77.1195	22.8805	3.37054
722.717	I126	87190.1	2.02807e+07	6.52884e+06	2476969	2.09982e+07	7.95427e+07	357357	1.85015	511.029	151.804	9.25798	93.9789	73.7368	3.4583	99.646	77.0977	22.9023	3.36638
728.467	I127	89908.5	2.08628e+07	6.72313e+06	2.60463e+06	21437912	8.03174e+07	351903	1.88943	520.628	154.813	9.64124	95.0212	73.7368	3.37267	99.6385	77.0797	22.9203	3.36294
734.2	I128	91005	2.0363e+07	6.55778e+06	2.51339e+06	2.11262e+07	8.00105e+07	325552	1.91981	510.105	151.585	9.33918	93.9985	73.7368	3.13209	99.6327	77.0912	22.9088	3.36514
739.933	I129	81699.6	2.04076e+07	6.57945e+06	2.47761e+06	2.11389e+07	7.94712e+07	306770	1.7352	514.69	153.118	9.26871	94.6934	73.7368	2.97141	99.668	77.0716	22.9284	3.3614
745.7	I130	73931.9	2.11867e+07	6.83791e+06	2.54504e+06	2.15626e+07	8.03513e+07	312886	1.55303	528.486	157.39	9.41665	95.5334	73.7368	2.99746	99.7028	77.0527	22.9473	3.35781
751.45	I131	53702.4	2.05111e+07	6611419	2.45808e+06	2.11498e+07	7.95156e+07	306637	1.13994	517.013	153.776	9.19052	94.6894	73.7368	2.96847	99.7819	77.0753	22.9247	3.36211
757.183	I132	77337.5	2.06995e+07	6.67204e+06	2.61719e+06	2.13021e+07	8.03564e+07	289601	1.62447	516.301	153.562	9.68302	94.3735	73.7368	2.77421	99.6892	77.0756	22.9244	3.36216
762.933	I133	67699.5	2.05889e+07	6633037	2.48386e+06	2.12506e+07	7.99368e+07	284092	1.42949	516.239	153.466	9.23797	94.6396	73.7368	2.73573	99.7265	77.0845	22.9155	3.36386
768.633	I134	50898	21366057	6.90009e+06	2.4665e+06	2.18316e+07	8.0998e+07	282402	1.06064	528.706	157.553	9.05321	95.9532	73.7368	2.68382	99.7971	77.0417	22.9583	3.35573
774.383	I135	56607.6	2.12591e+07	6.87163e+06	2.52529e+06	2.16039e+07	8.05331e+07	285795	1.18643	529.096	157.809	9.32251	95.5004	73.7368	2.73175	99.773	77.0261	22.9739	3.35276
780.133	I136	55322.9	2.09981e+07	6753775	2.46028e+06	21348975	8.00114e+07	259944	1.16706	526.008	156.114	9.14174	94.9888	73.7368	2.50086	99.7767	77.1135	22.8865	3.36939
785.867	I137	46890.2	2.17094e+07	7.01812e+06	2.57913e+06	2.19265e+07	8.1299e+07	263865	0.973505	535.214	159.655	9.43158	96.0135	73.7368	2.49837	99.8137	77.0237	22.9763	3.35232
791.617	I138	52813.2	2.08575e+07	6.72327e+06	2.47032e+06	2.13982e+07	8.04198e+07	228929	1.10846	519.833	154.62	9.13244	94.7244	73.7368	2.19128	99.7879	77.0748	22.9252	3.36201
797.35	I139	46222	2.12566e+07	6.86974e+06	2.54464e+06	2.17476e+07	81206775	229233	0.960721	524.645	156.457	9.31601	95.338	73.7368	2.17293	99.8162	77.0289	22.9711	3.35329
803.067	I140	45808.1	2.12948e+07	6879711	2.51513e+06	2.177e+07	8.09552e+07	226298	0.955077	527.222	157.171	9.2366	95.7329	73.7368	2.15177	99.8173	77.035	22.965	3.35445
808.783	I141	34755.5	2.10646e+07	6799281	2424900	2.15793e+07	8.10017e+07	222984	0.724219	521.223	155.244	8.90011	94.8396	73.7368	2.11904	99.8614	77.0507	22.9493	3.35744
814.517	I142	41406.5	2.19622e+07	7.11394e+06	2.55353e+06	2.21198e+07	8.20546e+07	230404	0.851739	536.459	160.344	9.25196	95.968	73.7368	2.16146	99.837	76.9886	23.0114	3.34567
820.25	I143	38916.1	2.06528e+07	6.66531e+06	2.45716e+06	2.13161e+07	8.02749e+07	204575	0.818258	515.66	153.563	9.10019	94.5314	73.7368	1.9617	99.8434	77.0535	22.9465	3.35796
825.983	I144	28830	2.09949e+07	6750427	2.57675e+06	2.1539e+07	8.06414e+07	198974	0.603431	521.82	154.818	9.49972	95.0857	73.7368	1.89933	99.8845	77.1196	22.8804	3.37055
831.733	I145	1376.12	2.11817e+07	6.84499e+06	2.44356e+06	2.14559e+07	80565206	195290	0.0288304	526.959	157.135	9.01719	94.8086	73.7368	1.86592	99.9945	77.0302	22.9698	3.35355
837.467	I146	8801.38	2.17289e+07	6.99615e+06	2579545	2.1897e+07	8.13832e+07	181188	0.182539	535.139	158.99	9.42333	95.7852	73.7368	1.71379	99.9651	77.095	22.905	3.36586
843.2	I147	20027.6	2.14788e+07	6.93903e+06	2.51432e+06	2.18101e+07	8.10747e+07	196939	0.416951	530.993	158.292	9.21999	95.7677	73.7368	1.86985	99.9202	77.0353	22.9647	3.3545
848.933	I148	8562.5	2.11294e+07	6.81548e+06	2.45503e+06	21680187	80920688	189879	0.1786	523.349	155.77	9.01971	95.3786	73.7368	1.80625	99.9658	77.063	22.937	3.35976
854.683	I149	18301.4	2.1948e+07	7.11413e+06	2.54333e+06	2.21982e+07	8.21352e+07	177186	0.376093	535.588	160.191	9.20595	96.2134	73.7368	1.66058	99.928	76.9767	23.0233	3.34343
860.4	I150	14749.5	2.12369e+07	6.85575e+06	2.44572e+06	2.16821e+07	8.1355e+07	169856	0.306009	523.204	155.854	8.93755	94.878	73.7368	1.60716	99.9414	77.0485	22.9515	3.35702
866.117	I151	17144.8	2.13519e+07	6.88893e+06	2598449	2.18609e+07	8.14353e+07	179880	0.355352	525.518	156.454	9.48631	95.566	73.7368	1.70032	99.932	77.0586	22.9414	3.35894
871.883	I152	5992.12	20714733	6673599	2.45209e+06	2.13537e+07	8.02982e+07	156940	0.125955	517.056	153.71	9.07877	94.6707	73.7368	1.50448	99.9759	77.0845	22.9155	3.36385
877.633	I153	4917.38	21478049	6.9536e+06	2.51268e+06	2.18689e+07	8.17212e+07	160619	0.101564	526.774	157.37	9.14108	95.2665	73.7368	1.51294	99.9806	76.9976	23.0024	3.34736
883.35	I154	-2483.38	2.11315e+07	6.86238e+06	2.47542e+06	2.17014e+07	8.1535e+07	154089	-0.0514089	519.458	155.66	9.02609	94.7524	73.7368	1.45475	100.01	76.9433	23.0567	3.33713
889.067	I155	18625.5	2.10164e+07	6.79862e+06	2.43964e+06	2.16279e+07	8.11193e+07	146097	0.387547	519.275	155.004	8.94123	94.9157	73.7368	1.38636	99.9258	77.0119	22.9881	3.35008
894.75	I156	-2661.12	2.15796e+07	6.96949e+06	2.53362e+06	21972275	8.18801e+07	144378	-0.0548564	528.238	157.423	9.19938	95.531	73.7368	1.35732	100.01	77.0407	22.9593	3.35553
900.467	I157	3224	2.1284e+07	6.87941e+06	2.42245e+06	2.17355e+07	81209860	154048	0.067008	525.302	156.671	8.86835	95.2816	73.7368	1.46018	99.9872	77.0268	22.9732	3.35289
906.183	I158	12370.8	2.15478e+07	6.96538e+06	2.57306e+06	2.19918e+07	8.18946e+07	139946	0.254965	527.365	157.303	9.34095	95.5987	73.7368	1.31542	99.9512	77.025	22.975	3.35255
911.917	I159	13652.5	2.12066e+07	6.83712e+06	2.43816e+06	2.17273e+07	81520263	152118	0.282675	521.399	155.115	8.89185	94.883	73.7368	1.4364	99.9459	77.0714	22.9286	3.36136
917.683	I160	17842.1	2.18995e+07	7.09099e+06	2.49755e+06	2.21613e+07	8.19389e+07	152114	0.367534	535.683	160.053	9.0619	96.2839	73.7368	1.42903	99.9297	76.9952	23.0048	3.34692
923.417	I161	2050.88	2.05517e+07	6.62009e+06	2.45301e+06	2.12881e+07	8.03521e+07	137757	0.0430807	512.644	152.375	9.07606	94.3163	73.7368	1.3197	99.9918	77.0871	22.9129	3.36436
929.15	I162	18459.6	2.134e+07	6.88546e+06	2.42315e+06	2.17861e+07	8.15954e+07	148486	0.381854	524.195	156.068	8.82897	95.0519	73.7368	1.40081	99.9269	77.0577	22.9423	3.35876
934.9	I163	-1159.75	2.1377e+07	6.92956e+06	2519542	2.18942e+07	8.19521e+07	136347	-0.0238861	522.818	156.384	9.14024	95.108	73.7368	1.2807	100.005	76.9753	23.0247	3.34317
940.633	I164	352.5	2.11127e+07	6.82542e+06	2.4204e+06	2.16179e+07	8.13437e+07	143175	0.00731435	520.216	155.186	8.84625	94.6101	73.7368	1.35489	99.9986	77.0232	22.9768	3.35221
946.383	I165	20361.1	2.18848e+07	7.07333e+06	2.58656e+06	2.21304e+07	8.22605e+07	137852	0.417783	533.231	159.03	9.34819	95.7734	73.7368	1.28997	99.9201	77.0274	22.9726	3.35302
952.133	I166	32014.5	21344396	6.88918e+06	2.41704e+06	2.17502e+07	8.15378e+07	134501
957.867	I167	-8065	2.15663e+07	6.99072e+06	2.54417e+06	2.18831e+07	8.1906e+07	125473
963.617	I168	-3705.62	2.09547e+07	6.76008e+06	2440556	2.14888e+07	80781372	119727
970.967	I169	6630	2.5707e+07	8.42764e+06	2610672	2.41106e+07	8.6998e+07	146719
976.65	I170	14373.8	3.14426e+07	12398821	2.7762e+06	2.79323e+07	9.33129e+07	179910

## Sheet: Hydride
time [min]:	Peak name	A/B	C	Riv 1	Riv 2	[A/B]	[C]	Sum Hyds	%			1	2
0	I0	0	116823	0	2307.1	0	0.0221056	0.0221056	0.955179	RG Calibration				Flow Calibration
0.0166667	I1	4611.71	17369.7	91.0749	343.027	0.00087264	0.00328674	0.00415938	0.179726		Hyd 1	Hyd 2			Hyd1	Hyd 2	1-hexene
5.86667	I2	15156.2	22255.3	299.314	439.511	0.0028679	0.00421121	0.00707911	0.305887	CF	0.9894	0.9894		0 mL/min	4.56654e+06	4.56654e+06	0
11.5833	I3	433845	22190.9	8567.85	438.24	0.0820935	0.00419903	0.0862925	3.72868	RG Hyd	203	203		4 mL/min	4.44376e+06	4.44376e+06	0
17.35	I4	988340	16623	19518.4	328.28	0.187017	0.00314544	0.190162	8.21686	RG 1H	3.56	3.56		CF	1.13818	1.13818	#DIV/0!
23.1	I5	1.41933e+06	5210.94	28029.8	102.909	0.26857	0.000986028	0.269556	11.6474	Int TMB	69261176	69261176
28.8333	I6	1.80717e+06	34889.6	35689.1	689.021	0.341957	0.0066019	0.348559	15.0612	[TMB]	73.7368	73.7368
34.5833	I7	2.11e+06	63660.6	41669.5	1257.21	0.39926	0.012046	0.411306	17.7724
40.3	I8	2.34848e+06	23285.8	46379.2	459.863	0.444385	0.00440621	0.448792	19.3922	IRF	57.6334	57.6334
46.0667	I9	2.55548e+06	56046.6	50467.2	1106.84	0.483555	0.0106053	0.49416	21.3526
51.8167	I10	2.71479e+06	41769.3	53613.3	824.887	0.5137	0.00790371	0.521604	22.5384
57.55	I11	2.84832e+06	10911.2	56250.4	215.481	0.538967	0.00206465	0.541032	23.3779
63.2667	I12	3.00959e+06	89854.9	59435.3	1774.51	0.569484	0.0170026	0.586486	25.3419
69	I13	3.12953e+06	23404.4	61803.9	462.205	0.592179	0.00442865	0.596607	25.7793
74.75	I14	3.25228e+06	77612.7	64228	1532.74	0.615405	0.0146861	0.630091	27.2261
80.5167	I15	3.28379e+06	87449.6	64850.3	1727.01	0.621368	0.0165474	0.637916	27.5642
86.2667	I16	3.34906e+06	72408.2	66139.3	1429.96	0.633718	0.0137013	0.64742	27.9749
92.05	I17	3.47976e+06	114077	68720.5	2252.86	0.65845	0.0215859	0.680036	29.3842
97.8	I18	3.51372e+06	98680.8	69391	1948.81	0.664875	0.0186726	0.683548	29.5359
103.55	I19	3.52349e+06	83032.2	69584.1	1639.77	0.666725	0.0157116	0.682437	29.4879
109.3	I20	3.57716e+06	91535.7	70644	1807.7	0.676881	0.0173206	0.694201	29.9963
115.05	I21	3.6981e+06	75218.5	73032.3	1485.46	0.699764	0.0142331	0.713997	30.8517
120.783	I22	3.71716e+06	42590.3	73408.9	841.1	0.703372	0.00805906	0.711431	30.7408
126.517	I23	3.72552e+06	82246.3	73574	1624.25	0.704954	0.0155629	0.720517	31.1334
132.267	I24	3.79944e+06	96619.3	75033.8	1908.1	0.718942	0.0182826	0.737224	31.8553
138.033	I25	3.76773e+06	-1628.82	74407.5	-32.167	0.712941	-0.00030821	0.712633	30.7927
143.767	I26	3.86692e+06	22635	76366.3	447.01	0.731709	0.00428306	0.735992	31.8021
149.517	I27	3.86568e+06	50420.4	76341.8	995.733	0.731474	0.00954068	0.741015	32.0191
155.25	I28	3.99367e+06	52252.5	78869.4	1031.91	0.755693	0.00988736	0.76558	33.0805
160.983	I29	3.97995e+06	80506	78598.5	1589.88	0.753097	0.0152336	0.76833	33.1994
166.75	I30	4.02273e+06	56310.2	79443.3	1112.05	0.761192	0.0106552	0.771847	33.3513
172.483	I31	4.04074e+06	67161.3	79799.1	1326.34	0.764601	0.0127084	0.777309	33.5874
178.217	I32	4.08979e+06	95386.6	80767.8	1883.75	0.773882	0.0180493	0.791931	34.2192
183.95	I33	4.12301e+06	87828.4	81423.8	1734.49	0.780167	0.0166191	0.796787	34.429
189.683	I34	4.15207e+06	79356.7	81997.6	1567.19	0.785666	0.0150161	0.800682	34.5973
195.383	I35	4.23537e+06	113417	83642.6	2239.82	0.801428	0.021461	0.822889	35.5569
201.117	I36	4.24861e+06	59447.3	83904.1	1174	0.803933	0.0112488	0.815182	35.2238
206.833	I37	4.29157e+06	48659.9	84752.7	960.966	0.812064	0.00920756	0.821271	35.4869
212.567	I38	4.34667e+06	103426	85840.8	2042.52	0.82249	0.0195705	0.84206	36.3852
218.317	I39	4.28985e+06	90660.9	84718.6	1790.43	0.811737	0.0171551	0.828892	35.8163
224.1	I40	4.39627e+06	19321.6	86820.3	381.575	0.831875	0.00365609	0.835531	36.1031
229.817	I41	4.39241e+06	65603.1	86744	1295.57	0.831144	0.0124136	0.843558	36.4499			Rh concentration
235.55	I42	4.42013e+06	100057	87291.4	1975.99	0.836389	0.018933	0.855322	36.9583			actual weight (g)	0.0126
241.3	I43	4.44967e+06	102975	87874.9	2033.62	0.841979	0.0194853	0.861464	37.2237			MW RhHCO(PPh3)3 (g/mol)	918.78
247.017	I44	4.49068e+06	89600.5	88684.6	1769.49	0.849738	0.0169544	0.866693	37.4496			MW Rh(acac)(CO)2 (g/mol)	258.03
252.733	I45	4.55322e+06	68352.2	89919.7	1349.86	0.861572	0.0129338	0.874506	37.7872			Number of mol (n)	4.88315e-05
258.433	I46	4.60962e+06	93583.7	91033.7	1848.15	0.872246	0.0177082	0.889954	38.4547			actual volume of reaction (L)	0.0211
264.133	I47	4.60185e+06	82600.3	90880.3	1631.24	0.870776	0.0156299	0.886406	38.3014			[Rh] (M)	0.00231429
269.9	I48	4.66789e+06	94102.8	92184.4	1858.4	0.883271	0.0178064	0.901077	38.9354			[Rh] (mM)	2.31429
275.617	I49	4.70747e+06	96343	92966	1902.64	0.89076	0.0182303	0.90899	39.2773
281.367	I50	4.72796e+06	78509.7	93370.8	1550.46	0.894639	0.0148558	0.909495	39.2991
287.117	I51	4.74107e+06	108161	93629.5	2136.04	0.897118	0.0204666	0.917585	39.6486
292.833	I52	4.67031e+06	78376.2	92232.3	1547.82	0.88373	0.0148306	0.898561	38.8266
298.567	I53	4.81186e+06	84032.9	95027.5	1659.53	0.910513	0.0159009	0.926414	40.0302
304.3	I54	4.76783e+06	73261	94158	1446.8	0.902181	0.0138627	0.916044	39.5821
310.067	I55	4.8049e+06	74345.6	94890	1468.22	0.909196	0.0140679	0.923264	39.894
315.817	I56	4.86276e+06	102743	96032.8	2029.02	0.920145	0.0194412	0.939586	40.5993			43.2208
321.567	I57	4.91208e+06	129310	97006.9	2553.7	0.929478	0.0244685	0.953947	41.2198
327.283	I58	4.93491e+06	82238.5	97457.6	1624.1	0.933797	0.0155614	0.949359	41.0216
333.05	I59	4.92488e+06	65515.4	97259.5	1293.84	0.931899	0.012397	0.944296	40.8028
338.767	I60	4.93807e+06	102942	97520.2	2032.96	0.934396	0.0194789	0.953875	41.2167
344.517	I61	4.95412e+06	64762.1	97837.1	1278.96	0.937433	0.0122545	0.949687	41.0358
350.217	I62	4.9407e+06	100932	97571.9	1993.27	0.934892	0.0190987	0.953991	41.2217
355.933	I63	4.99418e+06	126600	98628.2	2500.17	0.945013	0.0239556	0.968969	41.8689
361.65	I64	4.96574e+06	88001.6	98066.6	1737.91	0.939632	0.0166519	0.956284	41.3208
367.35	I65	4.99358e+06	60697.3	98616.4	1198.69	0.9449	0.0114853	0.956385	41.3252
373.117	I66	5.068e+06	101283	100086	2000.2	0.958981	0.0191651	0.978146	42.2655
378.85	I67	4.97768e+06	148437	98302.3	2931.43	0.94189	0.0280877	0.969978	41.9125
384.633	I68	5.08541e+06	147255	100430	2908.07	0.962276	0.0278639	0.99014	42.7837
390.35	I69	5.06649e+06	90040.1	100056	1778.17	0.958696	0.0170376	0.975734	42.1612
396.083	I70	5.0251e+06	68431.4	99238.8	1351.43	0.950864	0.0129488	0.963813	41.6461
401.85	I71	5.11568e+06	89679.5	101028	1771.05	0.968003	0.0169694	0.984973	42.5605
407.583	I72	5.0788e+06	82737.9	100299	1633.96	0.961025	0.0156559	0.976681	42.2022
413.283	I73	5.07187e+06	78144.6	100162	1543.25	0.959713	0.0147867	0.974499	42.1079
419	I74	5.0643e+06	82181.6	100013	1622.97	0.958282	0.0155506	0.973832	42.0791
424.717	I75	5.12442e+06	87091.8	101200	1719.94	0.969657	0.0164798	0.986137	42.6107
430.433	I76	5.17098e+06	90204	102120	1781.4	0.978468	0.0170687	0.995536	43.0169
436.15	I77	5.1641e+06	48043.2	101984	948.787	0.977166	0.00909087	0.986257	42.616
441.867	I78	5.17562e+06	102266	102211	2019.62	0.979346	0.0193511	0.998697	43.1535
453.3	I79	5.2113e+06	89695.8	102916	1771.37	0.986097	0.0169725	1.00307	43.3424
459.017	I80	5.25099e+06	75221.8	103700	1485.53	0.993607	0.0142337	1.00784	43.5486
464.767	I81	5.21063e+06	88282.8	102903	1743.46	0.985971	0.0167051	1.00268	43.3254
470.5	I82	5.22558e+06	96820.6	103198	1912.07	0.988799	0.0183207	1.00712	43.5174
476.2	I83	5.22725e+06	91336.6	103231	1803.77	0.989115	0.017283	1.0064	43.4863
481.933	I84	5.23141e+06	100251	103313	1979.83	0.989902	0.0189698	1.00887	43.5931
487.633	I85	5.21891e+06	67204.3	103066	1327.19	0.987538	0.0127166	1.00025	43.2208
493.333	I86	5.23848e+06	62507.3	103453	1234.43	0.991239	0.0118278	1.00307	43.3423
499.067	I87	5.1941e+06	97806	102576	1931.53	0.982842	0.0185071	1.00135	43.2681
504.817	I88	5.20902e+06	88112	102871	1740.09	0.985666	0.0166728	1.00234	43.3108
510.55	I89	5.17372e+06	63414.3	102174	1252.35	0.978986	0.0119994	0.990985	42.8202
516.267	I90	5.24299e+06	89375.1	103542	1765.03	0.992093	0.0169118	1.00901	43.5989
521.983	I91	5.26594e+06	114596	103995	2263.11	0.996435	0.0216842	1.01812	43.9927
527.7	I92	5.25892e+06	83011.9	103856	1639.37	0.995108	0.0157077	1.01082	43.6771
533.417	I93	5.25761e+06	113879	103831	2248.96	0.99486	0.0215486	1.01641	43.9188
539.15	I94	5.25719e+06	82517.5	103822	1629.61	0.99478	0.0156142	1.01039	43.6589
544.9	I95	5.20621e+06	95157.8	102815	1879.24	0.985133	0.018006	1.00314	43.3454
550.617	I96	5.23688e+06	95114.3	103421	1878.38	0.990936	0.0179978	1.00893	43.5958
556.383	I97	5.27751e+06	79231.2	104224	1564.71	0.998626	0.0149923	1.01362	43.7982
562.117	I98	5.28364e+06	136221	104345	2690.17	0.999786	0.0257761	1.02556	44.3143
567.817	I99	5.22695e+06	91248.4	103225	1802.03	0.989057	0.0172663	1.00632	43.483
573.567	I100	5.24696e+06	79670.2	103620	1573.38	0.992844	0.0150754	1.00792	43.552
579.3	I101	5.2386e+06	137314	103455	2711.76	0.991262	0.0259829	1.01724	43.9549
585.017	I102	5.2758e+06	92819.1	104190	1833.05	0.998301	0.0175635	1.01586	43.8953
590.75	I103	5.31712e+06	69747.7	105006	1377.42	1.00612	0.0131979	1.01932	44.0445
596.467	I104	5.27836e+06	111578	104240	2203.52	0.998785	0.0211131	1.0199	44.0696
602.2	I105	5266097	97340.9	103998	1922.35	0.996466	0.0184191	1.01488	43.853
607.95	I106	5.2841e+06	105204	104354	2077.64	0.999873	0.019907	1.01978	44.0645
613.683	I107	5.24956e+06	111319	103672	2198.4	0.993336	0.0210641	1.0144	43.832
619.433	I108	5.22098e+06	103948	103107	2052.83	0.987928	0.0196693	1.0076	43.5381
625.167	I109	5.25942e+06	86408.1	103866	1706.44	0.995202	0.0163504	1.01155	43.709
630.9	I110	5.27083e+06	69833.4	104092	1379.11	0.99736	0.0132141	1.01057	43.6667
636.667	I111	5.28523e+06	119552	104376	2360.98	1.00009	0.0226219	1.02271	44.191
642.417	I112	5.27854e+06	99487.7	104244	1964.74	0.99882	0.0188253	1.01765	43.9722
648.167	I113	5.29671e+06	122493	104603	2419.06	1.00226	0.0231784	1.02544	44.3089
653.9	I114	5.24839e+06	81411.8	103648	1607.77	0.993114	0.015405	1.00852	43.5779
659.633	I115	5.25825e+06	128099	103843	2529.78	0.99498	0.0242393	1.01922	44.0402
665.367	I116	5.22562e+06	81933.4	103199	1618.07	0.988806	0.0155037	1.00431	43.396
671.1	I117	5.26453e+06	135244	103967	2670.89	0.996168	0.0255913	1.02176	44.15
676.867	I118	5.25245e+06	99846.9	103729	1971.84	0.993883	0.0188933	1.01278	43.7619
682.617	I119	5.28602e+06	97735.4	104392	1930.14	1.00024	0.0184938	1.01873	44.0191
688.333	I120	5.18179e+06	118654	102333	2343.25	0.980513	0.022452	1.00297	43.3379
694.05	I121	5.24951e+06	82113.5	103671	1621.63	0.993326	0.0155377	1.00886	43.5928
699.767	I122	5.22805e+06	118537	103247	2340.94	0.989266	0.0224299	1.0117	43.7152
705.533	I123	5.2184e+06	58573.2	103056	1156.74	0.98744	0.0110834	0.998523	43.146
711.25	I124	5.23994e+06	131050	103482	2588.05	0.991517	0.0247976	1.01631	43.9147
716.983	I125	5.26825e+06	41153.3	104041	812.72	0.996872	0.00778714	1.00466	43.4111
722.717	I126	5.28894e+06	143210	104449	2828.19	1.00079	0.0270985	1.02789	44.4148
728.467	I127	5.31941e+06	106430	105051	2101.84	1.00655	0.020139	1.02669	44.3632
734.2	I128	5.23447e+06	131424	103374	2595.44	0.990481	0.0248684	1.01535	43.873
739.933	I129	5.28999e+06	81171.9	104470	1603.03	1.00099	0.0153596	1.01635	43.9161
745.683	I130	5.28708e+06	97052.9	104413	1916.66	1.00044	0.0183646	1.0188	44.0221
751.45	I131	5.24406e+06	87628.5	103563	1730.54	0.992296	0.0165813	1.00888	43.5934
757.183	I132	5.31365e+06	58575.5	104937	1156.79	1.00546	0.0110838	1.01655	43.9248
762.917	I133	5.20812e+06	74881.7	102853	1478.81	0.985495	0.0141693	0.999664	43.1953
768.633	I134	5.28078e+06	82751.9	104288	1634.24	0.999244	0.0156585	1.0149	43.8537
774.367	I135	5.2601e+06	61304.6	103880	1210.68	0.995332	0.0116002	1.00693	43.5093
780.133	I136	5.15247e+06	67733.9	101754	1337.65	0.974966	0.0128168	0.987782	42.6819
785.85	I137	5.26674e+06	130066	104011	2568.61	0.996587	0.0246114	1.0212	44.1258
791.6	I138	5.24332e+06	92453.3	103548	1825.83	0.992156	0.0174943	1.00965	43.6268
797.333	I139	5.25256e+06	144498	103731	2853.63	0.993905	0.0273423	1.02125	44.1279
803.05	I140	5.25647e+06	117841	103808	2327.2	0.994644	0.0222982	1.01694	43.9419
808.767	I141	5.26868e+06	120855	104049	2386.72	0.996955	0.0228685	1.01982	44.0664
814.5	I142	5.2216e+06	94377.5	103119	1863.83	0.988046	0.0178584	1.0059	43.4649
820.233	I143	5.26022e+06	122147	103882	2412.23	0.995353	0.0231129	1.01847	44.0077
825.967	I144	5.25672e+06	35145.8	103813	694.081	0.994691	0.00665038	1.00134	43.2678
831.717	I145	5.1807e+06	28588.4	102312	564.581	0.980307	0.00540958	0.985717	42.5926
837.45	I146	5.27712e+06	112898	104216	2229.58	0.998551	0.0213629	1.01991	44.0703
843.2	I147	5.18397e+06	45527.7	102376	899.11	0.980925	0.00861488	0.98954	42.7578
848.917	I148	5.26308e+06	116568	103939	2302.06	0.995894	0.0220573	1.01795	43.9855
854.667	I149	5.24674e+06	150154	103616	2965.33	0.992802	0.0284126	1.02121	44.1265
860.383	I150	5.22483e+06	32468.9	103183	641.215	0.988656	0.00614385	0.9948	42.9851
866.117	I151	5.21685e+06	130609	103026	2579.36	0.987147	0.0247143	1.01186	43.7223
871.883	I152	5.2095e+06	127719	102881	2522.28	0.985757	0.0241674	1.00992	43.6386
877.633	I153	5.25847e+06	102006	103848	2014.47	0.995023	0.0193018	1.01432	43.8288
883.35	I154	5.25118e+06	69698.7	103704	1376.45	0.993643	0.0131886	1.00683	43.505
889.05	I155	5.18102e+06	73744.8	102318	1456.36	0.980367	0.0139542	0.994321	42.9644
894.75	I156	5.2218e+06	110246	103123	2177.21	0.988084	0.0208611	1.00895	43.5963
900.467	I157	5.21572e+06	89702.8	103003	1771.51	0.986934	0.0169738	1.00391	43.3786
906.183	I158	5.19572e+06	92375.6	102608	1824.29	0.983148	0.0174796	1.00063	43.2369
911.917	I159	5.23951e+06	122584	103473	2420.87	0.991434	0.0231957	1.01463	43.8419
917.683	I160	5.22651e+06	81045.8	103216	1600.54	0.988975	0.0153357	1.00431	43.3961
923.417	I161	5.22783e+06	80017.2	103242	1580.23	0.989224	0.0151411	1.00437	43.3984
929.15	I162	5.22215e+06	85601.3	103130	1690.51	0.98815	0.0161977	1.00435	43.3977
934.9	I163	5.24641e+06	106326	103609	2099.79	0.99274	0.0201193	1.01286	43.7654
940.633	I164	5.20058e+06	76791.4	102704	1516.52	0.984069	0.0145307	0.9986	43.1493
946.383	I165	5.20779e+06	85373.2	102847	1686	0.985432	0.0161545	1.00159	43.2783
952.133	I166	5.17085e+06	60968.2	102117	1204.04	0.978443	0.0115366	0.989979	42.7768
957.867	I167	5.19833e+06	69423.6	102660	1371.02	0.983642	0.0131365	0.996779	43.0706
963.617	I168	5.15266e+06	98952	101758	1954.17	0.975002	0.018724	0.993726	42.9387
970.967	I169	5.59012e+06	24844.4	110397	490.643	1.05778	0.00470113	1.06248	45.9095

## Sheet: Phosphorus
time [min]:	Peak name	internal standard #1	OPPh3	PPh3	A/B	Q	[PPh3]	[OPPh3]	[A/B]	[C]	total phosphorus		when phosphorus source is PPH3
0.0166667	I0	1.09078e+08	2.50894e+06	2.51239e+07	-251809	-149099	6.3247	0.29864	-0.00730792	-0.0159622	6.60872
5.73333	I1	1.1006e+08	562647	2.53543e+07	-38708.1	-177641	6.32572	0.0663741	-0.00111335	-0.0188481	6.38987		INTERNAL REFERENCE (CF SPECTRUM)			FLOW CALIBRATION
11.4833	I2	1.08567e+08	1.80779e+06	2.64438e+07	5.77524e+06	309028	6.68829	0.216194	0.168396	0.0332395	7.24128		Triphenylphosphine mass (g)	0.0784			Triphenylphosphosphate	Peak 1	Peak 2	Peak 3
17.2167	I3	1.09099e+08	2.76566e+06	2.67404e+07	7.00902e+06	-241753	6.73034	0.329134	0.203374	-0.0258766	7.46623		Triphenylphosphine n (moles)	0.000298906		0 mL/min	5.70293e+07	7.98011e+07	3.48921e+06	1.26911e+07	2720052
22.9833	I4	1.08091e+08	3.62711e+06	3.11308e+07	1.10413e+07	1.71061e+06	7.90843	0.435677	0.323363	0.184806	8.99083		Reaction Volume (L)	0.0224		4 mL/min	1.74532e+07	1.0222e+07	945257	6.42578e+06	1.02344e+06
28.7167	I5	1.09451e+08	4.33865e+06	3.2651e+07	1.34018e+07	1.70456e+06	8.19153	0.514669	0.387617	0.181864	9.48143		Triphenylphosphine concentration (M)	0.013344		CF	3.26756	7.80679	3.69128	1.8	3.32
34.45	I6	1.1081e+08	6.15977e+06	3.51363e+07	1.70784e+07	2.3761e+06	8.70695	0.721736	0.487896	0.250403	10.4045		Triphenylphosphine concentration (mM)	13.344			internal standard				acyl cpmplex
40.1667	I7	1.10859e+08	6.34965e+06	3.74706e+07	1.77227e+07	4.25351e+06	9.2813	0.743656	0.506079	0.448055	11.0371
45.95	I8	1.11946e+08	6.77262e+06	3.69837e+07	1.83716e+07	3.72769e+06	9.07177	0.785495	0.519517	0.388855	10.8963
51.7	I9	1.11851e+08	6.53041e+06	3.97874e+07	1.99505e+07	3.91418e+06	9.76777	0.758045	0.564643	0.408655	11.6551		[Triphenylphosphate] ACTUAL EXPERIMENT
57.4333	I10	1.12792e+08	7.04144e+06	4.19904e+07	2.07304e+07	3.66171e+06	10.2226	0.810548	0.581822	0.379108	12.1968		Triphenylphosphate mass (g)	0.084
63.1667	I11	1.13636e+08	7.18283e+06	4.24748e+07	2.17453e+07	3.98134e+06	10.2637	0.820682	0.605772	0.409138	12.296		Triphenylphosphate n (moles)	0.000257448
68.8833	I12	1.13382e+08	7.65343e+06	4.33332e+07	2.36173e+07	5.12698e+06	10.4946	0.876407	0.659393	0.528046	12.6898		Reaction Volume (L)	0.0224
74.65	I13	1.1185e+08	9.11633e+06	4.4807e+07	2.33702e+07	5.06668e+06	11.0002	1.05823	0.661436	0.528986	13.3813		Triphenylphosphate concentration (M)	0.0114932
80.4	I14	1.11045e+08	9.9307e+06	4.21823e+07	2.42501e+07	3.35968e+06	10.4309	1.16112	0.691314	0.353309	12.9747		Triphenylphosphate concentration (mM)	11.4932
86.1667	I15	1.13026e+08	8.73896e+06	4.41038e+07	2.52124e+07	3.94188e+06	10.7149	1.00386	0.706145	0.407268	13.131
91.95	I16	1.12687e+08	9.42564e+06	4.30616e+07	2.54654e+07	5.88998e+06	10.4931	1.086	0.71538	0.610373	13.0099
97.6833	I17	1.12468e+08	1.04194e+07	4.48186e+07	2.5709e+07	3.92548e+06	10.9426	1.20285	0.723633	0.407587	13.5927
103.433	I18	1.14662e+08	9.3068e+06	4.23956e+07	2.7074e+07	3.95791e+06	10.153	1.05384	0.747471	0.403091	12.7017
109.183	I19	1.14094e+08	9.82964e+06	4.24451e+07	2.58401e+07	4.68466e+06	10.2154	1.11859	0.716957	0.479481	12.7679
114.95	I20	1.15188e+08	1.05634e+07	4.32863e+07	2.57254e+07	3.29473e+06	10.3189	1.19067	0.706992	0.334016	12.9235
120.683	I21	1.13798e+08	1.08754e+07	4.31691e+07	2.88516e+07	3.1814e+06	10.4167	1.24081	0.802593	0.326467	13.2627		when phosphorus source is RhHCOPPh33
126.417	I22	1.14138e+08	1.09976e+07	4.33018e+07	2.76541e+07	3.33333e+06	10.4175	1.25101	0.766987	0.341037	13.2025
132.183	I23	1.14287e+08	1.10684e+07	4.21985e+07	2.75239e+07	3.93078e+06	10.1389	1.25742	0.762382	0.40164	12.9211		Rh concentration
137.933	I24	1.15392e+08	1.09759e+07	4.41974e+07	2.78001e+07	3.83157e+06	10.5174	1.23497	0.762657	0.387754	13.2777		actual weight (g)	0.0126
143.667	I25	1.16077e+08	1.06367e+07	4.42012e+07	2.71755e+07	4.15653e+06	10.4563	1.18975	0.741127	0.418159	13.1283		MW RhHCO(PPh3)3 (g/mol)	918.78
149.417	I26	1.15568e+08	10488783	4.17359e+07	2.97716e+07	3.47406e+06	9.91657	1.17837	0.815501	0.351039	12.7259		MW Rh(acac)(CO)2 (g/mol)	258.03
155.15	I27	1.14792e+08	1.03767e+07	4.24454e+07	2.96832e+07	3.09573e+06	10.1534	1.17366	0.818578	0.314926	12.9642		Number of mol (n)	4.88315e-05
160.883	I28	1.14662e+08	1.16857e+07	4.2589e+07	2.90454e+07	2.33715e+06	10.1993	1.32321	0.801898	0.238025	13.1263		actual volume of reaction (L)	0.0211
166.633	I29	1.14505e+08	1.10688e+07	4.25618e+07	3.01257e+07	4.72928e+06	10.2067	1.25508	0.832861	0.48231	13.1275		[Rh] (M)	0.00231429
172.383	I30	1.13011e+08	1.16154e+07	4.3616e+07	3.04135e+07	2.71294e+06	10.5978	1.33447	0.851937	0.280334	13.6362		[Rh] (mM)	2.31429		[PPh3]	6.94287
178.083	I31	1.13195e+08	1.01463e+07	4.22109e+07	2.92364e+07	3.58735e+06	10.2397	1.16379	0.817631	0.370086	13.0388
183.833	I32	1.13963e+08	11154409	4.37989e+07	3.05303e+07	3.8329e+06	10.5533	1.2708	0.848063	0.392753	13.5202
189.55	I33	1.12641e+08	1.248e+07	4.23992e+07	3.14399e+07	3.1093e+06	10.336	1.43851	0.883579	0.322346	13.5416
195.25	I34	1.14584e+08	1.06495e+07	4.37348e+07	3.13037e+07	3.82254e+06	10.4808	1.2067	0.86483	0.389568	13.4171
200.983	I35	1.12788e+08	1.11566e+07	4.28196e+07	3.12723e+07	3.83589e+06	10.4248	1.28428	0.877721	0.397153	13.4645
206.717	I36	1.14265e+08	1.16522e+07	4.47329e+07	3.24056e+07	4.29889e+06	10.7498	1.324	0.897769	0.439336	13.8694
212.467	I37	1.13153e+08	1.15772e+07	4.22116e+07	3.19628e+07	2.1971e+06	10.2437	1.32841	0.894211	0.226746	13.3605
218.233	I38	1.14698e+08	1.206e+07	4.3372e+07	3.14086e+07	3781085	10.3835	1.36516	0.866869	0.384961	13.4824
224	I39	1.13523e+08	1.18629e+07	4.21876e+07	3.28823e+07	4.19944e+06	10.2045	1.35675	0.916932	0.431978	13.3951
229.717	I40	1.13166e+08	1.17383e+07	4.36948e+07	3.34626e+07	2.84623e+06	10.6024	1.34674	0.936057	0.293703	13.8212
235.45	I41	1.14796e+08	1.21219e+07	4.11199e+07	3.34362e+07	3.19852e+06	9.83594	1.371	0.922041	0.32537	13.051
241.183	I42	1.14699e+08	1.15815e+07	4.21944e+07	3.35078e+07	2.34544e+06	10.1015	1.31099	0.924798	0.238792	13.2621
246.9	I43	1.14109e+08	1.07509e+07	4.14323e+07	3.16712e+07	2.09539e+06	9.97035	1.22326	0.878629	0.214438	12.9509
252.6	I44	1.14735e+08	1.30989e+07	4.28363e+07	3.46436e+07	3.02574e+06	10.2519	1.48229	0.955843	0.307958	13.6459
258.3	I45	1.16332e+08	1.25591e+07	4.11268e+07	3.32249e+07	2.3917e+06	9.70766	1.40169	0.904113	0.240083	12.9176
264.033	I46	116478508	1.06758e+07	4.16945e+07	3.40623e+07	3.41445e+06	9.8293	1.19001	0.925737	0.342319	12.8708
269.783	I47	1.1628e+08	1.32418e+07	4.43617e+07	3.46046e+07	1233847	10.4759	1.47856	0.942083	0.123912	13.8387
275.5	I48	1.16834e+08	1.23623e+07	4.35349e+07	34370531	3.64633e+06	10.2319	1.3738	0.93127	0.364453	13.4683
281.25	I49	1.14781e+08	14187648	42271047	3.58507e+07	1.3645e+06	10.1126	1.60485	0.988749	0.138822	13.6949
287.017	I50	1.16349e+08	1.22594e+07	4.22743e+07	3.36445e+07	2.78827e+06	9.97706	1.36804	0.915398	0.279851	13.1759											6.51792
292.733	I51	1.15162e+08	1.35156e+07	4.20054e+07	3.50732e+07	2.53165e+06	10.0158	1.52377	0.964107	0.256714	13.4678											7.45221
298.45	I52	1.15604e+08	1.2062e+07	4.0958e+07	3.42405e+07	2.24906e+06	9.72869	1.35469	0.937619	0.227187	12.9586											6.90797
304.183	I53	1.142e+08	1.28741e+07	4.36574e+07	3.47921e+07	2386368	10.4974	1.46367	0.964436	0.24402	13.8899
309.95	I54	1.14373e+08	1.33032e+07	41247283	3.49171e+07	2.04658e+06	9.9029	1.51018	0.966442	0.20896	13.346
315.7	I55	1.13384e+08	1.28231e+07	4.23341e+07	3.51648e+07	2.53219e+06	10.2525	1.46837	0.981783	0.260795	13.6844
321.433	I56	1.14601e+08	1.38472e+07	4.17105e+07	3.59638e+07	2.21237e+06	9.99418	1.5688	0.99343	0.225437	13.5498
327.167	I57	1.14922e+08	1.31388e+07	4.31862e+07	3.47308e+07	1.74491e+06	10.3189	1.48439	0.956693	0.177307	13.7167
332.933	I58	1.1287e+08	1.36065e+07	4.11134e+07	3.65513e+07	699148	10.0022	1.56517	1.02514	0.0723346	13.6176										Object	Integral [abs]	Integral [rel]
338.65	I59	1.14418e+08	1.30976e+07	4.32104e+07	3.64957e+07	200249	10.3701	1.48624	1.00973	0.0204377	13.8758										Integral 1	1.6066e+06	0.7651
344.383	I60	1.14131e+08	1.34005e+07	4.11843e+07	3.5731e+07	1.3493e+06	9.90877	1.52446	0.991066	0.138058	13.4154										Integral 2	1.63721e+06	0.7797
350.083	I61	1.14245e+08	1.41135e+07	42557112	3.5428e+07	1.38856e+06	10.2288	1.60395	0.98168	0.141932	13.7961										Integral 3	2.44396e+07	11.6394
355.817	I62	114562203	1.33164e+07	43311441	3.56593e+07	1.95957e+06	10.3813	1.50918	0.985351	0.199744	13.8612
361.517	I63	1.14028e+08	1.3242e+07	4.17043e+07	3.68004e+07	2.31669e+06	10.0429	1.50777	1.02164	0.237253	13.5939
367.25	I64	1.14691e+08	1.36231e+07	4.09265e+07	3.60406e+07	1.41731e+06	9.79866	1.5422	0.994772	0.144308	13.3304										Object	Integral [abs]	Integral [rel]
372.983	I65	1.14858e+08	13310584	4.17299e+07	3.70694e+07	951378	9.97647	1.50463	1.02168	0.096727	13.5245										Integral 1	1.04717e+07	0.8794
378.75	I66	1.15131e+08	1.29974e+07	4.07949e+07	3.75883e+07	119729	9.72981	1.46575	1.03353	0.0121441	13.2626										Integral 2	1.22008e+07	1.0247
384.5	I67	1.15773e+08	1.29992e+07	4.22407e+07	3.67102e+07	1.60442e+06	10.0187	1.45781	1.00378	0.161832	13.4841										Integral 3	1.68828e+08	14.1785
390.233	I68	114519254	1.38918e+07	4.13807e+07	37122962	646068	9.92222	1.57497	1.02618	0.0658802	13.5496
395.95	I69	1.15249e+08	1.34999e+07	4.35246e+07	3.68653e+07	2.53365e+06	10.3702	1.52085	1.0126	0.256723	13.9163
401.733	I70	1.14887e+08	1.43844e+07	4.27954e+07	3.66298e+07	1.35301e+06	10.2286	1.6256	1.00931	0.137526	13.8728
407.45	I71	1.14638e+08	1.39133e+07	4.24171e+07	3.69236e+07	1.50493e+06	10.1602	1.57578	1.01961	0.153301	13.7752
413.167	I72	1.1447e+08	1.50758e+07	4.17847e+07	3.70754e+07	1.67076e+06	10.0234	1.70994	1.0253	0.170442	13.7839
418.883	I73	1.14601e+08	1.48401e+07	4.20112e+07	3.78164e+07	1.51517e+06	10.0662	1.68129	1.0446	0.154393	13.8367
424.583	I74	1.15062e+08	1.40307e+07	4.26414e+07	3.7379e+07	-188195	10.1762	1.58321	1.02838	-0.0190998	13.8162
430.3	I75	1.14627e+08	1.32784e+07	4.25931e+07	3.71942e+07	1.88424e+06	10.2033	1.50402	1.02718	0.191957	13.7617
436.033	I76	1.14886e+08	1.3628e+07	4.18581e+07	3.71935e+07	743221	10.0046	1.54014	1.02485	0.075545	13.5945
441.75	I77	1.13976e+08	1.30454e+07	4.21397e+07	3.72192e+07	959367	10.1523	1.48606	1.03374	0.0982935	13.7059
447.45	I78	1.14799e+08	1.42431e+07	4.25815e+07	3.76933e+07	1.57354e+06	10.1852	1.61087	1.0394	0.160064	13.8749
453.183	I79	1.14563e+08	1.28469e+07	4.17181e+07	3.79741e+07	1.81774e+06	9.9993	1.45595	1.04931	0.185286	13.5539
458.917	I80	1.14278e+08	1.48558e+07	42564853	3.78107e+07	358316	10.2277	1.68783	1.0474	0.0366151	14.0104
464.667	I81	1.15088e+08	1.35367e+07	4.33191e+07	3.84176e+07	1.61439e+06	10.3357	1.52713	1.05672	0.163807	13.9762
470.367	I82	1.14167e+08	1.44638e+07	4.27413e+07	3.73179e+07	349242	10.2801	1.64488	1.03475	0.0357224	13.9945
476.083	I83	1.14782e+08	14397118	4.20988e+07	3.78988e+07	1.3125e+06	10.0713	1.62853	1.04523	0.133531	13.7903
481.783	I84	1.14352e+08	1.36173e+07	4.25006e+07	37821915	-142042	10.2056	1.54611	1.04703	-0.0145054	13.8458
487.5	I85	1.14281e+08	1.37183e+07	4.29285e+07	3.80081e+07	946800	10.3148	1.55854	1.05284	0.0967474	13.979
493.217	I86	1.14787e+08	1.45903e+07	4.32702e+07	3.85794e+07	1.62398e+06	10.3511	1.65032	1.06396	0.165213	14.1293
498.967	I87	1.14726e+08	1.46154e+07	4.33861e+07	3.75086e+07	528628	10.3843	1.65403	1.03497	0.0538077	14.1083
504.717	I88	1.1451e+08	1.38078e+07	4.24802e+07	3.84677e+07	1.50337e+06	10.1867	1.56558	1.06344	0.153313	13.8792
510.417	I89	1.14985e+08	1.4155e+07	4.27519e+07	3.93246e+07	759835	10.2095	1.59832	1.08264	0.0771675	13.9731
516.15	I90	1.14521e+08	1.40843e+07	4.19903e+07	3.69558e+07	1.01887e+06	10.0683	1.59678	1.02154	0.103894	13.7081
521.867	I91	1.14852e+08	1.3927e+07	4.32672e+07	3.76867e+07	591480	10.3445	1.57439	1.03874	0.0601389	13.9964
527.567	I92	1.14403e+08	1.46595e+07	4.16314e+07	3.75973e+07	969624	9.99251	1.66371	1.04035	0.0989743	13.7369
533.317	I93	1.14625e+08	1.40291e+07	4.4144e+07	3.81205e+07	63883.9	10.575	1.58908	1.05278	0.00650828	14.2697
539.033	I94	1.14469e+08	1.37472e+07	4.22859e+07	3.8002e+07	369506	10.1437	1.55926	1.05094	0.0376953	13.8048
544.783	I95	1.13032e+08	1.54606e+07	4.35891e+07	3.83173e+07	-178734	10.5892	1.77589	1.07313	-0.0184655	14.5114
550.517	I96	1.14095e+08	1.52456e+07	4.35386e+07	3.79821e+07	13464.9	10.4785	1.73489	1.05383	0.00137814	14.321
556.25	I97	1.13941e+08	1.46905e+07	4.26677e+07	3.80844e+07	44013.8	10.2827	1.67399	1.0581	0.00451092	14.0729
561.983	I98	1.14332e+08	1.53811e+07	4.26347e+07	3.91564e+07	2.6687e+06	10.2397	1.74669	1.08417	0.272577	14.1547
567.717	I99	1.14317e+08	1.3602e+07	4.26076e+07	3.73973e+07	1.25598e+06	10.2345	1.54485	1.03559	0.1283	13.8505
573.45	I100	1.14946e+08	1.4416e+07	4.36804e+07	3.75103e+07	1.03673e+06	10.4347	1.62833	1.03303	0.105324	14.1291
579.183	I101	1.15319e+08	1.40935e+07	4.33917e+07	3.8898e+07	456468	10.3322	1.58676	1.06779	0.0462235	14.0546
584.9	I102	1.13456e+08	1.56837e+07	4.4244e+07	3.87e+07	1.13455e+06	10.7082	1.79479	1.0798	0.116776	14.6626
590.617	I103	1.14103e+08	1.5262e+07	4.3341e+07	3.67221e+07	474626	10.4302	1.73663	1.0188	0.0485747	14.2044
596.367	I104	1.13992e+08	1.47318e+07	4.24187e+07	3.85001e+07	625151	10.2182	1.67793	1.06917	0.0640422	14.0344
602.1	I105	1.14393e+08	1.54004e+07	4.16578e+07	3.82016e+07	1.19358e+06	9.99966	1.74794	1.05716	0.121845	13.8619
607.85	I106	1.15021e+08	1.44866e+07	4.22187e+07	3.85015e+07	664289	10.079	1.63525	1.05965	0.0674429	13.8336
613.567	I107	1.12824e+08	1.53155e+07	4.25686e+07	3.80031e+07	-373243	10.3605	1.76249	1.0663	-0.0386319	14.2555
619.317	I108	1.14242e+08	1.46447e+07	4.23797e+07	3.81522e+07	-660353	10.1864	1.66437	1.05719	-0.0675004	13.9652
625.067	I109	1.13307e+08	1.52391e+07	4.40797e+07	3.94393e+07	898640	10.6824	1.7462	1.10187	0.0926152	14.6324
630.8	I110	1.14083e+08	1.52376e+07	4.41249e+07	3.83891e+07	1226926	10.6207	1.73416	1.06524	0.125589	14.4853
636.55	I111	1.14725e+08	1.54128e+07	4.36109e+07	3.85819e+07	1.26099e+06	10.4382	1.74429	1.0646	0.128354	14.3117
642.317	I112	1.13968e+08	1.47512e+07	4.29519e+07	3.86963e+07	269380	10.3488	1.6805	1.07484	0.0276017	14.1789
648.067	I113	1.11922e+08	1.60956e+07	4.24284e+07	3.77997e+07	-1102531	10.4095	1.86717	1.06913	-0.115035	14.4149
653.8	I114	1.15542e+08	1.45343e+07	4.26185e+07	3.91583e+07	962010	10.1286	1.63324	1.07287	0.0972292	13.9076
659.533	I115	1.12871e+08	1.52532e+07	4.31185e+07	3.70363e+07	839101	10.4899	1.75459	1.03874	0.0868138	14.322
665.25	I116	1.13886e+08	1.48143e+07	43449305	3.90056e+07	450678	10.4762	1.6889	1.08422	0.0462117	14.3335
670.983	I117	1.13099e+08	1.55326e+07	4.38603e+07	3.84391e+07	427910	10.6488	1.7831	1.0759	0.0441822	14.5837
676.767	I118	1.1349e+08	1.60881e+07	4.30055e+07	3.82824e+07	-1.05895e+06	10.4053	1.84052	1.06783	-0.108961	14.3815
682.517	I119	1.14828e+08	1.50183e+07	4.27399e+07	3.83959e+07	801854	10.2206	1.69811	1.05851	0.0815459	14.0357
688.233	I120	1.13871e+08	1.54123e+07	4.32988e+07	3.72897e+07	-292179	10.4412	1.75731	1.03666	-0.0299633	14.2719
693.933	I121	1.14743e+08	1.4873e+07	4.3051e+07	3.81348e+07	1.93747e+06	10.3026	1.68293	1.0521	0.19718	14.0897
699.65	I122	1.14814e+08	1.51368e+07	4.35666e+07	3.84362e+07	-170109	10.4196	1.71172	1.05976	-0.0173017	14.2508
705.417	I123	1.12773e+08	1.59351e+07	4.35767e+07	3.78892e+07	-137448	10.6106	1.83461	1.06358	-0.0142328	14.5724
711.133	I124	1.12979e+08	1.58708e+07	4.37713e+07	3.78375e+07	538184	10.6385	1.82387	1.06019	0.0556274	14.5828
716.867	I125	1.13466e+08	1.54282e+07	4.37968e+07	3.77404e+07	254686	10.5991	1.7654	1.05293	0.0262117	14.4703
722.583	I126	1.13731e+08	1.60589e+07	4.29973e+07	3.86901e+07	-243564	10.3813	1.83329	1.07692	-0.0250086	14.3685
728.35	I127	1.14817e+08	1.60616e+07	4.32146e+07	3.90413e+07	-312778	10.3351	1.81626	1.07641	-0.0318117	14.3042
734.067	I128	1.14971e+08	1.52531e+07	4.4002e+07	3.76666e+07	1.30146e+06	10.5093	1.72251	1.03712	0.132189	14.306
739.817	I129	1.16053e+08	1.58518e+07	4.22293e+07	3.79769e+07	1.09947e+06	9.99191	1.77344	1.03591	0.110633	13.8372
745.583	I130	1.13375e+08	1.58412e+07	4.19638e+07	3.7718e+07	857906	10.1636	1.81412	1.05316	0.0883648	14.0841
751.333	I131	114195110	1.5887e+07	4.42334e+07	3.7833e+07	1.94328e+06	10.6363	1.8063	1.04878	0.198721	14.5402
757.067	I132	115123491	1.70926e+07	4.39178e+07	3.90155e+07	198388	10.4753	1.92769	1.07283	0.0201236	14.5487
762.783	I133	1.1399e+08	1.35224e+07	4.23204e+07	3.83411e+07	246386	10.1946	1.54021	1.06477	0.0252409	13.8644
768.5	I134	1.15159e+08	1.60567e+07	4.45082e+07	3.86508e+07	1.48778e+06	10.6128	1.8103	1.06247	0.150867	14.5481
774.233	I135	1.14315e+08	1.61602e+07	4.54059e+07	3.85214e+07	1.44479e+06	10.9069	1.83543	1.06674	0.14759	14.8758
780	I136	1.1531e+08	1.51162e+07	4.50909e+07	3.79386e+07	922486	10.7377	1.70203	1.04153	0.0934214	14.5228
785.75	I137	1.13634e+08	1.54069e+07	4.39461e+07	3.81249e+07	113177	10.6195	1.76036	1.06209	0.0116307	14.504
791.5	I138	1.15356e+08	1.57815e+07	4.43084e+07	3.81126e+07	42946.6	10.5472	1.77624	1.04589	0.00434754	14.4152
797.217	I139	1.15726e+08	1.64304e+07	4.44165e+07	37902321	169190	10.5391	1.84336	1.0368	0.0170726	14.456
802.933	I140	1.15171e+08	1.60706e+07	4.37591e+07	3.81634e+07	-476928	10.4331	1.81168	1.04897	-0.0483575	14.3427
808.667	I141	1.15233e+08	1.63502e+07	4.47858e+07	40104007	-197728	10.6722	1.84221	1.10172	-0.0200376	14.7178
814.4	I142	1.15809e+08	1.71997e+07	4.37902e+07	3.81585e+07	204805	10.383	1.92829	1.04306	0.0206515	14.3975
820.133	I143	1.14314e+08	1.64429e+07	4.20237e+07	38690013	892830	10.0945	1.86754	1.07141	0.0912059	14.1048
825.85	I144	1.13227e+08	1.68124e+07	4.15798e+07	3.80441e+07	578085	10.0838	1.92786	1.06365	0.0596209	14.1389
831.583	I145	1.15584e+08	1.59962e+07	4.48621e+07	3.80432e+07	1.16068e+06	10.6579	1.79686	1.04193	0.117265	14.5386
837.333	I146	1.15215e+08	1.63929e+07	4.44523e+07	3.82133e+07	25650	10.5943	1.84731	1.04994	0.00259976	14.5415
843.067	I147	1.14817e+08	1.73093e+07	4.31336e+07	3.83216e+07	1.10831e+06	10.3157	1.95735	1.05657	0.112723	14.3862
848.817	I148	1.15177e+08	1.68618e+07	44645370	3.77125e+07	331857	10.6438	1.90078	1.03652	0.0336464	14.6177
854.55	I149	1.14649e+08	17699452	4.49604e+07	3.78214e+07	-955845	10.7684	2.0044	1.04431	-0.0973583	14.8614
860.283	I150	1.14848e+08	1.55398e+07	4.35365e+07	3.85514e+07	1.29485e+06	10.4093	1.75678	1.06262	0.131659	14.2913
866.017	I151	1.15264e+08	1.77107e+07	4.43252e+07	3.82167e+07	556361	10.5596	1.99497	1.04959	0.0563662	14.6537
871.783	I152	1.15702e+08	1.68508e+07	4.59273e+07	3.75926e+07	323201	10.8998	1.89092	1.02854	0.0326201	14.8478
877.517	I153	1.15001e+08	1.64971e+07	4.43285e+07	3.69103e+07	83430.8	10.5845	1.86252	1.01603	0.0084719	14.4791
883.217	I154	1.15851e+08	1.57822e+07	4.24012e+07	3.8202e+07	344398	10.0501	1.76874	1.04387	0.034715	13.9066
888.917	I155	1.16173e+08	1.66667e+07	4.34066e+07	3.72382e+07	607184	10.2598	1.86268	1.01471	0.0610338	14.1519
894.617	I156	1.16531e+08	1.67673e+07	4.44227e+07	3.83077e+07	778402	10.4678	1.86817	1.04065	0.0780043	14.4172
900.35	I157	1.1684e+08	1.6272e+07	4.31866e+07	3.8371e+07	1.0688e+06	10.1496	1.80819	1.03961	0.106822	14.037
906.083	I158	1.17142e+08	1.54123e+07	4.41758e+07	3.83679e+07	2952.69	10.3553	1.70825	1.03685	0.000294348	14.1372
911.817	I159	1.16827e+08	1.66564e+07	4.42679e+07	3.87031e+07	-230228	10.4048	1.8511	1.04873	-0.0230129	14.3534
917.583	I160	1.15623e+08	1.75823e+07	4.51419e+07	3.80208e+07	251935	10.7207	1.97436	1.04097	0.0254448	14.777
923.3	I161	1.16349e+08	1.63645e+07	4.24432e+07	3.72482e+07	228988	10.017	1.82615	1.01345	0.022983	13.87
929.05	I162	1.16061e+08	1.6817e+07	4.46257e+07	3.86802e+07	427089	10.5582	1.8813	1.05502	0.0429722	14.5495
934.8	I163	1.16185e+08	1.72963e+07	4.29443e+07	37398250	1.0017e+06	10.1495	1.93284	1.01897	0.10068	14.1203
940.517	I164	1.16248e+08	1.82037e+07	4.35571e+07	3.81064e+07	598318	10.2888	2.03315	1.0377	0.060104	14.3974
946.283	I165	1.1705e+08	1.6629e+07	4.26255e+07	3.75841e+07	365007				0.0364153
952.017	I166	1.1676e+08	1.654e+07	4.48358e+07	3.76703e+07	39477				0.00394825
957.75	I167	1.16737e+08	16282762	4.47986e+07	3.80587e+07	280316				0.0280412
963.517	I168	1.1621e+08	1.70521e+07	4.42896e+07	3.81782e+07	555144				0.0557849
970.817	I169	1.49556e+08	2.55127e+07	4.05137e+07	4.58578e+07	1.46574e+06				0.114448
