# Supplementary material for: Mapping catalyst activation, turnover speciation and deactivation in Rh/PPh3-catalysed olefin hydroformylation
Source: Royal Society of Chemistry journal article supplement (doi:10.1039/d2cy00312k), 2022-01-01
Supplement: d2cy00312k13.xlsx [file d2cy00312k13.xlsx]

## Sheet: Proton
time [min]:	Peak name	1-hexene #1	1-heptanal #1	2-methylhexanal #1	Hydrogen #2	TMB aromatic #3	TMB methyl #9	1-hexene (other H double bond)	[1-hexene]	[1-heptanal]	[2-methylhexanal]	[Hydrogen]	[TMB aromatic]	[TMB methyl]	[1-hexene (other H double bond)]	Conversion	Regioselectivity n-heptanal	Regioselectivity 2-methylhexanal	L:B ratio
0.0166667	I0	4.6102e+07	-9265	162	-10067.5	4.6119e+07	186129196	104522481	484.434	-0.115607	0.00186525	-0.0111298	102.212	85.4423	500.893	0	101.64	-1.6399	-61.9795		INTERNAL REFERENCE			FLOW CALIBRATION
7.3	I1	4.25591e+07	1531.75	-3740.5	5339.75	4.55842e+07	187253905	97926795	444.519	0.0189981	-0.0428089	0.00586772	100.42	85.4423	466.466	8.23954	-79.7876	179.788	-0.443788		1-hexene Volume (mL)	1.3			1-hexene (initial)	1-hexene (end)	1-heptanal (end)	2-methylhexanal (end)	Hydrogen (end)	TMB aromatic (initial)	TMB methyl (initial)	TMB aromatic (end)	TMB methyl (end)	1-hexene (other H double bond)
14.4667	I2	4.43981e+07	78359.8	27653.5	17544087	4.75054e+07	1.92846e+08	1.02139e+08	450.281	0.943705	0.307309	18.7198	101.618	85.4423	472.422	7.05008	75.4352	24.5648	3.07086		1-hexene n (moles)	0.0104729		0 mL/min	29142933	4176547	20157390	6.62235e+06	1074285	2.00388e+07	62136918	20500117	6.30756e+07	6.17893e+06
21.5667	I3	4.64658e+07	528585	229385	1.87581e+07	49431224	1.97228e+08	106945904	460.781	6.22443	2.49248	19.5704	103.388	85.4423	483.666	4.88272	71.4064	28.5936	2.49728		Reaction Volume (L)	0.0224		4 mL/min	6.75363e+06	987741	4.8867e+06	1.7202e+06	1.58738e+06	7.57361e+06	3.6012e+07	8.49335e+06	3.78577e+07	1.62179e+06
28.6833	I4	4.71674e+07	1.3316e+06	612292	1.78585e+07	5.04008e+07	1.98912e+08	1.08231e+08	463.778	15.5477	6.59679	18.4741	104.523	85.4423	485.332	4.26409	70.2102	29.7898	2.35686		1-hexene (M)	0.467541		CF	4.31515	4.22838	4.12495	3.84975	0.676765	2.64587	1.72545	2.41367	1.66612	3.80995
35.8167	I5	4.31319e+07	2.45103e+06	1.13351e+06	1.79586e+07	4.89547e+07	196557003	99407095	429.18	28.9609	12.3587	18.8003	102.741	85.4423	451.106	11.406	70.0901	29.9099	2.34337		1-hexene(mM)	467.541
42.95	I6	4.15379e+07	3.93008e+06	1.77836e+06	1.77969e+07	4.89662e+07	1.96377e+08	9.57101e+07	413.698	46.4797	19.4073	18.648	102.859	85.4423	434.727	14.6018	70.5446	29.4554	2.39496
50.0833	I7	3.81938e+07	5.64056e+06	2.22308e+06	1.58195e+07	47167620	1.91055e+08	87293550	390.988	68.5672	24.9362	17.0378	101.841	85.4423	407.542	19.2898	73.3312	26.6688	2.7497		# is the number of protons of the peak taken for integration			0 mL	static with long delay (flow+ full relaxtion effects)
57.2333	I8	3.74728e+07	7935452	2.88173e+06	17391194	4.94124e+07	1.95331e+08	8.63358e+07	375.209	94.3523	31.6167	18.3205	104.352	85.4423	394.247	22.547	74.9012	25.0988	2.98426		If #>1 the integration will be divided by the number of protons			4 mL	flow with shot delay (flow + poor relaxiation)
64.3833	I9	3.3523e+07	9331725	3553553	1.63491e+07	46826087	1.907e+08	7.6827e+07	343.813	113.649	39.9344	17.641	101.292	85.4423	359.346	29.0279	73.9982	26.0018	2.84588
72.3333	I10	3.34386e+07	1.25799e+07	4.16538e+06	16739483	5.00421e+07	1.97537e+08	76458041	331.078	147.905	45.19	17.4371	104.502	85.4423	345.243	31.6568	76.597	23.403	3.27296						initial CF were calculated under Argon ( the reactor was still no pressurized)
79.4667	I11	29848590	1.40979e+07	4.57904e+06	16268464	48951967	1.95402e+08	6.84854e+07	298.762	167.563	50.2206	17.1316	103.342	85.4423	312.622	38.3277	76.9402	23.0598	3.33655		INTERNAL REFERENCE STANDARD				final CF were calculated under 10 bar H2/CO ( reactor pressurized)
86.6	I12	2.61451e+07	1.52191e+07	5.2112e+06	1.51389e+07	4.70096e+07	1.90858e+08	59923659	267.922	185.196	58.5143	16.3216	101.604	85.4423	280.051	44.6939	75.9902	24.0098	3.16497		Mass of TMB (g)	0.3219
93.7167	I13	2.5047e+07	18373132	6.08904e+06	16002661	49759387	197768382	57922967	247.701	215.764	65.9823	16.65	103.79	85.4423	261.242	48.868	76.581	23.419	3.27003		Molecular weight of TMB (g/mol)	168.19
100.9	I14	2.37227e+07	2.15171e+07	7.00661e+06	1.34934e+07	4.96005e+07	1.92703e+08	5.42179e+07	240.771	259.327	77.9212	14.4083	106.178	85.4423	250.96	50.2984	76.895	23.105	3.32807		Moles of TMB (n)	0.00191391
108.05	I15	2.1846e+07	2.40448e+07	7.87143e+06	1.47089e+07	5.22521e+07	2.02108e+08	5.02659e+07	211.406	276.306	83.4653	14.9754	106.649	85.4423	221.84	56.3601	76.8005	23.1995	3.31043		Reaction Volume (L)	0.0224
115.183	I16	1.95614e+07	2.62551e+07	8.32144e+06	13860128	5.19434e+07	1.9959e+08	45124409	191.686	305.512	89.3502	14.2892	107.356	85.4423	201.661	60.4309	77.3718	22.6282	3.41926		TMB (M)	0.0854423
122.283	I17	18754421	3.05879e+07	9574734	1.39847e+07	5.46747e+07	2.0553e+08	4.29112e+07	178.467	345.642	99.8357	14.0009	109.735	85.4423	186.228	63.1598	77.5891	22.4109	3.46211		TMB (mM)	85.4423		FLOW CALIBRATION
129.4	I18	1.68832e+07	32957323	9.98431e+06	1.41197e+07	5.50808e+07	2.06333e+08	3.84685e+07	160.035	370.968	103.701	14.081	110.12	85.4423	166.298	66.9646	78.1529	21.8471	3.57727						1-hexene (initial)	1-hexene (end)	1-heptanal (end)	2-methylhexanal (end)	Hydrogen (end)	TMB aromatic (initial)	TMB methyl (initial)	TMB aromatic (end)	TMB methyl (end)	1-hexene (other H double bond)
136.517	I19	1.53913e+07	3.5602e+07	1.12375e+07	13231439	5.61375e+07	2.0736e+08	3.52781e+07	145.172	398.752	116.14	13.1299	111.677	85.4423	151.751	70.0328	77.4438	22.5562	3.43338					0 mL/min	2.78016e+07	7.53593e+06	1.87317e+07	5722346	4.41821e+06	2.16925e+07	6.43757e+07	2.16584e+07	6.12478e+07	1.44223e+07
144.45	I20	13810973	3.82443e+07	12538195	14019555	56235989	2.069e+08	31220098	130.555	429.298	129.87	13.9429	112.122	85.4423	134.593	73.0501	76.7744	23.2256	3.30559					4 mL/min	6.11977e+06	1757276	3.67838e+06	1.21779e+06	3.89945e+06	7.34342e+06	3.6664e+07	7.98182e+06	3.63252e+07	3.68713e+06
151.567	I21	1.04159e+07	3.52562e+07	11067812	1.43555e+07	5.34456e+07	2.04529e+08	2.39396e+07	99.6031	400.344	115.969	14.4424	107.794	85.4423	104.403	79.4393	77.539	22.461	3.45217					CF	4.54292	4.28842	5.09238	4.69897	1.13304	2.954	1.75583	2.71347	1.6861	3.91153
158.667	I22	9125567	3.64859e+07	1.12906e+07	14356008	53655557	205074229	2.1115e+07	87.0318	413.206	117.989	14.4046	107.929	85.4423	91.8397	82.0343	77.788	22.212	3.50207
165.783	I23	7.37179e+06	3.44642e+07	1.14894e+07	1.26559e+07	50875461	1.96491e+08	1.73432e+07	73.3771	407.36	125.312	13.2535	106.808	85.4423	78.7296	84.853	76.4749	23.5251	3.25077
172.883	I24	6.59467e+06	35965621	1.14756e+07	13204060	5.19165e+07	200221343	15496368	64.4187	417.186	122.829	13.5699	106.962	85.4423	69.035	86.7023	77.2545	22.7455	3.39648
180.067	I25	6.14989e+06	3.94257e+07	1.25643e+07	1.33803e+07	5.37185e+07	2.04374e+08	1.42743e+07	58.8533	448.03	131.749	13.4716	108.426	85.4423	62.2987	87.8511	77.2759	22.7241	3.40062
187.217	I26	5.44318e+06	4.07484e+07	1.26191e+07	13436618	5.45493e+07	206414039	1.26004e+07	51.5754	458.484	131.016	13.3946	109.015	85.4423	54.4498	89.3535	77.775	22.225	3.49944
194.367	I27	4.52653e+06	4.0644e+07	1.29289e+07	1.2498e+07	5.34532e+07	2.0072e+08	1.07212e+07	44.1067	470.284	138.041	12.8124	109.855	85.4423	47.6436	90.8952	77.308	22.692	3.40685
201.483	I28	4122156	4.35638e+07	1.29369e+07	1.17271e+07	54354410	2.01444e+08	9.79765e+06	40.0221	502.257	137.63	11.9789	111.306	85.4423	43.3829	91.7384	78.4915	21.5085	3.64933
208.617	I29	3.71335e+06	4.41921e+07	1.38622e+07	13020149	5.59358e+07	2.08124e+08	8.73598e+06	34.8958	493.145	142.74	12.8728	110.867	85.4423	37.4402	92.7966	77.5526	22.4474	3.45485
216.533	I30	3.21519e+06	4.80452e+07	1.44711e+07	10592947	5.57044e+07	1.9934e+08	7.8689e+06	31.5458	559.768	155.576	10.9346	115.274	85.4423	35.2102	93.4881	78.2516	21.7484	3.59805
223.65	I31	2.64891e+06	4.41964e+07	1.38997e+07	1.28087e+07	5.53338e+07	2.06851e+08	6.48712e+06	25.046	496.228	144.007	12.7417	110.349	85.4423	27.9733	94.8298	77.5072	22.4928	3.44587
230.783	I32	2.21273e+06	4.36967e+07	1.38393e+07	1.19485e+07	5.47863e+07	203608842	5.43413e+06	21.255	498.43	145.664	12.0752	110.997	85.4423	23.8058	95.6124	77.3847	22.6153	3.42178
237.9	I33	1.9638e+06	44605156	14068105	13048816	5.55372e+07	207835327	4.90044e+06	18.4802	498.447	145.061	12.9191	110.23	85.4423	21.0313	96.1852	77.4577	22.5423	3.43611
245.017	I34	1.78115e+06	4.55933e+07	1.44697e+07	1.25902e+07	5.58885e+07	207810196	4381190	16.7634	509.55	149.221	12.4665	110.941	85.4423	18.8051	96.5396	77.3486	22.6514	3.41474
252.133	I35	1353455	4.40382e+07	14292096	1.09803e+07	5.48473e+07	2.02879e+08	3.68276e+06	13.0478	504.135	150.971	11.1367	111.521	85.4423	16.1915	97.3066	76.9547	23.0453	3.33927
259.267	I36	1.30448e+06	4.5951e+07	14209895	12397175	55635196	2.06956e+08	3339555	12.3279	515.669	147.146	12.3261	110.894	85.4423	14.3933	97.4552	77.7998	22.2002	3.50447
266.367	I37	1.0446e+06	4.44304e+07	13899279	12702350	5.44832e+07	2.06062e+08	2.84676e+06	9.91473	500.766	144.554	12.6843	109.069	85.4423	12.3226	97.9533	77.5997	22.4003	3.46422
273.483	I38	948700	4.44284e+07	13811303	11956803	5.40433e+07	2.03323e+08	2.43165e+06	9.12583	507.49	145.574	12.1006	109.646	85.4423	10.6675	98.1162	77.7091	22.2909	3.48613
280.6	I39	814758	45582682	1.41366e+07	1.21861e+07	55163311	2.06341e+08	2259630	7.72276	513.059	146.823	12.1523	110.281	85.4423		98.4058	77.7501	22.2499	3.4944

## Sheet: Hydride
time [min]:	Peak name	A/B	C	Riv 1	Riv 2	[A/B]	[C]	Sum Hyds	%			1	2
0.0166667	I0	-27873.6	-7069.64	-562.687	-141.457	-0.00497256	-0.00125008	-0.00622264	-0.262626	RG Calibration				Flow Calibration
7.18333	I1	78746.1	-19151.3	1589.66	-383.202	0.0140481	-0.00338641	0.0106616	0.449974		Hyd 1	Hyd 2			Hyd1	Hyd 2	1-hexene
14.2833	I2	1.30565e+06	19525.7	26357.2	390.692	0.232923	0.00345261	0.236376	9.97621	CF	0.9894	0.9894		0 mL/min	5.35955e+06	307205	29142933
21.3833	I3	2.50798e+06	52657.1	50628.9	1053.62	0.447415	0.00931104	0.456726	19.2761	RG Hyd	203	203		4 mL/min	5.17595e+06	299319	6.75363e+06
28.5167	I4	3.41364e+06	68277.3	68911.5	1366.17	0.608982	0.0120731	0.621055	26.2116	RG 1H	4	4		CF	1.03547	1.02634	4.31515
35.6667	I5	4.3192e+06	70743.8	87192.2	1415.52	0.770532	0.0125092	0.783041	33.0482	Int TMB	87016710	87016710
42.7833	I6	5.1041e+06	129890	103037	2599	0.910554	0.0229678	0.933522	39.3992	[TMB]	85.4423	85.4423
49.9167	I7	5.87301e+06	148403	118559	2969.42	1.04773	0.0262412	1.07397	45.3267
57.0833	I8	6.54111e+06	122541	132046	2451.95	1.16691	0.0216683	1.18858	50.164	IRF	51.2937	51.2937
64.2167	I9	7.01598e+06	143829	141632	2877.89	1.25163	0.0254324	1.27706	53.8982
72.1833	I10	7.3787e+06	144646	148955	2894.24	1.31634	0.0255768	1.34191	56.6353
79.3167	I11	7.86475e+06	238996	158767	4782.12	1.40305	0.0422603	1.44531	60.999
86.4333	I12	8.20865e+06	198630	165709	3974.41	1.4644	0.0351225	1.49952	63.2871
93.5833	I13	8.50164e+06	172247	171624	3446.52	1.51666	0.0304574	1.54712	65.2961
100.767	I14	8.91438e+06	209644	179956	4194.79	1.5903	0.03707	1.62737	68.6828
107.9	I15	9.03398e+06	277234	182370	5547.21	1.61163	0.0490216	1.66065	70.0878
115	I16	9.19374e+06	328622	185595	6575.46	1.64013	0.0581084	1.69824	71.6741
122.117	I17	9.88804e+06	373744	199611	7478.3	1.76399	0.0660869	1.83008	77.2384
129.233	I18	9.66497e+06	340542	195108	6813.96	1.7242	0.0602161	1.78441	75.311
136.35	I19	9.84061e+06	368513	198653	7373.64	1.75553	0.065162	1.82069	76.8422
144.267	I20	1.00443e+07	440090	202766	8805.83	1.79187	0.0778185	1.86969	78.9101
151.383	I21	1.01381e+07	437707	204659	8758.14	1.8086	0.0773971	1.886	79.5985
158.5	I22	1.00574e+07	393146	203029	7866.52	1.7942	0.0695177	1.86372	78.6581
165.6	I23	1.034e+07	414693	208734	8297.66	1.84462	0.0733277	1.91795	80.9468
172.75	I24	1.02435e+07	475087	206787	9506.1	1.82741	0.0840069	1.91142	80.6713
179.917	I25	1.02026e+07	538241	205960	10769.8	1.8201	0.0951741	1.91528	80.8342
187.067	I26	1.02426e+07	519318	206768	10391.1	1.82724	0.0918279	1.91907	80.9941
194.183	I27	1.05093e+07	553784	212152	11080.8	1.87482	0.0979224	1.97274	83.2594
201.333	I28	1.03116e+07	521562	208162	10436	1.83956	0.0922247	1.93178	81.5307
208.467	I29	1.05586e+07	562974	213148	11264.6	1.88362	0.0995473	1.98317	83.6994
216.367	I30	1.026e+07	532714	207119	10659.2	1.83034	0.0941967	1.92454	81.225
223.483	I31	1.05661e+07	586014	213300	11725.7	1.88497	0.103621	1.98859	83.9282
230.617	I32	1.01332e+07	520223	204560	10409.2	1.80773	0.091988	1.89972	80.1773
237.733	I33	1.05017e+07	565155	212000	11308.3	1.87347	0.099933	1.97341	83.2874
244.85	I34	1.05431e+07	557840	212834	11161.9	1.88085	0.0986396	1.97949	83.5441
251.967	I35	1.05037e+07	583510	212040	11675.5	1.87383	0.103179	1.97701	83.4394
259.1	I36	1.04881e+07	585027	211724	11705.9	1.87104	0.103447	1.97449	83.333
266.2	I37	1.04441e+07	560798	210836	11221.1	1.86319	0.0991625	1.96235	82.8209
273.3	I38	1.04361e+07	588705	210676	11779.5	1.86177	0.104097	1.96587	82.9694
280.433	I39	1.02251e+07	552156	206414	11048.2	1.82412	0.0976346	1.92175	81.1074
												Rh concentration
												actual weight (g)	0.0129
												MW RhHCO(PPh3)3 (g/mol)	918.78
												MW Rh(acac)(CO)2 (g/mol)	258.03
												Number of mol (n)	4.99942e-05
												actual volume of reaction (L)	0.0211
												[Rh] (M)	0.00236939
												[Rh] (mM)	2.36939
												0

## Sheet: Phosphorus
time [min]:	Peak name	internal standard #1	OPPh3	PPh3	A/B	C	[PPH3]	[OPPH3]	[A/b]	[C]	total phosphorus		when phosphorus source is PPH3
0.0166667	I0	1.19347e+08	1.27265e+06	1.78682e+07	-391337	-169948	5.11671	0.121629	-0.0145129	-0.00418913	5.20512
7.16667	I1	1.20423e+08	1.65498e+06	1.85961e+07	4.34217e+06	1.00904e+06	5.27755	0.156756	0.159592	0.02465	5.77814		INTERNAL REFERENCE (CF SPECTRUM)			FLOW CALIBRATION
14.2667	I2	1.22674e+08	1.44783e+06	2.13597e+07	1.07329e+07	1807.38	5.95062	0.134619	0.387239	4.33425e-05	6.85976		Triphenylphosphine mass (g)	0.0792			Triphenylphosphosphate	Peak 1	Peak 2	Peak 3
21.4	I3	1.24268e+08	1.89982e+06	2.20305e+07	1.57892e+07	285518	6.05879	0.174379	0.562363	0.00675917	7.36465		Triphenylphosphine n (moles)	0.000301956		0 mL/min	4.7106e+07	1019112491	4935514	11101407	2720052
28.5167	I4	1.24427e+08	2.95377e+06	2.51605e+07	2.13801e+07	-588024	6.91075	0.270771	0.760517	-0.0139027	8.68865		Reaction Volume (L)	0.0224		4 mL/min	1.30273e+07	7.92691e+07	1.15025e+06	3.33378e+06	1.02344e+06
35.6667	I5	1.25946e+08	3.02912e+06	2.66717e+07	2.67081e+07	39631.4	7.23748	0.27433	0.938582	0.000925709	9.3899		Triphenylphosphine concentration (M)	0.0134802		CF	4.9	12.8564	4.2908	3.32998	3.32
42.7833	I6	1.26772e+08	3.455e+06	2.97724e+07	3.08544e+07	-76648.8	8.02621	0.31086	1.07723	-0.00177869	10.4897		Triphenylphosphine concentration (mM)	13.4802			internal standard			#	acyl cpmplex
49.9167	I7	1.27878e+08	4.07399e+06	3.2102e+07	3.4288e+07	1.13187e+06	8.57938	0.363382	1.18675	0.0260386	11.3423
57.0667	I8	1.27001e+08	3.34693e+06	3.34495e+07	3.79006e+07	1.97712e+06	9.0013	0.300595	1.32085	0.0457981	11.9894
64.2167	I9	1.27647e+08	4.35823e+06	3.45398e+07	4.02648e+07	192708	9.24762	0.38944	1.39614	0.00444129	12.4338		[Triphenylphosphate] ACTUAL EXPERIMENT
72.1833	I10	1.25644e+08	4.52621e+06	3.7481e+07	4.39757e+07	1.96355e+06	10.1951	0.410898	1.54912	0.0459748	13.7502		Triphenylphosphate mass (g)	0.0952
79.3167	I11	1.26887e+08	3.8047e+06	3.86063e+07	46865670	1.88239e+06	10.3982	0.342013	1.63474	0.0436425	14.0534		Triphenylphosphate n (moles)	0.000291774
86.4333	I12	1.29085e+08	5.13529e+06	4.04915e+07	4.9286e+07	970059	10.7203	0.453762	1.6899	0.0221075	14.576		Reaction Volume (L)	0.0224
93.5833	I13	1.28472e+08	4.11917e+06	41908112	4.96443e+07	1.9092e+06	11.1484	0.365715	1.71031	0.0437182	14.9784		Triphenylphosphate concentration (M)	0.0130256
100.767	I14	1.31235e+08	4.37527e+06	4.32177e+07	5.22813e+07	2.49072e+06	11.2547	0.380274	1.76324	0.0558336	15.2173		Triphenylphosphate concentration (mM)	13.0256
107.9	I15	1.32081e+08	4.70014e+06	4.34731e+07	5.42228e+07	2.74971e+06	11.2487	0.405892	1.817	0.0612442	15.3498
115	I16	1.32635e+08	4.32571e+06	4.45844e+07	5.54511e+07	2.50346e+06	11.488	0.371996	1.8504	0.0555266	15.6163
122.117	I17	1.31707e+08	5.20345e+06	4.46597e+07	5.56271e+07	2.38238e+06	11.5885	0.450632	1.86935	0.0532133	15.831
129.233	I18	1.33139e+08	4.55444e+06	4.44454e+07	5.70646e+07	3392457	11.4089	0.390186	1.89704	0.0749599	15.6681
136.35	I19	1.34197e+08	4.65607e+06	4.28018e+07	5.87499e+07	2.95722e+06	10.9003	0.395746	1.93766	0.0648275	15.2362
144.267	I20	1.31741e+08	5.70673e+06	4.40062e+07	5.79369e+07	2.95808e+06	11.416	0.494091	1.94647	0.0660554	15.8691
151.383	I21	1.3057e+08	4.71937e+06	4.33604e+07	5.78254e+07	2.74775e+06	11.3494	0.41227	1.96015	0.061909	15.7438		when phosphorus source is RhHCOPPh33
158.5	I22	1.31218e+08	4.95184e+06	4.45756e+07	5.87077e+07	3.24992e+06	11.6098	0.430441	1.98023	0.0728615	16.0735
165.6	I23	1.30005e+08	4.81054e+06	4.34566e+07	5.94623e+07	3.85715e+06	11.424	0.422062	2.0244	0.0872826	15.9821		Rh concentration
172.783	I24	1.32069e+08	5.33379e+06	4.39581e+07	57571576	3.88439e+06	11.3752	0.460655	1.92939	0.0865248	15.7811		actual weight (g)	0.0129
179.933	I25	1.33423e+08	5.04337e+06	4.42758e+07	5.92601e+07	3.90127e+06	11.3411	0.431153	1.96583	0.086019	15.79		MW RhHCO(PPh3)3 (g/mol)	918.78
187.05	I26	1.33797e+08	4.845e+06	4.41053e+07	5.89027e+07	2.6033e+06	11.2659	0.413037	1.94851	0.0572398	15.6332		MW Rh(acac)(CO)2 (g/mol)	258.03
194.2	I27	1.33633e+08	5.45343e+06	4.38619e+07	6.00472e+07	4.81827e+06	11.2175	0.465477	1.98881	0.106071	15.7667		Number of mol (n)	4.99942e-05
201.333	I28	1.34759e+08	6.15975e+06	4.43364e+07	5.97116e+07	3.93708e+06	11.2441	0.521372	1.96117	0.0859482	15.7738		actual volume of reaction (L)	0.0211
208.467	I29	1.33556e+08	4.82801e+06	4.40282e+07	5.97225e+07	4.04932e+06	11.2664	0.412329	1.97919	0.0891941	15.7263		[Rh] (M)	0.00236939
216.35	I30	1.34475e+08	6.12101e+06	46160740	5.79661e+07	3.70981e+06	11.7315	0.519185	1.90786	0.0811576	16.1475		[Rh] (mM)	2.36939		[PPh3]	7.10818
223.5	I31	1.34688e+08	5.36286e+06	4.48548e+07	5.86274e+07	5.02208e+06	11.3815	0.454158	1.92657	0.109691	15.7985
230.6	I32	1.34658e+08	5.4401e+06	4.41684e+07	5.89241e+07	4.72183e+06	11.2099	0.460805	1.93676	0.103157	15.6474
237.717	I33	135937388	5.80523e+06	4.5022e+07	5.89625e+07	3.66251e+06	11.319	0.487104	1.91978	0.0792609	15.7249
244.833	I34	135818395	5.38698e+06	4.51297e+07	5.93649e+07	4.59756e+06	11.356	0.452405	1.93457	0.0995837	15.7771
251.967	I35	1.3439e+08	6.10503e+06	4.64796e+07	5.94859e+07	4.40091e+06	11.82	0.518159	1.95912	0.0963378	16.3527
259.083	I36	1.34368e+08	5.84834e+06	4.57919e+07	5.67214e+07	3179791	11.647	0.496451	1.86837	0.0696179	15.9498
266.2	I37	1.33639e+08	6.20085e+06	4.72102e+07	5.94137e+07	4.79938e+06	12.0733	0.529249	1.96774	0.105651	16.6436
273.3	I38	1.33997e+08	5.74151e+06	4.61421e+07	5.69292e+07	4.5468e+06	11.7686	0.488734	1.88042	0.099823	16.118
280.433	I39	1.34324e+08	5.47811e+06	4.45082e+07	5.79465e+07	3.72467e+06	11.3242	0.465177	1.90936	0.0815744	15.6896
																						7.45221
																						6.90797
																					Object	Integral [abs]	Integral [rel]
																					Integral 1	1.6066e+06	0.7651
																					Integral 2	1.63721e+06	0.7797
																					Integral 3	2.44396e+07	11.6394
																					Object	Integral [abs]	Integral [rel]
																					Integral 1	1.04717e+07	0.8794
																					Integral 2	1.22008e+07	1.0247
																					Integral 3	1.68828e+08	14.1785

## Sheet: comparison
time	phosphorus	hydride	error		time	hydride	phosphorus	error
7.7	-0.0145129	-0.00497256	-0.954034		7.7	-0.00125008	-0.00418913	0.293904
14.8333	0.159592	0.0140481	14.5544		14.8333	-0.00338641	0.02465	-2.80364
21.9667	0.387239	0.232923	15.4316		21.9667	0.00345261	4.33425e-05	0.340926
29.1167	0.562363	0.447415	11.4947		29.1167	0.00931104	0.00675917	0.255187
36.2333	0.760517	0.608982	15.1535		36.2333	0.0120731	-0.0139027	2.59758
43.3833	0.938582	0.770532	16.805		43.3833	0.0125092	0.000925709	1.15835
50.5333	1.07723	0.910554	16.6673		50.5333	0.0229678	-0.00177869	2.47465
57.6667	1.18675	1.04773	13.9022		57.6667	0.0262412	0.0260386	0.0202631
64.7667	1.32085	1.16691	15.3937		64.7667	0.0216683	0.0457981	-2.41298
71.9167	1.39614	1.25163	14.4514		71.9167	0.0254324	0.00444129	2.09911
79.9167	1.54912	1.31634	23.2783		79.9167	0.0255768	0.0459748	-2.0398
87.05	1.63474	1.40305	23.17		87.05	0.0422603	0.0436425	-0.138216
94.15	1.6899	1.4644	22.5498		94.15	0.0351225	0.0221075	1.3015
101.333	1.71031	1.51666	19.3646		101.333	0.0304574	0.0437182	-1.32608
108.45	1.76324	1.5903	17.2941		108.45	0.03707	0.0558336	-1.87635
115.567	1.817	1.61163	20.5368		115.567	0.0490216	0.0612442	-1.22226
122.683	1.8504	1.64013	21.0263		122.683	0.0581084	0.0555266	0.258172
129.8	1.86935	1.76399	10.5356		129.8	0.0660869	0.0532133	1.28736
136.933	1.89704	1.7242	17.2838		136.933	0.0602161	0.0749599	-1.47438
144.05	1.93766	1.75553	18.2124		144.05	0.065162	0.0648275	0.0334454
151.867	1.94647	1.79187	15.4601		151.867	0.0778185	0.0660554	1.17631
159.017	1.96015	1.8086	15.1546		159.017	0.0773971	0.061909	1.54881
166.15	1.98023	1.7942	18.6025		166.15	0.0695177	0.0728615	-0.334385
173.283	2.0244	1.84462	17.9783		173.283	0.0733277	0.0872826	-1.39549
180.417	1.92939	1.82741	10.1978		180.417	0.0840069	0.0865248	-0.251788
187.533	1.96583	1.8201	14.5724		187.533	0.0951741	0.086019	0.9155
194.667	1.94851	1.82724	12.1271		194.667	0.0918279	0.0572398	3.45881
201.8	1.98881	1.87482	11.3994		201.8	0.0979224	0.106071	-0.814894
208.95	1.96117	1.83956	12.1613		208.95	0.0922247	0.0859482	0.627654
216.067	1.97919	1.88362	9.55666		216.067	0.0995473	0.0891941	1.03532
223.967	1.90786	1.83034	7.75158		223.967	0.0941967	0.0811576	1.30391
231.1	1.92657	1.88497	4.16013		231.1	0.103621	0.109691	-0.606983
238.233	1.93676	1.80773	12.9034		238.233	0.091988	0.103157	-1.11691
245.35	1.91978	1.87347	4.63048		245.35	0.099933	0.0792609	2.06722
252.483	1.93457	1.88085	5.37244		252.483	0.0986396	0.0995837	-0.0944069
259.6	1.95912	1.87383	8.52966		259.6	0.103179	0.0963378	0.684086
267.3	1.86837	1.87104	-0.266641		267.3	0.103447	0.0696179	3.3829
274.417	1.96774	1.86319	10.4554		274.417	0.0991625	0.105651	-0.64882
	1.88042	1.86177	1.86435			0.104097	0.099823	0.427432
	1.90936	1.82412	8.52407			0.0976346	0.0815744	1.60601
